# Supplementary material for: Identification and Characterization of Circular RNAs in Brassica rapa in Response to Plasmodiophora brassicae
Source: Research Square preprint supplement (doi:10.21203/rs.3.rs-666198/v1), 2021-08-20
Supplement: Supplementary file 1 [file 4d5eb77405243af4f3b8eb24.xlsx]

## Sheet: Sheet1
Gene ontology (GO) classification of the differentially expressed parental genes in response to P. brassica
Gene Ontology	The number of genes								Total
	ck-0-vs-Pb4-8	ck-0-vs-Pb4-23	ck-0-vs-PbE-8	ck-0-vs-PbE-23	Pb4-8-vs-Pb4-23	PbE-8-vs-PbE-23	PbE-8-vs-Pb4-8	PbE-23-vs-Pb4-23
Biological Process
metabolic process	10	12	4	19	8	18	3	2	76
cellular process	10	12	4	19	7	18	3	1	74
single-organism process	10	10	2	18	8	13	3	2	66
response to stimulus	10	9	3	17	6	13	3	1	62
multi-organism process	6	5	1	9	4	7	1	1	34
localization	4	4	0	6	4	6	1	1	26
biological regulation	4	6	0	6	0	6	2	0	24
immune system process	3	4	0	6	4	4	1	0	22
multicellular organismal process	5	3	2	6	1	4	0	0	21
signaling	2	3	0	5	2	2	1	0	15
developmental process	5	4	2	0	0	0	0	0	11
reproduction	2	2	0	2	0	4	0	0	10
cellular component organization or biogenesis	2	1	0	1	2	2	1	0	9
developmental process	0	0	0	0	1	5	1	0	7
reproductive process	2	2	0	2	0	0	0	0	6
growth	1	1	0	1	0	2	1	0	6
biological regulation	0	0	1	0	0	0	2	0	3
biological adhesion	0	0	0	0	0	1	0	0	1
Molecular Function
catalytic activity	7	6	2	14	4	12	0	1	46
binding	6	6	3	8	4	8	2	0	37
molecular function regulator	1	1	1	1	0	0	0	0	4
nucleic acid binding transcription factor activity	1	1	0	1	0	0	0	0	3
transporter activity	1	0	0	0	0	1	0	0	2
Cellular Component
cell	8	12	5	20	10	21	0	3	79
cell part	8	12	5	20	10	21	0	3	79
organelle	8	10	5	17	9	19	0	3	71
membrane	4	2	1	4	1	6	2	1	21
organelle part	3	1	1	4	3	7	0	2	21
cell junction	4	1	2	3	2	2	1	0	15
macromolecular complex	0	1	0	2	1	2	0	1	7
extracellular region	1	0	0	0	1	2	0	0	4
membrane-enclosed lumen	0	0	0	0	0	1	0	0	1
membrane part	0	0	0	0	0	1	0	0	1
Total	128	131	44	211	92	208	28	22	864
