# Supplementary material for: Identification and Characterization of Circular RNAs in Brassica rapa in Response to Plasmodiophora brassicae
Source: Research Square preprint supplement (doi:10.21203/rs.3.rs-666198/v1), 2021-08-20
Supplement: Supplementary file 7 [file dabf00944877ea2ee5cf8eaa.xlsx]

## Sheet: Sheet1
The profile of circRNAs detected in our studies
id	source_gene	chr	strand	genomic_start	genomic_end	spliced_length	annot_type
novel_circ_000001	Bra011855	A01	+	216255	220150	3896	antisense
novel_circ_000002	Bra011828	A01	-	346055	346493	439	antisense
novel_circ_000003	Bra011820	A01	+	381857	382180	324	one_exon
novel_circ_000004	NA	A01	-	393630	393900	271	intergenic
novel_circ_000005	Bra011776	A01	+	608267	608704	338	exon_intron
novel_circ_000006	Bra011765	A01	+	667289	675850	8393	exon_intron
novel_circ_000007	Bra011736	A01	-	820765	821054	203	annot_exons
novel_circ_000008	Bra011706	A01	-	953517	953829	313	antisense
novel_circ_000009	Bra011701	A01	+	978967	979439	329	annot_exons
novel_circ_000010	Bra011688	A01	+	1054749	1055114	366	one_exon
novel_circ_000011	Bra011668	A01	-	1153908	1154369	462	antisense
novel_circ_000012	Bra011627	A01	-	1355926	1356159	234	exon_intron
novel_circ_000013	Bra011529	A01	-	1811588	1811950	363	one_exon
novel_circ_000014	Bra011529	A01	-	1811648	1811962	315	one_exon
novel_circ_000015	Bra011524	A01	-	1829513	1829698	186	one_exon
novel_circ_000016	Bra011476	A01	+	2024959	2025183	225	one_exon
novel_circ_000017	Bra011467	A01	+	2055651	2064972	8012	exon_intron
novel_circ_000018	Bra011449	A01	+	2126089	2126387	299	antisense
novel_circ_000019	Bra011405	A01	-	2314469	2314802	334	antisense
novel_circ_000020	NA	A01	+	2603230	2604185	956	intergenic
novel_circ_000021	Bra011343	A01	+	2650257	2650475	219	antisense
novel_circ_000022	Bra011343	A01	+	2650260	2650475	216	antisense
novel_circ_000023	Bra011338	A01	-	2664154	2664390	237	exon_intron
novel_circ_000024	Bra011315	A01	+	2760347	2760540	194	antisense
novel_circ_000025	Bra011250	A01	+	3083238	3083411	174	one_exon
novel_circ_000026	Bra011236	A01	-	3156249	3156467	219	one_exon
novel_circ_000027	Bra011217	A01	-	3259061	3301106	41491	exon_intron
novel_circ_000028	Bra011212	A01	+	3261519	3303955	42437	exon_intron
novel_circ_000029	Bra011212	A01	+	3262685	3305059	42375	exon_intron
novel_circ_000030	Bra011217	A01	-	3262685	3305059	41820	exon_intron
novel_circ_000031	NA	A01	+	3278927	3279152	226	intergenic
novel_circ_000032	Bra011203	A01	-	3348902	3349115	214	antisense
novel_circ_000033	Bra011203	A01	-	3348907	3349189	283	antisense
novel_circ_000034	Bra011203	A01	-	3348912	3349201	290	antisense
novel_circ_000035	Bra011203	A01	-	3348917	3349204	288	antisense
novel_circ_000036	Bra011203	A01	-	3348938	3349117	180	antisense
novel_circ_000037	Bra011203	A01	-	3348938	3349159	222	antisense
novel_circ_000038	Bra011203	A01	+	3348940	3349174	235	one_exon
novel_circ_000039	Bra011203	A01	+	3348947	3349128	182	one_exon
novel_circ_000040	Bra011203	A01	-	3348958	3349111	154	antisense
novel_circ_000041	Bra011203	A01	+	3348988	3349171	184	one_exon
novel_circ_000042	Bra011189	A01	+	3414344	3414502	159	antisense
novel_circ_000043	Bra011135	A01	-	3731122	3732305	1184	exon_intron
novel_circ_000044	Bra011062	A01	+	4143306	4161424	18119	antisense
novel_circ_000045	Bra011039	A01	-	4287935	4292401	4467	exon_intron
novel_circ_000046	Bra011039	A01	+	4292238	4292388	151	antisense
novel_circ_000047	Bra040173	A01	-	4466661	4467583	741	exon_intron
novel_circ_000048	Bra040176	A01	+	4502246	4502409	164	antisense
novel_circ_000049	Bra013282	A01	+	4736025	4736190	166	antisense
novel_circ_000050	Bra013339	A01	+	5086967	5087191	225	antisense
novel_circ_000051	Bra013370	A01	+	5258727	5259584	500	annot_exons
novel_circ_000052	Bra013445	A01	-	5705831	5706086	256	antisense
novel_circ_000053	Bra013450	A01	-	5754198	5754371	174	antisense
novel_circ_000054	Bra013452	A01	+	5766295	5766604	310	exon_intron
novel_circ_000055	Bra013497	A01	+	5991933	5994502	2570	antisense
novel_circ_000056	Bra013528	A01	-	6158485	6158704	220	antisense
novel_circ_000057	Bra013576	A01	-	6435083	6435541	295	annot_exons
novel_circ_000058	Bra013576	A01	+	6435083	6435541	459	antisense
novel_circ_000059	Bra013579	A01	+	6445363	6445581	219	antisense
novel_circ_000060	Bra013579	A01	-	6445363	6445598	236	exon_intron
novel_circ_000061	Bra013579	A01	-	6445363	6445602	240	exon_intron
novel_circ_000062	Bra013579	A01	-	6445363	6445614	252	exon_intron
novel_circ_000063	Bra013579	A01	+	6445363	6445621	259	antisense
novel_circ_000064	Bra013579	A01	-	6445363	6445621	259	exon_intron
novel_circ_000065	Bra013579	A01	-	6445363	6445624	262	exon_intron
novel_circ_000066	Bra013579	A01	-	6445363	6445641	279	exon_intron
novel_circ_000067	Bra013579	A01	-	6445363	6445643	281	exon_intron
novel_circ_000068	Bra013579	A01	-	6445363	6445646	284	exon_intron
novel_circ_000069	Bra013579	A01	-	6445363	6445650	288	exon_intron
novel_circ_000070	Bra013579	A01	+	6445363	6445655	293	antisense
novel_circ_000071	Bra013579	A01	-	6445363	6445655	293	exon_intron
novel_circ_000072	Bra013579	A01	-	6445363	6445660	298	exon_intron
novel_circ_000073	Bra013579	A01	+	6445363	6445660	298	antisense
novel_circ_000074	Bra013579	A01	-	6445363	6445662	300	exon_intron
novel_circ_000075	Bra013579	A01	+	6445363	6445670	308	antisense
novel_circ_000076	Bra013579	A01	-	6445363	6445672	310	exon_intron
novel_circ_000077	Bra013579	A01	+	6445363	6445672	310	antisense
novel_circ_000078	Bra013579	A01	-	6445363	6445680	318	exon_intron
novel_circ_000079	Bra013579	A01	-	6445363	6445681	319	exon_intron
novel_circ_000080	Bra013579	A01	-	6445363	6445686	324	exon_intron
novel_circ_000081	Bra013579	A01	+	6445363	6445686	324	antisense
novel_circ_000082	Bra013579	A01	-	6445363	6445697	335	exon_intron
novel_circ_000083	Bra013579	A01	+	6445363	6445697	335	antisense
novel_circ_000084	Bra013579	A01	+	6445363	6445703	341	antisense
novel_circ_000085	Bra013579	A01	+	6445363	6445709	347	antisense
novel_circ_000086	Bra013579	A01	+	6445363	6445713	351	antisense
novel_circ_000087	Bra013579	A01	+	6445363	6445715	353	antisense
novel_circ_000088	Bra013579	A01	-	6445363	6445724	362	exon_intron
novel_circ_000089	Bra013579	A01	+	6445363	6445724	362	antisense
novel_circ_000090	Bra013579	A01	-	6445363	6445730	368	exon_intron
novel_circ_000091	Bra013579	A01	+	6445363	6445730	368	antisense
novel_circ_000092	Bra013579	A01	+	6445363	6445738	376	antisense
novel_circ_000093	Bra013579	A01	+	6445363	6445739	377	antisense
novel_circ_000094	Bra013579	A01	+	6445363	6445746	384	antisense
novel_circ_000095	Bra013579	A01	+	6445363	6445748	386	antisense
novel_circ_000096	Bra013579	A01	-	6445363	6445748	386	exon_intron
novel_circ_000097	Bra013579	A01	+	6445363	6445752	390	antisense
novel_circ_000098	Bra013579	A01	+	6445363	6445754	392	antisense
novel_circ_000099	Bra013579	A01	-	6445363	6445761	399	exon_intron
novel_circ_000100	Bra013579	A01	+	6445363	6445761	399	antisense
novel_circ_000101	Bra013579	A01	-	6445363	6445769	407	exon_intron
novel_circ_000102	Bra013579	A01	+	6445363	6445769	407	antisense
novel_circ_000103	Bra013579	A01	+	6445363	6445775	413	antisense
novel_circ_000104	Bra013579	A01	+	6445363	6445776	414	antisense
novel_circ_000105	Bra013579	A01	+	6445363	6445784	422	antisense
novel_circ_000106	Bra013579	A01	-	6445363	6445784	422	exon_intron
novel_circ_000107	Bra013579	A01	+	6445363	6445790	428	antisense
novel_circ_000108	Bra013579	A01	-	6445363	6445793	431	exon_intron
novel_circ_000109	Bra013579	A01	+	6445363	6445793	431	antisense
novel_circ_000110	Bra013579	A01	-	6445363	6445796	434	exon_intron
novel_circ_000111	Bra013579	A01	+	6445363	6445796	434	antisense
novel_circ_000112	Bra013579	A01	-	6445363	6445808	446	exon_intron
novel_circ_000113	Bra013579	A01	+	6445363	6445808	446	antisense
novel_circ_000114	Bra013579	A01	+	6445363	6445817	455	antisense
novel_circ_000115	Bra013579	A01	+	6445363	6445822	460	antisense
novel_circ_000116	Bra013579	A01	+	6445363	6445828	466	antisense
novel_circ_000117	Bra013579	A01	+	6445363	6445874	512	antisense
novel_circ_000118	Bra013579	A01	+	6445363	6446025	663	antisense
novel_circ_000119	Bra013579	A01	+	6445406	6445668	263	antisense
novel_circ_000120	Bra013579	A01	+	6445727	6445965	239	antisense
novel_circ_000121	Bra013608	A01	+	6623728	6632047	7951	exon_intron
novel_circ_000122	Bra013632	A01	+	6757661	6757822	162	one_exon
novel_circ_000123	Bra013634	A01	+	6776707	6777195	489	one_exon
novel_circ_000124	Bra013676	A01	-	7072813	7073004	192	one_exon
novel_circ_000125	Bra013681	A01	+	7094746	7103500	1893	annot_exons
novel_circ_000126	Bra013681	A01	+	7094746	7111412	9491	exon_intron
novel_circ_000127	Bra013681	A01	+	7094746	7128789	26868	exon_intron
novel_circ_000128	Bra013681	A01	+	7095054	7103819	1904	exon_intron
novel_circ_000129	Bra013684	A01	-	7132795	7136873	1805	exon_intron
novel_circ_000130	Bra013707	A01	+	7291027	7291258	232	antisense
novel_circ_000131	Bra013715	A01	+	7368523	7368795	273	one_exon
novel_circ_000132	Bra013717	A01	-	7372461	7373162	702	antisense
novel_circ_000133	Bra013774	A01	-	7722323	7722727	405	one_exon
novel_circ_000134	Bra013799	A01	+	7806152	7807030	454	annot_exons
novel_circ_000135	Bra013836	A01	+	8022096	8022472	377	one_exon
novel_circ_000136	Bra013865	A01	-	8140689	8140868	180	one_exon
novel_circ_000137	Bra013900	A01	+	8373735	8373893	159	exon_intron
novel_circ_000138	Bra013903	A01	-	8390220	8390371	152	antisense
novel_circ_000139	Bra013903	A01	+	8390220	8390371	152	one_exon
novel_circ_000140	Bra013952	A01	-	8678770	8679359	590	antisense
novel_circ_000141	Bra026257	A01	+	10135105	10144611	8858	exon_intron
novel_circ_000142	Bra026237	A01	+	10268764	10268975	212	exon_intron
novel_circ_000143	Bra038489	A01	+	10712782	10713186	405	one_exon
novel_circ_000144	Bra033547	A01	+	11023857	11024084	228	one_exon
novel_circ_000145	Bra033513	A01	+	11288164	11288712	549	antisense
novel_circ_000146	Bra039563	A01	+	11714861	11715022	162	antisense
novel_circ_000147	Bra040695	A01	-	11825412	11825791	380	one_exon
novel_circ_000148	Bra036921	A01	+	11899223	11899589	367	antisense
novel_circ_000149	Bra036921	A01	+	11900009	11900314	306	antisense
novel_circ_000150	NA	A01	+	11901327	11901964	638	intergenic
novel_circ_000151	Bra036869	A01	+	12368960	12369091	132	one_exon
novel_circ_000152	Bra037608	A01	-	12650779	12655791	1353	exon_intron
novel_circ_000153	Bra033813	A01	+	13402235	13402388	154	one_exon
novel_circ_000154	Bra033805	A01	+	13459988	13463501	3514	antisense
novel_circ_000155	Bra033804	A01	+	13459988	13467373	7386	exon_intron
novel_circ_000156	NA	A01	-	13550153	13555784	5632	intergenic
novel_circ_000157	NA	A01	-	13550433	13556034	5602	intergenic
novel_circ_000158	NA	A01	+	13617774	13617976	203	intergenic
novel_circ_000159	NA	A01	-	13964539	13965036	498	intergenic
novel_circ_000160	NA	A01	+	13964543	13965040	498	intergenic
novel_circ_000161	NA	A01	+	14284627	14284836	210	intergenic
novel_circ_000162	NA	A01	-	14284627	14284836	210	intergenic
novel_circ_000163	Bra029919	A01	-	14358974	14359409	436	antisense
novel_circ_000164	Bra029927	A01	+	14406458	14407461	1004	antisense
novel_circ_000165	NA	A01	-	14789399	14789941	543	intergenic
novel_circ_000166	Bra035471	A01	+	15740325	15740698	374	antisense
novel_circ_000167	Bra035466	A01	-	15791238	15791525	216	annot_exons
novel_circ_000168	Bra035438	A01	+	16095132	16096306	563	exon_intron
novel_circ_000169	Bra035438	A01	+	16095132	16098687	1102	exon_intron
novel_circ_000170	Bra035438	A01	+	16095135	16098687	1099	exon_intron
novel_circ_000171	NA	A01	+	16485484	16487423	1940	intergenic
novel_circ_000172	Bra031521	A01	+	16602689	16603093	405	one_exon
novel_circ_000173	Bra028339	A01	+	18259644	18260153	510	one_exon
novel_circ_000174	Bra023734	A01	-	18617217	18621946	4641	exon_intron
novel_circ_000175	NA	A01	+	19226772	19228922	2151	intergenic
novel_circ_000176	Bra023825	A01	-	19373751	19374031	281	exon_intron
novel_circ_000177	Bra023825	A01	-	19375211	19375397	187	one_exon
novel_circ_000178	Bra023829	A01	-	19405740	19406308	478	annot_exons
novel_circ_000179	Bra023830	A01	-	19425364	19425646	283	one_exon
novel_circ_000180	Bra023901	A01	+	20071284	20072731	953	exon_intron
novel_circ_000181	Bra037544	A01	+	20958934	20959906	345	annot_exons
novel_circ_000182	Bra037563	A01	-	21129721	21135631	1937	exon_intron
novel_circ_000183	Bra037578	A01	-	21217938	21218185	248	exon_intron
novel_circ_000184	Bra037581	A01	+	21279864	21280015	152	antisense
novel_circ_000185	Bra021321	A01	+	21393841	21426554	32629	exon_intron
novel_circ_000186	Bra021320	A01	-	21393841	21426554	28627	exon_intron
novel_circ_000187	Bra021281	A01	+	21963891	21964045	155	antisense
novel_circ_000188	Bra021281	A01	-	21963891	21964045	155	exon_intron
novel_circ_000189	Bra021275	A01	-	22037236	22037564	246	annot_exons
novel_circ_000190	Bra021239	A01	+	22313596	22313814	219	one_exon
novel_circ_000191	Bra021214	A01	+	22496184	22496367	184	exon_intron
novel_circ_000192	Bra021214	A01	-	22496184	22496367	184	antisense
novel_circ_000193	Bra021194	A01	+	22607267	22609732	2466	antisense
novel_circ_000194	Bra021137	A01	+	22950811	22951582	772	antisense
novel_circ_000195	Bra021551	A01	-	23755031	23755294	264	antisense
novel_circ_000196	Bra021530	A01	-	23893939	23894389	451	antisense
novel_circ_000197	Bra021526	A01	-	23916055	23917007	615	annot_exons
novel_circ_000198	Bra021503	A01	-	24090856	24093225	2370	antisense
novel_circ_000199	Bra038734	A01	-	24264369	24264610	242	antisense
novel_circ_000200	Bra038734	A01	-	24264607	24264787	181	antisense
novel_circ_000201	Bra038734	A01	-	24264701	24264856	156	antisense
novel_circ_000202	Bra038674	A01	-	24532498	24533055	558	one_exon
novel_circ_000203	Bra034167	A01	-	24644993	24645178	186	antisense
novel_circ_000204	Bra034148	A01	-	24765175	24765455	281	antisense
novel_circ_000205	Bra034060	A01	-	25189413	25189854	442	antisense
novel_circ_000206	Bra040057	A01	+	25284156	25287213	2820	exon_intron
novel_circ_000207	Bra021377	A01	-	26388120	26388332	213	one_exon
novel_circ_000208	Bra021418	A01	-	26504793	26505070	278	exon_intron
novel_circ_000209	Bra021418	A01	-	26505378	26505547	170	one_exon
novel_circ_000210	Bra021418	A01	+	26505378	26505547	170	antisense
novel_circ_000211	Bra021422	A01	-	26513708	26514033	326	one_exon
novel_circ_000212	Bra028918	A02	+	15190	15378	189	one_exon
novel_circ_000213	Bra028851	A02	-	361022	361259	238	antisense
novel_circ_000214	Bra028836	A02	-	440834	441100	267	exon_intron
novel_circ_000215	Bra028740	A02	+	905509	906207	699	antisense
novel_circ_000216	Bra028735	A02	-	938420	939099	680	exon_intron
novel_circ_000217	Bra028714	A02	-	1030660	1030944	285	one_exon
novel_circ_000218	Bra028684	A02	+	1183376	1183648	273	antisense
novel_circ_000219	Bra028631	A02	-	1391870	1392067	198	intronic
novel_circ_000220	Bra023327	A02	+	1830983	1831232	250	one_exon
novel_circ_000221	Bra023376	A02	+	2042306	2042515	210	one_exon
novel_circ_000222	Bra023378	A02	-	2055606	2055767	162	one_exon
novel_circ_000223	Bra023386	A02	-	2099759	2104628	2786	exon_intron
novel_circ_000224	Bra023392	A02	+	2129661	2129969	309	antisense
novel_circ_000225	Bra023397	A02	-	2165782	2172493	6712	exon_intron
novel_circ_000226	Bra023397	A02	+	2165783	2172494	6712	antisense
novel_circ_000227	Bra023409	A02	+	2235511	2235668	158	antisense
novel_circ_000228	Bra023439	A02	+	2349617	2349916	300	antisense
novel_circ_000229	Bra023439	A02	-	2349648	2349925	278	one_exon
novel_circ_000230	Bra023439	A02	+	2349678	2349916	239	antisense
novel_circ_000231	Bra023511	A02	-	2676206	2676889	459	exon_intron
novel_circ_000232	Bra023544	A02	-	2835475	2835792	318	one_exon
novel_circ_000233	Bra023544	A02	+	2835746	2836099	354	antisense
novel_circ_000234	Bra023565	A02	-	2919025	2919176	152	one_exon
novel_circ_000235	Bra023588	A02	+	3053543	3054004	462	one_exon
novel_circ_000236	Bra020037	A02	-	3717303	3717573	271	one_exon
novel_circ_000237	Bra020040	A02	-	3746402	3746779	378	exon_intron
novel_circ_000238	Bra020082	A02	-	3937939	3938223	285	antisense
novel_circ_000239	Bra020153	A02	+	4265766	4266428	663	antisense
novel_circ_000240	Bra020169	A02	-	4356312	4356588	277	one_exon
novel_circ_000241	Bra020234	A02	+	4695460	4695649	190	one_exon
novel_circ_000242	Bra020253	A02	-	4846204	4852977	6687	exon_intron
novel_circ_000243	Bra020284	A02	+	4988001	4994368	6368	antisense
novel_circ_000244	Bra020331	A02	+	5154654	5232063	76748	exon_intron
novel_circ_000245	Bra020375	A02	-	5430566	5430766	201	one_exon
novel_circ_000246	Bra020375	A02	+	5431055	5431447	393	antisense
novel_circ_000247	Bra020382	A02	-	5454145	5454318	174	exon_intron
novel_circ_000248	Bra020454	A02	+	5837694	5839619	1926	exon_intron
novel_circ_000249	Bra035647	A02	-	5948939	5949263	325	one_exon
novel_circ_000250	NA	A02	+	5964285	5968663	4379	intergenic
novel_circ_000251	NA	A02	-	5973881	5974023	143	intergenic
novel_circ_000252	Bra035641	A02	+	5996470	5996794	325	one_exon
novel_circ_000253	NA	A02	-	6167029	6167286	258	intergenic
novel_circ_000254	Bra035582	A02	-	6397525	6398519	573	annot_exons
novel_circ_000255	Bra035574	A02	+	6436435	6439615	3181	antisense
novel_circ_000256	Bra022721	A02	+	6786624	6787106	483	antisense
novel_circ_000257	Bra022605	A02	-	7556074	7570309	14144	exon_intron
novel_circ_000258	Bra022585	A02	-	7716645	7717286	537	exon_intron
novel_circ_000259	Bra022585	A02	-	7717095	7717283	189	one_exon
novel_circ_000260	Bra022511	A02	+	8322950	8323648	699	antisense
novel_circ_000261	Bra022500	A02	-	8397947	8398363	417	antisense
novel_circ_000262	Bra022484	A02	+	8472686	8473115	430	antisense
novel_circ_000263	Bra022478	A02	+	8503346	8503833	488	antisense
novel_circ_000264	Bra039746	A02	+	8698950	8702503	3554	exon_intron
novel_circ_000265	Bra039746	A02	+	8699234	8702180	2947	exon_intron
novel_circ_000266	Bra039746	A02	+	8699909	8702180	2272	exon_intron
novel_circ_000267	Bra039746	A02	+	8699931	8702180	2250	exon_intron
novel_circ_000268	Bra039746	A02	+	8700292	8702180	1889	exon_intron
novel_circ_000269	Bra039746	A02	+	8700464	8702180	1717	exon_intron
novel_circ_000270	Bra039746	A02	+	8700818	8702180	1363	exon_intron
novel_circ_000271	NA	A02	+	8765446	8766347	902	intergenic
novel_circ_000272	Bra039756	A02	-	8770024	8770340	237	annot_exons
novel_circ_000273	Bra034020	A02	-	9144127	9150027	5125	annot_exons
novel_circ_000274	Bra038313	A02	-	10337338	10337995	512	exon_intron
novel_circ_000275	Bra007911	A02	-	10808182	10808419	238	antisense
novel_circ_000276	Bra007911	A02	-	10808196	10808358	163	antisense
novel_circ_000277	Bra008027	A02	-	11642883	11643132	250	one_exon
novel_circ_000278	Bra008033	A02	-	11687041	11687540	369	exon_intron
novel_circ_000279	Bra008033	A02	-	11687266	11687512	116	annot_exons
novel_circ_000280	NA	A02	+	11812687	11814766	2080	intergenic
novel_circ_000281	Bra008046	A02	-	11841862	11842044	183	antisense
novel_circ_000282	Bra008067	A02	+	11994078	11995166	325	exon_intron
novel_circ_000283	Bra008067	A02	+	11994639	11994920	282	intronic
novel_circ_000284	Bra008080	A02	-	12033417	12033658	242	one_exon
novel_circ_000285	Bra008093	A02	-	12093927	12095234	1308	antisense
novel_circ_000286	NA	A02	-	12346872	12358345	11474	intergenic
novel_circ_000287	Bra008242	A02	-	13037940	13038323	384	exon_intron
novel_circ_000288	Bra008242	A02	+	13038053	13038328	276	antisense
novel_circ_000289	Bra008242	A02	-	13038072	13038275	204	one_exon
novel_circ_000290	Bra008242	A02	-	13038072	13038343	272	one_exon
novel_circ_000291	Bra008245	A02	-	13056279	13056593	315	exon_intron
novel_circ_000292	Bra008261	A02	-	13185323	13185793	471	antisense
novel_circ_000293	Bra008279	A02	-	13309343	13309663	321	one_exon
novel_circ_000294	Bra008327	A02	+	13738783	13742661	3879	antisense
novel_circ_000295	Bra008355	A02	-	14003467	14003627	161	antisense
novel_circ_000296	Bra008433	A02	-	14606802	14607030	229	one_exon
novel_circ_000297	Bra008512	A02	-	15089695	15090232	538	one_exon
novel_circ_000298	NA	A02	-	15589798	15592043	2246	intergenic
novel_circ_000299	NA	A02	+	15589798	15592043	2246	intergenic
novel_circ_000300	Bra033135	A02	-	16489483	16492693	3211	antisense
novel_circ_000301	NA	A02	+	16509581	16510104	524	intergenic
novel_circ_000302	NA	A02	-	16954260	16957589	3330	intergenic
novel_circ_000303	Bra021982	A02	+	17805429	17805636	208	one_exon
novel_circ_000304	Bra021982	A02	+	17805485	17806111	627	one_exon
novel_circ_000305	Bra021999	A02	-	18019660	18020037	378	antisense
novel_circ_000306	Bra022022	A02	+	18290119	18290338	220	antisense
novel_circ_000307	Bra022156	A02	+	19384375	19384798	246	exon_intron
novel_circ_000308	Bra026656	A02	+	19569938	19575127	5115	exon_intron
novel_circ_000309	Bra026653	A02	+	19614132	19614835	405	exon_intron
novel_circ_000310	Bra026639	A02	+	19716646	19716922	277	exon_intron
novel_circ_000311	Bra026613	A02	+	20075717	20076280	564	antisense
novel_circ_000312	Bra026580	A02	+	20321946	20322157	212	antisense
novel_circ_000313	Bra026571	A02	-	20387687	20388026	340	antisense
novel_circ_000314	NA	A02	+	21250719	21251988	1270	intergenic
novel_circ_000315	Bra036335	A02	+	21562521	21562909	301	exon_intron
novel_circ_000316	Bra032937	A02	+	21684829	21685539	711	antisense
novel_circ_000317	Bra033056	A02	+	22457760	22460135	2376	antisense
novel_circ_000318	Bra033102	A02	+	22685817	22692525	6709	antisense
novel_circ_000319	Bra033102	A02	-	22685817	22692525	4835	exon_intron
novel_circ_000320	Bra020701	A02	+	23125938	23134983	4123	exon_intron
novel_circ_000321	Bra020518	A02	+	24274734	24274956	223	antisense
novel_circ_000322	Bra020472	A02	+	24629627	24629883	257	one_exon
novel_circ_000323	Bra020469	A02	+	24645864	24648791	2342	exon_intron
novel_circ_000324	Bra029356	A02	+	25103670	25115749	12080	antisense
novel_circ_000325	Bra029326	A02	-	25309412	25315279	5015	exon_intron
novel_circ_000326	Bra029296	A02	+	25502577	25502906	206	annot_exons
novel_circ_000327	Bra029250	A02	-	25769581	25769996	416	antisense
novel_circ_000328	Bra029222	A02	-	25928457	25928931	316	exon_intron
novel_circ_000329	Bra031898	A02	-	26316221	26316496	276	one_exon
novel_circ_000330	Bra031874	A02	-	26455225	26456033	724	exon_intron
novel_circ_000331	Bra005675	A03	+	87981	88894	914	antisense
novel_circ_000332	Bra005762	A03	-	475594	475886	293	one_exon
novel_circ_000333	Bra005881	A03	+	1041409	1041804	396	one_exon
novel_circ_000334	Bra005938	A03	+	1316508	1327337	10830	antisense
novel_circ_000335	Bra005949	A03	+	1365115	1365408	294	one_exon
novel_circ_000336	Bra005998	A03	-	1542139	1551368	9230	exon_intron
novel_circ_000337	Bra006006	A03	+	1588415	1588943	440	exon_intron
novel_circ_000338	Bra006016	A03	+	1636071	1636299	229	one_exon
novel_circ_000339	Bra006035	A03	-	1697755	1699156	763	annot_exons
novel_circ_000340	Bra006068	A03	-	1851369	1851637	269	one_exon
novel_circ_000341	Bra006094	A03	-	1962362	1962649	288	one_exon
novel_circ_000342	Bra006148	A03	-	2228648	2228821	174	one_exon
novel_circ_000343	Bra006210	A03	-	2532550	2532699	150	one_exon
novel_circ_000344	Bra006216	A03	+	2552411	2558521	6111	exon_intron
novel_circ_000345	Bra006216	A03	+	2552413	2558523	6111	exon_intron
novel_circ_000346	Bra006215	A03	-	2552413	2558523	5607	exon_intron
novel_circ_000347	Bra006215	A03	-	2552419	2558529	5607	exon_intron
novel_circ_000348	Bra006301	A03	-	2921973	2922275	303	one_exon
novel_circ_000349	Bra006341	A03	-	3095768	3095880	113	antisense
novel_circ_000350	Bra006348	A03	+	3119311	3132090	12780	exon_intron
novel_circ_000351	Bra006347	A03	-	3119311	3132090	9033	exon_intron
novel_circ_000352	Bra006367	A03	+	3201955	3202183	229	one_exon
novel_circ_000353	Bra006386	A03	+	3287284	3298157	10874	antisense
novel_circ_000354	Bra006416	A03	+	3415846	3416357	512	antisense
novel_circ_000355	NA	A03	-	3503119	3503583	465	intergenic
novel_circ_000356	Bra006446	A03	-	3514108	3519657	4108	exon_intron
novel_circ_000357	Bra006447	A03	-	3516416	3522139	4784	exon_intron
novel_circ_000358	Bra006447	A03	+	3519871	3520085	215	antisense
novel_circ_000359	Bra006447	A03	+	3519876	3520090	215	antisense
novel_circ_000360	Bra006447	A03	+	3519877	3520091	215	antisense
novel_circ_000361	Bra006447	A03	-	3519879	3520093	215	exon_intron
novel_circ_000362	Bra006452	A03	-	3543498	3555243	10648	exon_intron
novel_circ_000363	Bra006506	A03	+	3827802	3828032	231	one_exon
novel_circ_000364	Bra006588	A03	-	4173815	4174002	188	antisense
novel_circ_000365	Bra006633	A03	-	4378328	4378603	276	exon_intron
novel_circ_000366	Bra006679	A03	-	4590285	4599235	8689	exon_intron
novel_circ_000367	Bra006679	A03	-	4590554	4599600	8544	exon_intron
novel_circ_000368	Bra006679	A03	-	4591555	4600650	8035	exon_intron
novel_circ_000369	Bra006679	A03	-	4591555	4600746	8131	exon_intron
novel_circ_000370	Bra006722	A03	+	4794432	4794896	392	annot_exons
novel_circ_000371	Bra006747	A03	+	4884933	4885388	456	exon_intron
novel_circ_000372	Bra006767	A03	+	4974193	4974458	266	exon_intron
novel_circ_000373	Bra028952	A03	+	5562808	5582472	19265	exon_intron
novel_circ_000374	Bra028949	A03	-	5562808	5582472	19152	exon_intron
novel_circ_000375	Bra029041	A03	-	6026803	6027678	675	annot_exons
novel_circ_000376	Bra029054	A03	-	6077955	6078205	251	exon_intron
novel_circ_000377	Bra029067	A03	+	6163552	6163821	270	antisense
novel_circ_000378	Bra029068	A03	-	6186283	6186476	194	antisense
novel_circ_000379	Bra029068	A03	+	6186312	6186521	210	one_exon
novel_circ_000380	Bra029068	A03	-	6186325	6186517	193	antisense
novel_circ_000381	Bra029068	A03	+	6186325	6186517	193	one_exon
novel_circ_000382	Bra029068	A03	+	6186333	6186482	150	one_exon
novel_circ_000383	Bra029104	A03	-	6385259	6385428	170	antisense
novel_circ_000384	Bra029129	A03	-	6498066	6498458	297	exon_intron
novel_circ_000385	Bra029177	A03	-	6717828	6717992	165	antisense
novel_circ_000386	NA	A03	-	7156610	7156837	228	intergenic
novel_circ_000387	Bra022804	A03	-	7157861	7160989	2624	exon_intron
novel_circ_000388	Bra022840	A03	-	7368832	7368987	156	one_exon
novel_circ_000389	NA	A03	+	7396888	7397483	596	intergenic
novel_circ_000390	Bra022870	A03	+	7492724	7492923	200	one_exon
novel_circ_000391	Bra023075	A03	-	8561914	8562116	203	antisense
novel_circ_000392	Bra023075	A03	-	8561914	8562139	226	antisense
novel_circ_000393	Bra023075	A03	-	8561914	8562143	230	antisense
novel_circ_000394	Bra000058	A03	+	9125003	9125229	227	one_exon
novel_circ_000395	Bra000064	A03	-	9149016	9149537	522	antisense
novel_circ_000396	Bra000114	A03	-	9336162	9336395	234	exon_intron
novel_circ_000397	Bra000115	A03	-	9351593	9352018	426	antisense
novel_circ_000398	Bra000115	A03	-	9351596	9352018	423	antisense
novel_circ_000399	Bra000121	A03	-	9390145	9402906	9600	exon_intron
novel_circ_000400	Bra000121	A03	-	9390582	9403554	10778	exon_intron
novel_circ_000401	Bra000122	A03	-	9390859	9419242	26751	exon_intron
novel_circ_000402	Bra000158	A03	-	9638832	9639176	345	one_exon
novel_circ_000403	Bra000164	A03	-	9673688	9673969	282	one_exon
novel_circ_000404	Bra000220	A03	+	9974944	9975256	313	one_exon
novel_circ_000405	Bra000242	A03	-	10127810	10128082	273	one_exon
novel_circ_000406	Bra000296	A03	-	10418842	10419262	421	antisense
novel_circ_000407	Bra000399	A03	+	10953438	10953621	184	one_exon
novel_circ_000408	Bra000455	A03	+	11218833	11219138	306	one_exon
novel_circ_000409	Bra000460	A03	-	11233742	11234041	300	antisense
novel_circ_000410	Bra000460	A03	+	11233867	11234088	222	one_exon
novel_circ_000411	Bra000508	A03	-	11519796	11520035	240	antisense
novel_circ_000412	NA	A03	-	11743740	11744589	850	intergenic
novel_circ_000413	Bra000592	A03	-	11957303	11962955	5582	exon_intron
novel_circ_000414	Bra000592	A03	-	11957855	11963501	5506	exon_intron
novel_circ_000415	Bra000594	A03	-	11976952	11977226	275	one_exon
novel_circ_000416	Bra000594	A03	-	11976957	11977139	183	one_exon
novel_circ_000417	Bra000602	A03	-	12022518	12022698	181	antisense
novel_circ_000418	Bra000657	A03	-	12346252	12346508	257	exon_intron
novel_circ_000419	Bra000657	A03	+	12347857	12348360	504	antisense
novel_circ_000420	Bra000661	A03	+	12366565	12366918	354	one_exon
novel_circ_000421	Bra000743	A03	+	12831921	12832199	279	antisense
novel_circ_000422	Bra000811	A03	+	13317547	13317796	250	exon_intron
novel_circ_000423	Bra000910	A03	-	13883900	13884193	294	one_exon
novel_circ_000424	Bra000969	A03	+	14193336	14193581	246	one_exon
novel_circ_000425	Bra000973	A03	+	14221223	14222314	1092	antisense
novel_circ_000426	Bra001086	A03	-	14682160	14682423	264	antisense
novel_circ_000427	Bra001091	A03	-	14704476	14759748	53547	exon_intron
novel_circ_000428	NA	A03	-	15037176	15037354	179	intergenic
novel_circ_000429	Bra001161	A03	-	15046977	15047414	359	annot_exons
novel_circ_000430	Bra001200	A03	+	15289973	15290230	258	antisense
novel_circ_000431	Bra001249	A03	-	15543790	15544327	538	antisense
novel_circ_000432	NA	A03	+	15567190	15567388	199	intergenic
novel_circ_000433	NA	A03	-	15576512	15576840	329	intergenic
novel_circ_000434	Bra001385	A03	-	16130153	16136119	5861	exon_intron
novel_circ_000435	Bra001461	A03	+	16497449	16497922	474	exon_intron
novel_circ_000436	Bra001480	A03	+	16623012	16623191	180	exon_intron
novel_circ_000437	Bra001484	A03	-	16642841	16643256	294	annot_exons
novel_circ_000438	Bra001526	A03	+	16873223	16884001	9659	exon_intron
novel_circ_000439	Bra001525	A03	-	16873223	16884001	8122	exon_intron
novel_circ_000440	Bra001526	A03	+	16873223	16895673	21331	exon_intron
novel_circ_000441	Bra001525	A03	-	16873223	16895673	19794	exon_intron
novel_circ_000442	Bra001526	A03	+	16873226	16884004	9659	exon_intron
novel_circ_000443	Bra001525	A03	-	16873231	16883707	7820	exon_intron
novel_circ_000444	Bra001525	A03	-	16873231	16883740	7853	exon_intron
novel_circ_000445	Bra001525	A03	-	16873231	16895412	19525	exon_intron
novel_circ_000446	Bra001537	A03	+	16930657	16931383	727	antisense
novel_circ_000447	Bra001676	A03	+	17816254	17838291	21013	exon_intron
novel_circ_000448	Bra001675	A03	-	17816778	17839363	16276	exon_intron
novel_circ_000449	Bra001676	A03	+	17816778	17839363	21561	exon_intron
novel_circ_000450	Bra001713	A03	-	18031282	18031462	181	one_exon
novel_circ_000451	Bra001713	A03	-	18031282	18031476	195	one_exon
novel_circ_000452	Bra001718	A03	-	18048721	18048902	182	exon_intron
novel_circ_000453	Bra001726	A03	+	18086873	18106311	17092	exon_intron
novel_circ_000454	Bra001726	A03	+	18086873	18107462	18243	exon_intron
novel_circ_000455	Bra001726	A03	+	18086873	18107519	18300	exon_intron
novel_circ_000456	Bra001752	A03	-	18267459	18267836	378	one_exon
novel_circ_000457	Bra001771	A03	-	18375794	18376012	219	antisense
novel_circ_000458	Bra001781	A03	-	18427252	18427547	227	annot_exons
novel_circ_000459	Bra001950	A03	+	19572095	19572316	222	antisense
novel_circ_000460	Bra001950	A03	+	19572095	19572421	327	antisense
novel_circ_000461	Bra001950	A03	+	19572095	19574410	2316	antisense
novel_circ_000462	Bra001950	A03	+	19572101	19572640	540	antisense
novel_circ_000463	Bra001950	A03	+	19572170	19572388	219	antisense
novel_circ_000464	Bra001950	A03	+	19572170	19572391	222	antisense
novel_circ_000465	Bra001950	A03	+	19572521	19572646	126	antisense
novel_circ_000466	Bra001951	A03	-	19587858	19588070	213	antisense
novel_circ_000467	Bra013247	A03	-	19672725	19673029	305	antisense
novel_circ_000468	Bra013224	A03	+	19799807	19800375	398	annot_exons
novel_circ_000469	Bra013206	A03	+	19909619	19909840	222	exon_intron
novel_circ_000470	Bra013158	A03	+	20162827	20163125	299	one_exon
novel_circ_000471	Bra013151	A03	-	20199588	20199794	207	antisense
novel_circ_000472	Bra013059	A03	+	20728974	20729318	345	antisense
novel_circ_000473	Bra013022	A03	+	20979982	20980561	580	antisense
novel_circ_000474	Bra012938	A03	-	21442841	21443065	225	one_exon
novel_circ_000475	Bra012890	A03	-	21737622	21737851	230	antisense
novel_circ_000476	Bra012889	A03	+	21745932	21746306	375	one_exon
novel_circ_000477	Bra012868	A03	-	21873133	21873333	201	one_exon
novel_circ_000478	Bra012632	A03	+	23069841	23070267	427	exon_intron
novel_circ_000479	Bra012600	A03	+	23315799	23315919	121	antisense
novel_circ_000480	Bra012570	A03	-	23512909	23517152	4244	antisense
novel_circ_000481	Bra012570	A03	-	23512909	23517511	4603	antisense
novel_circ_000482	Bra012513	A03	-	23918878	23919267	300	annot_exons
novel_circ_000483	Bra019410	A03	-	24353851	24376707	22615	exon_intron
novel_circ_000484	Bra019411	A03	+	24371098	24386165	15068	exon_intron
novel_circ_000485	Bra019410	A03	-	24371098	24386165	13177	exon_intron
novel_circ_000486	Bra019410	A03	+	24375019	24383195	8177	antisense
novel_circ_000487	Bra019406	A03	-	24393184	24393486	303	exon_intron
novel_circ_000488	Bra019406	A03	-	24393184	24393585	402	exon_intron
novel_circ_000489	Bra019406	A03	+	24393184	24393598	415	antisense
novel_circ_000490	Bra019406	A03	+	24393184	24393610	427	antisense
novel_circ_000491	Bra019406	A03	-	24393491	24393762	272	one_exon
novel_circ_000492	Bra019376	A03	+	24600479	24600829	351	one_exon
novel_circ_000493	Bra019366	A03	+	24701466	24702127	662	one_exon
novel_circ_000494	Bra019342	A03	-	24835432	24835848	333	annot_exons
novel_circ_000495	Bra019293	A03	-	25194220	25219171	24952	antisense
novel_circ_000496	Bra019271	A03	-	25360979	25361675	697	antisense
novel_circ_000497	Bra019044	A03	+	26613367	26613522	156	antisense
novel_circ_000498	Bra019044	A03	+	26613457	26613696	240	antisense
novel_circ_000499	Bra019044	A03	-	26613469	26613708	240	one_exon
novel_circ_000500	Bra019044	A03	+	26613523	26613696	174	antisense
novel_circ_000501	Bra024143	A03	+	27381612	27382149	363	annot_exons
novel_circ_000502	Bra024117	A03	-	27499034	27588008	85255	exon_intron
novel_circ_000503	Bra024101	A03	+	27663630	27663883	254	antisense
novel_circ_000504	Bra024094	A03	-	27730585	27732642	1712	exon_intron
novel_circ_000505	Bra024087	A03	-	27760422	27760834	183	annot_exons
novel_circ_000506	NA	A03	-	28278890	28279091	202	intergenic
novel_circ_000507	Bra023987	A03	+	28455221	28455451	231	one_exon
novel_circ_000508	Bra023952	A03	-	28664872	28665606	486	annot_exons
novel_circ_000509	Bra036984	A03	-	29138446	29138843	398	antisense
novel_circ_000510	Bra036984	A03	-	29138500	29138814	315	antisense
novel_circ_000511	Bra017668	A03	+	29689933	29692947	2333	exon_intron
novel_circ_000512	Bra017672	A03	-	29712612	29713028	417	one_exon
novel_circ_000513	Bra017684	A03	+	29806583	29806834	252	antisense
novel_circ_000514	Bra017734	A03	-	30159870	30160063	194	antisense
novel_circ_000515	Bra017735	A03	-	30168956	30169210	255	antisense
novel_circ_000516	Bra017741	A03	+	30192236	30192349	114	antisense
novel_circ_000517	Bra017773	A03	+	30405913	30410454	4542	antisense
novel_circ_000518	Bra017773	A03	-	30405913	30410454	4542	exon_intron
novel_circ_000519	Bra017819	A03	+	30746348	30746599	252	antisense
novel_circ_000520	Bra017820	A03	+	30746348	30750819	4472	antisense
novel_circ_000521	Bra017872	A03	-	31218915	31219383	245	exon_intron
novel_circ_000522	Bra017889	A03	-	31404386	31404578	193	antisense
novel_circ_000523	Bra017900	A03	-	31572897	31573349	381	annot_exons
novel_circ_000524	Bra040426	A04	+	172966	173222	257	antisense
novel_circ_000525	Bra014399	A04	+	318696	321801	3106	antisense
novel_circ_000526	Bra014399	A04	-	318696	321801	3005	exon_intron
novel_circ_000527	Bra014399	A04	+	318725	321830	3106	antisense
novel_circ_000528	NA	A04	+	504013	504265	253	intergenic
novel_circ_000529	NA	A04	+	504017	504269	253	intergenic
novel_circ_000530	Bra014505	A04	-	1075280	1075689	410	one_exon
novel_circ_000531	Bra014547	A04	-	1357878	1358167	290	one_exon
novel_circ_000532	Bra014605	A04	-	1730044	1731356	1313	antisense
novel_circ_000533	Bra014638	A04	-	1952257	1962980	10724	antisense
novel_circ_000534	NA	A04	-	1991802	1992211	410	intergenic
novel_circ_000535	Bra014652	A04	+	2037098	2054141	15035	exon_intron
novel_circ_000536	Bra014673	A04	+	2157433	2158117	518	annot_exons
novel_circ_000537	Bra014686	A04	-	2234482	2263790	29309	antisense
novel_circ_000538	Bra014732	A04	-	2663564	2663836	273	antisense
novel_circ_000539	Bra014744	A04	-	2749182	2759184	8970	exon_intron
novel_circ_000540	Bra014754	A04	-	2829149	2834432	5284	exon_intron
novel_circ_000541	Bra014754	A04	+	2829149	2834432	5284	antisense
novel_circ_000542	Bra039783	A04	+	3917687	3927127	9047	exon_intron
novel_circ_000543	Bra033439	A04	-	4547064	4547447	384	one_exon
novel_circ_000544	Bra033446	A04	-	4607069	4608365	589	annot_exons
novel_circ_000545	Bra033482	A04	-	4873367	4873652	286	exon_intron
novel_circ_000546	NA	A04	-	5423088	5423475	388	intergenic
novel_circ_000547	Bra032679	A04	-	5990123	5990690	376	exon_intron
novel_circ_000548	Bra032679	A04	+	5990123	5990690	568	antisense
novel_circ_000549	Bra028124	A04	-	6291524	6291716	193	antisense
novel_circ_000550	Bra028124	A04	+	6293169	6293627	459	one_exon
novel_circ_000551	Bra028192	A04	-	6901288	6901551	264	antisense
novel_circ_000552	Bra028192	A04	-	6901288	6901716	429	antisense
novel_circ_000553	Bra028211	A04	+	7073582	7073827	246	antisense
novel_circ_000554	Bra028225	A04	+	7183354	7183612	259	antisense
novel_circ_000555	Bra028225	A04	-	7183359	7183616	258	one_exon
novel_circ_000556	NA	A04	-	7282802	7283134	333	intergenic
novel_circ_000557	NA	A04	+	8408148	8408418	271	intergenic
novel_circ_000558	Bra025529	A04	-	8474419	8474666	248	one_exon
novel_circ_000559	Bra025462	A04	-	8940814	8941097	284	antisense
novel_circ_000560	Bra025450	A04	-	9033891	9034329	439	antisense
novel_circ_000561	Bra025450	A04	-	9034069	9034477	409	antisense
novel_circ_000562	NA	A04	-	9549416	9551988	2573	intergenic
novel_circ_000563	Bra030246	A04	-	10022728	10022998	271	antisense
novel_circ_000564	Bra032141	A04	+	10990604	11017670	27067	antisense
novel_circ_000565	Bra032070	A04	-	11464704	11464911	208	one_exon
novel_circ_000566	Bra032053	A04	-	11579617	11582432	2816	antisense
novel_circ_000567	NA	A04	-	11913480	11913665	186	intergenic
novel_circ_000568	Bra034321	A04	+	12257106	12257421	316	one_exon
novel_circ_000569	Bra034325	A04	+	12274834	12275201	290	annot_exons
novel_circ_000570	Bra034328	A04	-	12294967	12297249	1314	exon_intron
novel_circ_000571	Bra034338	A04	+	12369080	12369298	219	one_exon
novel_circ_000572	Bra034343	A04	-	12404042	12404266	225	one_exon
novel_circ_000573	Bra035673	A04	-	13007086	13007263	178	exon_intron
novel_circ_000574	Bra035652	A04	+	13166872	13167092	221	one_exon
novel_circ_000575	Bra021603	A04	+	13452823	13453030	208	exon_intron
novel_circ_000576	Bra021646	A04	+	13724309	13740017	15709	exon_intron
novel_circ_000577	Bra021713	A04	-	14155696	14156160	465	one_exon
novel_circ_000578	Bra021733	A04	-	14250111	14250386	276	antisense
novel_circ_000579	Bra021733	A04	-	14250210	14250386	177	antisense
novel_circ_000580	Bra021733	A04	-	14250387	14250788	402	antisense
novel_circ_000581	NA	A04	-	14666022	14667121	1100	intergenic
novel_circ_000582	Bra021810	A04	+	14741556	14741842	198	annot_exons
novel_circ_000583	Bra021874	A04	-	15073284	15073538	255	one_exon
novel_circ_000584	Bra021924	A04	-	15304218	15304403	186	antisense
novel_circ_000585	Bra017271	A04	+	15743909	15744287	379	antisense
novel_circ_000586	Bra017226	A04	-	16006368	16007196	412	annot_exons
novel_circ_000587	Bra017210	A04	-	16132205	16132405	201	one_exon
novel_circ_000588	Bra017210	A04	+	16132864	16133207	344	antisense
novel_circ_000589	NA	A04	+	16218267	16218461	195	intergenic
novel_circ_000590	Bra017121	A04	+	16613522	16614006	485	exon_intron
novel_circ_000591	Bra017076	A04	+	16888361	16888520	160	exon_intron
novel_circ_000592	Bra017049	A04	+	17020117	17021115	713	annot_exons
novel_circ_000593	Bra017049	A04	+	17020342	17021115	578	annot_exons
novel_circ_000594	Bra017049	A04	+	17020346	17021115	574	annot_exons
novel_circ_000595	Bra017019	A04	+	17208159	17208599	441	antisense
novel_circ_000596	Bra016948	A04	+	17552641	17553137	402	annot_exons
novel_circ_000597	Bra016908	A04	+	17756544	17756728	185	antisense
novel_circ_000598	Bra016868	A04	-	17922373	17923142	471	annot_exons
novel_circ_000599	Bra037739	A04	+	18048358	18051345	2988	exon_intron
novel_circ_000600	Bra037731	A04	-	18126604	18126819	216	antisense
novel_circ_000601	Bra037731	A04	-	18126640	18126819	180	antisense
novel_circ_000602	Bra037731	A04	-	18126895	18127068	174	antisense
novel_circ_000603	Bra037673	A04	+	18344489	18344622	134	antisense
novel_circ_000604	Bra039269	A04	-	18923128	18923400	273	antisense
novel_circ_000605	Bra004427	A05	+	77456	77843	388	antisense
novel_circ_000606	Bra004484	A05	-	373246	373600	355	antisense
novel_circ_000607	Bra004523	A05	+	614300	614566	267	one_exon
novel_circ_000608	Bra004633	A05	-	1149742	1150080	339	antisense
novel_circ_000609	Bra004633	A05	-	1149774	1150021	248	antisense
novel_circ_000610	Bra004642	A05	-	1190665	1191030	279	annot_exons
novel_circ_000611	Bra004645	A05	+	1200419	1202306	1888	exon_intron
novel_circ_000612	Bra004654	A05	-	1252877	1253658	548	exon_intron
novel_circ_000613	Bra004663	A05	-	1291702	1292086	303	exon_intron
novel_circ_000614	Bra004748	A05	-	1630073	1681930	49137	exon_intron
novel_circ_000615	Bra004749	A05	-	1651627	1651839	213	antisense
novel_circ_000616	Bra004749	A05	-	1652391	1652664	274	antisense
novel_circ_000617	Bra004749	A05	-	1652753	1653040	288	antisense
novel_circ_000618	Bra004749	A05	-	1652861	1653040	180	antisense
novel_circ_000619	Bra004749	A05	-	1652894	1653073	180	antisense
novel_circ_000620	Bra004776	A05	+	1796429	1796757	329	one_exon
novel_circ_000621	Bra004786	A05	-	1822495	1823343	849	antisense
novel_circ_000622	Bra004786	A05	+	1823858	1824117	260	one_exon
novel_circ_000623	Bra004817	A05	-	1940817	1941093	277	antisense
novel_circ_000624	Bra004850	A05	+	2135244	2135393	150	antisense
novel_circ_000625	Bra004916	A05	-	2472172	2472386	215	one_exon
novel_circ_000626	Bra004967	A05	+	2688628	2688788	161	one_exon
novel_circ_000627	Bra005000	A05	-	2903081	2903356	276	antisense
novel_circ_000628	Bra005016	A05	+	2988155	2989914	1760	exon_intron
novel_circ_000629	Bra005056	A05	+	3203785	3204225	356	annot_exons
novel_circ_000630	Bra005081	A05	+	3329362	3332967	3606	exon_intron
novel_circ_000631	Bra005091	A05	+	3376262	3380377	3686	exon_intron
novel_circ_000632	Bra005090	A05	-	3376262	3380377	3025	exon_intron
novel_circ_000633	Bra005097	A05	-	3407266	3407540	275	exon_intron
novel_circ_000634	Bra005099	A05	-	3412966	3413551	318	exon_intron
novel_circ_000635	Bra005104	A05	+	3443018	3443293	276	antisense
novel_circ_000636	Bra005110	A05	+	3474651	3475109	292	annot_exons
novel_circ_000637	Bra005183	A05	-	3879719	3879924	206	antisense
novel_circ_000638	Bra005222	A05	-	4103091	4103336	246	antisense
novel_circ_000639	Bra005264	A05	-	4373252	4373451	200	antisense
novel_circ_000640	NA	A05	+	4546268	4546507	240	intergenic
novel_circ_000641	NA	A05	-	4604153	4609344	5192	intergenic
novel_circ_000642	NA	A05	-	4604341	4609743	5403	intergenic
novel_circ_000643	NA	A05	-	4604498	4609923	5426	intergenic
novel_circ_000644	NA	A05	+	4604500	4609925	5426	intergenic
novel_circ_000645	Bra005310	A05	+	4726594	4726855	262	antisense
novel_circ_000646	Bra005312	A05	+	4752962	4753386	425	one_exon
novel_circ_000647	Bra005457	A05	-	5586794	5592063	5270	antisense
novel_circ_000648	Bra005543	A05	-	6134407	6134613	207	antisense
novel_circ_000649	Bra005575	A05	+	6291050	6291510	461	antisense
novel_circ_000650	Bra018250	A05	+	6933676	6934099	424	antisense
novel_circ_000651	Bra018255	A05	-	6967618	6970769	2379	exon_intron
novel_circ_000652	NA	A05	-	7376997	7377164	168	intergenic
novel_circ_000653	NA	A05	+	7376997	7377164	168	intergenic
novel_circ_000654	Bra018311	A05	+	7378397	7378647	251	exon_intron
novel_circ_000655	Bra018311	A05	+	7380197	7380361	165	one_exon
novel_circ_000656	Bra018346	A05	-	7632986	7633586	601	one_exon
novel_circ_000657	Bra018351	A05	-	7701192	7701436	245	one_exon
novel_circ_000658	Bra018369	A05	-	7807901	7808116	216	one_exon
novel_circ_000659	Bra018403	A05	+	7992435	8001935	9501	exon_intron
novel_circ_000660	Bra018468	A05	+	8352752	8352949	198	antisense
novel_circ_000661	NA	A05	+	9052218	9052799	582	intergenic
novel_circ_000662	Bra037098	A05	+	9406441	9409351	2911	antisense
novel_circ_000663	Bra037098	A05	-	9406441	9409351	2911	exon_intron
novel_circ_000664	Bra021322	A05	-	9525788	9526105	318	one_exon
novel_circ_000665	Bra021323	A05	+	9567853	9568018	166	antisense
novel_circ_000666	NA	A05	-	9663698	9668668	4971	intergenic
novel_circ_000667	NA	A05	-	9702424	9707292	4869	intergenic
novel_circ_000668	NA	A05	+	10069392	10074529	5138	intergenic
novel_circ_000669	NA	A05	-	10069392	10074529	5138	intergenic
novel_circ_000670	Bra030402	A05	-	10990414	10991085	672	antisense
novel_circ_000671	Bra030402	A05	-	10990918	10991085	168	antisense
novel_circ_000672	Bra030404	A05	+	11010550	11010755	206	exon_intron
novel_circ_000673	Bra030429	A05	-	11246377	11246724	348	antisense
novel_circ_000674	Bra032207	A05	-	13026735	13030608	3007	exon_intron
novel_circ_000675	Bra032207	A05	-	13026924	13030608	2818	exon_intron
novel_circ_000676	NA	A05	+	14254812	14257066	2255	intergenic
novel_circ_000677	Bra010178	A05	+	14926490	14926772	283	one_exon
novel_circ_000678	Bra010178	A05	+	14926607	14926762	156	one_exon
novel_circ_000679	Bra033844	A05	+	15282782	15283089	191	annot_exons
novel_circ_000680	Bra033849	A05	-	15385629	15385923	295	antisense
novel_circ_000681	NA	A05	+	16266240	16267457	1218	intergenic
novel_circ_000682	NA	A05	-	16266240	16267457	1218	intergenic
novel_circ_000683	Bra040830	A05	+	16285080	16285209	130	one_exon
novel_circ_000684	Bra040834	A05	-	16295124	16295413	290	one_exon
novel_circ_000685	Bra039954	A05	-	16396775	16397146	372	exon_intron
novel_circ_000686	Bra039954	A05	-	16396775	16398138	680	exon_intron
novel_circ_000687	Bra039947	A05	-	16504819	16505221	403	one_exon
novel_circ_000688	Bra039947	A05	-	16507526	16507826	301	one_exon
novel_circ_000689	Bra039947	A05	-	16507577	16508317	581	annot_exons
novel_circ_000690	Bra039947	A05	-	16508429	16508591	163	one_exon
novel_circ_000691	Bra031348	A05	+	16546754	16547017	264	antisense
novel_circ_000692	NA	A05	+	16645029	16645164	136	intergenic
novel_circ_000693	Bra031329	A05	-	16678699	16679120	422	antisense
novel_circ_000694	Bra031329	A05	-	16678884	16679114	231	antisense
novel_circ_000695	Bra031329	A05	-	16678899	16679087	189	antisense
novel_circ_000696	Bra031329	A05	-	16678908	16679114	207	antisense
novel_circ_000697	Bra031329	A05	-	16678908	16679120	213	antisense
novel_circ_000698	Bra031329	A05	-	16678932	16679114	183	antisense
novel_circ_000699	Bra031329	A05	-	16678947	16679120	174	antisense
novel_circ_000700	Bra031245	A05	+	17439864	17440124	261	antisense
novel_circ_000701	Bra035746	A05	+	17614893	17615158	266	one_exon
novel_circ_000702	Bra035800	A05	-	17989703	17990074	372	antisense
novel_circ_000703	Bra035805	A05	-	17998742	17999128	387	one_exon
novel_circ_000704	Bra022450	A05	+	18295758	18296051	294	antisense
novel_circ_000705	Bra022384	A05	-	18750947	18751880	444	annot_exons
novel_circ_000706	Bra022381	A05	-	18783362	18783700	339	one_exon
novel_circ_000707	NA	A05	-	18960348	18967721	7374	intergenic
novel_circ_000708	Bra022290	A05	+	19311152	19318734	7583	antisense
novel_circ_000709	Bra022273	A05	+	19438963	19447623	8061	exon_intron
novel_circ_000710	Bra022233	A05	-	19626080	19639535	12568	exon_intron
novel_circ_000711	Bra022180	A05	+	19987172	19987348	177	one_exon
novel_circ_000712	Bra022171	A05	-	20039051	20039272	222	antisense
novel_circ_000713	NA	A05	+	20040777	20041181	405	intergenic
novel_circ_000714	NA	A05	+	20041049	20041710	662	intergenic
novel_circ_000715	Bra022170	A05	+	20043469	20049191	4194	exon_intron
novel_circ_000716	Bra022170	A05	+	20043877	20049599	4194	exon_intron
novel_circ_000717	Bra022170	A05	-	20044453	20050104	5652	antisense
novel_circ_000718	Bra022170	A05	+	20044453	20050104	4046	exon_intron
novel_circ_000719	Bra022161	A05	+	20132064	20132599	444	annot_exons
novel_circ_000720	NA	A05	+	20262029	20262334	306	intergenic
novel_circ_000721	Bra027197	A05	-	20348990	20349522	461	annot_exons
novel_circ_000722	Bra027209	A05	+	20441292	20441509	218	antisense
novel_circ_000723	Bra027223	A05	-	20508986	20515957	5958	exon_intron
novel_circ_000724	Bra027224	A05	-	20512036	20517760	4898	exon_intron
novel_circ_000725	Bra027257	A05	-	20688768	20688921	154	antisense
novel_circ_000726	Bra027283	A05	+	20826474	20826632	159	one_exon
novel_circ_000727	Bra027327	A05	+	21051445	21051667	223	antisense
novel_circ_000728	Bra034705	A05	-	21785686	21785847	162	antisense
novel_circ_000729	Bra034705	A05	-	21785686	21785928	243	antisense
novel_circ_000730	NA	A05	+	21986118	21986358	241	intergenic
novel_circ_000731	NA	A05	+	22076032	22078599	2568	intergenic
novel_circ_000732	Bra034777	A05	+	22102503	22102758	256	one_exon
novel_circ_000733	Bra034805	A05	+	22232090	22232479	390	one_exon
novel_circ_000734	Bra034808	A05	-	22243939	22244614	676	antisense
novel_circ_000735	Bra034822	A05	-	22307370	22307557	188	antisense
novel_circ_000736	Bra034829	A05	+	22349620	22350317	530	annot_exons
novel_circ_000737	Bra034841	A05	-	22394087	22394266	180	antisense
novel_circ_000738	Bra029870	A05	-	22650581	22650837	257	one_exon
novel_circ_000739	Bra029862	A05	-	22688010	22688233	224	antisense
novel_circ_000740	Bra029794	A05	-	22979248	22979488	241	one_exon
novel_circ_000741	Bra029753	A05	-	23138937	23139595	659	antisense
novel_circ_000742	Bra029739	A05	-	23187786	23188025	240	one_exon
novel_circ_000743	Bra029718	A05	-	23256854	23259089	2236	exon_intron
novel_circ_000744	Bra029718	A05	+	23256854	23259089	2236	antisense
novel_circ_000745	Bra029717	A05	+	23259836	23266055	4761	exon_intron
novel_circ_000746	Bra029651	A05	-	23533555	23533765	211	one_exon
novel_circ_000747	Bra029604	A05	+	23767779	23767959	181	antisense
novel_circ_000748	Bra020748	A05	-	23949080	23949449	370	antisense
novel_circ_000749	Bra020752	A05	-	23970772	23971178	407	antisense
novel_circ_000750	NA	A05	-	23999506	24004232	4727	intergenic
novel_circ_000751	Bra020801	A05	+	24172926	24173165	240	one_exon
novel_circ_000752	Bra031967	A05	-	24593304	24593722	334	annot_exons
novel_circ_000753	Bra031967	A05	-	24593467	24593714	248	one_exon
novel_circ_000754	Bra031967	A05	-	24593467	24593720	254	one_exon
novel_circ_000755	Bra031967	A05	-	24593467	24593722	256	one_exon
novel_circ_000756	Bra032022	A05	-	24845019	24845281	263	one_exon
novel_circ_000757	Bra032022	A05	-	24848543	24848693	151	one_exon
novel_circ_000758	Bra039172	A05	-	25000736	25000882	147	one_exon
novel_circ_000759	Bra039152	A05	+	25106310	25110562	4102	exon_intron
novel_circ_000760	Bra039144	A05	-	25143271	25143417	147	exon_intron
novel_circ_000761	Bra039140	A05	-	25158180	25158329	150	one_exon
novel_circ_000762	Bra039124	A05	+	25215029	25215314	286	antisense
novel_circ_000763	Bra037982	A06	-	299893	300405	513	antisense
novel_circ_000764	Bra039691	A06	-	518140	518342	203	antisense
novel_circ_000765	Bra018991	A06	-	863513	863846	334	one_exon
novel_circ_000766	Bra018963	A06	+	1009456	1009638	183	antisense
novel_circ_000767	Bra018851	A06	-	1616291	1617811	1016	annot_exons
novel_circ_000768	Bra018836	A06	-	1696152	1696374	223	antisense
novel_circ_000769	Bra018835	A06	+	1704172	1708911	4740	exon_intron
novel_circ_000770	Bra018828	A06	+	1748126	1748299	174	one_exon
novel_circ_000771	Bra018808	A06	-	1830592	1832468	1877	exon_intron
novel_circ_000772	Bra018806	A06	-	1838105	1855480	12030	exon_intron
novel_circ_000773	Bra018805	A06	+	1844450	1870581	24989	exon_intron
novel_circ_000774	Bra018744	A06	-	2238868	2239660	793	antisense
novel_circ_000775	Bra018677	A06	-	2679389	2679896	508	antisense
novel_circ_000776	Bra018656	A06	-	2797060	2797361	302	antisense
novel_circ_000777	Bra018606	A06	+	3028008	3028175	168	antisense
novel_circ_000778	Bra018581	A06	-	3142921	3143138	118	annot_exons
novel_circ_000779	Bra019996	A06	-	3345630	3345812	183	one_exon
novel_circ_000780	Bra019981	A06	+	3406988	3407374	387	antisense
novel_circ_000781	Bra019874	A06	-	3934004	3939439	5436	exon_intron
novel_circ_000782	Bra019874	A06	+	3934004	3939439	5436	antisense
novel_circ_000783	Bra019865	A06	-	3972779	3978903	5870	exon_intron
novel_circ_000784	Bra019866	A06	+	3972779	3978903	5684	exon_intron
novel_circ_000785	Bra019865	A06	-	3972864	3978914	5796	exon_intron
novel_circ_000786	Bra019850	A06	-	4028786	4028966	181	one_exon
novel_circ_000787	Bra019850	A06	+	4028793	4029058	266	antisense
novel_circ_000788	Bra019850	A06	+	4028808	4028999	192	antisense
novel_circ_000789	Bra019850	A06	-	4028808	4028999	192	one_exon
novel_circ_000790	Bra019850	A06	+	4028841	4029112	272	antisense
novel_circ_000791	Bra019850	A06	+	4028844	4029024	181	antisense
novel_circ_000792	Bra019850	A06	-	4028844	4029062	219	one_exon
novel_circ_000793	Bra019850	A06	+	4028844	4029277	434	antisense
novel_circ_000794	Bra019826	A06	+	4169138	4169389	252	one_exon
novel_circ_000795	Bra019820	A06	+	4240365	4246807	6443	exon_intron
novel_circ_000796	Bra019820	A06	+	4240369	4246811	6443	exon_intron
novel_circ_000797	Bra019784	A06	+	4430992	4431173	182	antisense
novel_circ_000798	Bra019784	A06	-	4430992	4431173	182	one_exon
novel_circ_000799	NA	A06	+	4810995	4811429	435	intergenic
novel_circ_000800	Bra019689	A06	+	4969794	4986298	14463	exon_intron
novel_circ_000801	NA	A06	+	5338863	5339053	191	intergenic
novel_circ_000802	Bra026194	A06	+	5358937	5359261	325	antisense
novel_circ_000803	Bra026192	A06	+	5370316	5370874	559	antisense
novel_circ_000804	Bra026192	A06	-	5370321	5370842	522	one_exon
novel_circ_000805	Bra026192	A06	-	5370500	5370837	338	one_exon
novel_circ_000806	Bra026192	A06	-	5370610	5370934	325	exon_intron
novel_circ_000807	Bra026187	A06	+	5391014	5391227	214	antisense
novel_circ_000808	Bra026108	A06	-	5786689	5794647	7342	exon_intron
novel_circ_000809	Bra026106	A06	-	5787456	5795472	7146	exon_intron
novel_circ_000810	Bra026106	A06	+	5787456	5795472	8017	antisense
novel_circ_000811	Bra026106	A06	-	5787461	5795477	7146	exon_intron
novel_circ_000812	Bra026106	A06	+	5787461	5795477	8017	antisense
novel_circ_000813	Bra026106	A06	-	5788454	5796305	6880	exon_intron
novel_circ_000814	Bra026106	A06	-	5789107	5796780	6521	exon_intron
novel_circ_000815	Bra026106	A06	-	5789245	5796780	6383	exon_intron
novel_circ_000816	Bra026106	A06	+	5793663	5799284	5622	antisense
novel_circ_000817	Bra026106	A06	-	5793816	5799272	2361	annot_exons
novel_circ_000818	Bra026105	A06	-	5804118	5814629	8050	exon_intron
novel_circ_000819	Bra026105	A06	-	5804839	5814888	8007	exon_intron
novel_circ_000820	Bra026105	A06	-	5804839	5817197	917	annot_exons
novel_circ_000821	Bra026105	A06	+	5805107	5806480	1374	antisense
novel_circ_000822	Bra026105	A06	+	5805820	5815803	9984	antisense
novel_circ_000823	Bra026084	A06	+	5912546	5912845	300	antisense
novel_circ_000824	Bra026009	A06	-	6243037	6243210	174	one_exon
novel_circ_000825	Bra025982	A06	+	6352882	6353414	338	annot_exons
novel_circ_000826	Bra025975	A06	-	6395223	6396330	864	exon_intron
novel_circ_000827	Bra025961	A06	-	6443358	6444011	654	antisense
novel_circ_000828	Bra025951	A06	+	6505893	6515943	2019	annot_exons
novel_circ_000829	Bra025949	A06	-	6530801	6540956	10156	antisense
novel_circ_000830	NA	A06	+	6533301	6534349	1049	intergenic
novel_circ_000831	Bra025932	A06	-	6628106	6631204	3099	intronic
novel_circ_000832	Bra025917	A06	+	6710295	6710617	323	exon_intron
novel_circ_000833	Bra025911	A06	+	6751140	6751736	597	exon_intron
novel_circ_000834	Bra025683	A06	+	6985872	6986423	552	one_exon
novel_circ_000835	Bra025683	A06	-	6985872	6986423	552	antisense
novel_circ_000836	Bra025703	A06	+	7101521	7101925	405	one_exon
novel_circ_000837	Bra025713	A06	-	7151880	7152362	483	antisense
novel_circ_000838	Bra025717	A06	-	7166835	7170179	3014	exon_intron
novel_circ_000839	Bra025717	A06	+	7166845	7170189	3345	antisense
novel_circ_000840	Bra025720	A06	+	7174419	7175042	624	antisense
novel_circ_000841	Bra025777	A06	-	7632386	7632635	250	one_exon
novel_circ_000842	Bra025805	A06	-	7803588	7808589	5002	intronic
novel_circ_000843	Bra025819	A06	-	7930897	7931263	367	one_exon
novel_circ_000844	Bra025819	A06	-	7930899	7931261	363	one_exon
novel_circ_000845	Bra025819	A06	-	7930900	7931235	336	one_exon
novel_circ_000846	Bra025819	A06	-	7930973	7931264	292	one_exon
novel_circ_000847	Bra025819	A06	-	7931100	7931287	188	one_exon
novel_circ_000848	Bra025827	A06	+	7970100	7970620	521	antisense
novel_circ_000849	Bra025862	A06	+	8246469	8246651	183	one_exon
novel_circ_000850	NA	A06	+	8260995	8261197	203	intergenic
novel_circ_000851	Bra025863	A06	+	8264474	8264680	207	one_exon
novel_circ_000852	Bra025874	A06	-	8338532	8341565	2946	exon_intron
novel_circ_000853	Bra025889	A06	+	8442795	8443019	225	antisense
novel_circ_000854	NA	A06	-	8676465	8676834	370	intergenic
novel_circ_000855	Bra017940	A06	-	8680308	8680539	232	antisense
novel_circ_000856	Bra017969	A06	-	8862352	8891572	27244	exon_intron
novel_circ_000857	Bra017966	A06	+	8862352	8891572	28447	exon_intron
novel_circ_000858	Bra017971	A06	-	8892392	8892712	321	antisense
novel_circ_000859	Bra018030	A06	+	9338305	9338532	228	one_exon
novel_circ_000860	Bra018030	A06	+	9341468	9341680	213	exon_intron
novel_circ_000861	NA	A06	+	9690253	9690647	395	intergenic
novel_circ_000862	Bra018085	A06	+	9838059	9838241	183	one_exon
novel_circ_000863	Bra018137	A06	-	10223553	10223830	278	one_exon
novel_circ_000864	Bra018137	A06	+	10223733	10223989	257	antisense
novel_circ_000865	Bra018185	A06	+	10597958	10598155	198	one_exon
novel_circ_000866	Bra018204	A06	+	10739592	10739922	331	antisense
novel_circ_000867	Bra038281	A06	-	11113892	11114192	204	exon_intron
novel_circ_000868	Bra038296	A06	-	11280942	11281427	486	antisense
novel_circ_000869	Bra038299	A06	+	11307077	11307471	319	annot_exons
novel_circ_000870	Bra019416	A06	+	11410415	11499408	87976	exon_intron
novel_circ_000871	Bra019431	A06	-	11624140	11624583	310	annot_exons
novel_circ_000872	Bra019435	A06	+	11701538	11726686	24848	exon_intron
novel_circ_000873	Bra019435	A06	+	11705147	11725634	20187	exon_intron
novel_circ_000874	Bra019468	A06	-	12222041	12222228	188	one_exon
novel_circ_000875	NA	A06	-	12449048	12455222	6175	intergenic
novel_circ_000876	NA	A06	-	12642284	12642987	704	intergenic
novel_circ_000877	NA	A06	+	12642290	12642465	176	intergenic
novel_circ_000878	NA	A06	+	12642717	12643244	528	intergenic
novel_circ_000879	NA	A06	+	12642717	12643420	704	intergenic
novel_circ_000880	Bra019613	A06	+	13724959	13725123	165	antisense
novel_circ_000881	Bra019621	A06	-	13777244	13777551	308	antisense
novel_circ_000882	Bra010049	A06	+	13867312	13867601	290	exon_intron
novel_circ_000883	Bra010070	A06	+	14152690	14153016	327	one_exon
novel_circ_000884	Bra010070	A06	+	14152693	14153016	324	one_exon
novel_circ_000885	Bra010070	A06	+	14152696	14153016	321	one_exon
novel_circ_000886	Bra010075	A06	+	14200936	14201364	429	one_exon
novel_circ_000887	Bra010096	A06	+	14377928	14378303	376	exon_intron
novel_circ_000888	Bra010106	A06	+	14431315	14431616	302	antisense
novel_circ_000889	Bra010108	A06	+	14450742	14450990	249	antisense
novel_circ_000890	Bra010108	A06	+	14450781	14450990	210	antisense
novel_circ_000891	Bra010108	A06	+	14450793	14450987	195	antisense
novel_circ_000892	Bra010108	A06	+	14450793	14450990	198	antisense
novel_circ_000893	Bra010108	A06	+	14450793	14450993	201	antisense
novel_circ_000894	Bra010108	A06	+	14451335	14451511	177	antisense
novel_circ_000895	Bra010111	A06	-	14467823	14468062	240	exon_intron
novel_circ_000896	Bra010124	A06	+	14556407	14556672	266	one_exon
novel_circ_000897	NA	A06	-	15119823	15121193	1371	intergenic
novel_circ_000898	NA	A06	+	15119828	15121198	1371	intergenic
novel_circ_000899	NA	A06	-	15257375	15257832	458	intergenic
novel_circ_000900	Bra024295	A06	-	15388547	15388866	320	one_exon
novel_circ_000901	Bra024369	A06	-	15874587	15875411	733	exon_intron
novel_circ_000902	Bra024404	A06	-	16170746	16170886	141	antisense
novel_circ_000903	Bra024428	A06	+	16360545	16360761	217	one_exon
novel_circ_000904	Bra024428	A06	+	16360551	16360761	211	one_exon
novel_circ_000905	Bra024449	A06	+	16441647	16442075	429	antisense
novel_circ_000906	Bra024449	A06	-	16441693	16441884	192	one_exon
novel_circ_000907	NA	A06	-	16930065	16931755	1691	intergenic
novel_circ_000908	Bra009659	A06	+	17040888	17041108	221	exon_intron
novel_circ_000909	Bra009686	A06	+	17169871	17170131	261	antisense
novel_circ_000910	Bra009709	A06	-	17295994	17296638	645	antisense
novel_circ_000911	Bra009709	A06	+	17295994	17296638	166	annot_exons
novel_circ_000912	Bra009712	A06	-	17320738	17321127	390	antisense
novel_circ_000913	Bra009764	A06	+	17693732	17709514	15783	antisense
novel_circ_000914	Bra009774	A06	-	17790477	17790676	200	exon_intron
novel_circ_000915	Bra009915	A06	+	18677880	18678239	360	one_exon
novel_circ_000916	Bra009915	A06	+	18677883	18678239	357	one_exon
novel_circ_000917	Bra010032	A06	-	19359867	19361869	1153	exon_intron
novel_circ_000918	Bra010138	A06	+	19434296	19523209	88516	exon_intron
novel_circ_000919	Bra010149	A06	+	19760934	19848197	87146	exon_intron
novel_circ_000920	Bra010149	A06	-	19760934	19848197	87264	antisense
novel_circ_000921	Bra010149	A06	+	19760934	19857277	96226	exon_intron
novel_circ_000922	Bra010149	A06	-	19760934	19857277	96344	antisense
novel_circ_000923	Bra010149	A06	-	19760938	19857343	96406	antisense
novel_circ_000924	Bra010149	A06	-	19785913	19848197	62285	antisense
novel_circ_000925	Bra010149	A06	-	19785913	19857277	71365	antisense
novel_circ_000926	Bra010149	A06	+	19785913	19857277	71247	exon_intron
novel_circ_000927	Bra010149	A06	+	19785917	19848242	62208	exon_intron
novel_circ_000928	Bra010149	A06	+	19785918	19848243	62208	exon_intron
novel_circ_000929	Bra010149	A06	+	19785928	19848222	62177	exon_intron
novel_circ_000930	Bra010149	A06	+	19785928	19857302	71257	exon_intron
novel_circ_000931	Bra010149	A06	+	19785936	19857750	71697	exon_intron
novel_circ_000932	Bra010149	A06	+	19785936	19858149	72096	exon_intron
novel_circ_000933	Bra010149	A06	+	19785936	19858548	72495	exon_intron
novel_circ_000934	Bra010149	A06	+	19785936	19858947	72894	exon_intron
novel_circ_000935	Bra010149	A06	+	19785936	19859346	73293	exon_intron
novel_circ_000936	Bra010149	A06	+	19785936	19859745	73692	exon_intron
novel_circ_000937	Bra010149	A06	-	19785936	19859745	73810	antisense
novel_circ_000938	Bra010149	A06	+	19785936	19860144	74091	exon_intron
novel_circ_000939	Bra010149	A06	+	19785938	19848263	62208	exon_intron
novel_circ_000940	NA	A06	-	19785944	19793145	7202	intergenic
novel_circ_000941	Bra010149	A06	+	19785949	19848222	62156	exon_intron
novel_circ_000942	Bra010149	A06	+	19785949	19857250	71184	exon_intron
novel_circ_000943	NA	A06	-	19887248	19900707	13460	intergenic
novel_circ_000944	NA	A06	-	19887823	19893967	6145	intergenic
novel_circ_000945	NA	A06	-	19888063	19894344	6282	intergenic
novel_circ_000946	NA	A06	+	19899138	19933196	34059	intergenic
novel_circ_000947	Bra037449	A06	+	20127430	20142230	14581	exon_intron
novel_circ_000948	Bra037452	A06	+	20127430	20173766	46337	exon_intron
novel_circ_000949	Bra037452	A06	+	20127940	20163277	35338	exon_intron
novel_circ_000950	Bra037451	A06	-	20127940	20163277	34674	exon_intron
novel_circ_000951	Bra037451	A06	-	20131115	20146183	14405	exon_intron
novel_circ_000952	Bra037451	A06	-	20131115	20146359	14581	exon_intron
novel_circ_000953	Bra037449	A06	+	20131115	20146359	15025	exon_intron
novel_circ_000954	Bra037449	A06	+	20131115	20146535	15201	exon_intron
novel_circ_000955	Bra037451	A06	-	20131536	20146249	14050	exon_intron
novel_circ_000956	Bra037449	A06	+	20131536	20146249	14494	exon_intron
novel_circ_000957	Bra037451	A06	-	20131536	20146425	14226	exon_intron
novel_circ_000958	Bra037449	A06	+	20131536	20146425	14670	exon_intron
novel_circ_000959	Bra037449	A06	+	20131595	20146290	14476	exon_intron
novel_circ_000960	Bra037451	A06	-	20131595	20146466	14208	exon_intron
novel_circ_000961	Bra037449	A06	+	20131595	20146466	14652	exon_intron
novel_circ_000962	Bra037449	A06	+	20131595	20146642	14828	exon_intron
novel_circ_000963	Bra037451	A06	-	20131595	20146642	14384	exon_intron
novel_circ_000964	Bra037449	A06	+	20131598	20146310	14493	exon_intron
novel_circ_000965	Bra037449	A06	+	20131598	20146486	14669	exon_intron
novel_circ_000966	Bra037449	A06	+	20131957	20146310	14134	exon_intron
novel_circ_000967	Bra037449	A06	+	20131957	20146486	14310	exon_intron
novel_circ_000968	Bra037449	A06	+	20131957	20146662	14486	exon_intron
novel_circ_000969	Bra037451	A06	-	20132279	20143752	10810	exon_intron
novel_circ_000970	Bra037451	A06	-	20132279	20143831	10889	exon_intron
novel_circ_000971	Bra037451	A06	-	20132279	20143888	10946	exon_intron
novel_circ_000972	Bra037451	A06	-	20132279	20163957	31015	exon_intron
novel_circ_000973	NA	A06	+	20146487	20146662	176	intergenic
novel_circ_000974	Bra037489	A06	-	20325846	20326247	402	exon_intron
novel_circ_000975	Bra037489	A06	+	20326038	20326242	205	antisense
novel_circ_000976	Bra037520	A06	+	20456601	20456859	259	antisense
novel_circ_000977	Bra025421	A06	-	20539670	20540878	1209	antisense
novel_circ_000978	Bra025330	A06	-	21047434	21057763	9303	exon_intron
novel_circ_000979	Bra025331	A06	+	21047447	21057776	9385	exon_intron
novel_circ_000980	Bra025326	A06	-	21086391	21086770	380	antisense
novel_circ_000981	Bra025323	A06	-	21098101	21098308	208	one_exon
novel_circ_000982	Bra025323	A06	-	21098175	21098309	135	one_exon
novel_circ_000983	Bra025323	A06	+	21098175	21098309	135	antisense
novel_circ_000984	Bra025266	A06	-	21418924	21419782	611	exon_intron
novel_circ_000985	Bra025211	A06	-	21665802	21666117	316	antisense
novel_circ_000986	Bra025211	A06	+	21666175	21666387	213	one_exon
novel_circ_000987	Bra025173	A06	-	21877326	21877732	407	one_exon
novel_circ_000988	Bra025136	A06	-	22218288	22218511	224	intronic
novel_circ_000989	Bra025136	A06	-	22218288	22218681	394	intronic
novel_circ_000990	Bra025136	A06	-	22218288	22219283	996	exon_intron
novel_circ_000991	Bra025136	A06	-	22218288	22219538	1251	exon_intron
novel_circ_000992	Bra025136	A06	-	22218440	22219538	1099	exon_intron
novel_circ_000993	Bra025136	A06	-	22219026	22219538	513	exon_intron
novel_circ_000994	NA	A06	-	22480974	22485310	4337	intergenic
novel_circ_000995	NA	A06	+	22480974	22485310	4337	intergenic
novel_circ_000996	NA	A06	+	22838679	22838829	151	intergenic
novel_circ_000997	NA	A06	-	22885977	22886170	194	intergenic
novel_circ_000998	Bra024865	A06	-	22899250	22899452	203	antisense
novel_circ_000999	NA	A06	-	22961355	22962406	1052	intergenic
novel_circ_001000	Bra024879	A06	-	22982167	22982586	420	exon_intron
novel_circ_001001	Bra024879	A06	-	22982199	22982436	238	exon_intron
novel_circ_001002	Bra024879	A06	-	22982423	22982845	309	annot_exons
novel_circ_001003	Bra024879	A06	-	22982451	22982854	290	annot_exons
novel_circ_001004	Bra024879	A06	+	22982451	22982854	404	antisense
novel_circ_001005	Bra024899	A06	+	23109526	23109796	271	antisense
novel_circ_001006	Bra024912	A06	-	23160199	23160379	181	one_exon
novel_circ_001007	Bra024912	A06	+	23162060	23162590	531	antisense
novel_circ_001008	Bra024951	A06	-	23297430	23297692	263	exon_intron
novel_circ_001009	Bra024968	A06	+	23399112	23399432	218	annot_exons
novel_circ_001010	Bra025042	A06	+	23784191	23784530	340	antisense
novel_circ_001011	Bra025104	A06	+	24115385	24115706	231	annot_exons
novel_circ_001012	Bra033742	A06	-	24248759	24254708	5950	antisense
novel_circ_001013	Bra033724	A06	-	24355190	24355582	393	one_exon
novel_circ_001014	Bra033662	A06	-	24693941	24694137	197	antisense
novel_circ_001015	Bra033662	A06	+	24693941	24694137	197	one_exon
novel_circ_001016	Bra033651	A06	+	24747029	24747237	209	exon_intron
novel_circ_001017	Bra033559	A06	+	25177026	25177493	383	annot_exons
novel_circ_001018	Bra036480	A07	+	157359	157673	315	one_exon
novel_circ_001019	Bra039009	A07	-	661033	665142	3527	exon_intron
novel_circ_001020	NA	A07	-	735434	736172	739	intergenic
novel_circ_001021	Bra038842	A07	-	928033	928409	377	one_exon
novel_circ_001022	Bra038835	A07	-	986219	986531	225	annot_exons
novel_circ_001023	Bra038830	A07	+	1054126	1054360	235	one_exon
novel_circ_001024	Bra039619	A07	+	1498652	1499402	751	antisense
novel_circ_001025	NA	A07	-	2264460	2265200	741	intergenic
novel_circ_001026	NA	A07	+	2264460	2265200	741	intergenic
novel_circ_001027	NA	A07	-	2264524	2265054	531	intergenic
novel_circ_001028	NA	A07	-	2264524	2265126	603	intergenic
novel_circ_001029	NA	A07	-	2264529	2265054	526	intergenic
novel_circ_001030	NA	A07	-	2264529	2265105	577	intergenic
novel_circ_001031	NA	A07	-	2264529	2265126	598	intergenic
novel_circ_001032	Bra001980	A07	-	2887653	2888105	453	antisense
novel_circ_001033	NA	A07	-	3407693	3412706	5014	intergenic
novel_circ_001034	NA	A07	+	3591428	3591603	176	intergenic
novel_circ_001035	NA	A07	+	3591437	3591612	176	intergenic
novel_circ_001036	NA	A07	+	4516870	4526797	9928	intergenic
novel_circ_001037	NA	A07	+	4518128	4527762	9635	intergenic
novel_circ_001038	NA	A07	-	4616148	4620668	4521	intergenic
novel_circ_001039	NA	A07	-	5026486	5028555	2070	intergenic
novel_circ_001040	Bra015102	A07	+	5690607	5690786	180	antisense
novel_circ_001041	Bra015065	A07	+	6043402	6043751	266	annot_exons
novel_circ_001042	Bra015053	A07	+	6135481	6136059	579	antisense
novel_circ_001043	Bra015053	A07	+	6135721	6135948	228	antisense
novel_circ_001044	Bra015013	A07	+	6503601	6503889	289	antisense
novel_circ_001045	Bra014893	A07	-	7699706	7699913	208	one_exon
novel_circ_001046	Bra030169	A07	-	8197970	8206808	8839	antisense
novel_circ_001047	NA	A07	-	8375962	8376936	975	intergenic
novel_circ_001048	Bra030141	A07	-	8465621	8471486	5782	exon_intron
novel_circ_001049	Bra030140	A07	+	8465621	8471486	5866	exon_intron
novel_circ_001050	Bra030102	A07	+	8771222	8771391	170	one_exon
novel_circ_001051	Bra030095	A07	-	8836155	8836420	266	antisense
novel_circ_001052	Bra030082	A07	-	8935075	8935349	275	antisense
novel_circ_001053	Bra030074	A07	-	8991417	8991794	378	one_exon
novel_circ_001054	Bra030037	A07	-	9239376	9239543	168	one_exon
novel_circ_001055	Bra012479	A07	+	9536616	9536914	299	antisense
novel_circ_001056	Bra012458	A07	-	9726428	9726695	268	exon_intron
novel_circ_001057	Bra012437	A07	-	9829045	9829317	273	one_exon
novel_circ_001058	Bra012426	A07	-	9982053	9982238	186	one_exon
novel_circ_001059	Bra012418	A07	+	10017441	10017649	209	one_exon
novel_circ_001060	Bra012418	A07	-	10017441	10017649	209	antisense
novel_circ_001061	Bra012389	A07	-	10277010	10283093	5920	exon_intron
novel_circ_001062	Bra012310	A07	-	10852541	10852697	157	one_exon
novel_circ_001063	Bra012274	A07	-	11136817	11137068	252	antisense
novel_circ_001064	Bra012274	A07	-	11137506	11137733	228	antisense
novel_circ_001065	Bra012272	A07	+	11143266	11143453	188	antisense
novel_circ_001066	Bra012268	A07	+	11180507	11180902	396	exon_intron
novel_circ_001067	Bra012238	A07	-	11368092	11369053	604	exon_intron
novel_circ_001068	Bra012223	A07	-	11442153	11454645	12015	exon_intron
novel_circ_001069	Bra012222	A07	+	11442153	11454645	10653	exon_intron
novel_circ_001070	Bra012219	A07	+	11442481	11465084	18385	exon_intron
novel_circ_001071	NA	A07	-	11602236	11604837	2602	intergenic
novel_circ_001072	NA	A07	+	11602236	11604837	2602	intergenic
novel_circ_001073	Bra012150	A07	-	11951131	11951379	249	antisense
novel_circ_001074	Bra012092	A07	+	12304527	12304845	319	antisense
novel_circ_001075	Bra012087	A07	-	12327854	12328171	318	one_exon
novel_circ_001076	NA	A07	+	12860560	12861045	486	intergenic
novel_circ_001077	Bra011981	A07	+	13013877	13014290	414	one_exon
novel_circ_001078	Bra028400	A07	+	13751636	13752105	309	exon_intron
novel_circ_001079	Bra028455	A07	+	14106846	14107514	669	antisense
novel_circ_001080	Bra028459	A07	-	14135280	14135764	288	annot_exons
novel_circ_001081	Bra028506	A07	+	14457781	14457951	171	one_exon
novel_circ_001082	Bra028523	A07	+	14546862	14547178	317	one_exon
novel_circ_001083	Bra028523	A07	+	14546867	14547181	315	one_exon
novel_circ_001084	Bra028523	A07	-	14546913	14547242	330	antisense
novel_circ_001085	Bra003127	A07	-	14762316	14762514	199	one_exon
novel_circ_001086	Bra003129	A07	-	14780812	14780997	186	antisense
novel_circ_001087	Bra003185	A07	+	15007901	15014820	6920	exon_intron
novel_circ_001088	Bra003194	A07	+	15071150	15071418	269	one_exon
novel_circ_001089	NA	A07	+	15392449	15392637	189	intergenic
novel_circ_001090	Bra003267	A07	+	15550685	15550813	129	one_exon
novel_circ_001091	Bra003288	A07	+	15681566	15683536	1514	exon_intron
novel_circ_001092	Bra003382	A07	-	16211212	16211808	597	antisense
novel_circ_001093	Bra003414	A07	+	16366893	16367231	339	exon_intron
novel_circ_001094	Bra003427	A07	-	16427982	16431340	2806	exon_intron
novel_circ_001095	NA	A07	+	16690347	16690597	251	intergenic
novel_circ_001096	Bra003504	A07	+	16787857	16788153	297	one_exon
novel_circ_001097	Bra003569	A07	+	17114247	17114587	341	antisense
novel_circ_001098	Bra003585	A07	+	17208194	17208375	182	one_exon
novel_circ_001099	Bra003588	A07	+	17231252	17231444	193	exon_intron
novel_circ_001100	Bra003615	A07	-	17365137	17365349	213	one_exon
novel_circ_001101	Bra003645	A07	+	17499040	17499429	390	exon_intron
novel_circ_001102	Bra003670	A07	-	17646677	17646970	294	antisense
novel_circ_001103	Bra003678	A07	+	17704550	17705202	480	annot_exons
novel_circ_001104	Bra003699	A07	-	17851247	17851570	324	antisense
novel_circ_001105	Bra003770	A07	+	18271991	18274774	2695	exon_intron
novel_circ_001106	Bra003785	A07	+	18324567	18324805	239	one_exon
novel_circ_001107	Bra003849	A07	+	18631463	18632621	1159	intronic
novel_circ_001108	Bra003849	A07	+	18631691	18632849	1159	intronic
novel_circ_001109	Bra003849	A07	+	18632021	18634701	2283	exon_intron
novel_circ_001110	Bra003869	A07	+	18744514	18744624	111	antisense
novel_circ_001111	Bra003965	A07	-	19280626	19280922	297	exon_intron
novel_circ_001112	Bra003967	A07	-	19288800	19289326	455	annot_exons
novel_circ_001113	Bra004022	A07	+	19647408	19648062	655	antisense
novel_circ_001114	NA	A07	+	19647775	19647936	162	intergenic
novel_circ_001115	Bra004105	A07	+	20151670	20152033	279	annot_exons
novel_circ_001116	Bra016238	A07	-	21978641	21978860	220	antisense
novel_circ_001117	Bra016234	A07	-	21995938	21996774	837	one_exon
novel_circ_001118	Bra016233	A07	-	21998181	21998438	258	one_exon
novel_circ_001119	Bra016233	A07	+	21999578	21999754	177	antisense
novel_circ_001120	Bra016230	A07	-	22011118	22011413	296	antisense
novel_circ_001121	Bra016224	A07	+	22071149	22071339	191	antisense
novel_circ_001122	Bra016127	A07	+	22581394	22581810	417	one_exon
novel_circ_001123	Bra016127	A07	-	22581458	22581682	225	antisense
novel_circ_001124	Bra016097	A07	-	22712884	22713129	246	antisense
novel_circ_001125	Bra016081	A07	-	22806498	22806688	191	antisense
novel_circ_001126	Bra016063	A07	+	22883825	22884260	436	one_exon
novel_circ_001127	Bra016063	A07	+	22883827	22884262	436	one_exon
novel_circ_001128	Bra016053	A07	+	22936445	22937316	872	antisense
novel_circ_001129	Bra015937	A07	+	23421215	23421751	537	antisense
novel_circ_001130	Bra015839	A07	-	23865003	23865207	205	one_exon
novel_circ_001131	Bra015779	A07	-	24176773	24177015	243	one_exon
novel_circ_001132	Bra015779	A07	+	24176837	24177042	206	antisense
novel_circ_001133	NA	A07	-	24273949	24274137	189	intergenic
novel_circ_001134	Bra015739	A07	-	24364146	24364345	200	antisense
novel_circ_001135	Bra015739	A07	-	24364262	24364648	387	antisense
novel_circ_001136	Bra015739	A07	-	24364268	24364648	381	antisense
novel_circ_001137	Bra015739	A07	-	24364271	24364648	378	antisense
novel_circ_001138	Bra015739	A07	+	24364275	24364655	381	one_exon
novel_circ_001139	Bra015739	A07	+	24364434	24364675	242	one_exon
novel_circ_001140	Bra015727	A07	-	24430771	24431067	297	one_exon
novel_circ_001141	Bra015723	A07	+	24443105	24449463	6359	antisense
novel_circ_001142	Bra015723	A07	+	24443109	24449463	6355	antisense
novel_circ_001143	NA	A07	+	24526437	24526625	189	intergenic
novel_circ_001144	NA	A07	+	24526472	24526636	165	intergenic
novel_circ_001145	NA	A07	-	24526472	24526636	165	intergenic
novel_circ_001146	Bra015656	A07	+	24790590	24791487	898	antisense
novel_circ_001147	Bra015654	A07	-	24819361	24819543	183	one_exon
novel_circ_001148	Bra015641	A07	+	24883141	24883361	221	one_exon
novel_circ_001149	Bra035041	A07	-	25208512	25213911	5400	antisense
novel_circ_001150	Bra035041	A07	-	25208512	25214454	5943	antisense
novel_circ_001151	Bra035041	A07	+	25210651	25213960	3310	intronic
novel_circ_001152	Bra035041	A07	-	25210651	25213960	3310	antisense
novel_circ_001153	Bra035041	A07	-	25210651	25214503	3853	antisense
novel_circ_001154	Bra035041	A07	+	25210651	25214503	3853	intronic
novel_circ_001155	Bra035052	A07	-	25255299	25255592	294	one_exon
novel_circ_001156	Bra030820	A08	+	89011	92309	233	annot_exons
novel_circ_001157	Bra030891	A08	+	580263	604874	24612	exon_intron
novel_circ_001158	Bra030945	A08	-	989167	989684	518	antisense
novel_circ_001159	Bra014346	A08	-	1491042	1491207	166	antisense
novel_circ_001160	Bra014346	A08	-	1491042	1491375	334	antisense
novel_circ_001161	Bra014286	A08	-	1929616	1951396	21781	exon_intron
novel_circ_001162	Bra014239	A08	+	2286273	2286611	223	annot_exons
novel_circ_001163	Bra014219	A08	-	2436188	2436457	270	one_exon
novel_circ_001164	Bra014110	A08	-	3369157	3403298	33318	exon_intron
novel_circ_001165	Bra014050	A08	-	4098898	4099027	130	one_exon
novel_circ_001166	Bra014043	A08	+	4187621	4187884	264	antisense
novel_circ_001167	Bra013994	A08	+	4784879	4804479	19519	exon_intron
novel_circ_001168	Bra034941	A08	+	5058160	5058382	223	one_exon
novel_circ_001169	Bra039727	A08	+	6386064	6386295	232	one_exon
novel_circ_001170	NA	A08	-	7121335	7123464	2130	intergenic
novel_circ_001171	NA	A08	-	7121338	7123467	2130	intergenic
novel_circ_001172	NA	A08	+	7121338	7123467	2130	intergenic
novel_circ_001173	NA	A08	-	7933131	7940801	7671	intergenic
novel_circ_001174	NA	A08	-	8214779	8237644	22866	intergenic
novel_circ_001175	Bra038959	A08	-	8636563	8637771	1209	exon_intron
novel_circ_001176	Bra020946	A08	-	10245699	10245851	153	one_exon
novel_circ_001177	Bra020896	A08	-	10551309	10551505	197	antisense
novel_circ_001178	Bra020836	A08	+	10988777	10989292	516	one_exon
novel_circ_001179	Bra020821	A08	+	11104299	11104536	238	antisense
novel_circ_001180	Bra020819	A08	+	11116675	11117309	466	annot_exons
novel_circ_001181	Bra034648	A08	-	11516743	11517030	288	antisense
novel_circ_001182	Bra034609	A08	+	11764975	11765253	279	one_exon
novel_circ_001183	NA	A08	+	11782212	11782439	228	intergenic
novel_circ_001184	Bra034600	A08	-	11804625	11804849	225	one_exon
novel_circ_001185	Bra034573	A08	-	11981345	11981609	265	exon_intron
novel_circ_001186	Bra034546	A08	+	12101813	12102194	300	annot_exons
novel_circ_001187	Bra040085	A08	+	12264092	12267656	3565	antisense
novel_circ_001188	Bra010293	A08	-	12912884	12913108	225	antisense
novel_circ_001189	Bra010293	A08	+	12912884	12913108	225	one_exon
novel_circ_001190	Bra010318	A08	-	13073643	13074026	384	antisense
novel_circ_001191	Bra010318	A08	-	13073648	13074031	384	antisense
novel_circ_001192	Bra010400	A08	-	13552042	13565170	13129	exon_intron
novel_circ_001193	Bra010402	A08	+	13571575	13571904	330	one_exon
novel_circ_001194	Bra010419	A08	-	13657500	13658329	679	annot_exons
novel_circ_001195	Bra010459	A08	-	13843181	13843738	558	one_exon
novel_circ_001196	Bra010459	A08	+	13844740	13845030	291	antisense
novel_circ_001197	Bra010510	A08	+	14141882	14142154	273	one_exon
novel_circ_001198	Bra010513	A08	-	14159194	14159494	205	annot_exons
novel_circ_001199	Bra010528	A08	+	14214451	14214833	383	antisense
novel_circ_001200	Bra010528	A08	+	14214521	14214833	313	antisense
novel_circ_001201	Bra010528	A08	+	14214524	14214814	291	antisense
novel_circ_001202	Bra010528	A08	-	14214528	14214818	291	one_exon
novel_circ_001203	Bra010532	A08	+	14234782	14235014	233	exon_intron
novel_circ_001204	Bra010569	A08	-	14460580	14460789	210	one_exon
novel_circ_001205	NA	A08	-	14508951	14509295	345	intergenic
novel_circ_001206	Bra010585	A08	-	14555354	14556769	1416	exon_intron
novel_circ_001207	Bra010727	A08	-	15369171	15369350	180	antisense
novel_circ_001208	Bra010748	A08	+	15463899	15464223	325	exon_intron
novel_circ_001209	Bra010782	A08	-	15641572	15647319	5748	exon_intron
novel_circ_001210	Bra010786	A08	+	15670412	15670646	235	one_exon
novel_circ_001211	Bra010810	A08	+	15791602	15791786	185	antisense
novel_circ_001212	Bra010816	A08	+	15820724	15830514	6277	exon_intron
novel_circ_001213	Bra010817	A08	+	15826243	15833254	7012	exon_intron
novel_circ_001214	Bra010817	A08	-	15831256	15840603	9348	antisense
novel_circ_001215	Bra010817	A08	+	15831827	15841012	3061	exon_intron
novel_circ_001216	Bra010830	A08	+	15898157	15899728	1103	annot_exons
novel_circ_001217	NA	A08	-	16027029	16029094	2066	intergenic
novel_circ_001218	NA	A08	-	16029660	16030736	1077	intergenic
novel_circ_001219	Bra010865	A08	-	16062373	16062935	326	exon_intron
novel_circ_001220	Bra010875	A08	+	16112449	16113189	741	antisense
novel_circ_001221	Bra010876	A08	-	16121336	16121788	453	antisense
novel_circ_001222	Bra010878	A08	+	16127378	16127587	210	one_exon
novel_circ_001223	Bra010879	A08	+	16132709	16132887	179	antisense
novel_circ_001224	Bra010951	A08	+	16468748	16474384	5220	exon_intron
novel_circ_001225	Bra011004	A08	+	16777089	16780027	2272	exon_intron
novel_circ_001226	Bra011004	A08	-	16777089	16780027	2939	antisense
novel_circ_001227	Bra011009	A08	+	16796015	16796364	350	antisense
novel_circ_001228	Bra011009	A08	+	16796249	16796398	150	antisense
novel_circ_001229	Bra011019	A08	-	16828482	16828691	210	antisense
novel_circ_001230	Bra011019	A08	-	16828482	16828708	227	antisense
novel_circ_001231	Bra016402	A08	+	17513397	17513696	300	antisense
novel_circ_001232	Bra016413	A08	+	17567837	17568779	943	antisense
novel_circ_001233	Bra016416	A08	-	17580540	17580719	180	antisense
novel_circ_001234	Bra016439	A08	-	17709702	17709999	298	one_exon
novel_circ_001235	Bra016439	A08	+	17709778	17710056	279	antisense
novel_circ_001236	Bra016444	A08	-	17729879	17730385	507	one_exon
novel_circ_001237	Bra016463	A08	-	17819927	17820114	188	antisense
novel_circ_001238	Bra016463	A08	+	17819927	17820114	188	one_exon
novel_circ_001239	Bra016476	A08	+	17875681	17876032	352	antisense
novel_circ_001240	Bra016589	A08	-	18405673	18405895	223	intronic
novel_circ_001241	Bra016669	A08	-	18727214	18727923	710	antisense
novel_circ_001242	Bra016747	A08	-	19023682	19023883	202	one_exon
novel_circ_001243	Bra030755	A08	-	19711557	19711730	174	one_exon
novel_circ_001244	NA	A08	+	19953285	19955371	2087	intergenic
novel_circ_001245	Bra030679	A08	+	20070359	20070570	212	one_exon
novel_circ_001246	Bra030679	A08	-	20070365	20070676	312	antisense
novel_circ_001247	Bra030586	A08	+	20432966	20433437	472	antisense
novel_circ_001248	Bra030561	A08	-	20542423	20542756	334	antisense
novel_circ_001249	NA	A08	+	20589571	20590505	935	intergenic
novel_circ_001250	Bra030526	A08	+	20688028	20688209	182	one_exon
novel_circ_001251	NA	A09	+	821	1041	221	intergenic
novel_circ_001252	Bra037368	A09	-	299770	299956	187	antisense
novel_circ_001253	Bra037401	A09	+	436876	437231	356	one_exon
novel_circ_001254	Bra036326	A09	+	559688	566795	7108	antisense
novel_circ_001255	Bra036307	A09	-	693385	699312	5928	antisense
novel_circ_001256	Bra036257	A09	-	1012700	1013102	403	antisense
novel_circ_001257	Bra036248	A09	-	1049569	1049770	202	one_exon
novel_circ_001258	Bra034241	A09	-	1428015	1434397	6383	exon_intron
novel_circ_001259	Bra034240	A09	+	1428015	1434397	5680	exon_intron
novel_circ_001260	Bra039091	A09	+	1542332	1542455	124	one_exon
novel_circ_001261	Bra036204	A09	-	1939532	1943362	3269	exon_intron
novel_circ_001262	Bra036172	A09	+	2103741	2104013	273	antisense
novel_circ_001263	Bra036172	A09	-	2103741	2104013	273	one_exon
novel_circ_001264	Bra036111	A09	-	2420696	2420941	246	antisense
novel_circ_001265	Bra036620	A09	+	2538553	2538774	222	one_exon
novel_circ_001266	NA	A09	-	2988917	2989437	521	intergenic
novel_circ_001267	Bra035938	A09	+	3433704	3434004	221	annot_exons
novel_circ_001268	Bra035903	A09	-	3599839	3600009	171	one_exon
novel_circ_001269	Bra035886	A09	+	3702836	3715009	12174	antisense
novel_circ_001270	Bra037787	A09	-	4176422	4176600	179	exon_intron
novel_circ_001271	Bra037827	A09	+	4408309	4408613	305	one_exon
novel_circ_001272	Bra037833	A09	+	4439700	4440443	744	antisense
novel_circ_001273	Bra037150	A09	-	4675355	4675544	190	one_exon
novel_circ_001274	Bra037185	A09	+	4817189	4817678	414	exon_intron
novel_circ_001275	Bra037197	A09	+	4915301	4915599	299	one_exon
novel_circ_001276	Bra037296	A09	-	5092135	5092278	144	antisense
novel_circ_001277	Bra037264	A09	+	5283077	5283276	200	exon_intron
novel_circ_001278	Bra037217	A09	+	5584992	5585177	186	antisense
novel_circ_001279	Bra038567	A09	-	5788610	5789678	1069	antisense
novel_circ_001280	Bra036714	A09	+	5898179	5898380	202	one_exon
novel_circ_001281	Bra036642	A09	+	6325600	6325734	135	antisense
novel_circ_001282	Bra027772	A09	-	6716433	6729306	7430	exon_intron
novel_circ_001283	Bra027772	A09	-	6716926	6721276	4351	intronic
novel_circ_001284	Bra027685	A09	-	7369782	7369958	177	antisense
novel_circ_001285	Bra027640	A09	-	7622534	7622877	344	exon_intron
novel_circ_001286	Bra027006	A09	-	7937665	7938112	332	annot_exons
novel_circ_001287	Bra027042	A09	+	8274512	8274772	261	antisense
novel_circ_001288	Bra027042	A09	-	8274545	8274658	114	one_exon
novel_circ_001289	Bra027053	A09	+	8435384	8463931	27735	exon_intron
novel_circ_001290	Bra027073	A09	-	8642232	8642998	767	antisense
novel_circ_001291	Bra027078	A09	-	8683995	8684174	180	antisense
novel_circ_001292	Bra027078	A09	-	8683995	8684177	183	antisense
novel_circ_001293	Bra027104	A09	-	8945174	8945347	174	antisense
novel_circ_001294	Bra027140	A09	-	9179274	9179632	359	antisense
novel_circ_001295	Bra027850	A09	-	9687294	9687557	264	antisense
novel_circ_001296	NA	A09	-	10204421	10205600	1180	intergenic
novel_circ_001297	Bra027964	A09	+	10604491	10604780	290	antisense
novel_circ_001298	NA	A09	-	10666344	10666496	153	intergenic
novel_circ_001299	Bra027442	A09	+	10833254	10833923	526	exon_intron
novel_circ_001300	Bra027465	A09	-	10989943	10990467	339	exon_intron
novel_circ_001301	Bra027468	A09	-	11009283	11009513	231	antisense
novel_circ_001302	Bra027468	A09	-	11010449	11010821	373	antisense
novel_circ_001303	Bra027501	A09	+	11313391	11316628	3238	antisense
novel_circ_001304	Bra027501	A09	+	11313393	11313531	139	antisense
novel_circ_001305	Bra027543	A09	-	11659916	11660209	294	one_exon
novel_circ_001306	Bra027553	A09	-	11731010	11747949	16763	exon_intron
novel_circ_001307	Bra027574	A09	+	11856794	11857110	317	antisense
novel_circ_001308	Bra027582	A09	-	11948121	11948549	429	exon_intron
novel_circ_001309	Bra027594	A09	+	12072615	12072782	168	antisense
novel_circ_001310	NA	A09	-	12178966	12179753	788	intergenic
novel_circ_001311	Bra017486	A09	-	13407461	13407845	295	annot_exons
novel_circ_001312	Bra017483	A09	+	13417193	13429354	10850	exon_intron
novel_circ_001313	Bra017454	A09	-	13607076	13607278	203	one_exon
novel_circ_001314	Bra017454	A09	+	13607308	13607469	162	antisense
novel_circ_001315	Bra017415	A09	+	14030172	14030454	283	exon_intron
novel_circ_001316	Bra017415	A09	+	14030177	14030403	227	exon_intron
novel_circ_001317	Bra017400	A09	-	14130445	14130673	229	antisense
novel_circ_001318	Bra017400	A09	-	14130450	14130645	196	antisense
novel_circ_001319	Bra017389	A09	-	14266767	14266924	158	antisense
novel_circ_001320	Bra017350	A09	-	14657552	14657765	214	antisense
novel_circ_001321	Bra037896	A09	-	15877862	15878413	552	one_exon
novel_circ_001322	Bra029464	A09	+	17513043	17517010	3903	exon_intron
novel_circ_001323	Bra029545	A09	-	18170173	18170570	398	antisense
novel_circ_001324	Bra029545	A09	-	18170399	18170583	185	antisense
novel_circ_001325	Bra029545	A09	+	18170399	18170583	185	one_exon
novel_circ_001326	Bra029545	A09	+	18170863	18171071	209	one_exon
novel_circ_001327	NA	A09	+	18254356	18254781	426	intergenic
novel_circ_001328	Bra029555	A09	-	18257541	18277340	14756	exon_intron
novel_circ_001329	Bra029555	A09	-	18257541	18282288	19589	exon_intron
novel_circ_001330	NA	A09	+	18371189	18371416	228	intergenic
novel_circ_001331	Bra029570	A09	+	18371239	18371466	228	exon_intron
novel_circ_001332	NA	A09	-	18503854	18504126	273	intergenic
novel_circ_001333	Bra028058	A09	+	18962111	18962683	573	one_exon
novel_circ_001334	Bra028047	A09	+	19091960	19092247	288	one_exon
novel_circ_001335	Bra023284	A09	-	20001788	20002041	254	one_exon
novel_circ_001336	Bra023215	A09	-	20668621	20693321	23637	exon_intron
novel_circ_001337	Bra023215	A09	-	20668621	20697180	27496	exon_intron
novel_circ_001338	NA	A09	-	20729500	20741521	12022	intergenic
novel_circ_001339	NA	A09	+	22547599	22548433	835	intergenic
novel_circ_001340	Bra032906	A09	+	23087723	23088058	336	one_exon
novel_circ_001341	Bra032906	A09	-	23087841	23088169	329	antisense
novel_circ_001342	Bra032906	A09	-	23087905	23088513	609	antisense
novel_circ_001343	Bra032906	A09	-	23087914	23088162	249	antisense
novel_circ_001344	Bra032906	A09	+	23087918	23088226	309	one_exon
novel_circ_001345	Bra032906	A09	+	23087920	23088228	309	one_exon
novel_circ_001346	Bra032906	A09	-	23087920	23088228	309	antisense
novel_circ_001347	Bra032906	A09	+	23087923	23088114	192	one_exon
novel_circ_001348	Bra032906	A09	+	23087923	23088153	231	one_exon
novel_circ_001349	Bra032906	A09	+	23087923	23088192	270	one_exon
novel_circ_001350	Bra032906	A09	+	23087923	23088210	288	one_exon
novel_circ_001351	Bra032906	A09	+	23087934	23088239	306	one_exon
novel_circ_001352	Bra032906	A09	+	23087937	23088161	225	one_exon
novel_circ_001353	Bra032906	A09	+	23087937	23088200	264	one_exon
novel_circ_001354	Bra032906	A09	+	23087937	23088239	303	one_exon
novel_circ_001355	Bra032906	A09	-	23088005	23088232	228	antisense
novel_circ_001356	Bra032906	A09	+	23088012	23088200	189	one_exon
novel_circ_001357	Bra032906	A09	-	23088076	23088228	153	antisense
novel_circ_001358	Bra032893	A09	+	23186189	23186642	277	exon_intron
novel_circ_001359	Bra032889	A09	-	23260143	23260298	156	antisense
novel_circ_001360	Bra032889	A09	-	23260143	23260334	192	antisense
novel_circ_001361	NA	A09	-	23429618	23429832	215	intergenic
novel_circ_001362	Bra032847	A09	+	23600624	23601851	1228	antisense
novel_circ_001363	Bra032810	A09	+	23811729	23812019	291	antisense
novel_circ_001364	Bra032810	A09	-	23811814	23812149	336	one_exon
novel_circ_001365	Bra032800	A09	-	23872521	23875440	810	exon_intron
novel_circ_001366	Bra024759	A09	-	24189566	24189922	196	annot_exons
novel_circ_001367	Bra024640	A09	+	25091822	25092056	235	antisense
novel_circ_001368	Bra024634	A09	+	25124905	25125076	172	one_exon
novel_circ_001369	Bra024613	A09	+	25246118	25261435	15318	antisense
novel_circ_001370	Bra024611	A09	+	25295024	25295239	216	antisense
novel_circ_001371	NA	A09	-	25716242	25716514	273	intergenic
novel_circ_001372	NA	A09	-	25716255	25716541	287	intergenic
novel_circ_001373	Bra031382	A09	-	25992191	25992519	329	exon_intron
novel_circ_001374	Bra031374	A09	-	26037985	26038252	268	one_exon
novel_circ_001375	Bra036100	A09	-	26828696	26833687	4992	exon_intron
novel_circ_001376	Bra036100	A09	+	26828696	26833687	4992	antisense
novel_circ_001377	Bra036846	A09	+	26964895	26965074	180	one_exon
novel_circ_001378	Bra036846	A09	+	26964944	26965123	180	one_exon
novel_circ_001379	Bra036831	A09	-	27082171	27082761	525	exon_intron
novel_circ_001380	NA	A09	+	27164906	27165101	196	intergenic
novel_circ_001381	NA	A09	-	27241656	27244125	2470	intergenic
novel_circ_001382	Bra036795	A09	+	27290008	27290303	296	exon_intron
novel_circ_001383	Bra036791	A09	+	27305367	27306530	1164	antisense
novel_circ_001384	Bra006877	A09	-	27448432	27449023	592	one_exon
novel_circ_001385	Bra006907	A09	+	27592571	27612592	19877	exon_intron
novel_circ_001386	Bra006937	A09	+	27847051	27847270	220	one_exon
novel_circ_001387	Bra006998	A09	+	28258255	28258459	205	antisense
novel_circ_001388	Bra007007	A09	+	28290051	28302258	11430	exon_intron
novel_circ_001389	Bra007042	A09	+	28521908	28526621	4714	antisense
novel_circ_001390	Bra007077	A09	-	28690098	28694439	4342	intronic
novel_circ_001391	NA	A09	+	28713271	28713629	359	intergenic
novel_circ_001392	Bra007083	A09	+	28726787	28727033	247	antisense
novel_circ_001393	Bra007120	A09	-	28946386	28946730	153	annot_exons
novel_circ_001394	Bra007200	A09	-	29445904	29446086	183	one_exon
novel_circ_001395	Bra007205	A09	+	29496397	29496582	186	one_exon
novel_circ_001396	Bra007205	A09	-	29496397	29496582	186	antisense
novel_circ_001397	Bra007339	A09	-	30206067	30206259	193	one_exon
novel_circ_001398	Bra007389	A09	-	30479746	30488477	8390	exon_intron
novel_circ_001399	Bra007434	A09	-	30701785	30703164	1155	annot_exons
novel_circ_001400	Bra007440	A09	-	30739775	30741011	1237	antisense
novel_circ_001401	Bra007444	A09	+	30757046	30757470	425	exon_intron
novel_circ_001402	Bra007505	A09	+	31047670	31047882	213	exon_intron
novel_circ_001403	Bra007592	A09	+	31444717	31449001	3896	exon_intron
novel_circ_001404	Bra007608	A09	+	31518332	31518654	224	annot_exons
novel_circ_001405	Bra007656	A09	+	31807439	31807839	401	antisense
novel_circ_001406	Bra007699	A09	+	31970448	31974122	2604	exon_intron
novel_circ_001407	Bra007709	A09	-	32011813	32012028	216	exon_intron
novel_circ_001408	Bra007715	A09	+	32023959	32025829	1603	exon_intron
novel_circ_001409	Bra007715	A09	-	32023962	32025832	1871	antisense
novel_circ_001410	Bra007856	A09	-	32778668	32779141	314	exon_intron
novel_circ_001411	Bra039237	A09	+	32855594	32856067	347	exon_intron
novel_circ_001412	Bra039230	A09	+	32885887	32886109	223	one_exon
novel_circ_001413	Bra039939	A09	-	33220124	33220483	360	antisense
novel_circ_001414	Bra039923	A09	-	33377865	33378085	221	one_exon
novel_circ_001415	Bra038516	A09	-	33464878	33464987	110	antisense
novel_circ_001416	Bra038516	A09	+	33464878	33464987	110	one_exon
novel_circ_001417	Bra038516	A09	-	33464965	33465183	219	antisense
novel_circ_001418	Bra038518	A09	-	33477320	33477656	337	antisense
novel_circ_001419	Bra038521	A09	-	33490717	33490973	257	antisense
novel_circ_001420	Bra038538	A09	-	33605419	33605845	427	antisense
novel_circ_001421	NA	A09	-	33644366	33644583	218	intergenic
novel_circ_001422	Bra031225	A09	+	33666441	33666781	341	one_exon
novel_circ_001423	Bra031157	A09	+	34011378	34011673	296	antisense
novel_circ_001424	NA	A09	+	34073942	34074091	150	intergenic
novel_circ_001425	NA	A09	+	34155463	34155680	218	intergenic
novel_circ_001426	Bra031048	A09	-	34499660	34500154	495	one_exon
novel_circ_001427	Bra030992	A09	-	34807403	34807610	208	antisense
novel_circ_001428	NA	A09	+	35000146	35000686	541	intergenic
novel_circ_001429	NA	A09	-	35000149	35000689	541	intergenic
novel_circ_001430	Bra026811	A09	+	35574978	35575355	378	exon_intron
novel_circ_001431	Bra026813	A09	+	35579422	35579574	153	antisense
novel_circ_001432	Bra026860	A09	-	35757810	35758030	221	one_exon
novel_circ_001433	Bra026882	A09	+	35844414	35861876	17363	exon_intron
novel_circ_001434	Bra026992	A09	+	36420179	36420361	183	antisense
novel_circ_001435	Bra031771	A09	-	36565891	36566156	266	exon_intron
novel_circ_001436	Bra031756	A09	+	36650162	36653578	3417	antisense
novel_circ_001437	Bra031693	A09	-	36970900	36971113	214	one_exon
novel_circ_001438	Bra031693	A09	+	36972672	36973430	759	antisense
novel_circ_001439	Bra031621	A09	+	37301662	37301941	280	one_exon
novel_circ_001440	Bra031605	A09	-	37383695	37386986	3128	exon_intron
novel_circ_001441	Bra031605	A09	+	37383695	37386986	3292	antisense
novel_circ_001442	Bra031605	A09	+	37383915	37384091	177	antisense
novel_circ_001443	Bra031605	A09	-	37383915	37384091	177	one_exon
novel_circ_001444	Bra031596	A09	+	37417693	37417931	239	one_exon
novel_circ_001445	Bra031584	A09	-	37422293	37468429	44862	exon_intron
novel_circ_001446	Bra031559	A09	+	37590873	37591076	204	antisense
novel_circ_001447	Bra032450	A09	+	37898993	37899217	225	antisense
novel_circ_001448	Bra032556	A09	+	38348564	38348860	297	one_exon
novel_circ_001449	Bra015607	A10	+	198076	198786	497	annot_exons
novel_circ_001450	Bra015538	A10	-	702400	702624	225	antisense
novel_circ_001451	Bra015508	A10	-	854675	854872	198	one_exon
novel_circ_001452	Bra015417	A10	-	1423423	1423742	320	one_exon
novel_circ_001453	Bra015348	A10	-	1869720	1870349	630	antisense
novel_circ_001454	Bra015302	A10	-	2106102	2106780	679	antisense
novel_circ_001455	Bra015302	A10	-	2110833	2111089	257	antisense
novel_circ_001456	Bra015257	A10	+	2362023	2377544	15522	antisense
novel_circ_001457	NA	A10	+	2793957	2794239	283	intergenic
novel_circ_001458	Bra033335	A10	+	2824681	2825041	192	annot_exons
novel_circ_001459	Bra033331	A10	-	2855437	2855736	300	one_exon
novel_circ_001460	Bra033294	A10	-	3083360	3084628	1269	exon_intron
novel_circ_001461	NA	A10	+	3307328	3307768	441	intergenic
novel_circ_001462	Bra033225	A10	-	3438047	3438223	177	antisense
novel_circ_001463	Bra033225	A10	-	3438047	3438259	213	antisense
novel_circ_001464	Bra033225	A10	-	3438047	3438265	219	antisense
novel_circ_001465	NA	A10	+	3486235	3486632	398	intergenic
novel_circ_001466	NA	A10	+	3486238	3486635	398	intergenic
novel_circ_001467	NA	A10	+	3536878	3537053	176	intergenic
novel_circ_001468	NA	A10	-	3545188	3548683	3496	intergenic
novel_circ_001469	NA	A10	+	3545188	3548683	3496	intergenic
novel_circ_001470	Bra037935	A10	-	3857070	3857393	222	annot_exons
novel_circ_001471	Bra037933	A10	-	3873570	3873752	183	antisense
novel_circ_001472	Bra003102	A10	+	5224768	5225055	288	antisense
novel_circ_001473	Bra003091	A10	+	5329720	5330121	402	antisense
novel_circ_001474	Bra003044	A10	+	5842332	5842562	231	exon_intron
novel_circ_001475	Bra003044	A10	+	5842336	5842566	231	exon_intron
novel_circ_001476	Bra003044	A10	-	5842340	5842564	225	antisense
novel_circ_001477	Bra003044	A10	-	5842369	5843008	640	antisense
novel_circ_001478	Bra002914	A10	-	6842756	6842970	215	one_exon
novel_circ_001479	Bra002861	A10	+	7140863	7141738	876	one_exon
novel_circ_001480	Bra002821	A10	-	7420871	7421548	399	annot_exons
novel_circ_001481	NA	A10	-	7593729	7593958	230	intergenic
novel_circ_001482	Bra002778	A10	+	7701592	7702163	351	exon_intron
novel_circ_001483	Bra002764	A10	-	7806909	7807151	243	antisense
novel_circ_001484	Bra002764	A10	-	7806909	7807154	246	antisense
novel_circ_001485	Bra002764	A10	-	7806909	7807157	249	antisense
novel_circ_001486	Bra002764	A10	-	7807242	7807563	322	antisense
novel_circ_001487	Bra002764	A10	-	7807245	7807563	319	antisense
novel_circ_001488	Bra002764	A10	+	7807249	7807567	319	one_exon
novel_circ_001489	Bra002755	A10	-	7907720	7909619	972	annot_exons
novel_circ_001490	Bra002710	A10	+	8134050	8134405	250	annot_exons
novel_circ_001491	Bra002677	A10	+	8354490	8354641	152	one_exon
novel_circ_001492	Bra002677	A10	+	8357383	8357737	355	one_exon
novel_circ_001493	Bra002677	A10	-	8358203	8358602	400	antisense
novel_circ_001494	Bra002668	A10	-	8392339	8392887	549	antisense
novel_circ_001495	Bra002668	A10	-	8392726	8392995	270	antisense
novel_circ_001496	Bra002668	A10	-	8392960	8393142	183	antisense
novel_circ_001497	Bra002668	A10	-	8392966	8393190	225	antisense
novel_circ_001498	Bra002608	A10	-	8642231	8642860	630	one_exon
novel_circ_001499	Bra002567	A10	-	8899378	8903273	3896	antisense
novel_circ_001500	Bra002566	A10	-	8913350	8913546	197	antisense
novel_circ_001501	Bra002497	A10	+	9282643	9282874	232	one_exon
novel_circ_001502	Bra002497	A10	-	9282644	9282868	225	antisense
novel_circ_001503	Bra002497	A10	-	9282684	9282968	285	antisense
novel_circ_001504	Bra002497	A10	+	9282690	9282974	285	one_exon
novel_circ_001505	Bra002495	A10	-	9283248	9318961	35714	antisense
novel_circ_001506	Bra002437	A10	-	9656442	9662891	6450	antisense
novel_circ_001507	Bra002437	A10	+	9656442	9662891	6450	exon_intron
novel_circ_001508	Bra002400	A10	-	9900401	9900706	306	antisense
novel_circ_001509	Bra002388	A10	-	9956279	9956600	322	antisense
novel_circ_001510	Bra002362	A10	+	10123996	10124172	177	one_exon
novel_circ_001511	Bra002354	A10	+	10192523	10192732	210	antisense
novel_circ_001512	Bra002286	A10	-	10555100	10555551	452	one_exon
novel_circ_001513	NA	A10	+	10692551	10693119	569	intergenic
novel_circ_001514	NA	A10	-	10692582	10692824	243	intergenic
novel_circ_001515	Bra002253	A10	+	10714990	10715200	211	antisense
novel_circ_001516	Bra002248	A10	+	10743700	10744101	402	exon_intron
novel_circ_001517	Bra002211	A10	-	10929733	10930485	753	antisense
novel_circ_001518	Bra002115	A10	-	11436552	11436894	343	one_exon
novel_circ_001519	Bra008583	A10	+	11723647	11723815	169	antisense
novel_circ_001520	Bra008583	A10	+	11723657	11723921	265	antisense
novel_circ_001521	Bra008583	A10	+	11723962	11724507	546	antisense
novel_circ_001522	Bra008583	A10	-	11727051	11727547	497	one_exon
novel_circ_001523	Bra008595	A10	+	11772583	11773853	939	annot_exons
novel_circ_001524	NA	A10	+	11779490	11785752	6263	intergenic
novel_circ_001525	Bra008600	A10	-	11804949	11805129	181	one_exon
novel_circ_001526	Bra008633	A10	-	11979308	11979529	222	antisense
novel_circ_001527	Bra008667	A10	-	12108585	12109053	469	antisense
novel_circ_001528	Bra008667	A10	+	12108630	12109020	391	exon_intron
novel_circ_001529	Bra008695	A10	-	12236688	12237258	571	antisense
novel_circ_001530	NA	A10	+	12508113	12508575	463	intergenic
novel_circ_001531	NA	A10	+	12819282	12819571	290	intergenic
novel_circ_001532	Bra008831	A10	+	12830597	12830934	250	annot_exons
novel_circ_001533	Bra008831	A10	+	12830775	12831128	354	exon_intron
novel_circ_001534	Bra008834	A10	+	12840653	12841010	249	annot_exons
novel_circ_001535	Bra008911	A10	-	13184820	13186123	1304	antisense
novel_circ_001536	Bra008953	A10	+	13384614	13384996	309	annot_exons
novel_circ_001537	Bra008998	A10	+	13586539	13586955	417	one_exon
novel_circ_001538	Bra009023	A10	+	13698775	13706220	6769	exon_intron
novel_circ_001539	Bra009025	A10	+	13716136	13716393	258	one_exon
novel_circ_001540	Bra009034	A10	+	13769712	13773063	2507	exon_intron
novel_circ_001541	Bra009078	A10	+	13960177	13960458	200	exon_intron
novel_circ_001542	Bra009388	A10	+	14040907	14041233	327	one_exon
novel_circ_001543	Bra009388	A10	+	14040907	14041365	393	annot_exons
novel_circ_001544	Bra009388	A10	+	14040907	14041497	525	annot_exons
novel_circ_001545	Bra009388	A10	-	14041025	14041534	510	antisense
novel_circ_001546	Bra009388	A10	+	14041111	14041473	297	annot_exons
novel_circ_001547	Bra009330	A10	-	14274487	14274895	409	antisense
novel_circ_001548	Bra009329	A10	+	14278325	14278436	112	antisense
novel_circ_001549	Bra009306	A10	-	14404423	14404647	225	antisense
novel_circ_001550	Bra009306	A10	-	14404549	14404749	201	antisense
novel_circ_001551	Bra009306	A10	-	14404687	14404908	222	antisense
novel_circ_001552	Bra009298	A10	-	14441138	14441459	322	one_exon
novel_circ_001553	Bra009294	A10	-	14451140	14451631	492	exon_intron
novel_circ_001554	Bra009294	A10	-	14451449	14451640	192	one_exon
novel_circ_001555	Bra009237	A10	+	14709109	14711540	2432	antisense
novel_circ_001556	Bra009221	A10	-	14770810	14771282	473	antisense
novel_circ_001557	Bra009215	A10	-	14795573	14795734	162	one_exon
novel_circ_001558	Bra009184	A10	-	14912055	14912271	217	antisense
novel_circ_001559	Bra009184	A10	+	14912055	14912271	217	exon_intron
novel_circ_001560	Bra009184	A10	-	14912065	14912333	269	antisense
novel_circ_001561	Bra009149	A10	-	15050081	15050294	214	one_exon
novel_circ_001562	Bra009149	A10	-	15050105	15050512	408	one_exon
novel_circ_001563	Bra009130	A10	+	15125241	15125916	605	annot_exons
novel_circ_001564	NA	A10	+	15254393	15254625	233	intergenic
novel_circ_001565	Bra009090	A10	-	15265719	15265984	266	one_exon
novel_circ_001566	Bra009416	A10	-	15349799	15353469	3596	exon_intron
novel_circ_001567	Bra009416	A10	-	15349799	15354108	4163	exon_intron
novel_circ_001568	Bra009416	A10	-	15353196	15353834	567	annot_exons
novel_circ_001569	Bra009434	A10	+	15437234	15437684	451	antisense
novel_circ_001570	Bra009434	A10	-	15437333	15437701	369	one_exon
novel_circ_001571	Bra009460	A10	-	15549110	15553699	4310	exon_intron
novel_circ_001572	Bra009480	A10	+	15671661	15671834	174	antisense
novel_circ_001573	Bra009561	A10	+	16039749	16039938	190	antisense
novel_circ_001574	NA	pseudoChr	-	100778	101792	1015	intergenic
novel_circ_001575	NA	pseudoChr	-	707832	715645	7814	intergenic
novel_circ_001576	NA	pseudoChr	+	708679	716112	7434	intergenic
novel_circ_001577	NA	pseudoChr	-	708679	716112	7434	intergenic
novel_circ_001578	NA	pseudoChr	+	797865	798613	749	intergenic
novel_circ_001579	Bra034972	pseudoChr	+	1383761	1384251	401	exon_intron
novel_circ_001580	Bra034989	pseudoChr	+	1622257	1622482	226	antisense
novel_circ_001581	Bra035007	pseudoChr	+	1782133	1782583	359	exon_intron
novel_circ_001582	Bra035007	pseudoChr	-	1782993	1783314	322	antisense
novel_circ_001583	Bra035388	pseudoChr	+	3166689	3166927	239	one_exon
novel_circ_001584	NA	pseudoChr	+	3171344	3171639	296	intergenic
novel_circ_001585	NA	pseudoChr	-	3171344	3171639	296	intergenic
novel_circ_001586	NA	pseudoChr	+	3445431	3449499	4069	intergenic
novel_circ_001587	Bra035985	pseudoChr	-	3697655	3698194	373	annot_exons
novel_circ_001588	NA	pseudoChr	+	4372626	4376331	3706	intergenic
novel_circ_001589	NA	pseudoChr	-	4372626	4376331	3706	intergenic
novel_circ_001590	Bra038174	pseudoChr	+	5028316	5028536	221	exon_intron
novel_circ_001591	Bra039385	pseudoChr	+	7207719	7207967	249	one_exon
novel_circ_001592	Bra039529	pseudoChr	+	7550607	7551089	392	exon_intron
novel_circ_001593	Bra039579	pseudoChr	-	7786552	7786760	209	one_exon
novel_circ_001594	NA	pseudoChr	+	7954281	7957272	2992	intergenic
novel_circ_001595	NA	pseudoChr	+	7954281	7958512	4232	intergenic
novel_circ_001596	NA	pseudoChr	-	7957076	7958315	1240	intergenic
novel_circ_001597	NA	pseudoChr	+	7958202	7958553	352	intergenic
novel_circ_001598	NA	pseudoChr	+	7958279	7958630	352	intergenic
novel_circ_001599	NA	pseudoChr	-	8400328	8401744	1417	intergenic
novel_circ_001600	NA	pseudoChr	+	8400363	8401779	1417	intergenic
novel_circ_001601	NA	pseudoChr	+	8870514	8872282	1769	intergenic
novel_circ_001602	Bra040003	pseudoChr	-	9001441	9001982	542	one_exon
novel_circ_001603	Bra040186	pseudoChr	+	9145091	9145503	413	antisense
novel_circ_001604	Bra040201	pseudoChr	+	9216051	9216207	157	one_exon
novel_circ_001605	Bra040261	pseudoChr	-	9398855	9399145	291	one_exon
novel_circ_001606	Bra040262	pseudoChr	+	9405097	9405555	381	annot_exons
novel_circ_001607	NA	pseudoChr	-	9655701	9658310	2610	intergenic
novel_circ_001608	NA	pseudoChr	+	10237801	10239703	1903	intergenic
novel_circ_001609	NA	pseudoChr	+	10628773	10629421	649	intergenic
novel_circ_001610	Bra040643	pseudoChr	+	11638672	11638857	186	one_exon
novel_circ_001611	NA	pseudoChr	+	11767420	11767748	329	intergenic
novel_circ_001612	Bra040683	pseudoChr	+	11807312	11811940	3363	exon_intron
novel_circ_001613	Bra040730	pseudoChr	-	12237985	12241623	3639	exon_intron
novel_circ_001614	Bra040759	pseudoChr	+	12733761	12752778	13525	exon_intron
novel_circ_001615	Bra040759	pseudoChr	+	12733761	12759710	20457	exon_intron
novel_circ_001616	Bra040763	pseudoChr	+	12775350	12778575	3158	exon_intron
novel_circ_001617	Bra040763	pseudoChr	-	12775350	12778575	3226	antisense
novel_circ_001618	NA	pseudoChr	-	12777961	12798391	20431	intergenic
novel_circ_001619	Bra040782	pseudoChr	-	13044548	13044881	334	exon_intron
novel_circ_001620	NA	pseudoChr	+	13067262	13067472	211	intergenic
novel_circ_001621	NA	pseudoChr	+	13273542	13273761	220	intergenic
novel_circ_001622	NA	pseudoChr	+	14110564	14110791	228	intergenic
novel_circ_001623	Bra040870	pseudoChr	-	14239673	14239938	266	one_exon
novel_circ_001624	NA	pseudoChr	+	14452110	14452571	462	intergenic
novel_circ_001625	Bra040906	pseudoChr	-	14690940	14691126	187	exon_intron
novel_circ_001626	NA	pseudoChr	-	15124514	15126279	1766	intergenic
novel_circ_001627	NA	pseudoChr	+	15124514	15126279	1766	intergenic
novel_circ_001628	NA	pseudoChr	+	16693192	16700694	7503	intergenic
novel_circ_001629	NA	pseudoChr	-	17365445	17371718	6274	intergenic
novel_circ_001630	NA	pseudoChr	+	18023931	18024106	176	intergenic
novel_circ_001631	NA	pseudoChr	-	18180423	18180795	373	intergenic
novel_circ_001632	Bra041104	pseudoChr	-	18374952	18378019	3068	antisense
novel_circ_001633	NA	pseudoChr	-	18453155	18454994	1840	intergenic
novel_circ_001634	NA	pseudoChr	-	18637241	18640403	3163	intergenic
novel_circ_001635	NA	pseudoChr	+	19635377	19721333	85957	intergenic
novel_circ_001636	NA	pseudoChr	-	20328086	20384602	56517	intergenic
