# Supplementary material for: Identification and Characterization of Circular RNAs in Brassica rapa in Response to Plasmodiophora brassicae
Source: Research Square preprint supplement (doi:10.21203/rs.3.rs-666198/v1), 2021-08-20
Supplement: Supplementary file 8 [file 6bae170052f1259bc707a67c.xlsx]

## Sheet: Sheet1
The putative miRNA-binding sites of circRNAs
miRNA	target	target_start	target_end	energy(kcal/mol)	MFE ratio	target_region(3'->5')	mirna-target_pairing(5'->3')	miRNA_sequence(5'->3')	source_gene	chr	strand	genomic_start	genomic_end	spliced_length	annot_type
miR5021-x	novel_circ_000002	285	302	-20.3	0.6591	AUCUGCUGCUUCUUCUGC	x|||x|||||||||||xx	GAGAAGACGAAGAAGAAC	Bra011828	A01	-	346055	346493	439	antisense
miR2275-x	novel_circ_000027	6490	6507	-22.5	0.8007	ACGUCUCCUUUUCUUUGU	xx|o|||||||||||||x	AUCGGAGGAAAAGAAACU	Bra011217	A01	-	3259061	3301106	41491	exon_intron
miR2275-x	novel_circ_000027	38652	38669	-22.5	0.8065	CGGCCUCCUUUUCUUUAU	xo||||||||||||||xx	AUCGGAGGAAAAGAAACU	Bra011217	A01	-	3259061	3301106	41491	exon_intron
miR479-y	novel_circ_000027	15893	15912	-24.9	0.6975	UUUCGGCUUGGUUAUUUUGA	xo|||||||||||||xx|||	UGAGCCGAACCAAUAUCACU	Bra011217	A01	-	3259061	3301106	41491	exon_intron
miR5021-x	novel_circ_000027	23950	23967	-21.4	0.6948	CUCUUCUGUUUCUUAUUU	||||||||o|||||x||x	GAGAAGACGAAGAAGAAC	Bra011217	A01	-	3259061	3301106	41491	exon_intron
miR5149-y	novel_circ_000027	26339	26356	-20.3	0.6591	CUCGCCGCUUCUAUAUCU	||||x|o||||||x|||o	GAGCUGUGAAGAUUUAGG	Bra011217	A01	-	3259061	3301106	41491	exon_intron
miR845-x	novel_circ_000027	9742	9763	-29.6	0.7494	UCGAGACUAUGGUCAACAAUCC	x||||||||||||x|||||o|x	UGCUCUGAUACCAAUUGUUGGC	Bra011217	A01	-	3259061	3301106	41491	exon_intron
miR8594-x	novel_circ_000027	29890	29907	-16.9	0.6145	UACCAAUACUCUUCAAAU	||||x|||||||||xxx|	AUGGAUAUGAGAAGCAAA	Bra011217	A01	-	3259061	3301106	41491	exon_intron
novel-m0727-5p	novel_circ_000027	31629	31649	-21.1	0.6081	AAAUGUCUCAGUUCAACUCAA	|||||||||||x|xx|||||x	UUUACAGAGUCUACAUGAGUC	Bra011217	A01	-	3259061	3301106	41491	exon_intron
bra-miR156a-3p	novel_circ_000028	24594	24614	-28.5	0.6802	CGCAGGAGAGAGAGACGGUCG	||x|x|||||||||||o||x|	GCUUACUCUCUCUCUGUCACC	Bra011212	A01	+	3261519	3303955	42437	exon_intron
miR1134-y	novel_circ_000028	41808	41826	-20	0.6623	UUUGUGUUUUUUUUUUUCU	||o|||||o||o||o||||	AAGCACAAGAAGAAGAAGA	Bra011212	A01	+	3261519	3303955	42437	exon_intron
miR2275-x	novel_circ_000028	24150	24167	-22.2	0.7957	AAGUUUCCUUUUCUUUGC	x||oo||||||||||||x	AUCGGAGGAAAAGAAACU	Bra011212	A01	+	3261519	3303955	42437	exon_intron
miR2275-x	novel_circ_000028	33303	33320	-22.5	0.8007	ACGUCUCCUUUUCUUUGU	xx|o|||||||||||||x	AUCGGAGGAAAAGAAACU	Bra011212	A01	+	3261519	3303955	42437	exon_intron
novel-m0713-5p	novel_circ_000028	7344	7366	-39.8	0.995	UAGGUACACUUGCUGCUUUCUGC	||||||||||||||||||||||x	AUCCAUGUGAACGACGAAAGACA	Bra011212	A01	+	3261519	3303955	42437	exon_intron
bra-miR156a-3p	novel_circ_000029	23428	23448	-28.5	0.6802	CGCAGGAGAGAGAGACGGUCG	||x|x|||||||||||o||x|	GCUUACUCUCUCUCUGUCACC	Bra011212	A01	+	3262685	3305059	42375	exon_intron
miR1134-y	novel_circ_000029	40642	40660	-20	0.6623	UUUGUGUUUUUUUUUUUCU	||o|||||o||o||o||||	AAGCACAAGAAGAAGAAGA	Bra011212	A01	+	3262685	3305059	42375	exon_intron
miR2275-x	novel_circ_000029	22984	23001	-22.2	0.7957	AAGUUUCCUUUUCUUUGC	x||oo||||||||||||x	AUCGGAGGAAAAGAAACU	Bra011212	A01	+	3262685	3305059	42375	exon_intron
miR2275-x	novel_circ_000029	32137	32154	-22.5	0.8007	ACGUCUCCUUUUCUUUGU	xx|o|||||||||||||x	AUCGGAGGAAAAGAAACU	Bra011212	A01	+	3262685	3305059	42375	exon_intron
novel-m0713-5p	novel_circ_000029	6178	6200	-39.8	0.995	UAGGUACACUUGCUGCUUUCUGC	||||||||||||||||||||||x	AUCCAUGUGAACGACGAAAGACA	Bra011212	A01	+	3262685	3305059	42375	exon_intron
miR2275-x	novel_circ_000030	736	753	-22.5	0.8065	CGGCCUCCUUUUCUUUAU	xo||||||||||||||xx	AUCGGAGGAAAAGAAACU	Bra011217	A01	-	3262685	3305059	41820	exon_intron
miR2275-x	novel_circ_000030	10443	10460	-22.5	0.8007	ACGUCUCCUUUUCUUUGU	xx|o|||||||||||||x	AUCGGAGGAAAAGAAACU	Bra011217	A01	-	3262685	3305059	41820	exon_intron
miR479-y	novel_circ_000030	19846	19865	-24.9	0.6975	UUUCGGCUUGGUUAUUUUGA	xo|||||||||||||xx|||	UGAGCCGAACCAAUAUCACU	Bra011217	A01	-	3262685	3305059	41820	exon_intron
miR5021-x	novel_circ_000030	27903	27920	-21.4	0.6948	CUCUUCUGUUUCUUAUUU	||||||||o|||||x||x	GAGAAGACGAAGAAGAAC	Bra011217	A01	-	3262685	3305059	41820	exon_intron
miR5149-y	novel_circ_000030	30292	30309	-20.3	0.6591	CUCGCCGCUUCUAUAUCU	||||x|o||||||x|||o	GAGCUGUGAAGAUUUAGG	Bra011217	A01	-	3262685	3305059	41820	exon_intron
miR845-x	novel_circ_000030	13695	13716	-29.6	0.7494	UCGAGACUAUGGUCAACAAUCC	x||||||||||||x|||||o|x	UGCUCUGAUACCAAUUGUUGGC	Bra011217	A01	-	3262685	3305059	41820	exon_intron
miR8594-x	novel_circ_000030	33843	33860	-16.9	0.6145	UACCAAUACUCUUCAAAU	||||x|||||||||xxx|	AUGGAUAUGAGAAGCAAA	Bra011217	A01	-	3262685	3305059	41820	exon_intron
novel-m0727-5p	novel_circ_000030	35582	35602	-21.1	0.6081	AAAUGUCUCAGUUCAACUCAA	|||||||||||x|xx|||||x	UUUACAGAGUCUACAUGAGUC	Bra011217	A01	-	3262685	3305059	41820	exon_intron
miR824-x	novel_circ_000044	4256	4274	-18.1	0.6441	AACUAGUAAACACUCUUUU	|x||x||||||||||||xx	UAGACCAUUUGUGAGAAUU	Bra011062	A01	+	4143306	4161424	18119	antisense
novel-m0521-3p	novel_circ_000045	2773	2792	-40.2	0.841	GUCUCCUCCUCCCCUCACAC	||||||||||||||||x|xx	CAGAGGAGGAGGGGAGGGGA	Bra011039	A01	-	4287935	4292401	4467	exon_intron
miR2275-x	novel_circ_000126	3884	3901	-17.6	0.6308	UCCUCUCCUUUUCUAUGA	|xxo||||||||||x|||	AUCGGAGGAAAAGAAACU	Bra013681	A01	+	7094746	7111412	9491	exon_intron
miR2275-x	novel_circ_000127	3884	3901	-17.6	0.6308	UCCUCUCCUUUUCUAUGA	|xxo||||||||||x|||	AUCGGAGGAAAAGAAACU	Bra013681	A01	+	7094746	7128789	26868	exon_intron
novel-m0317-5p	novel_circ_000127	26567	26586	-18.4	0.6323	ACCGGUUGUUAUUUUAAAAU	|||||||oo||x||||||x|	UGGCCAAUGAUUAAAUUUGA	Bra013681	A01	+	7094746	7128789	26868	exon_intron
miR1134-y	novel_circ_000132	540	558	-22.6	0.7635	UUCUUCUUCUUCUGCUUCU	|||x|x|||||||x|||||	AAGCACAAGAAGAAGAAGA	Bra013717	A01	-	7372461	7373162	702	antisense
miR5021-x	novel_circ_000132	535	552	-23.4	0.7748	UUCUUCUGCUUCUUCGGC	o||||||||||||||xxx	GAGAAGACGAAGAAGAAC	Bra013717	A01	-	7372461	7373162	702	antisense
miR5021-x	novel_circ_000141	6794	6811	-21.1	0.7057	UUCUUCUGUUUCUUCAUG	o|||||||o||||||x||	GAGAAGACGAAGAAGAAC	Bra026257	A01	+	10135105	10144611	8858	exon_intron
miR5021-x	novel_circ_000141	8637	8654	-19.4	0.6488	UUCUUCUGCUUCUGACUG	o||||||||||||xxx||	GAGAAGACGAAGAAGAAC	Bra026257	A01	+	10135105	10144611	8858	exon_intron
miR845-x	novel_circ_000152	257	278	-29.8	0.7506	ACGAGACUAUGGUUAACACUUU	||||||||||||||||||xoox	UGCUCUGAUACCAAUUGUUGGC	Bra037608	A01	-	12650779	12655791	1353	exon_intron
novel-m0135-3p	novel_circ_000158	65	85	-19.5	0.6331	AUCCUAUAUCCCAAACCCAAA	||x|||x||||||||x||x||	UAUGAUUUAGGGUUUAGGAUU	NA	A01	+	13617774	13617976	203	intergenic
novel-m0161-3p	novel_circ_000158	71	91	-24.2	0.7446	GUCCAAAUCCUAUAUCCCAAA	xox|||||||||x||||||||	AGAGUUUAGGAUUUAGGGUUU	NA	A01	+	13617774	13617976	203	intergenic
novel-m0225-3p	novel_circ_000158	71	91	-24.2	0.7446	GUCCAAAUCCUAUAUCCCAAA	xox|||||||||x||||||||	AGAGUUUAGGAUUUAGGGUUU	NA	A01	+	13617774	13617976	203	intergenic
novel-m0392-3p	novel_circ_000158	71	91	-24.2	0.7446	GUCCAAAUCCUAUAUCCCAAA	xox|||||||||x||||||||	AGAGUUUAGGAUUUAGGGUUU	NA	A01	+	13617774	13617976	203	intergenic
novel-m0399-3p	novel_circ_000158	95	115	-22.9	0.696	CAAAACCCAAAUCCCGGAUCU	x|||x||||||||||xo||||	AUUUAGGGUUUAGGGAUUAGA	NA	A01	+	13617774	13617976	203	intergenic
novel-m0611-5p	novel_circ_000158	71	91	-24.2	0.7446	GUCCAAAUCCUAUAUCCCAAA	xox|||||||||x||||||||	AGAGUUUAGGAUUUAGGGUUU	NA	A01	+	13617774	13617976	203	intergenic
novel-m0812-3p	novel_circ_000158	95	115	-22.9	0.696	CAAAACCCAAAUCCCGGAUCU	x|||x||||||||||xo||||	AUUUAGGGUUUAGGGAUUAGA	NA	A01	+	13617774	13617976	203	intergenic
miR5021-x	novel_circ_000174	2201	2218	-22.2	0.7425	UUCUUCUGCUUCUUUUGU	o|||||||||||||o|xx	GAGAAGACGAAGAAGAAC	Bra023734	A01	-	18617217	18621946	4641	exon_intron
miR5293-x	novel_circ_000185	28229	28248	-23.3	0.6601	UUCUUCUCGUUCCUUAUUUU	||||||o||||||||x||o|	AAGAAGGGCAAGGAAGAAGA	Bra021321	A01	+	21393841	21426554	32629	exon_intron
novel-m0108-3p	novel_circ_000185	15537	15558	-25.9	0.6364	ACGUAAGCCUUCAUCUUCGUUA	||||x||x||||||||||||x|	UGCACUCAGAAGUAGAAGCACU	Bra021321	A01	+	21393841	21426554	32629	exon_intron
novel-m0510-3p	novel_circ_000185	17765	17786	-24.5	0.7585	UAUAUUAAUCUACCUGGUUGUA	|||||x||||||||||o|||x|	AUAUAUUUAGAUGGACUAACCU	Bra021321	A01	+	21393841	21426554	32629	exon_intron
miR5293-x	novel_circ_000186	18892	18911	-23.6	0.6686	UUCUUCUCGUUCCUUAUCCU	||||||o||||||||x|x||	AAGAAGGGCAAGGAAGAAGA	Bra021320	A01	-	21393841	21426554	28627	exon_intron
novel-m0108-3p	novel_circ_000186	16344	16365	-26.5	0.6527	AUGUGAGUCUUGACCUUCGCGA	|o|||||||||x|x|||||x||	UGCACUCAGAAGUAGAAGCACU	Bra021320	A01	-	21393841	21426554	28627	exon_intron
novel-m0580-5p	novel_circ_000197	417	437	-22.6	0.7314	UCUCUAGGAAUCGAUAUUGAA	|||||||||||||x|||xx|x	AGAGAUCCUUAGCAAUAUAUA	Bra021526	A01	-	23916055	23917007	615	annot_exons
miR5021-x	novel_circ_000206	1623	1640	-22.5	0.7426	CUCUUCUUCUUCUUCUUC	|||||||x|||||||||x	GAGAAGACGAAGAAGAAC	Bra040057	A01	+	25284156	25287213	2820	exon_intron
novel-m0732-3p	novel_circ_000206	240	260	-19.6	0.6068	AAACUAGAACACAAGAGAAGU	||||||||||||||x|xx|x|	UUUGAUCUUGUGUUGUGAUGA	Bra040057	A01	+	25284156	25287213	2820	exon_intron
novel-m0833-3p	novel_circ_000214	70	91	-25.7	0.6853	AUGGGAACCGGCAUAGGAACUA	||ox||||x||||||||||||x	UAUACUUGUCCGUAUCCUUGAC	Bra028836	A02	-	440834	441100	267	exon_intron
miR3699-y	novel_circ_000226	1992	2009	-16.6	0.6171	AAUCCUCUUCUUUCUCAC	||oxx||||||||||||x	UUGACAGAAGAAAGAGUU	Bra023397	A02	+	2165783	2172494	6712	antisense
novel-m0036-3p	novel_circ_000226	4244	4264	-24.6	0.6276	ACGCUAUAACUCAACCCAGAC	||x|||||x|||||||||ox|	UGAGAUAUGGAGUUGGGUUGG	Bra023397	A02	+	2165783	2172494	6712	antisense
miR5721-x	novel_circ_000242	3944	3964	-25.9	0.7115	CUUUUACUUCACCCUUUCUUU	|||||||o|||||||||xoo|	GAAAAUGGAGUGGGAAAUGGA	Bra020253	A02	-	4846204	4852977	6687	exon_intron
miR2275-x	novel_circ_000243	121	138	-19.8	0.6923	UAGUCUUCUUUUCUUUUU	|||o||o|||||||||xx	AUCGGAGGAAAAGAAACU	Bra020284	A02	+	4988001	4994368	6368	antisense
miR2936-x	novel_circ_000244	69761	69781	-26.6	0.665	UGCUUUCUCUCCUGUCUCUAC	x|||o||||||x|||||||x|	UCGAGAGAGAGAACAGAGACG	Bra020331	A02	+	5154654	5232063	76748	exon_intron
miR5185-y	novel_circ_000244	70125	70142	-25.8	0.7207	CCUCCAACCGACUCUCUC	|||||||||||x|||xox	GGAGGUUGGCUUAGAAGC	Bra020331	A02	+	5154654	5232063	76748	exon_intron
miR5293-x	novel_circ_000244	72675	72694	-25.4	0.7216	UUCUUGCCGUUUCUUCUUUC	|||||x|||||o||||||ox	AAGAAGGGCAAGGAAGAAGA	Bra020331	A02	+	5154654	5232063	76748	exon_intron
novel-m0036-3p	novel_circ_000244	24696	24716	-36.5	0.9432	AUUCUAUACCUCAACCCAACC	|o|||||||||||||||||||	UGAGAUAUGGAGUUGGGUUGG	Bra020331	A02	+	5154654	5232063	76748	exon_intron
novel-m0059-3p	novel_circ_000244	38458	38480	-24.2	0.6914	AUCUCUUGGACUUACUUUUACAU	|x|||||||||||||o|x||x||	UUGAGAACCUGAAUGGAUAUUUA	Bra020331	A02	+	5154654	5232063	76748	exon_intron
novel-m0182-5p	novel_circ_000244	34252	34272	-24.3	0.7105	AACCAACUAAACACCAAUCCA	||||||x|x||||||||||||	UUGGUUCAAUUGUGGUUAGGU	Bra020331	A02	+	5154654	5232063	76748	exon_intron
novel-m0854-3p	novel_circ_000244	60915	60935	-17.1	0.6241	CUUUUAUUUCUUGACUAUUUU	||||||o|o||||xx||||||	GAAAAUGAGGAACAAAUAAAA	Bra020331	A02	+	5154654	5232063	76748	exon_intron
novel-m0856-3p	novel_circ_000244	38458	38480	-24.2	0.6914	AUCUCUUGGACUUACUUUUACAU	|x|||||||||||||o|x||x||	UUGAGAACCUGAAUGGAUAUUUA	Bra020331	A02	+	5154654	5232063	76748	exon_intron
novel-m0912-3p	novel_circ_000244	38458	38480	-24.2	0.6914	AUCUCUUGGACUUACUUUUACAU	|x|||||||||||||o|x||x||	UUGAGAACCUGAAUGGAUAUUUA	Bra020331	A02	+	5154654	5232063	76748	exon_intron
novel-m0220-3p	novel_circ_000273	1971	1991	-24	0.6366	AGAAAGGUCGUGGAGAACUUG	|o|||||||||||x|xx||||	UUUUUCCAGCACCACCAGAAC	Bra034020	A02	-	9144127	9150027	5125	annot_exons
miR2275-x	novel_circ_000280	515	532	-18.7	0.6538	GAUCCUCCUUUUCGUUGU	x|x||||||||||x|||x	AUCGGAGGAAAAGAAACU	NA	A02	+	11812687	11814766	2080	intergenic
miR5021-x	novel_circ_000294	2991	3008	-22.5	0.7475	UUCUUCUUCUUCUUCUCC	o||||||x||||||||xx	GAGAAGACGAAGAAGAAC	Bra008327	A02	+	13738783	13742661	3879	antisense
miR5021-x	novel_circ_000299	27	44	-20.8	0.6957	CUCUUCUGCUUCGCUCUG	||||||||||||xxox||	GAGAAGACGAAGAAGAAC	NA	A02	+	15589798	15592043	2246	intergenic
miR824-x	novel_circ_000300	2244	2262	-17.5	0.614	AACUGAUAAACACUCUCGA	|x|||x||||||||||xo|	UAGACCAUUUGUGAGAAUU	Bra033135	A02	-	16489483	16492693	3211	antisense
novel-m0854-3p	novel_circ_000300	817	837	-18	0.6667	UUUGUUCUCCUUGUUUAUCUU	o||x|x||||||||||||x||	GAAAAUGAGGAACAAAUAAAA	Bra033135	A02	-	16489483	16492693	3211	antisense
miR5153-y	novel_circ_000306	67	85	-25.3	0.697	CGUCUAAGGUGAGGGAGCA	||o|||||||||xx|x|||	GCGGAUUCCACUAACACGU	Bra022022	A02	+	18290119	18290338	220	antisense
novel-m0316-3p	novel_circ_000319	4501	4521	-28.1	0.6854	UCGUCUCUUUGUGUCUCCCCG	||||||||o|||x||||xx||	AGCAGAGAGACAGAGAGAAGC	Bra033102	A02	-	22685817	22692525	4835	exon_intron
miR5021-x	novel_circ_000323	1503	1520	-22.5	0.745	UUCUUCUUCUUCUUCUUC	o||||||x|||||||||x	GAGAAGACGAAGAAGAAC	Bra020469	A02	+	24645864	24648791	2342	exon_intron
novel-m0062-5p	novel_circ_000324	6833	6853	-21.7	0.7068	AUUUGAGAACUUAUUUAGUAU	|o|||x|||||||||||||||	UGAACCCUUGAAUAAAUCAUA	Bra029356	A02	+	25103670	25115749	12080	antisense
novel-m0071-5p	novel_circ_000324	6833	6853	-21.7	0.7068	AUUUGAGAACUUAUUUAGUAU	|o|||x|||||||||||||||	UGAACCCUUGAAUAAAUCAUA	Bra029356	A02	+	25103670	25115749	12080	antisense
novel-m0350-5p	novel_circ_000324	6192	6212	-30	0.9288	ACUUGGGUUCUUAUUGAGAUU	||||||||||||||||||xxx	UGAACCCAAGAAUAACUCAUU	Bra029356	A02	+	25103670	25115749	12080	antisense
novel-m0362-5p	novel_circ_000324	6833	6853	-21.7	0.7068	AUUUGAGAACUUAUUUAGUAU	|o|||x|||||||||||||||	UGAACCCUUGAAUAAAUCAUA	Bra029356	A02	+	25103670	25115749	12080	antisense
novel-m0370-5p	novel_circ_000324	6833	6853	-21.7	0.7068	AUUUGAGAACUUAUUUAGUAU	|o|||x|||||||||||||||	UGAACCCUUGAAUAAAUCAUA	Bra029356	A02	+	25103670	25115749	12080	antisense
novel-m0383-3p	novel_circ_000324	1016	1036	-22.1	0.6443	UUUACGUAGUGAACUUCUCCA	||||||||||||x|o|x|||x	AAAUGCAUCACUAGGAAAGGA	Bra029356	A02	+	25103670	25115749	12080	antisense
novel-m0420-5p	novel_circ_000324	6833	6853	-21.7	0.7068	AUUUGAGAACUUAUUUAGUAU	|o|||x|||||||||||||||	UGAACCCUUGAAUAAAUCAUA	Bra029356	A02	+	25103670	25115749	12080	antisense
novel-m0483-5p	novel_circ_000324	6833	6853	-21.7	0.7068	AUUUGAGAACUUAUUUAGUAU	|o|||x|||||||||||||||	UGAACCCUUGAAUAAAUCAUA	Bra029356	A02	+	25103670	25115749	12080	antisense
novel-m0583-5p	novel_circ_000324	6833	6853	-21.7	0.7068	AUUUGAGAACUUAUUUAGUAU	|o|||x|||||||||||||||	UGAACCCUUGAAUAAAUCAUA	Bra029356	A02	+	25103670	25115749	12080	antisense
novel-m0635-5p	novel_circ_000324	6833	6853	-21.7	0.7068	AUUUGAGAACUUAUUUAGUAU	|o|||x|||||||||||||||	UGAACCCUUGAAUAAAUCAUA	Bra029356	A02	+	25103670	25115749	12080	antisense
novel-m0676-5p	novel_circ_000324	6833	6853	-21.7	0.7068	AUUUGAGAACUUAUUUAGUAU	|o|||x|||||||||||||||	UGAACCCUUGAAUAAAUCAUA	Bra029356	A02	+	25103670	25115749	12080	antisense
novel-m0694-5p	novel_circ_000324	6833	6853	-21.7	0.7068	AUUUGAGAACUUAUUUAGUAU	|o|||x|||||||||||||||	UGAACCCUUGAAUAAAUCAUA	Bra029356	A02	+	25103670	25115749	12080	antisense
novel-m0754-5p	novel_circ_000324	6851	6871	-27.8	0.7165	UUUGGAAAUCCAUUUGGGAUU	|||||x||o||||||||||o|	AAACCCUUGGGUAAACCCUGA	Bra029356	A02	+	25103670	25115749	12080	antisense
novel-m0890-5p	novel_circ_000324	6833	6853	-21.7	0.7068	AUUUGAGAACUUAUUUAGUAU	|o|||x|||||||||||||||	UGAACCCUUGAAUAAAUCAUA	Bra029356	A02	+	25103670	25115749	12080	antisense
novel-m0946-5p	novel_circ_000324	6833	6853	-21.7	0.7068	AUUUGAGAACUUAUUUAGUAU	|o|||x|||||||||||||||	UGAACCCUUGAAUAAAUCAUA	Bra029356	A02	+	25103670	25115749	12080	antisense
miR5021-x	novel_circ_000325	1042	1059	-22.8	0.755	CUCCUCUGCUUCUUCUCC	|||x||||||||||||xx	GAGAAGACGAAGAAGAAC	Bra029326	A02	-	25309412	25315279	5015	exon_intron
novel-m0067-3p	novel_circ_000330	675	695	-17	0.605	UCUAUCUACACACUAUUCCUG	|x|||x||||||xx|||||||	AAAUAUAUGUGUAUUAAGGAC	Bra031874	A02	-	26455225	26456033	724	exon_intron
novel-m0650-3p	novel_circ_000330	675	695	-17	0.605	UCUAUCUACACACUAUUCCUG	|x|||x||||||xx|||||||	AAAUAUAUGUGUAUUAAGGAC	Bra031874	A02	-	26455225	26456033	724	exon_intron
miR5153-y	novel_circ_000334	5900	5918	-30.3	0.8347	CGCCCGGGGUGAUUGUGCA	||||xoo||||||||||||	GCGGAUUCCACUAACACGU	Bra005938	A03	+	1316508	1327337	10830	antisense
novel-m0156-3p	novel_circ_000336	4330	4350	-33.1	1	GGUUUUGGUGGGUAUUUCAAA	|||||||||||||||||||||	CCAAAACCACCCAUAAAGUUU	Bra005998	A03	-	1542139	1551368	9230	exon_intron
novel-m0716-3p	novel_circ_000336	4330	4350	-33.1	1	GGUUUUGGUGGGUAUUUCAAA	|||||||||||||||||||||	CCAAAACCACCCAUAAAGUUU	Bra005998	A03	-	1542139	1551368	9230	exon_intron
novel-m0797-3p	novel_circ_000336	4330	4350	-33.1	1	GGUUUUGGUGGGUAUUUCAAA	|||||||||||||||||||||	CCAAAACCACCCAUAAAGUUU	Bra005998	A03	-	1542139	1551368	9230	exon_intron
miR7121-x	novel_circ_000339	746	763	-23.8	0.6959	GAGGAGGAACACUUGACG	||||||o|x|||||||x|	CUCCUCUUGGUGAACUCC	Bra006035	A03	-	1697755	1699156	763	annot_exons
miR319-x	novel_circ_000346	1862	1880	-24.7	0.6676	CUCGUUAGAAGCCAGCUUA	||||xx|||||||||x|x|	GAGCUUUCUUCGGUCCACU	Bra006215	A03	-	2552413	2558523	5607	exon_intron
miR319-x	novel_circ_000347	1868	1886	-24.7	0.6676	CUCGUUAGAAGCCAGCUUA	||||xx|||||||||x|x|	GAGCUUUCUUCGGUCCACU	Bra006215	A03	-	2552419	2558529	5607	exon_intron
miR2275-x	novel_circ_000350	2655	2672	-19.2	0.6713	UUGUCUCCUUUACUUUGA	|x|o|||||||x||||||	AUCGGAGGAAAAGAAACU	Bra006348	A03	+	3119311	3132090	12780	exon_intron
miR5656-y	novel_circ_000351	5806	5823	-22	0.6567	GCCCUUCGUCUCUGAACC	x|x||||o|||||||x||	AGUGAAGUAGAGACUGGG	Bra006347	A03	-	3119311	3132090	9033	exon_intron
miR5658-x	novel_circ_000351	7940	7959	-23.4	0.7312	CUAGUACUUCUUCUGCUACC	|||o||||x||x|||||||x	GAUUAUGAUGAUGACGAUGA	Bra006347	A03	-	3119311	3132090	9033	exon_intron
miR3437-y	novel_circ_000353	1215	1233	-18.1	0.6606	UAGCUACCAACAAUAGCAA	||||o|||x||||||ox||	AUCGGUGGAUGUUAUUUUU	Bra006386	A03	+	3287284	3298157	10874	antisense
miR5568-x	novel_circ_000353	9068	9087	-18	0.6164	CAAAGUUUAAUAAACAGCAA	|||x||||||||x|||||||	GUUCCAAAUUAUAUGUCGUU	Bra006386	A03	+	3287284	3298157	10874	antisense
miR319-x	novel_circ_000362	3327	3345	-25.2	0.6904	CUCGGAAGAAGCCAUUUGU	||||o|||||||||xx||x	GAGCUUUCUUCGGUCCACU	Bra006452	A03	-	3543498	3555243	10648	exon_intron
miR5021-x	novel_circ_000362	4806	4823	-25.5	0.8528	CUCUUCUGCUUCUUCAAC	|||||||||||||||xxx	GAGAAGACGAAGAAGAAC	Bra006452	A03	-	3543498	3555243	10648	exon_intron
miR5021-x	novel_circ_000362	7640	7657	-24.6	0.791	GUCUUCUGCUUCUUCUAC	x|||||||||||||||xx	GAGAAGACGAAGAAGAAC	Bra006452	A03	-	3543498	3555243	10648	exon_intron
miR529-x	novel_circ_000362	8299	8316	-26.3	0.6337	CACUCUCUCCUGAAGGAG	|x||||||||||xx||||	GCGAGAGAGGACCGCCUC	Bra006452	A03	-	3543498	3555243	10648	exon_intron
miR825-x	novel_circ_000362	1218	1239	-34.4	0.7872	GGUUUGUGGUCGAACUUCUUCG	o|||o||||||||x||||||||	UCAAGCACCAGCUCGAAGAAGC	Bra006452	A03	-	3543498	3555243	10648	exon_intron
novel-m0127-5p	novel_circ_000362	4750	4770	-24.4	0.6421	GCUAAGUCCUAAGAUUGGCGG	o|||||||||||x|x|x||||	UGAUUCAGGAUUGUCAACGCC	Bra006452	A03	-	3543498	3555243	10648	exon_intron
miR2275-x	novel_circ_000366	6790	6807	-17.8	0.6202	UAGUCUUCUUUAUUUUGA	|||o||o||||xo|||||	AUCGGAGGAAAAGAAACU	Bra006679	A03	-	4590285	4599235	8689	exon_intron
miR2275-x	novel_circ_000367	6914	6931	-17.8	0.6202	UAGUCUUCUUUAUUUUGA	|||o||o||||xo|||||	AUCGGAGGAAAAGAAACU	Bra006679	A03	-	4590554	4599600	8544	exon_intron
miR2275-x	novel_circ_000368	7406	7423	-17.8	0.6202	UAGUCUUCUUUAUUUUGA	|||o||o||||xo|||||	AUCGGAGGAAAAGAAACU	Bra006679	A03	-	4591555	4600650	8035	exon_intron
miR2275-x	novel_circ_000369	7502	7519	-17.8	0.6202	UAGUCUUCUUUAUUUUGA	|||o||o||||xo|||||	AUCGGAGGAAAAGAAACU	Bra006679	A03	-	4591555	4600746	8131	exon_intron
miR11470-x	novel_circ_000374	113	131	-19.8	0.6622	CGACCCUAACUCGUAACUA	xo|x||||||||x||||||	CUUUGGAUUGAGGAUUGAU	Bra028949	A03	-	5562808	5582472	19152	exon_intron
miR319-x	novel_circ_000374	8086	8104	-26.5	0.7162	CUCGAAAGAAGUGAGGAAA	|||||||||||ox|||xx|	GAGCUUUCUUCGGUCCACU	Bra028949	A03	-	5562808	5582472	19152	exon_intron
miR5021-x	novel_circ_000374	524	541	-20.7	0.6656	CUCUUCUUCUUUUUCCUU	|||||||x|||o|||x|x	GAGAAGACGAAGAAGAAC	Bra028949	A03	-	5562808	5582472	19152	exon_intron
miR5021-x	novel_circ_000374	1373	1390	-20.3	0.6789	CUCUUCUUUUUCUUCUUC	|||||||xo||||||||x	GAGAAGACGAAGAAGAAC	Bra028949	A03	-	5562808	5582472	19152	exon_intron
miR1134-y	novel_circ_000380	41	59	-18.1	0.6115	UUCGUCUUCUUCUCUUCCU	|||||x|||||||xo|x||	AAGCACAAGAAGAAGAAGA	Bra029068	A03	-	6186325	6186517	193	antisense
novel-m0048-5p	novel_circ_000399	5437	5457	-24.9	0.6785	UCCCAAAUCUCAAUUCCCCAC	||x||||||||||o|||x|||	AGAGUUUAGAGUUGAGGAGUG	Bra000121	A03	-	9390145	9402906	9600	exon_intron
novel-m0101-3p	novel_circ_000399	5437	5457	-27.6	0.8023	UCCCAAAUCUCAAUUCCCCAC	|x|x|||||||||||||||||	AUGAUUUAGAGUUAAGGGGUG	Bra000121	A03	-	9390145	9402906	9600	exon_intron
novel-m0117-3p	novel_circ_000399	5437	5457	-24.9	0.6785	UCCCAAAUCUCAAUUCCCCAC	||x||||||||||o|||x|||	AGAGUUUAGAGUUGAGGAGUG	Bra000121	A03	-	9390145	9402906	9600	exon_intron
novel-m0673-3p	novel_circ_000399	5437	5457	-24.9	0.6785	UCCCAAAUCUCAAUUCCCCAC	||x||||||||||o|||x|||	AGAGUUUAGAGUUGAGGAGUG	Bra000121	A03	-	9390145	9402906	9600	exon_intron
novel-m0766-3p	novel_circ_000399	5437	5457	-24.9	0.6785	UCCCAAAUCUCAAUUCCCCAC	||x||||||||||o|||x|||	AGAGUUUAGAGUUGAGGAGUG	Bra000121	A03	-	9390145	9402906	9600	exon_intron
novel-m0048-5p	novel_circ_000400	6085	6105	-24.9	0.6785	UCCCAAAUCUCAAUUCCCCAC	||x||||||||||o|||x|||	AGAGUUUAGAGUUGAGGAGUG	Bra000121	A03	-	9390582	9403554	10778	exon_intron
novel-m0101-3p	novel_circ_000400	6085	6105	-27.6	0.8023	UCCCAAAUCUCAAUUCCCCAC	|x|x|||||||||||||||||	AUGAUUUAGAGUUAAGGGGUG	Bra000121	A03	-	9390582	9403554	10778	exon_intron
novel-m0117-3p	novel_circ_000400	6085	6105	-24.9	0.6785	UCCCAAAUCUCAAUUCCCCAC	||x||||||||||o|||x|||	AGAGUUUAGAGUUGAGGAGUG	Bra000121	A03	-	9390582	9403554	10778	exon_intron
novel-m0673-3p	novel_circ_000400	6085	6105	-24.9	0.6785	UCCCAAAUCUCAAUUCCCCAC	||x||||||||||o|||x|||	AGAGUUUAGAGUUGAGGAGUG	Bra000121	A03	-	9390582	9403554	10778	exon_intron
novel-m0766-3p	novel_circ_000400	6085	6105	-24.9	0.6785	UCCCAAAUCUCAAUUCCCCAC	||x||||||||||o|||x|||	AGAGUUUAGAGUUGAGGAGUG	Bra000121	A03	-	9390582	9403554	10778	exon_intron
novel-m0048-5p	novel_circ_000401	20140	20160	-24.9	0.6785	UCCCAAAUCUCAAUUCCCCAC	||x||||||||||o|||x|||	AGAGUUUAGAGUUGAGGAGUG	Bra000122	A03	-	9390859	9419242	26751	exon_intron
novel-m0101-3p	novel_circ_000401	20140	20160	-27.6	0.8023	UCCCAAAUCUCAAUUCCCCAC	|x|x|||||||||||||||||	AUGAUUUAGAGUUAAGGGGUG	Bra000122	A03	-	9390859	9419242	26751	exon_intron
novel-m0117-3p	novel_circ_000401	20140	20160	-24.9	0.6785	UCCCAAAUCUCAAUUCCCCAC	||x||||||||||o|||x|||	AGAGUUUAGAGUUGAGGAGUG	Bra000122	A03	-	9390859	9419242	26751	exon_intron
novel-m0310-3p	novel_circ_000401	9146	9166	-24.4	0.7649	UUGUGGUAACCUCGUUUUCAA	x|x|||||||||||||||x||	UAAACCAUUGGAGCAAAACUU	Bra000122	A03	-	9390859	9419242	26751	exon_intron
novel-m0516-3p	novel_circ_000401	10152	10173	-41	0.9131	CGCUAACCAUCGCCAACUGUCG	x||o||||||||||||||||||	ACGGUUGGUAGCGGUUGACAGC	Bra000122	A03	-	9390859	9419242	26751	exon_intron
novel-m0657-3p	novel_circ_000401	10152	10173	-41	0.9131	CGCUAACCAUCGCCAACUGUCG	x||o||||||||||||||||||	ACGGUUGGUAGCGGUUGACAGC	Bra000122	A03	-	9390859	9419242	26751	exon_intron
novel-m0673-3p	novel_circ_000401	20140	20160	-24.9	0.6785	UCCCAAAUCUCAAUUCCCCAC	||x||||||||||o|||x|||	AGAGUUUAGAGUUGAGGAGUG	Bra000122	A03	-	9390859	9419242	26751	exon_intron
novel-m0766-3p	novel_circ_000401	20140	20160	-24.9	0.6785	UCCCAAAUCUCAAUUCCCCAC	||x||||||||||o|||x|||	AGAGUUUAGAGUUGAGGAGUG	Bra000122	A03	-	9390859	9419242	26751	exon_intron
novel-m0859-5p	novel_circ_000401	9367	9389	-26.5	0.6355	UUCUGGUAGAGGUUCCCGUGAGA	||||||||||||||x|xo||x||	AAGACCAUCUCCAAUGCUACACU	Bra000122	A03	-	9390859	9419242	26751	exon_intron
bra-miR824	novel_circ_000413	2863	2883	-26.6	0.7112	UUUUGGUAAACACUCUCGCCU	x|o|||||||||||||xx|||	UAGACCAUUUGUGAGAAGGGA	Bra000592	A03	-	11957303	11962955	5582	exon_intron
novel-m0194-5p	novel_circ_000413	2867	2887	-27.2	0.7727	GCAGUUUUGGUAAACACUCUC	o|||x|o|||||||||||||x	UGUCUAGACCAUUUGUGAGAA	Bra000592	A03	-	11957303	11962955	5582	exon_intron
bra-miR824	novel_circ_000414	3339	3359	-26.6	0.7112	UUUUGGUAAACACUCUCGCCU	x|o|||||||||||||xx|||	UAGACCAUUUGUGAGAAGGGA	Bra000592	A03	-	11957855	11963501	5506	exon_intron
novel-m0194-5p	novel_circ_000414	3343	3363	-27.2	0.7727	GCAGUUUUGGUAAACACUCUC	o|||x|o|||||||||||||x	UGUCUAGACCAUUUGUGAGAA	Bra000592	A03	-	11957855	11963501	5506	exon_intron
miR1134-y	novel_circ_000427	33204	33222	-22	0.7309	UUCUUCUUCUUCUCCUUCU	|||x|x|||||||x|||||	AAGCACAAGAAGAAGAAGA	Bra001091	A03	-	14704476	14759748	53547	exon_intron
miR3511-x	novel_circ_000427	52571	52588	-21	0.7167	UUCCGGUAGUUCCUUCUC	||||||||x||x|||||x	AAGGCCAUGAAUGAAGAA	Bra001091	A03	-	14704476	14759748	53547	exon_intron
miR5021-x	novel_circ_000427	48276	48293	-21.8	0.701	CUCUUUUGCUUCUUGGUG	|||||o||||||||xx||	GAGAAGACGAAGAAGAAC	Bra001091	A03	-	14704476	14759748	53547	exon_intron
miR5656-y	novel_circ_000427	1216	1233	-20.8	0.6284	UGACUUCGUCUCGGACAC	|x|||||o||||x|||x|	AGUGAAGUAGAGACUGGG	Bra001091	A03	-	14704476	14759748	53547	exon_intron
miR6031-x	novel_circ_000427	5343	5366	-45.1	1	UACUCUAAGCCUCGCCAAACUUCG	||||||||||||||||||||||||	AUGAGAUUCGGAGCGGUUUGAAGC	Bra001091	A03	-	14704476	14759748	53547	exon_intron
novel-m0051-5p	novel_circ_000427	5337	5359	-23.2	0.6203	AGCCUCGCCAAACUUCGCCAAAU	|o|x||||x||||x|||||||||	UUGAAGCGAUUUGUAGCGGUUUA	Bra001091	A03	-	14704476	14759748	53547	exon_intron
bra-miR156a-3p	novel_circ_000438	7987	8007	-31.8	0.7681	CGAGUGAGAGAGAGAGAGAGA	|||o|||||||||||x||x|x	GCUUACUCUCUCUCUGUCACC	Bra001526	A03	+	16873223	16884001	9659	exon_intron
miR7121-x	novel_circ_000438	4906	4923	-22.4	0.64	GAGGAGAAUCACUAAAGA	||||||||o||||xx||x	CUCCUCUUGGUGAACUCC	Bra001526	A03	+	16873223	16884001	9659	exon_intron
novel-m0840-3p	novel_circ_000438	1063	1083	-23.1	0.6619	AGGUAGUGAAGUAAAAGGAGG	|o|||||||||||||x||x|o	UUCAUCACUUCAUUUCCCACU	Bra001526	A03	+	16873223	16884001	9659	exon_intron
bra-miR156a-3p	novel_circ_000440	7987	8007	-31.8	0.7681	CGAGUGAGAGAGAGAGAGAGA	|||o|||||||||||x||x|x	GCUUACUCUCUCUCUGUCACC	Bra001526	A03	+	16873223	16895673	21331	exon_intron
bra-miR156a-3p	novel_circ_000440	18940	18960	-31.8	0.7681	CGAGUGAGAGAGAGAGAGAGA	|||o|||||||||||x||x|x	GCUUACUCUCUCUCUGUCACC	Bra001526	A03	+	16873223	16895673	21331	exon_intron
miR7121-x	novel_circ_000440	4906	4923	-22.4	0.64	GAGGAGAAUCACUAAAGA	||||||||o||||xx||x	CUCCUCUUGGUGAACUCC	Bra001526	A03	+	16873223	16895673	21331	exon_intron
miR7121-x	novel_circ_000440	15140	15157	-22.4	0.64	GAGGAGAAUCACUAAAGA	||||||||o||||xx||x	CUCCUCUUGGUGAACUCC	Bra001526	A03	+	16873223	16895673	21331	exon_intron
novel-m0840-3p	novel_circ_000440	1063	1083	-23.1	0.6619	AGGUAGUGAAGUAAAAGGAGG	|o|||||||||||||x||x|o	UUCAUCACUUCAUUUCCCACU	Bra001526	A03	+	16873223	16895673	21331	exon_intron
miR3699-y	novel_circ_000441	6264	6281	-18.6	0.6838	CACUGUGUUCUUUGUCGA	x|||||x||||||x||o|	UUGACAGAAGAAAGAGUU	Bra001525	A03	-	16873223	16895673	19794	exon_intron
bra-miR156a-3p	novel_circ_000442	7984	8004	-31.8	0.7681	CGAGUGAGAGAGAGAGAGAGA	|||o|||||||||||x||x|x	GCUUACUCUCUCUCUGUCACC	Bra001526	A03	+	16873226	16884004	9659	exon_intron
miR7121-x	novel_circ_000442	4903	4920	-22.4	0.64	GAGGAGAAUCACUAAAGA	||||||||o||||xx||x	CUCCUCUUGGUGAACUCC	Bra001526	A03	+	16873226	16884004	9659	exon_intron
novel-m0840-3p	novel_circ_000442	1060	1080	-23.1	0.6619	AGGUAGUGAAGUAAAAGGAGG	|o|||||||||||||x||x|o	UUCAUCACUUCAUUUCCCACU	Bra001526	A03	+	16873226	16884004	9659	exon_intron
miR3699-y	novel_circ_000445	6003	6020	-18.6	0.6838	CACUGUGUUCUUUGUCGA	x|||||x||||||x||o|	UUGACAGAAGAAAGAGUU	Bra001525	A03	-	16873231	16895412	19525	exon_intron
bra-miR395a-5p	novel_circ_000446	620	640	-24.2	0.6221	CUAGGAGACUCAGUAAGUAAC	|x|||||||||xxx|||||||	GUUCCUCUGAGCACUUCAUUG	Bra001537	A03	+	16930657	16931383	727	antisense
bra-miR395b-5p	novel_circ_000446	620	640	-24.2	0.6221	CUAGGAGACUCAGUAAGUAAC	|x|||||||||xxx|||||||	GUUCCUCUGAGCACUUCAUUG	Bra001537	A03	+	16930657	16931383	727	antisense
bra-miR395c-5p	novel_circ_000446	620	640	-24.2	0.6221	CUAGGAGACUCAGUAAGUAAC	|x|||||||||xxx|||||||	GUUCCUCUGAGCACUUCAUUG	Bra001537	A03	+	16930657	16931383	727	antisense
bra-miR395d-5p	novel_circ_000446	620	640	-24.2	0.6221	CUAGGAGACUCAGUAAGUAAC	|x|||||||||xxx|||||||	GUUCCUCUGAGCACUUCAUUG	Bra001537	A03	+	16930657	16931383	727	antisense
novel-m0126-5p	novel_circ_000446	624	644	-24.5	0.625	AUCUCUAGGAGACUCAGUAAG	|||||x|||||||||xxx|||	UAGAGUUCCUCUGAGCACUUC	Bra001537	A03	+	16930657	16931383	727	antisense
novel-m0588-5p	novel_circ_000446	621	641	-21.5	0.6214	UCUAGGAGACUCAGUAAGUAA	|||||||||||xxxx||||||	AGAUCCUCUGAACACUUCAUU	Bra001537	A03	+	16930657	16931383	727	antisense
novel-m0617-5p	novel_circ_000446	624	644	-24.5	0.625	AUCUCUAGGAGACUCAGUAAG	|||||x|||||||||xxx|||	UAGAGUUCCUCUGAGCACUUC	Bra001537	A03	+	16930657	16931383	727	antisense
novel-m0689-5p	novel_circ_000446	624	644	-24.5	0.625	AUCUCUAGGAGACUCAGUAAG	|||||x|||||||||xxx|||	UAGAGUUCCUCUGAGCACUUC	Bra001537	A03	+	16930657	16931383	727	antisense
novel-m0064-5p	novel_circ_000447	14011	14033	-34.6	0.9914	UAUUGUACCUAGAAAAUCCUUGC	||||||||||||||||||||||x	AUAACAUGGAUCUUUUAGGAACA	Bra001676	A03	+	17816254	17838291	21013	exon_intron
novel-m0632-3p	novel_circ_000447	14011	14033	-34.6	0.9914	UAUUGUACCUAGAAAAUCCUUGC	||||||||||||||||||||||x	AUAACAUGGAUCUUUUAGGAACA	Bra001676	A03	+	17816254	17838291	21013	exon_intron
novel-m0633-3p	novel_circ_000447	14011	14033	-34.6	0.9914	UAUUGUACCUAGAAAAUCCUUGC	||||||||||||||||||||||x	AUAACAUGGAUCUUUUAGGAACA	Bra001676	A03	+	17816254	17838291	21013	exon_intron
novel-m0064-5p	novel_circ_000449	13487	13509	-34.6	0.9914	UAUUGUACCUAGAAAAUCCUUGC	||||||||||||||||||||||x	AUAACAUGGAUCUUUUAGGAACA	Bra001676	A03	+	17816778	17839363	21561	exon_intron
novel-m0632-3p	novel_circ_000449	13487	13509	-34.6	0.9914	UAUUGUACCUAGAAAAUCCUUGC	||||||||||||||||||||||x	AUAACAUGGAUCUUUUAGGAACA	Bra001676	A03	+	17816778	17839363	21561	exon_intron
novel-m0633-3p	novel_circ_000449	13487	13509	-34.6	0.9914	UAUUGUACCUAGAAAAUCCUUGC	||||||||||||||||||||||x	AUAACAUGGAUCUUUUAGGAACA	Bra001676	A03	+	17816778	17839363	21561	exon_intron
novel-m0135-3p	novel_circ_000453	16092	16112	-24.2	0.7832	AUCCUAAAUCCCAAAUCACAA	||x||||||||||||||xx||	UAUGAUUUAGGGUUUAGGAUU	Bra001726	A03	+	18086873	18106311	17092	exon_intron
novel-m0135-3p	novel_circ_000453	16113	16133	-24.2	0.7832	AUCCUAAAUCCCAAAUCCCUA	||x|||||||||||||||xx|	UAUGAUUUAGGGUUUAGGAUU	Bra001726	A03	+	18086873	18106311	17092	exon_intron
novel-m0350-5p	novel_circ_000453	15872	15892	-30	0.9259	ACUUGGGUUCUUAUUGAGAUA	||||||||||||||||||xx|	UGAACCCAAGAAUAACUCAUU	Bra001726	A03	+	18086873	18106311	17092	exon_intron
novel-m0399-3p	novel_circ_000453	16088	16108	-31.7	0.9784	UAAAUCCCAAAUCACAAAACG	|||||||||||||x|x||x|x	AUUUAGGGUUUAGGGAUUAGA	Bra001726	A03	+	18086873	18106311	17092	exon_intron
novel-m0399-3p	novel_circ_000453	16109	16129	-31.7	0.9814	UAAAUCCCAAAUCCCUAAUCC	||||||||||||||||||||x	AUUUAGGGUUUAGGGAUUAGA	Bra001726	A03	+	18086873	18106311	17092	exon_intron
novel-m0760-3p	novel_circ_000453	16092	16113	-26.8	0.8508	AAUCCUAAAUCCCAAAUCACAA	||||||||||||x|||||||||	UUAGGAUUUAGGAUUUAGUGUU	Bra001726	A03	+	18086873	18106311	17092	exon_intron
novel-m0760-3p	novel_circ_000453	16120	16141	-26.8	0.8454	AAUCCCAAAUCCUAAAUCCCAA	|||||x||||||||||||x|||	UUAGGAUUUAGGAUUUAGUGUU	Bra001726	A03	+	18086873	18106311	17092	exon_intron
novel-m0812-3p	novel_circ_000453	16088	16108	-31.7	0.9784	UAAAUCCCAAAUCACAAAACG	|||||||||||||x|x||x|x	AUUUAGGGUUUAGGGAUUAGA	Bra001726	A03	+	18086873	18106311	17092	exon_intron
novel-m0812-3p	novel_circ_000453	16109	16129	-31.7	0.9814	UAAAUCCCAAAUCCCUAAUCC	||||||||||||||||||||x	AUUUAGGGUUUAGGGAUUAGA	Bra001726	A03	+	18086873	18106311	17092	exon_intron
novel-m0135-3p	novel_circ_000454	16092	16112	-24.2	0.7832	AUCCUAAAUCCCAAAUCACAA	||x||||||||||||||xx||	UAUGAUUUAGGGUUUAGGAUU	Bra001726	A03	+	18086873	18107462	18243	exon_intron
novel-m0135-3p	novel_circ_000454	16113	16133	-24.2	0.7832	AUCCUAAAUCCCAAAUCCCUA	||x|||||||||||||||xx|	UAUGAUUUAGGGUUUAGGAUU	Bra001726	A03	+	18086873	18107462	18243	exon_intron
novel-m0350-5p	novel_circ_000454	15872	15892	-30	0.9259	ACUUGGGUUCUUAUUGAGAUA	||||||||||||||||||xx|	UGAACCCAAGAAUAACUCAUU	Bra001726	A03	+	18086873	18107462	18243	exon_intron
novel-m0399-3p	novel_circ_000454	16088	16108	-31.7	0.9784	UAAAUCCCAAAUCACAAAACG	|||||||||||||x|x||x|x	AUUUAGGGUUUAGGGAUUAGA	Bra001726	A03	+	18086873	18107462	18243	exon_intron
novel-m0399-3p	novel_circ_000454	16109	16129	-31.7	0.9814	UAAAUCCCAAAUCCCUAAUCC	||||||||||||||||||||x	AUUUAGGGUUUAGGGAUUAGA	Bra001726	A03	+	18086873	18107462	18243	exon_intron
novel-m0760-3p	novel_circ_000454	16092	16113	-26.8	0.8508	AAUCCUAAAUCCCAAAUCACAA	||||||||||||x|||||||||	UUAGGAUUUAGGAUUUAGUGUU	Bra001726	A03	+	18086873	18107462	18243	exon_intron
novel-m0760-3p	novel_circ_000454	16120	16141	-26.8	0.8454	AAUCCCAAAUCCUAAAUCCCAA	|||||x||||||||||||x|||	UUAGGAUUUAGGAUUUAGUGUU	Bra001726	A03	+	18086873	18107462	18243	exon_intron
novel-m0812-3p	novel_circ_000454	16088	16108	-31.7	0.9784	UAAAUCCCAAAUCACAAAACG	|||||||||||||x|x||x|x	AUUUAGGGUUUAGGGAUUAGA	Bra001726	A03	+	18086873	18107462	18243	exon_intron
novel-m0812-3p	novel_circ_000454	16109	16129	-31.7	0.9814	UAAAUCCCAAAUCCCUAAUCC	||||||||||||||||||||x	AUUUAGGGUUUAGGGAUUAGA	Bra001726	A03	+	18086873	18107462	18243	exon_intron
novel-m0135-3p	novel_circ_000455	16092	16112	-24.2	0.7832	AUCCUAAAUCCCAAAUCACAA	||x||||||||||||||xx||	UAUGAUUUAGGGUUUAGGAUU	Bra001726	A03	+	18086873	18107519	18300	exon_intron
novel-m0135-3p	novel_circ_000455	16113	16133	-24.2	0.7832	AUCCUAAAUCCCAAAUCCCUA	||x|||||||||||||||xx|	UAUGAUUUAGGGUUUAGGAUU	Bra001726	A03	+	18086873	18107519	18300	exon_intron
novel-m0350-5p	novel_circ_000455	15872	15892	-30	0.9259	ACUUGGGUUCUUAUUGAGAUA	||||||||||||||||||xx|	UGAACCCAAGAAUAACUCAUU	Bra001726	A03	+	18086873	18107519	18300	exon_intron
novel-m0399-3p	novel_circ_000455	16088	16108	-31.7	0.9784	UAAAUCCCAAAUCACAAAACG	|||||||||||||x|x||x|x	AUUUAGGGUUUAGGGAUUAGA	Bra001726	A03	+	18086873	18107519	18300	exon_intron
novel-m0399-3p	novel_circ_000455	16109	16129	-31.7	0.9814	UAAAUCCCAAAUCCCUAAUCC	||||||||||||||||||||x	AUUUAGGGUUUAGGGAUUAGA	Bra001726	A03	+	18086873	18107519	18300	exon_intron
novel-m0760-3p	novel_circ_000455	16092	16113	-26.8	0.8508	AAUCCUAAAUCCCAAAUCACAA	||||||||||||x|||||||||	UUAGGAUUUAGGAUUUAGUGUU	Bra001726	A03	+	18086873	18107519	18300	exon_intron
novel-m0760-3p	novel_circ_000455	16120	16141	-26.8	0.8454	AAUCCCAAAUCCUAAAUCCCAA	|||||x||||||||||||x|||	UUAGGAUUUAGGAUUUAGUGUU	Bra001726	A03	+	18086873	18107519	18300	exon_intron
novel-m0812-3p	novel_circ_000455	16088	16108	-31.7	0.9784	UAAAUCCCAAAUCACAAAACG	|||||||||||||x|x||x|x	AUUUAGGGUUUAGGGAUUAGA	Bra001726	A03	+	18086873	18107519	18300	exon_intron
novel-m0812-3p	novel_circ_000455	16109	16129	-31.7	0.9814	UAAAUCCCAAAUCCCUAAUCC	||||||||||||||||||||x	AUUUAGGGUUUAGGGAUUAGA	Bra001726	A03	+	18086873	18107519	18300	exon_intron
novel-m0062-5p	novel_circ_000480	1059	1079	-21.8	0.7171	ACUUGGGUUCUUAUUGAGUAU	|||||||xx||||||x|||||	UGAACCCUUGAAUAAAUCAUA	Bra012570	A03	-	23512909	23517152	4244	antisense
novel-m0071-5p	novel_circ_000480	1059	1079	-21.8	0.7171	ACUUGGGUUCUUAUUGAGUAU	|||||||xx||||||x|||||	UGAACCCUUGAAUAAAUCAUA	Bra012570	A03	-	23512909	23517152	4244	antisense
novel-m0135-3p	novel_circ_000480	1270	1290	-28.2	0.9126	AUCCUAAAUCCCAAAUCACAA	||x||||||||||||||xx||	UAUGAUUUAGGGUUUAGGAUU	Bra012570	A03	-	23512909	23517152	4244	antisense
novel-m0135-3p	novel_circ_000480	1291	1311	-28.2	0.9126	AUACUAAAUCCCAAAUCCCUA	||||||||||||||||||xx|	UAUGAUUUAGGGUUUAGGAUU	Bra012570	A03	-	23512909	23517152	4244	antisense
novel-m0135-3p	novel_circ_000480	1388	1408	-21.5	0.6958	AUCCUAAAUCCCAAAUUCCAA	||x|||||||||||||o|x||	UAUGAUUUAGGGUUUAGGAUU	Bra012570	A03	-	23512909	23517152	4244	antisense
novel-m0161-3p	novel_circ_000480	1297	1317	-23.7	0.7315	UCCCAAAUACUAAAUCCCAAA	||x|||||x||||||||||||	AGAGUUUAGGAUUUAGGGUUU	Bra012570	A03	-	23512909	23517152	4244	antisense
novel-m0161-3p	novel_circ_000480	1372	1392	-27	0.8464	UCCAAAAUUCUAAAUCACAAA	||xx||||o|||||||x||||	AGAGUUUAGGAUUUAGGGUUU	Bra012570	A03	-	23512909	23517152	4244	antisense
novel-m0161-3p	novel_circ_000480	1394	1414	-27	0.8491	UCCCAAAUCCUAAAUCCCAAA	||x||||||||||||||||||	AGAGUUUAGGAUUUAGGGUUU	Bra012570	A03	-	23512909	23517152	4244	antisense
novel-m0225-3p	novel_circ_000480	1297	1317	-23.7	0.7315	UCCCAAAUACUAAAUCCCAAA	||x|||||x||||||||||||	AGAGUUUAGGAUUUAGGGUUU	Bra012570	A03	-	23512909	23517152	4244	antisense
novel-m0225-3p	novel_circ_000480	1372	1392	-27	0.8464	UCCAAAAUUCUAAAUCACAAA	||xx||||o|||||||x||||	AGAGUUUAGGAUUUAGGGUUU	Bra012570	A03	-	23512909	23517152	4244	antisense
novel-m0225-3p	novel_circ_000480	1394	1414	-27	0.8491	UCCCAAAUCCUAAAUCCCAAA	||x||||||||||||||||||	AGAGUUUAGGAUUUAGGGUUU	Bra012570	A03	-	23512909	23517152	4244	antisense
novel-m0350-5p	novel_circ_000480	1059	1079	-31.7	0.9814	ACUUGGGUUCUUAUUGAGUAU	||||||||||||||||||||x	UGAACCCAAGAAUAACUCAUU	Bra012570	A03	-	23512909	23517152	4244	antisense
novel-m0362-5p	novel_circ_000480	1059	1079	-21.8	0.7171	ACUUGGGUUCUUAUUGAGUAU	|||||||xx||||||x|||||	UGAACCCUUGAAUAAAUCAUA	Bra012570	A03	-	23512909	23517152	4244	antisense
novel-m0370-5p	novel_circ_000480	1059	1079	-21.8	0.7171	ACUUGGGUUCUUAUUGAGUAU	|||||||xx||||||x|||||	UGAACCCUUGAAUAAAUCAUA	Bra012570	A03	-	23512909	23517152	4244	antisense
novel-m0392-3p	novel_circ_000480	1297	1317	-23.7	0.7315	UCCCAAAUACUAAAUCCCAAA	||x|||||x||||||||||||	AGAGUUUAGGAUUUAGGGUUU	Bra012570	A03	-	23512909	23517152	4244	antisense
novel-m0392-3p	novel_circ_000480	1372	1392	-27	0.8464	UCCAAAAUUCUAAAUCACAAA	||xx||||o|||||||x||||	AGAGUUUAGGAUUUAGGGUUU	Bra012570	A03	-	23512909	23517152	4244	antisense
novel-m0392-3p	novel_circ_000480	1394	1414	-27	0.8491	UCCCAAAUCCUAAAUCCCAAA	||x||||||||||||||||||	AGAGUUUAGGAUUUAGGGUUU	Bra012570	A03	-	23512909	23517152	4244	antisense
novel-m0399-3p	novel_circ_000480	1287	1307	-31.7	0.9814	UAAAUCCCAAAUCCCUAAUCC	||||||||||||||||||||x	AUUUAGGGUUUAGGGAUUAGA	Bra012570	A03	-	23512909	23517152	4244	antisense
novel-m0399-3p	novel_circ_000480	1384	1404	-21.4	0.6646	UAAAUCCCAAAUUCCAAAAUU	||||||||||||o||x||xo|	AUUUAGGGUUUAGGGAUUAGA	Bra012570	A03	-	23512909	23517152	4244	antisense
novel-m0420-5p	novel_circ_000480	1059	1079	-21.8	0.7171	ACUUGGGUUCUUAUUGAGUAU	|||||||xx||||||x|||||	UGAACCCUUGAAUAAAUCAUA	Bra012570	A03	-	23512909	23517152	4244	antisense
novel-m0483-5p	novel_circ_000480	1059	1079	-21.8	0.7171	ACUUGGGUUCUUAUUGAGUAU	|||||||xx||||||x|||||	UGAACCCUUGAAUAAAUCAUA	Bra012570	A03	-	23512909	23517152	4244	antisense
novel-m0583-5p	novel_circ_000480	1059	1079	-21.8	0.7171	ACUUGGGUUCUUAUUGAGUAU	|||||||xx||||||x|||||	UGAACCCUUGAAUAAAUCAUA	Bra012570	A03	-	23512909	23517152	4244	antisense
novel-m0611-5p	novel_circ_000480	1297	1317	-23.7	0.7315	UCCCAAAUACUAAAUCCCAAA	||x|||||x||||||||||||	AGAGUUUAGGAUUUAGGGUUU	Bra012570	A03	-	23512909	23517152	4244	antisense
novel-m0611-5p	novel_circ_000480	1372	1392	-27	0.8464	UCCAAAAUUCUAAAUCACAAA	||xx||||o|||||||x||||	AGAGUUUAGGAUUUAGGGUUU	Bra012570	A03	-	23512909	23517152	4244	antisense
novel-m0611-5p	novel_circ_000480	1394	1414	-27	0.8491	UCCCAAAUCCUAAAUCCCAAA	||x||||||||||||||||||	AGAGUUUAGGAUUUAGGGUUU	Bra012570	A03	-	23512909	23517152	4244	antisense
novel-m0635-5p	novel_circ_000480	1059	1079	-21.8	0.7171	ACUUGGGUUCUUAUUGAGUAU	|||||||xx||||||x|||||	UGAACCCUUGAAUAAAUCAUA	Bra012570	A03	-	23512909	23517152	4244	antisense
novel-m0676-5p	novel_circ_000480	1059	1079	-21.8	0.7171	ACUUGGGUUCUUAUUGAGUAU	|||||||xx||||||x|||||	UGAACCCUUGAAUAAAUCAUA	Bra012570	A03	-	23512909	23517152	4244	antisense
novel-m0694-5p	novel_circ_000480	1059	1079	-21.8	0.7171	ACUUGGGUUCUUAUUGAGUAU	|||||||xx||||||x|||||	UGAACCCUUGAAUAAAUCAUA	Bra012570	A03	-	23512909	23517152	4244	antisense
novel-m0760-3p	novel_circ_000480	1270	1291	-26.8	0.8508	AAUCCUAAAUCCCAAAUCACAA	||||||||||||x|||||||||	UUAGGAUUUAGGAUUUAGUGUU	Bra012570	A03	-	23512909	23517152	4244	antisense
novel-m0760-3p	novel_circ_000480	1395	1416	-23.4	0.7382	GUUCCCAAAUCCUAAAUCCCAA	ox|||x||||||||||||x|||	UUAGGAUUUAGGAUUUAGUGUU	Bra012570	A03	-	23512909	23517152	4244	antisense
novel-m0812-3p	novel_circ_000480	1287	1307	-31.7	0.9814	UAAAUCCCAAAUCCCUAAUCC	||||||||||||||||||||x	AUUUAGGGUUUAGGGAUUAGA	Bra012570	A03	-	23512909	23517152	4244	antisense
novel-m0812-3p	novel_circ_000480	1384	1404	-21.4	0.6646	UAAAUCCCAAAUUCCAAAAUU	||||||||||||o||x||xo|	AUUUAGGGUUUAGGGAUUAGA	Bra012570	A03	-	23512909	23517152	4244	antisense
novel-m0890-5p	novel_circ_000480	1059	1079	-21.8	0.7171	ACUUGGGUUCUUAUUGAGUAU	|||||||xx||||||x|||||	UGAACCCUUGAAUAAAUCAUA	Bra012570	A03	-	23512909	23517152	4244	antisense
novel-m0946-5p	novel_circ_000480	1059	1079	-21.8	0.7171	ACUUGGGUUCUUAUUGAGUAU	|||||||xx||||||x|||||	UGAACCCUUGAAUAAAUCAUA	Bra012570	A03	-	23512909	23517152	4244	antisense
novel-m0062-5p	novel_circ_000481	1418	1438	-21.8	0.7171	ACUUGGGUUCUUAUUGAGUAU	|||||||xx||||||x|||||	UGAACCCUUGAAUAAAUCAUA	Bra012570	A03	-	23512909	23517511	4603	antisense
novel-m0071-5p	novel_circ_000481	1418	1438	-21.8	0.7171	ACUUGGGUUCUUAUUGAGUAU	|||||||xx||||||x|||||	UGAACCCUUGAAUAAAUCAUA	Bra012570	A03	-	23512909	23517511	4603	antisense
novel-m0135-3p	novel_circ_000481	1629	1649	-28.2	0.9126	AUCCUAAAUCCCAAAUCACAA	||x||||||||||||||xx||	UAUGAUUUAGGGUUUAGGAUU	Bra012570	A03	-	23512909	23517511	4603	antisense
novel-m0135-3p	novel_circ_000481	1650	1670	-28.2	0.9126	AUACUAAAUCCCAAAUCCCUA	||||||||||||||||||xx|	UAUGAUUUAGGGUUUAGGAUU	Bra012570	A03	-	23512909	23517511	4603	antisense
novel-m0135-3p	novel_circ_000481	1747	1767	-21.5	0.6958	AUCCUAAAUCCCAAAUUCCAA	||x|||||||||||||o|x||	UAUGAUUUAGGGUUUAGGAUU	Bra012570	A03	-	23512909	23517511	4603	antisense
novel-m0161-3p	novel_circ_000481	1656	1676	-23.7	0.7315	UCCCAAAUACUAAAUCCCAAA	||x|||||x||||||||||||	AGAGUUUAGGAUUUAGGGUUU	Bra012570	A03	-	23512909	23517511	4603	antisense
novel-m0161-3p	novel_circ_000481	1731	1751	-27	0.8464	UCCAAAAUUCUAAAUCACAAA	||xx||||o|||||||x||||	AGAGUUUAGGAUUUAGGGUUU	Bra012570	A03	-	23512909	23517511	4603	antisense
novel-m0161-3p	novel_circ_000481	1753	1773	-27	0.8491	UCCCAAAUCCUAAAUCCCAAA	||x||||||||||||||||||	AGAGUUUAGGAUUUAGGGUUU	Bra012570	A03	-	23512909	23517511	4603	antisense
novel-m0225-3p	novel_circ_000481	1656	1676	-23.7	0.7315	UCCCAAAUACUAAAUCCCAAA	||x|||||x||||||||||||	AGAGUUUAGGAUUUAGGGUUU	Bra012570	A03	-	23512909	23517511	4603	antisense
novel-m0225-3p	novel_circ_000481	1731	1751	-27	0.8464	UCCAAAAUUCUAAAUCACAAA	||xx||||o|||||||x||||	AGAGUUUAGGAUUUAGGGUUU	Bra012570	A03	-	23512909	23517511	4603	antisense
novel-m0225-3p	novel_circ_000481	1753	1773	-27	0.8491	UCCCAAAUCCUAAAUCCCAAA	||x||||||||||||||||||	AGAGUUUAGGAUUUAGGGUUU	Bra012570	A03	-	23512909	23517511	4603	antisense
novel-m0350-5p	novel_circ_000481	1418	1438	-31.7	0.9814	ACUUGGGUUCUUAUUGAGUAU	||||||||||||||||||||x	UGAACCCAAGAAUAACUCAUU	Bra012570	A03	-	23512909	23517511	4603	antisense
novel-m0362-5p	novel_circ_000481	1418	1438	-21.8	0.7171	ACUUGGGUUCUUAUUGAGUAU	|||||||xx||||||x|||||	UGAACCCUUGAAUAAAUCAUA	Bra012570	A03	-	23512909	23517511	4603	antisense
novel-m0370-5p	novel_circ_000481	1418	1438	-21.8	0.7171	ACUUGGGUUCUUAUUGAGUAU	|||||||xx||||||x|||||	UGAACCCUUGAAUAAAUCAUA	Bra012570	A03	-	23512909	23517511	4603	antisense
novel-m0392-3p	novel_circ_000481	1656	1676	-23.7	0.7315	UCCCAAAUACUAAAUCCCAAA	||x|||||x||||||||||||	AGAGUUUAGGAUUUAGGGUUU	Bra012570	A03	-	23512909	23517511	4603	antisense
novel-m0392-3p	novel_circ_000481	1731	1751	-27	0.8464	UCCAAAAUUCUAAAUCACAAA	||xx||||o|||||||x||||	AGAGUUUAGGAUUUAGGGUUU	Bra012570	A03	-	23512909	23517511	4603	antisense
novel-m0392-3p	novel_circ_000481	1753	1773	-27	0.8491	UCCCAAAUCCUAAAUCCCAAA	||x||||||||||||||||||	AGAGUUUAGGAUUUAGGGUUU	Bra012570	A03	-	23512909	23517511	4603	antisense
novel-m0399-3p	novel_circ_000481	1646	1666	-31.7	0.9814	UAAAUCCCAAAUCCCUAAUCC	||||||||||||||||||||x	AUUUAGGGUUUAGGGAUUAGA	Bra012570	A03	-	23512909	23517511	4603	antisense
novel-m0399-3p	novel_circ_000481	1743	1763	-21.4	0.6646	UAAAUCCCAAAUUCCAAAAUU	||||||||||||o||x||xo|	AUUUAGGGUUUAGGGAUUAGA	Bra012570	A03	-	23512909	23517511	4603	antisense
novel-m0420-5p	novel_circ_000481	1418	1438	-21.8	0.7171	ACUUGGGUUCUUAUUGAGUAU	|||||||xx||||||x|||||	UGAACCCUUGAAUAAAUCAUA	Bra012570	A03	-	23512909	23517511	4603	antisense
novel-m0483-5p	novel_circ_000481	1418	1438	-21.8	0.7171	ACUUGGGUUCUUAUUGAGUAU	|||||||xx||||||x|||||	UGAACCCUUGAAUAAAUCAUA	Bra012570	A03	-	23512909	23517511	4603	antisense
novel-m0583-5p	novel_circ_000481	1418	1438	-21.8	0.7171	ACUUGGGUUCUUAUUGAGUAU	|||||||xx||||||x|||||	UGAACCCUUGAAUAAAUCAUA	Bra012570	A03	-	23512909	23517511	4603	antisense
novel-m0611-5p	novel_circ_000481	1656	1676	-23.7	0.7315	UCCCAAAUACUAAAUCCCAAA	||x|||||x||||||||||||	AGAGUUUAGGAUUUAGGGUUU	Bra012570	A03	-	23512909	23517511	4603	antisense
novel-m0611-5p	novel_circ_000481	1731	1751	-27	0.8464	UCCAAAAUUCUAAAUCACAAA	||xx||||o|||||||x||||	AGAGUUUAGGAUUUAGGGUUU	Bra012570	A03	-	23512909	23517511	4603	antisense
novel-m0611-5p	novel_circ_000481	1753	1773	-27	0.8491	UCCCAAAUCCUAAAUCCCAAA	||x||||||||||||||||||	AGAGUUUAGGAUUUAGGGUUU	Bra012570	A03	-	23512909	23517511	4603	antisense
novel-m0635-5p	novel_circ_000481	1418	1438	-21.8	0.7171	ACUUGGGUUCUUAUUGAGUAU	|||||||xx||||||x|||||	UGAACCCUUGAAUAAAUCAUA	Bra012570	A03	-	23512909	23517511	4603	antisense
novel-m0676-5p	novel_circ_000481	1418	1438	-21.8	0.7171	ACUUGGGUUCUUAUUGAGUAU	|||||||xx||||||x|||||	UGAACCCUUGAAUAAAUCAUA	Bra012570	A03	-	23512909	23517511	4603	antisense
novel-m0694-5p	novel_circ_000481	1418	1438	-21.8	0.7171	ACUUGGGUUCUUAUUGAGUAU	|||||||xx||||||x|||||	UGAACCCUUGAAUAAAUCAUA	Bra012570	A03	-	23512909	23517511	4603	antisense
novel-m0760-3p	novel_circ_000481	1629	1650	-26.8	0.8508	AAUCCUAAAUCCCAAAUCACAA	||||||||||||x|||||||||	UUAGGAUUUAGGAUUUAGUGUU	Bra012570	A03	-	23512909	23517511	4603	antisense
novel-m0760-3p	novel_circ_000481	1754	1775	-23.4	0.7382	GUUCCCAAAUCCUAAAUCCCAA	ox|||x||||||||||||x|||	UUAGGAUUUAGGAUUUAGUGUU	Bra012570	A03	-	23512909	23517511	4603	antisense
novel-m0812-3p	novel_circ_000481	1646	1666	-31.7	0.9814	UAAAUCCCAAAUCCCUAAUCC	||||||||||||||||||||x	AUUUAGGGUUUAGGGAUUAGA	Bra012570	A03	-	23512909	23517511	4603	antisense
novel-m0812-3p	novel_circ_000481	1743	1763	-21.4	0.6646	UAAAUCCCAAAUUCCAAAAUU	||||||||||||o||x||xo|	AUUUAGGGUUUAGGGAUUAGA	Bra012570	A03	-	23512909	23517511	4603	antisense
novel-m0890-5p	novel_circ_000481	1418	1438	-21.8	0.7171	ACUUGGGUUCUUAUUGAGUAU	|||||||xx||||||x|||||	UGAACCCUUGAAUAAAUCAUA	Bra012570	A03	-	23512909	23517511	4603	antisense
novel-m0946-5p	novel_circ_000481	1418	1438	-21.8	0.7171	ACUUGGGUUCUUAUUGAGUAU	|||||||xx||||||x|||||	UGAACCCUUGAAUAAAUCAUA	Bra012570	A03	-	23512909	23517511	4603	antisense
miR2275-x	novel_circ_000483	12483	12500	-17.7	0.6344	AAGCCUUCUUUUCAUUUA	x|||||o||||||x||x|	AUCGGAGGAAAAGAAACU	Bra019410	A03	-	24353851	24376707	22615	exon_intron
miR3699-y	novel_circ_000483	22398	22415	-20	0.7407	AAUUGUUUUCUUUUUCAG	||o|||o||||||o|||o	UUGACAGAAGAAAGAGUU	Bra019410	A03	-	24353851	24376707	22615	exon_intron
miR9410-x	novel_circ_000483	14967	14987	-25.2	0.7925	GACUUAACAUUCAGCAGACCC	|||||||x|||||||||||xx	CUGAAUUAUAAGUCGUCUGUA	Bra019410	A03	-	24353851	24376707	22615	exon_intron
miR9410-x	novel_circ_000483	15357	15377	-24.1	0.7603	GAUUUUAUAUUCAGCAGACCA	||o||x|||||||||||||xx	CUGAAUUAUAAGUCGUCUGUA	Bra019410	A03	-	24353851	24376707	22615	exon_intron
novel-m0732-3p	novel_circ_000483	358	378	-23	0.7034	AAAAUAGAACACAACACUAAU	|||x|||||||||||||||x|	UUUGAUCUUGUGUUGUGAUGA	Bra019410	A03	-	24353851	24376707	22615	exon_intron
novel-m0845-5p	novel_circ_000483	17889	17909	-29.9	0.8329	UGAAGAUCUUUCAGAAGGUCU	|||||x|||||||||||||||	ACUUCGAGAAAGUCUUCCAGA	Bra019410	A03	-	24353851	24376707	22615	exon_intron
novel-m0845-5p	novel_circ_000483	17912	17932	-29.9	0.8329	UGAAGGUCCUUCAGAAGGUCU	|||||x||x||||||||||||	ACUUCGAGAAAGUCUUCCAGA	Bra019410	A03	-	24353851	24376707	22615	exon_intron
novel-m0845-5p	novel_circ_000483	17935	17955	-28.3	0.7883	UGAAGGUCCUUCAGAAGCUCU	|||||x||x||||||||x|||	ACUUCGAGAAAGUCUUCCAGA	Bra019410	A03	-	24353851	24376707	22615	exon_intron
novel-m0845-5p	novel_circ_000483	17981	18001	-27.5	0.766	UGAAGGUCCUUCAGAAGGUUU	|||||x||x||||||||||o|	ACUUCGAGAAAGUCUUCCAGA	Bra019410	A03	-	24353851	24376707	22615	exon_intron
novel-m0845-5p	novel_circ_000483	18004	18024	-25.4	0.7075	UGAAGAUCCUUCAGAAGGUCU	|||||x||x||||||||||||	ACUUCGAGAAAGUCUUCCAGA	Bra019410	A03	-	24353851	24376707	22615	exon_intron
novel-m0142-5p	novel_circ_000484	9580	9602	-33	0.8661	UGUCUCCUAUUGUAUACAAUUGC	||o||||o||||||||||||||x	ACGGAGGGUAACAUAUGUUAACA	Bra019411	A03	+	24371098	24386165	15068	exon_intron
miR2936-x	novel_circ_000485	5818	5838	-32.7	0.8114	UGCUCUCUCUCUUGUCUCCUU	x|||||||||||||||||xxo	UCGAGAGAGAGAACAGAGACG	Bra019410	A03	-	24371098	24386165	13177	exon_intron
novel-m0173-5p	novel_circ_000485	4530	4550	-22	0.7213	UUCCUAAGGUUUCGUUAACAA	|||||||||||x|o||x|||x	AAGGAUUCCAAUGUAAAUGUA	Bra019410	A03	-	24371098	24386165	13177	exon_intron
novel-m0732-3p	novel_circ_000485	1458	1478	-23.5	0.7187	AAAAUAGAACACAACACUGUU	|||x||||||||||||||oo|	UUUGAUCUUGUGUUGUGAUGA	Bra019410	A03	-	24371098	24386165	13177	exon_intron
novel-m0732-3p	novel_circ_000485	8167	8187	-23	0.7034	AAAAUAGAACACAACACUAAU	|||x|||||||||||||||x|	UUUGAUCUUGUGUUGUGAUGA	Bra019410	A03	-	24371098	24386165	13177	exon_intron
novel-m0142-5p	novel_circ_000486	5659	5681	-33	0.8661	UGUCUCCUAUUGUAUACAAUUGC	||o||||o||||||||||||||x	ACGGAGGGUAACAUAUGUUAACA	Bra019410	A03	+	24375019	24383195	8177	antisense
miR3699-y	novel_circ_000495	18955	18972	-18.8	0.6937	CACUGUCUUCUUUUACAU	x||||||||||||ox||x	UUGACAGAAGAAAGAGUU	Bra019293	A03	-	25194220	25219171	24952	antisense
miR5656-y	novel_circ_000495	18889	18906	-21.9	0.6518	CCACCUCAUCUCUGCACC	x|||x|||||||||xx||	AGUGAAGUAGAGACUGGG	Bra019293	A03	-	25194220	25219171	24952	antisense
miR7121-x	novel_circ_000495	311	328	-28.2	0.7944	GAGGAGAUCCACUUGGGC	|||||||x|||||||o|x	CUCCUCUUGGUGAACUCC	Bra019293	A03	-	25194220	25219171	24952	antisense
miR5261-y	novel_circ_000502	83179	83196	-22.5	0.6233	AACACCUACCGCAACUAA	|||||||||||x|||ox|	UUGUGGAUGGCCUUGGCU	Bra024117	A03	-	27499034	27588008	85255	exon_intron
miR5656-y	novel_circ_000502	65411	65428	-19.8	0.6018	UCAUUUCAUCUCUAACAC	|||o|||||||||x||x|	AGUGAAGUAGAGACUGGG	Bra024117	A03	-	27499034	27588008	85255	exon_intron
miR6219-y	novel_circ_000502	45732	45749	-20.3	0.6152	UAUCUGGGAUUUGGAUUU	o|||||||x||||||x|o	GUAGACCCGAAACCUUAG	Bra024117	A03	-	27499034	27588008	85255	exon_intron
miR8005-y	novel_circ_000502	45079	45102	-21	0.7292	AAAUUUUAAAUCCAAAAUCCCAAA	||||o||||||x|x|||||x||||	UUUAGAAUUUAAGAUUUAGAGUUU	Bra024117	A03	-	27499034	27588008	85255	exon_intron
miR858-x	novel_circ_000502	14409	14429	-23.1	0.6581	CAAGCAACAGACGAACUGUAA	x|||||||||||o|x|||x||	UUUCGUUGUCUGUUCGACCUU	Bra024117	A03	-	27499034	27588008	85255	exon_intron
novel-m0062-5p	novel_circ_000502	84320	84340	-19.7	0.648	AUUUAGGAACUUAUUUAGUUU	|o||x||||||||||||||x|	UGAACCCUUGAAUAAAUCAUA	Bra024117	A03	-	27499034	27588008	85255	exon_intron
novel-m0064-5p	novel_circ_000502	42384	42406	-25.9	0.7443	UUUUGUAUCUAGUAAAUCCUUGA	|x|||||o||||x|||||||||x	AUAACAUGGAUCUUUUAGGAACA	Bra024117	A03	-	27499034	27588008	85255	exon_intron
novel-m0071-5p	novel_circ_000502	84320	84340	-19.7	0.648	AUUUAGGAACUUAUUUAGUUU	|o||x||||||||||||||x|	UGAACCCUUGAAUAAAUCAUA	Bra024117	A03	-	27499034	27588008	85255	exon_intron
novel-m0135-3p	novel_circ_000502	45148	45168	-24.6	0.7987	AUCCUAUAUCCCAAACCCAAA	||x|||x||||||||x||x||	UAUGAUUUAGGGUUUAGGAUU	Bra024117	A03	-	27499034	27588008	85255	exon_intron
novel-m0135-3p	novel_circ_000502	84161	84181	-25	0.8091	AUACUAAAUCCCAAAUCACAA	|||||||||||||||||xx||	UAUGAUUUAGGGUUUAGGAUU	Bra024117	A03	-	27499034	27588008	85255	exon_intron
novel-m0161-3p	novel_circ_000502	45154	45174	-24.4	0.7508	UCCCAAAUCCUAUAUCCCAAA	||x|||||||||x||||||||	AGAGUUUAGGAUUUAGGGUUU	Bra024117	A03	-	27499034	27588008	85255	exon_intron
novel-m0161-3p	novel_circ_000502	84167	84187	-21.9	0.6759	UCUCUAAUACUAAAUCCCAAA	||||x|||x||||||||||||	AGAGUUUAGGAUUUAGGGUUU	Bra024117	A03	-	27499034	27588008	85255	exon_intron
novel-m0161-3p	novel_circ_000502	84188	84208	-21.9	0.6759	UCCCAAAGUCUAAAUCCCAAA	||x||||xo||||||||||||	AGAGUUUAGGAUUUAGGGUUU	Bra024117	A03	-	27499034	27588008	85255	exon_intron
novel-m0225-3p	novel_circ_000502	45154	45174	-24.4	0.7508	UCCCAAAUCCUAUAUCCCAAA	||x|||||||||x||||||||	AGAGUUUAGGAUUUAGGGUUU	Bra024117	A03	-	27499034	27588008	85255	exon_intron
novel-m0225-3p	novel_circ_000502	84167	84187	-21.9	0.6759	UCUCUAAUACUAAAUCCCAAA	||||x|||x||||||||||||	AGAGUUUAGGAUUUAGGGUUU	Bra024117	A03	-	27499034	27588008	85255	exon_intron
novel-m0225-3p	novel_circ_000502	84188	84208	-21.9	0.6759	UCCCAAAGUCUAAAUCCCAAA	||x||||xo||||||||||||	AGAGUUUAGGAUUUAGGGUUU	Bra024117	A03	-	27499034	27588008	85255	exon_intron
novel-m0240-3p	novel_circ_000502	14202	14222	-20.7	0.6765	AAUUCCUAUUGUAACUGAAAU	|||o||o||||||x||o||||	UUAGGGGUAACAUAGAUUUUA	Bra024117	A03	-	27499034	27588008	85255	exon_intron
novel-m0300-5p	novel_circ_000502	77519	77539	-27.9	0.6503	UAUCCUACCGAGUCUACUAUG	||||||x|||||x|o||||o|	AUAGGACGGCUCUGGUGAUGC	Bra024117	A03	-	27499034	27588008	85255	exon_intron
novel-m0332-5p	novel_circ_000502	45546	45566	-23.9	0.6408	AUUUAGGUUCAAGAUCUGGGA	||||x||||||xo||||||||	UAAACCCAAGUCUUAGACCCU	Bra024117	A03	-	27499034	27588008	85255	exon_intron
novel-m0362-5p	novel_circ_000502	84320	84340	-19.7	0.648	AUUUAGGAACUUAUUUAGUUU	|o||x||||||||||||||x|	UGAACCCUUGAAUAAAUCAUA	Bra024117	A03	-	27499034	27588008	85255	exon_intron
novel-m0370-5p	novel_circ_000502	84320	84340	-19.7	0.648	AUUUAGGAACUUAUUUAGUUU	|o||x||||||||||||||x|	UGAACCCUUGAAUAAAUCAUA	Bra024117	A03	-	27499034	27588008	85255	exon_intron
novel-m0392-3p	novel_circ_000502	45154	45174	-24.4	0.7508	UCCCAAAUCCUAUAUCCCAAA	||x|||||||||x||||||||	AGAGUUUAGGAUUUAGGGUUU	Bra024117	A03	-	27499034	27588008	85255	exon_intron
novel-m0392-3p	novel_circ_000502	84167	84187	-21.9	0.6759	UCUCUAAUACUAAAUCCCAAA	||||x|||x||||||||||||	AGAGUUUAGGAUUUAGGGUUU	Bra024117	A03	-	27499034	27588008	85255	exon_intron
novel-m0392-3p	novel_circ_000502	84188	84208	-21.9	0.6759	UCCCAAAGUCUAAAUCCCAAA	||x||||xo||||||||||||	AGAGUUUAGGAUUUAGGGUUU	Bra024117	A03	-	27499034	27588008	85255	exon_intron
novel-m0399-3p	novel_circ_000502	45076	45096	-21.6	0.6667	UAAAUCCAAAAUCCCAAAGCG	|||||||x|||||||x||x|x	AUUUAGGGUUUAGGGAUUAGA	Bra024117	A03	-	27499034	27588008	85255	exon_intron
novel-m0399-3p	novel_circ_000502	84157	84177	-25.6	0.7901	UAAAUCCCAAAUCACAAAACG	|||||||||||||x|x||x|x	AUUUAGGGUUUAGGGAUUAGA	Bra024117	A03	-	27499034	27588008	85255	exon_intron
novel-m0399-3p	novel_circ_000502	84178	84198	-25.6	0.7926	UAAAUCCCAAAUCUCUAAUAC	|||||||||||||o|||||xx	AUUUAGGGUUUAGGGAUUAGA	Bra024117	A03	-	27499034	27588008	85255	exon_intron
novel-m0405-3p	novel_circ_000502	14202	14222	-20.7	0.6765	AAUUCCUAUUGUAACUGAAAU	|||o||o||||||x||o||||	UUAGGGGUAACAUAGAUUUUA	Bra024117	A03	-	27499034	27588008	85255	exon_intron
novel-m0417-5p	novel_circ_000502	22853	22872	-22.3	0.6904	CUCUUUACCUCAGUACCUUU	||||||||||||x|||x|x|	GAGAAAUGGAGUAAUGAACA	Bra024117	A03	-	27499034	27588008	85255	exon_intron
novel-m0420-5p	novel_circ_000502	84320	84340	-19.7	0.648	AUUUAGGAACUUAUUUAGUUU	|o||x||||||||||||||x|	UGAACCCUUGAAUAAAUCAUA	Bra024117	A03	-	27499034	27588008	85255	exon_intron
novel-m0483-5p	novel_circ_000502	84320	84340	-19.7	0.648	AUUUAGGAACUUAUUUAGUUU	|o||x||||||||||||||x|	UGAACCCUUGAAUAAAUCAUA	Bra024117	A03	-	27499034	27588008	85255	exon_intron
novel-m0583-5p	novel_circ_000502	84320	84340	-19.7	0.648	AUUUAGGAACUUAUUUAGUUU	|o||x||||||||||||||x|	UGAACCCUUGAAUAAAUCAUA	Bra024117	A03	-	27499034	27588008	85255	exon_intron
novel-m0611-5p	novel_circ_000502	45154	45174	-24.4	0.7508	UCCCAAAUCCUAUAUCCCAAA	||x|||||||||x||||||||	AGAGUUUAGGAUUUAGGGUUU	Bra024117	A03	-	27499034	27588008	85255	exon_intron
novel-m0611-5p	novel_circ_000502	84167	84187	-21.9	0.6759	UCUCUAAUACUAAAUCCCAAA	||||x|||x||||||||||||	AGAGUUUAGGAUUUAGGGUUU	Bra024117	A03	-	27499034	27588008	85255	exon_intron
novel-m0611-5p	novel_circ_000502	84188	84208	-21.9	0.6759	UCCCAAAGUCUAAAUCCCAAA	||x||||xo||||||||||||	AGAGUUUAGGAUUUAGGGUUU	Bra024117	A03	-	27499034	27588008	85255	exon_intron
novel-m0632-3p	novel_circ_000502	42384	42406	-25.9	0.7443	UUUUGUAUCUAGUAAAUCCUUGA	|x|||||o||||x|||||||||x	AUAACAUGGAUCUUUUAGGAACA	Bra024117	A03	-	27499034	27588008	85255	exon_intron
novel-m0633-3p	novel_circ_000502	42384	42406	-25.9	0.7443	UUUUGUAUCUAGUAAAUCCUUGA	|x|||||o||||x|||||||||x	AUAACAUGGAUCUUUUAGGAACA	Bra024117	A03	-	27499034	27588008	85255	exon_intron
novel-m0635-5p	novel_circ_000502	84320	84340	-19.7	0.648	AUUUAGGAACUUAUUUAGUUU	|o||x||||||||||||||x|	UGAACCCUUGAAUAAAUCAUA	Bra024117	A03	-	27499034	27588008	85255	exon_intron
novel-m0676-5p	novel_circ_000502	84320	84340	-19.7	0.648	AUUUAGGAACUUAUUUAGUUU	|o||x||||||||||||||x|	UGAACCCUUGAAUAAAUCAUA	Bra024117	A03	-	27499034	27588008	85255	exon_intron
novel-m0686-5p	novel_circ_000502	45546	45566	-23.9	0.6408	AUUUAGGUUCAAGAUCUGGGA	||||x||||||xo||||||||	UAAACCCAAGUCUUAGACCCU	Bra024117	A03	-	27499034	27588008	85255	exon_intron
novel-m0694-5p	novel_circ_000502	84320	84340	-19.7	0.648	AUUUAGGAACUUAUUUAGUUU	|o||x||||||||||||||x|	UGAACCCUUGAAUAAAUCAUA	Bra024117	A03	-	27499034	27588008	85255	exon_intron
novel-m0729-5p	novel_circ_000502	45546	45566	-23.9	0.6408	AUUUAGGUUCAAGAUCUGGGA	||||x||||||xo||||||||	UAAACCCAAGUCUUAGACCCU	Bra024117	A03	-	27499034	27588008	85255	exon_intron
novel-m0750-5p	novel_circ_000502	22853	22872	-22.3	0.6904	CUCUUUACCUCAGUACCUUU	||||||||||||x|||x|x|	GAGAAAUGGAGUAAUGAACA	Bra024117	A03	-	27499034	27588008	85255	exon_intron
novel-m0754-5p	novel_circ_000502	84338	84358	-30.3	0.7809	UUUGGGAACCCAUUUGGCAUU	|||||||||||||||||x|o|	AAACCCUUGGGUAAACCCUGA	Bra024117	A03	-	27499034	27588008	85255	exon_intron
novel-m0760-3p	novel_circ_000502	84161	84182	-20.5	0.6508	AAUACUAAAUCCCAAAUCACAA	|||x||||||||x|||||||||	UUAGGAUUUAGGAUUUAGUGUU	Bra024117	A03	-	27499034	27588008	85255	exon_intron
novel-m0810-5p	novel_circ_000502	45546	45566	-23.9	0.6408	AUUUAGGUUCAAGAUCUGGGA	||||x||||||xo||||||||	UAAACCCAAGUCUUAGACCCU	Bra024117	A03	-	27499034	27588008	85255	exon_intron
novel-m0812-3p	novel_circ_000502	45076	45096	-21.6	0.6667	UAAAUCCAAAAUCCCAAAGCG	|||||||x|||||||x||x|x	AUUUAGGGUUUAGGGAUUAGA	Bra024117	A03	-	27499034	27588008	85255	exon_intron
novel-m0812-3p	novel_circ_000502	84157	84177	-25.6	0.7901	UAAAUCCCAAAUCACAAAACG	|||||||||||||x|x||x|x	AUUUAGGGUUUAGGGAUUAGA	Bra024117	A03	-	27499034	27588008	85255	exon_intron
novel-m0812-3p	novel_circ_000502	84178	84198	-25.6	0.7926	UAAAUCCCAAAUCUCUAAUAC	|||||||||||||o|||||xx	AUUUAGGGUUUAGGGAUUAGA	Bra024117	A03	-	27499034	27588008	85255	exon_intron
novel-m0868-5p	novel_circ_000502	22853	22872	-22.3	0.6904	CUCUUUACCUCAGUACCUUU	||||||||||||x|||x|x|	GAGAAAUGGAGUAAUGAACA	Bra024117	A03	-	27499034	27588008	85255	exon_intron
novel-m0890-5p	novel_circ_000502	84320	84340	-19.7	0.648	AUUUAGGAACUUAUUUAGUUU	|o||x||||||||||||||x|	UGAACCCUUGAAUAAAUCAUA	Bra024117	A03	-	27499034	27588008	85255	exon_intron
novel-m0946-5p	novel_circ_000502	84320	84340	-19.7	0.648	AUUUAGGAACUUAUUUAGUUU	|o||x||||||||||||||x|	UGAACCCUUGAAUAAAUCAUA	Bra024117	A03	-	27499034	27588008	85255	exon_intron
miR477-x	novel_circ_000513	222	241	-34.4	0.8452	UGAGGGGGGGUACCGAAGGA	||||o|||o||x|||||||x	ACUCUCCCUCAAGGCUUCCA	Bra017684	A03	+	29806583	29806834	252	antisense
miR5054-y	novel_circ_000514	73	90	-30.3	0.7337	AGGGGUGCUAGCGGCGGC	|||||||xo|||x||||x	UCCCCACAGUCGGCGCCA	Bra017734	A03	-	30159870	30160063	194	antisense
miR3699-y	novel_circ_000518	1789	1806	-17.4	0.6421	AAUUGUCUUCUAUCUACA	||o||||||||x|||xx|	UUGACAGAAGAAAGAGUU	Bra017773	A03	-	30405913	30410454	4542	exon_intron
miR11470-x	novel_circ_000526	2510	2528	-19.1	0.6388	AAAACCUUACUUUUAACUA	x||||||x|||oo||||||	CUUUGGAUUGAGGAUUGAU	Bra014399	A04	-	318696	321801	3005	exon_intron
novel-m0408-5p	novel_circ_000526	1082	1101	-22.3	0.6282	ACCAACCCAAGAACGUUCAG	|||||x||x|||||x|||||	UGGUUUGGAUCUUGGAAGUC	Bra014399	A04	-	318696	321801	3005	exon_intron
miR5149-y	novel_circ_000533	4115	4132	-20.5	0.6613	CUCGUCACUUCUAGCACC	||||x||||||||oxx||	GAGCUGUGAAGAUUUAGG	Bra014638	A04	-	1952257	1962980	10724	antisense
novel-m0135-3p	novel_circ_000533	5902	5922	-20.1	0.6547	AUACCAAAUCCCAAAUCAUAA	||||x||||||||||||x|||	UAUGAUUUAGGGUUUAGGAUU	Bra014638	A04	-	1952257	1962980	10724	antisense
novel-m0135-3p	novel_circ_000533	6237	6257	-19.2	0.6254	UUACCAAAUCCCAAAUUAUAA	x|||x|||||||||||ox|||	UAUGAUUUAGGGUUUAGGAUU	Bra014638	A04	-	1952257	1962980	10724	antisense
novel-m0135-3p	novel_circ_000533	6408	6428	-19.2	0.6254	UUACCAAAUCCCAAAUUAUAA	x|||x|||||||||||ox|||	UAUGAUUUAGGGUUUAGGAUU	Bra014638	A04	-	1952257	1962980	10724	antisense
novel-m0399-3p	novel_circ_000533	5898	5918	-19.9	0.6161	CAAAUCCCAAAUCAUAAAUCU	x||||||||||||xox|||||	AUUUAGGGUUUAGGGAUUAGA	Bra014638	A04	-	1952257	1962980	10724	antisense
novel-m0760-3p	novel_circ_000533	6258	6279	-21.7	0.6911	AAACCCAAAUCCUAAAUCACUU	||x||x||||||||||||||xx	UUAGGAUUUAGGAUUUAGUGUU	Bra014638	A04	-	1952257	1962980	10724	antisense
novel-m0760-3p	novel_circ_000533	6429	6450	-21.7	0.6911	AAACCCAAAUCCUAAAUCACUU	||x||x||||||||||||||xx	UUAGGAUUUAGGAUUUAGUGUU	Bra014638	A04	-	1952257	1962980	10724	antisense
novel-m0812-3p	novel_circ_000533	5898	5918	-19.9	0.6161	CAAAUCCCAAAUCAUAAAUCU	x||||||||||||xox|||||	AUUUAGGGUUUAGGGAUUAGA	Bra014638	A04	-	1952257	1962980	10724	antisense
novel-m0158-3p	novel_circ_000535	9788	9810	-23.4	0.6429	AACGCGCCUUACUUAUAAUAUAU	|||||||xo|||||x||||||||	UUGCGCGAGAUGAACAUUAUAUA	Bra014652	A04	+	2037098	2054141	15035	exon_intron
novel-m0460-3p	novel_circ_000535	9052	9074	-36.2	0.9784	UCUUACUAACACCACUACUGUAC	||||||||||||||||||||||x	AGAAUGAUUGUGGUGAUGACAUA	Bra014652	A04	+	2037098	2054141	15035	exon_intron
novel-m0584-5p	novel_circ_000535	9788	9810	-33.7	0.9208	AACGCGCCUUACUUAUAAUAUAU	||||||||o||||||||||||||	UUGCGCGGGAUGAAUAUUAUAUA	Bra014652	A04	+	2037098	2054141	15035	exon_intron
novel-m0693-3p	novel_circ_000535	9788	9810	-33.7	0.9208	AACGCGCCUUACUUAUAAUAUAU	||||||||o||||||||||||||	UUGCGCGGGAUGAAUAUUAUAUA	Bra014652	A04	+	2037098	2054141	15035	exon_intron
novel-m0738-3p	novel_circ_000535	9788	9810	-24.5	0.7081	AACGCGCCUUACUUAUAAUAUAU	||||x|||||||||x||||||||	UUGCACGGAAUGAACAUUAUAUA	Bra014652	A04	+	2037098	2054141	15035	exon_intron
miR1117-x	novel_circ_000537	14703	14720	-26.9	0.6862	AGGGCCGAGCACCUUUAU	||||||o||||||x|xx|	UCCCGGUUCGUGGCACCA	Bra014686	A04	-	2234482	2263790	29309	antisense
miR5021-x	novel_circ_000537	9969	9986	-18.8	0.6225	UCCUUCUCCUUCUUCUUU	ox|||||x|||||||||x	GAGAAGACGAAGAAGAAC	Bra014686	A04	-	2234482	2263790	29309	antisense
miR5021-x	novel_circ_000537	16492	16509	-21	0.6954	UCCUUCUCCUUCUUCUUG	ox|||||x||||||||||	GAGAAGACGAAGAAGAAC	Bra014686	A04	-	2234482	2263790	29309	antisense
novel-m0510-3p	novel_circ_000537	7386	7407	-23.4	0.7222	UAUACAAAUCUACCUGGUUGUU	||||x|||||||||||o|||xx	AUAUAUUUAGAUGGACUAACCU	Bra014686	A04	-	2234482	2263790	29309	antisense
novel-m0713-5p	novel_circ_000537	21525	21547	-39.8	0.9925	UAGGUACACUUGCUGCUUUCUGC	||||||||||||||||||||||x	AUCCAUGUGAACGACGAAAGACA	Bra014686	A04	-	2234482	2263790	29309	antisense
novel-m0727-5p	novel_circ_000537	11216	11236	-23.5	0.6772	AAAUGUCUCAGUUCAACUCAG	|||||||||||x|xx||||||	UUUACAGAGUCUACAUGAGUC	Bra014686	A04	-	2234482	2263790	29309	antisense
miR477-y	novel_circ_000539	7552	7573	-31.8	0.6477	ACUCCUGAAACUCCCUCCCACU	|||||x|||||o|||||x|||o	UGAGGCCUUUGGGGGAGAGUGG	Bra014744	A04	-	2749182	2759184	8970	exon_intron
miR5072-x	novel_circ_000539	177	194	-23.4	0.6174	AGUGGUCACUUCCGUGGA	||x|||||||||x|o||x	UCCCCAGUGAAGUCGCCA	Bra014744	A04	-	2749182	2759184	8970	exon_intron
miR1117-x	novel_circ_000540	411	428	-28.2	0.7194	CGGGUCAAGCACCUAGGU	x|||o||||||||xx|||	UCCCGGUUCGUGGCACCA	Bra014754	A04	-	2829149	2834432	5284	exon_intron
miR5021-x	novel_circ_000542	3311	3328	-19.9	0.6656	CUCUCCUUCUUCUUCUUG	||||x||x||||||||||	GAGAAGACGAAGAAGAAC	Bra039783	A04	+	3917687	3927127	9047	exon_intron
novel-m0869-5p	novel_circ_000542	719	741	-21.8	0.6246	AGCCUGGAAAAGUAAUUAAUUAU	|o|||||x|||||||||x|||||	UUGGACCCUUUCAUUAACUAAUA	Bra039783	A04	+	3917687	3927127	9047	exon_intron
miR5293-x	novel_circ_000560	227	246	-23.9	0.679	UUCUUGUUGUUCUUUCUUCU	|||||xoo||||o|||||||	AAGAAGGGCAAGGAAGAAGA	Bra025450	A04	-	9033891	9034329	439	antisense
miR5293-x	novel_circ_000561	375	394	-23.9	0.679	UUCUUGUUGUUCUUUCUUCU	|||||xoo||||o|||||||	AAGAAGGGCAAGGAAGAAGA	Bra025450	A04	-	9034069	9034477	409	antisense
novel-m0036-3p	novel_circ_000564	7063	7083	-38.7	1	ACUCUAUACCUCAACCCAACC	|||||||||||||||||||||	UGAGAUAUGGAGUUGGGUUGG	Bra032141	A04	+	10990604	11017670	27067	antisense
novel-m0198-5p	novel_circ_000564	7472	7494	-29.6	0.7014	ACUCUCAAUUGCACUCACGCUAU	||||||||||||||||xx|||x|	UGAGAGUUAACGUGAGCACGACA	Bra032141	A04	+	10990604	11017670	27067	antisense
novel-m0727-5p	novel_circ_000564	25409	25429	-30.1	0.8674	AAAUGUCUCAGUUGUACUCAG	|||||||||||x|||||||||	UUUACAGAGUCUACAUGAGUC	Bra032141	A04	+	10990604	11017670	27067	antisense
miR5021-x	novel_circ_000576	6904	6921	-21	0.6818	UCCUUUUGCUUCUUCUUC	ox|||o|||||||||||x	GAGAAGACGAAGAAGAAC	Bra021646	A04	+	13724309	13740017	15709	exon_intron
miR5656-y	novel_circ_000576	3183	3200	-24.6	0.73	CCACUACGUCUCUGAGCC	x||||x|o|||||||x||	AGUGAAGUAGAGACUGGG	Bra021646	A04	+	13724309	13740017	15709	exon_intron
novel-m0158-3p	novel_circ_000576	11737	11759	-31.3	0.8599	AGCGCGCCCUACUUGUAAUAUAU	|o|||||x|||||||||||||||	UUGCGCGAGAUGAACAUUAUAUA	Bra021646	A04	+	13724309	13740017	15709	exon_intron
novel-m0460-3p	novel_circ_000576	10921	10943	-36.2	0.9784	UCUUACUAACACCACUACUGUAC	||||||||||||||||||||||x	AGAAUGAUUGUGGUGAUGACAUA	Bra021646	A04	+	13724309	13740017	15709	exon_intron
novel-m0584-5p	novel_circ_000576	11737	11759	-36.3	0.9918	AGCGCGCCCUACUUGUAAUAUAU	|o||||||||||||o||||||||	UUGCGCGGGAUGAAUAUUAUAUA	Bra021646	A04	+	13724309	13740017	15709	exon_intron
novel-m0693-3p	novel_circ_000576	11737	11759	-36.3	0.9918	AGCGCGCCCUACUUGUAAUAUAU	|o||||||||||||o||||||||	UUGCGCGGGAUGAAUAUUAUAUA	Bra021646	A04	+	13724309	13740017	15709	exon_intron
novel-m0738-3p	novel_circ_000576	11737	11759	-25.9	0.7486	AGCGCGCCCUACUUGUAAUAUAU	|o||x|||x||||||||||||||	UUGCACGGAAUGAACAUUAUAUA	Bra021646	A04	+	13724309	13740017	15709	exon_intron
miR1134-y	novel_circ_000584	98	116	-25.4	0.8581	UCUGUGUUCUUCUUCUUCA	|xo|||||||||||||||x	AAGCACAAGAAGAAGAAGA	Bra021924	A04	-	15304218	15304403	186	antisense
novel-m0161-3p	novel_circ_000611	756	776	-21.5	0.6615	UUUCAAAUACUAAAUCACAAA	|o||||||x|||||||x||||	AGAGUUUAGGAUUUAGGGUUU	Bra004645	A05	+	1200419	1202306	1888	exon_intron
novel-m0161-3p	novel_circ_000611	878	898	-22.4	0.6892	UGAUAAAUCCUAAAUCUCAAA	|xxo||||||||||||o||||	AGAGUUUAGGAUUUAGGGUUU	Bra004645	A05	+	1200419	1202306	1888	exon_intron
novel-m0225-3p	novel_circ_000611	756	776	-21.5	0.6615	UUUCAAAUACUAAAUCACAAA	|o||||||x|||||||x||||	AGAGUUUAGGAUUUAGGGUUU	Bra004645	A05	+	1200419	1202306	1888	exon_intron
novel-m0225-3p	novel_circ_000611	878	898	-22.4	0.6892	UGAUAAAUCCUAAAUCUCAAA	|xxo||||||||||||o||||	AGAGUUUAGGAUUUAGGGUUU	Bra004645	A05	+	1200419	1202306	1888	exon_intron
novel-m0350-5p	novel_circ_000611	559	579	-26.1	0.808	ACUUGGGUUCUUUUUGAGAUA	||||||||||||x|||||xx|	UGAACCCAAGAAUAACUCAUU	Bra004645	A05	+	1200419	1202306	1888	exon_intron
novel-m0392-3p	novel_circ_000611	756	776	-21.5	0.6615	UUUCAAAUACUAAAUCACAAA	|o||||||x|||||||x||||	AGAGUUUAGGAUUUAGGGUUU	Bra004645	A05	+	1200419	1202306	1888	exon_intron
novel-m0392-3p	novel_circ_000611	878	898	-22.4	0.6892	UGAUAAAUCCUAAAUCUCAAA	|xxo||||||||||||o||||	AGAGUUUAGGAUUUAGGGUUU	Bra004645	A05	+	1200419	1202306	1888	exon_intron
novel-m0611-5p	novel_circ_000611	756	776	-21.5	0.6615	UUUCAAAUACUAAAUCACAAA	|o||||||x|||||||x||||	AGAGUUUAGGAUUUAGGGUUU	Bra004645	A05	+	1200419	1202306	1888	exon_intron
novel-m0611-5p	novel_circ_000611	878	898	-22.4	0.6892	UGAUAAAUCCUAAAUCUCAAA	|xxo||||||||||||o||||	AGAGUUUAGGAUUUAGGGUUU	Bra004645	A05	+	1200419	1202306	1888	exon_intron
novel-m0760-3p	novel_circ_000611	879	900	-20	0.6309	AAUGAUAAAUCCUAAAUCUCAA	|||xx|||||||||||||x|||	UUAGGAUUUAGGAUUUAGUGUU	Bra004645	A05	+	1200419	1202306	1888	exon_intron
miR10516-x	novel_circ_000614	7043	7061	-22	0.6044	UAGGAGACGUCUCCACACU	||||||||||||x|xx|||	AUCCUCUGCAGACGACUGA	Bra004748	A05	-	1630073	1681930	49137	exon_intron
miR5072-x	novel_circ_000614	27809	27826	-26.1	0.6887	GGAGGUCACUUUAGAGGU	o|x||||||||o||x|||	UCCCCAGUGAAGUCGCCA	Bra004748	A05	-	1630073	1681930	49137	exon_intron
miR5072-x	novel_circ_000614	27857	27874	-27.3	0.7203	GGAGGUCACUUUAGGGGU	o|x||||||||o||x|||	UCCCCAGUGAAGUCGCCA	Bra004748	A05	-	1630073	1681930	49137	exon_intron
miR5072-x	novel_circ_000614	28097	28114	-33.8	0.8918	GGAGGUCACUUCAGCGGA	o|x||||||||||||||x	UCCCCAGUGAAGUCGCCA	Bra004748	A05	-	1630073	1681930	49137	exon_intron
miR5072-x	novel_circ_000614	28337	28354	-28.2	0.7441	GGUGGUCACUUUAGGGGU	o|x||||||||o||x|||	UCCCCAGUGAAGUCGCCA	Bra004748	A05	-	1630073	1681930	49137	exon_intron
miR5072-x	novel_circ_000614	28529	28546	-28.1	0.7414	GGAGGUCACUUCAGAGGA	o|x|||||||||||x||x	UCCCCAGUGAAGUCGCCA	Bra004748	A05	-	1630073	1681930	49137	exon_intron
miR5072-x	novel_circ_000614	30216	30233	-29.9	0.7889	GGAGGUCACUUUAGUGGU	o|x||||||||o||o|||	UCCCCAGUGAAGUCGCCA	Bra004748	A05	-	1630073	1681930	49137	exon_intron
miR5072-x	novel_circ_000614	30974	30991	-28.1	0.7414	GGAGGUCACUUCAGAGGA	o|x|||||||||||x||x	UCCCCAGUGAAGUCGCCA	Bra004748	A05	-	1630073	1681930	49137	exon_intron
miR5072-x	novel_circ_000615	125	142	-29.9	0.7889	GGAGGUCACUUUAGUGGU	o|x||||||||o||o|||	UCCCCAGUGAAGUCGCCA	Bra004749	A05	-	1651627	1651839	213	antisense
miR1134-y	novel_circ_000644	4661	4679	-18.4	0.6216	UCCGGGUUCUUCUUCUAGU	|x||x|||||||||||xx|	AAGCACAAGAAGAAGAAGA	NA	A05	+	4604500	4609925	5426	intergenic
miR5021-x	novel_circ_000644	99	116	-21.3	0.7124	CUCUUCUUCUUCUUCUAC	|||||||x||||||||xx	GAGAAGACGAAGAAGAAC	NA	A05	+	4604500	4609925	5426	intergenic
miR5293-x	novel_circ_000647	1596	1615	-21.8	0.6089	UCCUUCCCUUUCCUUCAUCC	|x||||||x|||||||x||x	AAGAAGGGCAAGGAAGAAGA	Bra005457	A05	-	5586794	5592063	5270	antisense
novel-m0553-3p	novel_circ_000659	9246	9266	-28.5	0.7403	GUUGAGCUCUAGGUAGAAAAA	x|o||||||||||||||xx||	AAGCUCGAGAUCCAUCUGGUU	Bra018403	A05	+	7992435	8001935	9501	exon_intron
novel-m0605-3p	novel_circ_000659	9246	9266	-28.5	0.7403	GUUGAGCUCUAGGUAGAAAAA	x|o||||||||||||||xx||	AAGCUCGAGAUCCAUCUGGUU	Bra018403	A05	+	7992435	8001935	9501	exon_intron
miR5021-x	novel_circ_000662	998	1015	-18.6	0.6221	UCCUUCUUCUUCUUCUUA	ox|||||x|||||||||x	GAGAAGACGAAGAAGAAC	Bra037098	A05	+	9406441	9409351	2911	antisense
miR5021-x	novel_circ_000665	95	112	-19	0.6355	UUCUUCUUCUUCUCCUUU	o||||||x|||||x|||x	GAGAAGACGAAGAAGAAC	Bra021323	A05	+	9567853	9568018	166	antisense
miR1863-y	novel_circ_000668	31	54	-31.7	0.7847	GACCGAGAUUAUGGUACAAUCUCA	x|x|||||o|||||||||||||x|	AUCGCUCUGAUACCAUGUUAGAUU	NA	A05	+	10069392	10074529	5138	intergenic
miR3511-x	novel_circ_000669	2114	2131	-22.2	0.7735	GUCCGUUACUUACUUCUU	x||||x||||||||||||	AAGGCCAUGAAUGAAGAA	NA	A05	-	10069392	10074529	5138	intergenic
novel-m0135-3p	novel_circ_000681	158	178	-20	0.6472	AUUCCAAAUCCCAAAUCCCAA	||x|x|||||||||||||x||	UAUGAUUUAGGGUUUAGGAUU	NA	A05	+	16266240	16267457	1218	intergenic
novel-m0135-3p	novel_circ_000681	309	329	-18.7	0.6052	UUACCAAAUCCCAAAUCAUAA	x|||x||||||||||||x|||	UAUGAUUUAGGGUUUAGGAUU	NA	A05	+	16266240	16267457	1218	intergenic
novel-m0135-3p	novel_circ_000681	459	479	-21.1	0.6828	AUCCCAAAUCCCAAAUCAUAA	||x|x||||||||||||x|||	UAUGAUUUAGGGUUUAGGAUU	NA	A05	+	16266240	16267457	1218	intergenic
novel-m0399-3p	novel_circ_000681	161	181	-23.7	0.736	CAAAUUCCAAAUCCCAAAUCC	x||||o|||||||||x||||x	AUUUAGGGUUUAGGGAUUAGA	NA	A05	+	16266240	16267457	1218	intergenic
novel-m0399-3p	novel_circ_000681	462	482	-25.3	0.769	CUAAUCCCAAAUCCCAAAUCA	xx|||||||||||||x||||x	AUUUAGGGUUUAGGGAUUAGA	NA	A05	+	16266240	16267457	1218	intergenic
novel-m0760-3p	novel_circ_000681	452	473	-20.2	0.6372	AAUCCCAAAUCAUAAAUCCCCA	|||||x|||||x||||||x|x|	UUAGGAUUUAGGAUUUAGUGUU	NA	A05	+	16266240	16267457	1218	intergenic
novel-m0812-3p	novel_circ_000681	161	181	-23.7	0.736	CAAAUUCCAAAUCCCAAAUCC	x||||o|||||||||x||||x	AUUUAGGGUUUAGGGAUUAGA	NA	A05	+	16266240	16267457	1218	intergenic
novel-m0812-3p	novel_circ_000681	462	482	-25.3	0.769	CUAAUCCCAAAUCCCAAAUCA	xx|||||||||||||x||||x	AUUUAGGGUUUAGGGAUUAGA	NA	A05	+	16266240	16267457	1218	intergenic
miR6219-y	novel_circ_000682	1040	1057	-20.1	0.6091	GAUUUGGGAUUUGGAAUU	x||o||||x||||||||o	GUAGACCCGAAACCUUAG	NA	A05	-	16266240	16267457	1218	intergenic
novel-m0829-5p	novel_circ_000707	5107	5127	-25.6	0.7399	UGUUUUUAUCGUGAGUUUUUG	|||||||||||||||||ooox	ACAAAAAUAGCACUCAAGGGA	NA	A05	-	18960348	18967721	7374	intergenic
novel-m0026-5p	novel_circ_000708	4635	4656	-23.3	0.6068	ACUAAAAAACUACUCACUAUAA	|||||xx||||||||||||ox|	UGAUUGGUUGAUGAGUGAUGCU	Bra022290	A05	+	19311152	19318734	7583	antisense
miR11470-x	novel_circ_000710	3062	3080	-19.5	0.6522	UAAACCUUACUCCUAAAUA	x||||||x||||||||x||	CUUUGGAUUGAGGAUUGAU	Bra022233	A05	-	19626080	19639535	12568	exon_intron
miR11470-x	novel_circ_000710	10624	10642	-19.5	0.6522	UGAACCUCACUCCUAAGUA	xo|||||x||||||||x||	CUUUGGAUUGAGGAUUGAU	Bra022233	A05	-	19626080	19639535	12568	exon_intron
miR7533-y	novel_circ_000722	28	46	-26.5	0.7011	AACUCUUUCCUCUCUUCAA	xx|||o|||||||||||x|	GAGAGGAAGGAGAGAAGCU	Bra027209	A05	+	20441292	20441509	218	antisense
miR5021-x	novel_circ_000726	105	122	-19.9	0.6399	CUCUUCCUCUUCUUCUGC	||||||xx||||||||xx	GAGAAGACGAAGAAGAAC	Bra027283	A05	+	20826474	20826632	159	one_exon
miR5021-x	novel_circ_000744	2033	2050	-22.1	0.7391	UUCUUCUUCUUCUUCGAG	o||||||x|||||||xx|	GAGAAGACGAAGAAGAAC	Bra029718	A05	+	23256854	23259089	2236	antisense
miR5658-x	novel_circ_000744	910	929	-22.6	0.6975	CUACUACUACUACUACUACU	|||x||||||||||x|||||	GAUUAUGAUGAUGACGAUGA	Bra029718	A05	+	23256854	23259089	2236	antisense
miR5021-x	novel_circ_000745	4093	4110	-22.1	0.7391	UUCUUCUUCUUCUUCGAG	o||||||x|||||||xx|	GAGAAGACGAAGAAGAAC	Bra029717	A05	+	23259836	23266055	4761	exon_intron
miR5658-x	novel_circ_000745	2967	2986	-22.6	0.6975	CUACUACUACUACUACUACU	|||x||||||||||x|||||	GAUUAUGAUGAUGACGAUGA	Bra029717	A05	+	23259836	23266055	4761	exon_intron
miR472-y	novel_circ_000769	289	310	-28.4	0.644	AAAAGGGUUGAGGGGGGUAAGG	|||||||x|||||x|||||x||	UUUUCCCUACUCCACCCAUCCC	Bra018835	A06	+	1704172	1708911	4740	exon_intron
miR2275-x	novel_circ_000772	3437	3454	-20.7	0.7213	UAGGUUCCUUUUUUUUGA	|||xo|||||||o|||||	AUCGGAGGAAAAGAAACU	Bra018806	A06	-	1838105	1855480	12030	exon_intron
novel-m0853-3p	novel_circ_000772	3296	3316	-23.3	0.6657	UUAACAAUUAUUCAUCUCACC	|||||x|o||||||o|||||x	AAUUGGUGAUAAGUGGAGUGA	Bra018806	A06	-	1838105	1855480	12030	exon_intron
miR5721-x	novel_circ_000773	5545	5565	-26.9	0.7193	UGUUUACCUCACCCUUUAUGU	ox||||||||||||||||ox|	GAAAAUGGAGUGGGAAAUGGA	Bra018805	A06	+	1844450	1870581	24989	exon_intron
miR6164-y	novel_circ_000773	18011	18028	-22.9	0.7583	GUUUCACACUGCUUCCUC	o|||||||x|||o|||||	UAAAGUGUAACGGAGGAG	Bra018805	A06	+	1844450	1870581	24989	exon_intron
novel-m0084-5p	novel_circ_000773	11289	11309	-27.6	1	UUCCCUACAUCGAAAUUUUAA	|||||||||||o|||||||||	AAGGGAUGUAGUUUUAAAAUU	Bra018805	A06	+	1844450	1870581	24989	exon_intron
novel-m0135-3p	novel_circ_000781	899	919	-20.9	0.6764	AUGGUAAAUCCCAAAAUCUAA	||ox|||||||||||xo||||	UAUGAUUUAGGGUUUAGGAUU	Bra019874	A06	-	3934004	3939439	5436	exon_intron
novel-m0226-3p	novel_circ_000782	2223	2243	-28.1	0.7414	UUUUUGGGGCCGAUUCUCUGA	||o||||o|||||||x||||x	AAGAACCUCGGCUAAAAGACC	Bra019874	A06	+	3934004	3939439	5436	antisense
miR2275-x	novel_circ_000783	204	221	-19.5	0.6818	UUACCUCCUUUUCUUCUA	|xx||||||||||||xx|	AUCGGAGGAAAAGAAACU	Bra019865	A06	-	3972779	3978903	5870	exon_intron
miR5021-x	novel_circ_000784	3678	3695	-21	0.7023	UUUUUCUGCUUCUUCCUU	o|o||||||||||||x|x	GAGAAGACGAAGAAGAAC	Bra019866	A06	+	3972779	3978903	5684	exon_intron
miR2275-x	novel_circ_000785	215	232	-19.5	0.6818	UUACCUCCUUUUCUUCUA	|xx||||||||||||xx|	AUCGGAGGAAAAGAAACU	Bra019865	A06	-	3972864	3978914	5796	exon_intron
novel-m0964-5p	novel_circ_000800	898	918	-26.8	0.6458	AGCACCGGUGAAACGAUCUGA	|||||||x||||||xxx||||	UCGUGGCGACUUUGGACGACU	Bra019689	A06	+	4969794	4986298	14463	exon_intron
miR5021-x	novel_circ_000803	198	215	-20.4	0.6823	UUCGCCUGCUUCUUCUUC	o||xx||||||||||||x	GAGAAGACGAAGAAGAAC	Bra026192	A06	+	5370316	5370874	559	antisense
miR5072-x	novel_circ_000833	429	446	-23.1	0.6144	AGGGGCAACUUCAGGGUU	|||||xx|||||||x|x|	UCCCCAGUGAAGUCGCCA	Bra025911	A06	+	6751140	6751736	597	exon_intron
novel-m0036-3p	novel_circ_000842	3089	3109	-30.6	0.7907	ACUCUUUACCUCAUCCCAACC	|||||x|||||||x|||||||	UGAGAUAUGGAGUUGGGUUGG	Bra025805	A06	-	7803588	7808589	5002	intronic
novel-m0450-5p	novel_circ_000842	3189	3211	-31.6	0.8061	CAUUCCUUACGAGGUUGGGUUGA	|x|||||||||||o|||o|||o|	GCAAGGAAUGCUCUAACUCAAUU	Bra025805	A06	-	7803588	7808589	5002	intronic
miR1134-y	novel_circ_000856	23847	23865	-21.2	0.7138	UUCUUCUUCUUCUUCUUCU	|||x|x|||||||||||||	AAGCACAAGAAGAAGAAGA	Bra017969	A06	-	8862352	8891572	27244	exon_intron
miR5021-x	novel_circ_000856	23845	23862	-19.8	0.6556	UUCUUCUUCUUCUUCUAC	o||||||x||||||||xx	GAGAAGACGAAGAAGAAC	Bra017969	A06	-	8862352	8891572	27244	exon_intron
miR8594-x	novel_circ_000856	26510	26527	-18.6	0.6914	UACCUUCGCUCUUCGCUU	|||||xxo|||||||x||	AUGGAUAUGAGAAGCAAA	Bra017969	A06	-	8862352	8891572	27244	exon_intron
novel-m0460-3p	novel_circ_000856	1143	1165	-23.3	0.6297	UCUCACUAACACCACAACGGUGU	|||x|||||||||||x||x||o|	AGAAUGAUUGUGGUGAUGACAUA	Bra017969	A06	-	8862352	8891572	27244	exon_intron
novel-m0727-5p	novel_circ_000856	18095	18115	-23.9	0.6888	AAAUGUCUCAGACAUACUCAA	||||||||||||xx||||||x	UUUACAGAGUCUACAUGAGUC	Bra017969	A06	-	8862352	8891572	27244	exon_intron
miR2275-x	novel_circ_000857	9045	9062	-17.9	0.637	UGGGCUCCAUUUCUUUGU	|o|x||||x||||||||x	AUCGGAGGAAAAGAAACU	Bra017966	A06	+	8862352	8891572	28447	exon_intron
novel-m0713-3p	novel_circ_000857	8256	8275	-23.8	0.6899	UUAAAACGCAGAAACCAUGU	x||||||||||xx|||||||	UAUUUUGCGUCCGUGGUACA	Bra017966	A06	+	8862352	8891572	28447	exon_intron
novel-m0713-5p	novel_circ_000857	8315	8337	-25.8	0.6434	UAAGUACACUUGCUGUUUUAUGC	||x||||||||||||o|||x||x	AUCCAUGUGAACGACGAAAGACA	Bra017966	A06	+	8862352	8891572	28447	exon_intron
miR5021-x	novel_circ_000870	11742	11759	-22.1	0.7391	CUCUUCUCCUUCUUCUUC	|||||||x|||||||||x	GAGAAGACGAAGAAGAAC	Bra019416	A06	+	11410415	11499408	87976	exon_intron
miR5021-x	novel_circ_000870	68513	68530	-18.9	0.6279	CUCUUCUACUUCUUUUCA	|||||||x||||||o|xx	GAGAAGACGAAGAAGAAC	Bra019416	A06	+	11410415	11499408	87976	exon_intron
miR8594-x	novel_circ_000870	25591	25608	-16.9	0.6145	UACCAAUACUCUUCAAAU	||||x|||||||||xxx|	AUGGAUAUGAGAAGCAAA	Bra019416	A06	+	11410415	11499408	87976	exon_intron
novel-m0048-5p	novel_circ_000870	27348	27368	-26.2	0.7178	UCCCAAAUUUCAACUCUUCAC	||x|||||o|||||||o||||	AGAGUUUAGAGUUGAGGAGUG	Bra019416	A06	+	11410415	11499408	87976	exon_intron
novel-m0067-3p	novel_circ_000870	78736	78756	-18.2	0.6477	UAUAUAUACACAAAAAUCCUG	|x||||||||||x||x|||||	AAAUAUAUGUGUAUUAAGGAC	Bra019416	A06	+	11410415	11499408	87976	exon_intron
novel-m0117-3p	novel_circ_000870	27348	27368	-26.2	0.7178	UCCCAAAUUUCAACUCUUCAC	||x|||||o|||||||o||||	AGAGUUUAGAGUUGAGGAGUG	Bra019416	A06	+	11410415	11499408	87976	exon_intron
novel-m0135-3p	novel_circ_000870	27377	27397	-22.3	0.7217	AUCCCAAAUCCCAAAUCUCAA	||x|x||||||||||||ox||	UAUGAUUUAGGGUUUAGGAUU	Bra019416	A06	+	11410415	11499408	87976	exon_intron
novel-m0235-3p	novel_circ_000870	84703	84724	-25.1	0.7131	UUUUUAACUUUCGACUAAACCA	||x||x||||||||||||||||	AACAACUGAAAGCUGAUUUGGU	Bra019416	A06	+	11410415	11499408	87976	exon_intron
novel-m0270-5p	novel_circ_000870	27340	27362	-33.9	0.9137	AUUUCAACUCUUCACUCCAAAAC	||o|||||||||||||||||||x	UAGAGUUGAGAAGUGAGGUUUUA	Bra019416	A06	+	11410415	11499408	87976	exon_intron
novel-m0300-5p	novel_circ_000870	45127	45147	-29.1	0.6783	UAUACUGCCGAGUCUACUACG	|||x||||||||x|o||||||	AUAGGACGGCUCUGGUGAUGC	Bra019416	A06	+	11410415	11499408	87976	exon_intron
novel-m0399-3p	novel_circ_000870	27380	27400	-27.5	0.854	UAAAUCCCAAAUCCCAAAUCU	|||||||||||||||x|||||	AUUUAGGGUUUAGGGAUUAGA	Bra019416	A06	+	11410415	11499408	87976	exon_intron
novel-m0650-3p	novel_circ_000870	78736	78756	-18.2	0.6477	UAUAUAUACACAAAAAUCCUG	|x||||||||||x||x|||||	AAAUAUAUGUGUAUUAAGGAC	Bra019416	A06	+	11410415	11499408	87976	exon_intron
novel-m0673-3p	novel_circ_000870	27348	27368	-26.2	0.7178	UCCCAAAUUUCAACUCUUCAC	||x|||||o|||||||o||||	AGAGUUUAGAGUUGAGGAGUG	Bra019416	A06	+	11410415	11499408	87976	exon_intron
novel-m0727-5p	novel_circ_000870	18011	18031	-22	0.634	AAACGUCUUAGAUAUACUCAG	|||x||||o||||x|||||||	UUUACAGAGUCUACAUGAGUC	Bra019416	A06	+	11410415	11499408	87976	exon_intron
novel-m0760-3p	novel_circ_000870	27377	27398	-19.2	0.6057	AAUCCCAAAUCCCAAAUCUCAA	|||||x||||||x|||||x|||	UUAGGAUUUAGGAUUUAGUGUU	Bra019416	A06	+	11410415	11499408	87976	exon_intron
novel-m0766-3p	novel_circ_000870	27348	27368	-26.2	0.7178	UCCCAAAUUUCAACUCUUCAC	||x|||||o|||||||o||||	AGAGUUUAGAGUUGAGGAGUG	Bra019416	A06	+	11410415	11499408	87976	exon_intron
novel-m0812-3p	novel_circ_000870	27380	27400	-27.5	0.854	UAAAUCCCAAAUCCCAAAUCU	|||||||||||||||x|||||	AUUUAGGGUUUAGGGAUUAGA	Bra019416	A06	+	11410415	11499408	87976	exon_intron
novel-m0901-3p	novel_circ_000870	87718	87738	-32.5	0.7558	ACCUUGACUCUACGCGCUCAG	|||||||||||x||x||||||	UGGAACUGAGAGGCACGAGUC	Bra019416	A06	+	11410415	11499408	87976	exon_intron
miR5021-x	novel_circ_000872	23099	23116	-22.5	0.7525	UUCUUCUUCUUCUUCGUC	o||||||x|||||||x|x	GAGAAGACGAAGAAGAAC	Bra019435	A06	+	11701538	11726686	24848	exon_intron
miR5021-x	novel_circ_000872	24045	24062	-19.6	0.649	CAUUUCUGCUUCUUCAUU	|xo||||||||||||x|x	GAGAAGACGAAGAAGAAC	Bra019435	A06	+	11701538	11726686	24848	exon_intron
miR5021-x	novel_circ_000872	24185	24202	-20.4	0.6559	UUCUUCUUCUUCUUCUUU	o||||||x|||||||||x	GAGAAGACGAAGAAGAAC	Bra019435	A06	+	11701538	11726686	24848	exon_intron
novel-m0300-5p	novel_circ_000872	23331	23351	-38.3	0.8928	UAUCCUGCCGAGUCCACUACG	||||||||||||x||||||||	AUAGGACGGCUCUGGUGAUGC	Bra019435	A06	+	11701538	11726686	24848	exon_intron
novel-m0417-5p	novel_circ_000872	9560	9579	-20.8	0.6541	CACUUUACUUCAUUACUUUU	|x||||||o|||||||||x|	GAGAAAUGGAGUAAUGAACA	Bra019435	A06	+	11701538	11726686	24848	exon_intron
novel-m0750-5p	novel_circ_000872	9560	9579	-20.8	0.6541	CACUUUACUUCAUUACUUUU	|x||||||o|||||||||x|	GAGAAAUGGAGUAAUGAACA	Bra019435	A06	+	11701538	11726686	24848	exon_intron
novel-m0868-5p	novel_circ_000872	9560	9579	-20.8	0.6541	CACUUUACUUCAUUACUUUU	|x||||||o|||||||||x|	GAGAAAUGGAGUAAUGAACA	Bra019435	A06	+	11701538	11726686	24848	exon_intron
miR5021-x	novel_circ_000873	19490	19507	-22.5	0.7525	UUCUUCUUCUUCUUCGUC	o||||||x|||||||x|x	GAGAAGACGAAGAAGAAC	Bra019435	A06	+	11705147	11725634	20187	exon_intron
novel-m0300-5p	novel_circ_000873	19722	19742	-38.3	0.8928	UAUCCUGCCGAGUCCACUACG	||||||||||||x||||||||	AUAGGACGGCUCUGGUGAUGC	Bra019435	A06	+	11705147	11725634	20187	exon_intron
novel-m0417-5p	novel_circ_000873	5951	5970	-20.8	0.6541	CACUUUACUUCAUUACUUUU	|x||||||o|||||||||x|	GAGAAAUGGAGUAAUGAACA	Bra019435	A06	+	11705147	11725634	20187	exon_intron
novel-m0750-5p	novel_circ_000873	5951	5970	-20.8	0.6541	CACUUUACUUCAUUACUUUU	|x||||||o|||||||||x|	GAGAAAUGGAGUAAUGAACA	Bra019435	A06	+	11705147	11725634	20187	exon_intron
novel-m0868-5p	novel_circ_000873	5951	5970	-20.8	0.6541	CACUUUACUUCAUUACUUUU	|x||||||o|||||||||x|	GAGAAAUGGAGUAAUGAACA	Bra019435	A06	+	11705147	11725634	20187	exon_intron
miR1117-x	novel_circ_000918	53582	53599	-24.1	0.6195	AGGUUCAAGCACCUUGGU	|||xo||||||||x||||	UCCCGGUUCGUGGCACCA	Bra010138	A06	+	19434296	19523209	88516	exon_intron
miR12164-y	novel_circ_000918	62504	62521	-23.3	0.7169	CCUGAGGCUUACGGGUCC	xx||||||||||||x|x|	AAACUCCGAAUGCCGACG	Bra010138	A06	+	19434296	19523209	88516	exon_intron
miR6300-y	novel_circ_000918	3044	3061	-22.9	0.6815	CAGCAACAUCAUAUCACC	||x|x|||||||||||||	GUGGCUGUAGUAUAGUGG	Bra010138	A06	+	19434296	19523209	88516	exon_intron
miR8594-x	novel_circ_000918	1073	1090	-17.4	0.6468	UUCCUAUACUCUGCUGUU	|x||||||||||x|xx||	AUGGAUAUGAGAAGCAAA	Bra010138	A06	+	19434296	19523209	88516	exon_intron
miR8594-x	novel_circ_000918	55060	55077	-17.4	0.6468	UUCCUAUACUCUGCUGUU	|x||||||||||x|xx||	AUGGAUAUGAGAAGCAAA	Bra010138	A06	+	19434296	19523209	88516	exon_intron
novel-m0760-3p	novel_circ_000918	34407	34428	-28.6	0.9079	UAUCCUGAAUCCUAAAUCACUC	x|||||o|||||||||||||xx	UUAGGAUUUAGGAUUUAGUGUU	Bra010138	A06	+	19434296	19523209	88516	exon_intron
miR10516-x	novel_circ_000919	80258	80276	-26.5	0.726	UAGGAAACGUCUGCUGAAU	|||||x|||||||||||x|	AUCCUCUGCAGACGACUGA	Bra010149	A06	+	19760934	19848197	87146	exon_intron
miR2275-x	novel_circ_000919	83481	83498	-25.3	0.9068	UCGCCUCCUUUUCUUUGA	|x||||||||||||||||	AUCGGAGGAAAAGAAACU	Bra010149	A06	+	19760934	19848197	87146	exon_intron
miR3437-y	novel_circ_000919	84899	84917	-19.5	0.7303	UAGUCGCCUACAACGAAAA	|||o|o|||||||xo||||	AUCGGUGGAUGUUAUUUUU	Bra010149	A06	+	19760934	19848197	87146	exon_intron
miR4405-y	novel_circ_000919	81452	81469	-26.4	0.9263	UUGUUGGUUGAAUCUUGA	|||||||o||||||||||	AACAACCGACUUAGAACU	Bra010149	A06	+	19760934	19848197	87146	exon_intron
miR6300-y	novel_circ_000919	26279	26296	-21.5	0.6287	CCCCGACGUCAUACAACC	|x|||||o|||||xx|||	GUGGCUGUAGUAUAGUGG	Bra010149	A06	+	19760934	19848197	87146	exon_intron
miR8022-x	novel_circ_000919	82065	82083	-22.8	0.9913	GAGUUUACUCUUGAAACUC	o|o|||||||||||||||x	UUUAAAUGAGAACUUUGAA	Bra010149	A06	+	19760934	19848197	87146	exon_intron
novel-m0508-3p	novel_circ_000919	83527	83547	-52.1	1	CGCUGGGGUCCAGUCCGCCCU	|||||||||||||||||||||	GCGACCCCAGGUCAGGCGGGA	Bra010149	A06	+	19760934	19848197	87146	exon_intron
novel-m0516-3p	novel_circ_000919	81780	81801	-29.9	0.6765	UGCCAACCAUCUCGGACUGUGG	|||||||||||x|xo|||||x|	ACGGUUGGUAGCGGUUGACAGC	Bra010149	A06	+	19760934	19848197	87146	exon_intron
novel-m0657-3p	novel_circ_000919	81780	81801	-29.9	0.6765	UGCCAACCAUCUCGGACUGUGG	|||||||||||x|xo|||||x|	ACGGUUGGUAGCGGUUGACAGC	Bra010149	A06	+	19760934	19848197	87146	exon_intron
novel-m0733-5p	novel_circ_000919	48075	48096	-44.3	1	AACCGUCAAUCGGGAGAGAUCG	||||||||||||||||||||||	UUGGCAGUUAGCCCUCUCUAGC	Bra010149	A06	+	19760934	19848197	87146	exon_intron
miR4995-x	novel_circ_000920	61283	61301	-25.8	0.6632	CCGUCUCUGAACCACUUCU	|||||x|o||||||x|||o	GGCAGUGGCUUGGUUAAGG	Bra010149	A06	-	19760934	19848197	87264	antisense
miR10516-x	novel_circ_000921	80258	80276	-26.5	0.726	UAGGAAACGUCUGCUGAAU	|||||x|||||||||||x|	AUCCUCUGCAGACGACUGA	Bra010149	A06	+	19760934	19857277	96226	exon_intron
miR2275-x	novel_circ_000921	83481	83498	-25.3	0.9068	UCGCCUCCUUUUCUUUGA	|x||||||||||||||||	AUCGGAGGAAAAGAAACU	Bra010149	A06	+	19760934	19857277	96226	exon_intron
miR2275-x	novel_circ_000921	89423	89440	-25.3	0.9068	UCGCCUCCUUUUCUUUGG	|x|||||||||||||||o	AUCGGAGGAAAAGAAACU	Bra010149	A06	+	19760934	19857277	96226	exon_intron
miR3437-y	novel_circ_000921	84899	84917	-19.5	0.7303	UAGUCGCCUACAACGAAAA	|||o|o|||||||xo||||	AUCGGUGGAUGUUAUUUUU	Bra010149	A06	+	19760934	19857277	96226	exon_intron
miR3437-y	novel_circ_000921	93979	93997	-19.5	0.7303	UAGUCGCCUACAACGAAAA	|||o|o|||||||xo||||	AUCGGUGGAUGUUAUUUUU	Bra010149	A06	+	19760934	19857277	96226	exon_intron
miR4405-y	novel_circ_000921	81452	81469	-26.4	0.9263	UUGUUGGUUGAAUCUUGA	|||||||o||||||||||	AACAACCGACUUAGAACU	Bra010149	A06	+	19760934	19857277	96226	exon_intron
miR6300-y	novel_circ_000921	26279	26296	-21.5	0.6287	CCCCGACGUCAUACAACC	|x|||||o|||||xx|||	GUGGCUGUAGUAUAGUGG	Bra010149	A06	+	19760934	19857277	96226	exon_intron
miR8022-x	novel_circ_000921	82065	82083	-22.8	0.9913	GAGUUUACUCUUGAAACUC	o|o|||||||||||||||x	UUUAAAUGAGAACUUUGAA	Bra010149	A06	+	19760934	19857277	96226	exon_intron
novel-m0508-3p	novel_circ_000921	83527	83547	-52.1	1	CGCUGGGGUCCAGUCCGCCCU	|||||||||||||||||||||	GCGACCCCAGGUCAGGCGGGA	Bra010149	A06	+	19760934	19857277	96226	exon_intron
novel-m0516-3p	novel_circ_000921	81780	81801	-29.9	0.6765	UGCCAACCAUCUCGGACUGUGG	|||||||||||x|xo|||||x|	ACGGUUGGUAGCGGUUGACAGC	Bra010149	A06	+	19760934	19857277	96226	exon_intron
novel-m0657-3p	novel_circ_000921	81780	81801	-29.9	0.6765	UGCCAACCAUCUCGGACUGUGG	|||||||||||x|xo|||||x|	ACGGUUGGUAGCGGUUGACAGC	Bra010149	A06	+	19760934	19857277	96226	exon_intron
novel-m0733-5p	novel_circ_000921	48075	48096	-44.3	1	AACCGUCAAUCGGGAGAGAUCG	||||||||||||||||||||||	UUGGCAGUUAGCCCUCUCUAGC	Bra010149	A06	+	19760934	19857277	96226	exon_intron
miR4995-x	novel_circ_000922	70363	70381	-25.8	0.6632	CCGUCUCUGAACCACUUCU	|||||x|o||||||x|||o	GGCAGUGGCUUGGUUAAGG	Bra010149	A06	-	19760934	19857277	96344	antisense
miR4995-x	novel_circ_000923	70429	70447	-25.8	0.6632	CCGUCUCUGAACCACUUCU	|||||x|o||||||x|||o	GGCAGUGGCUUGGUUAAGG	Bra010149	A06	-	19760938	19857343	96406	antisense
miR4995-x	novel_circ_000924	61283	61301	-25.8	0.6632	CCGUCUCUGAACCACUUCU	|||||x|o||||||x|||o	GGCAGUGGCUUGGUUAAGG	Bra010149	A06	-	19785913	19848197	62285	antisense
miR4995-x	novel_circ_000925	70363	70381	-25.8	0.6632	CCGUCUCUGAACCACUUCU	|||||x|o||||||x|||o	GGCAGUGGCUUGGUUAAGG	Bra010149	A06	-	19785913	19857277	71365	antisense
miR10516-x	novel_circ_000926	55279	55297	-26.5	0.726	UAGGAAACGUCUGCUGAAU	|||||x|||||||||||x|	AUCCUCUGCAGACGACUGA	Bra010149	A06	+	19785913	19857277	71247	exon_intron
miR2275-x	novel_circ_000926	58502	58519	-25.3	0.9068	UCGCCUCCUUUUCUUUGA	|x||||||||||||||||	AUCGGAGGAAAAGAAACU	Bra010149	A06	+	19785913	19857277	71247	exon_intron
miR2275-x	novel_circ_000926	64444	64461	-25.3	0.9068	UCGCCUCCUUUUCUUUGG	|x|||||||||||||||o	AUCGGAGGAAAAGAAACU	Bra010149	A06	+	19785913	19857277	71247	exon_intron
miR3437-y	novel_circ_000926	59920	59938	-19.5	0.7303	UAGUCGCCUACAACGAAAA	|||o|o|||||||xo||||	AUCGGUGGAUGUUAUUUUU	Bra010149	A06	+	19785913	19857277	71247	exon_intron
miR3437-y	novel_circ_000926	69000	69018	-19.5	0.7303	UAGUCGCCUACAACGAAAA	|||o|o|||||||xo||||	AUCGGUGGAUGUUAUUUUU	Bra010149	A06	+	19785913	19857277	71247	exon_intron
miR4405-y	novel_circ_000926	56473	56490	-26.4	0.9263	UUGUUGGUUGAAUCUUGA	|||||||o||||||||||	AACAACCGACUUAGAACU	Bra010149	A06	+	19785913	19857277	71247	exon_intron
miR6300-y	novel_circ_000926	1300	1317	-21.5	0.6287	CCCCGACGUCAUACAACC	|x|||||o|||||xx|||	GUGGCUGUAGUAUAGUGG	Bra010149	A06	+	19785913	19857277	71247	exon_intron
miR8022-x	novel_circ_000926	57086	57104	-22.8	0.9913	GAGUUUACUCUUGAAACUC	o|o|||||||||||||||x	UUUAAAUGAGAACUUUGAA	Bra010149	A06	+	19785913	19857277	71247	exon_intron
novel-m0508-3p	novel_circ_000926	58548	58568	-52.1	1	CGCUGGGGUCCAGUCCGCCCU	|||||||||||||||||||||	GCGACCCCAGGUCAGGCGGGA	Bra010149	A06	+	19785913	19857277	71247	exon_intron
novel-m0516-3p	novel_circ_000926	56801	56822	-29.9	0.6765	UGCCAACCAUCUCGGACUGUGG	|||||||||||x|xo|||||x|	ACGGUUGGUAGCGGUUGACAGC	Bra010149	A06	+	19785913	19857277	71247	exon_intron
novel-m0657-3p	novel_circ_000926	56801	56822	-29.9	0.6765	UGCCAACCAUCUCGGACUGUGG	|||||||||||x|xo|||||x|	ACGGUUGGUAGCGGUUGACAGC	Bra010149	A06	+	19785913	19857277	71247	exon_intron
novel-m0733-5p	novel_circ_000926	23096	23117	-44.3	1	AACCGUCAAUCGGGAGAGAUCG	||||||||||||||||||||||	UUGGCAGUUAGCCCUCUCUAGC	Bra010149	A06	+	19785913	19857277	71247	exon_intron
miR10516-x	novel_circ_000927	55275	55293	-26.5	0.726	UAGGAAACGUCUGCUGAAU	|||||x|||||||||||x|	AUCCUCUGCAGACGACUGA	Bra010149	A06	+	19785917	19848242	62208	exon_intron
miR2275-x	novel_circ_000927	58498	58515	-25.3	0.9068	UCGCCUCCUUUUCUUUGA	|x||||||||||||||||	AUCGGAGGAAAAGAAACU	Bra010149	A06	+	19785917	19848242	62208	exon_intron
miR3437-y	novel_circ_000927	59916	59934	-19.5	0.7303	UAGUCGCCUACAACGAAAA	|||o|o|||||||xo||||	AUCGGUGGAUGUUAUUUUU	Bra010149	A06	+	19785917	19848242	62208	exon_intron
miR4405-y	novel_circ_000927	56469	56486	-26.4	0.9263	UUGUUGGUUGAAUCUUGA	|||||||o||||||||||	AACAACCGACUUAGAACU	Bra010149	A06	+	19785917	19848242	62208	exon_intron
miR6300-y	novel_circ_000927	1296	1313	-21.5	0.6287	CCCCGACGUCAUACAACC	|x|||||o|||||xx|||	GUGGCUGUAGUAUAGUGG	Bra010149	A06	+	19785917	19848242	62208	exon_intron
miR8022-x	novel_circ_000927	57082	57100	-22.8	0.9913	GAGUUUACUCUUGAAACUC	o|o|||||||||||||||x	UUUAAAUGAGAACUUUGAA	Bra010149	A06	+	19785917	19848242	62208	exon_intron
novel-m0508-3p	novel_circ_000927	58544	58564	-52.1	1	CGCUGGGGUCCAGUCCGCCCU	|||||||||||||||||||||	GCGACCCCAGGUCAGGCGGGA	Bra010149	A06	+	19785917	19848242	62208	exon_intron
novel-m0516-3p	novel_circ_000927	56797	56818	-29.9	0.6765	UGCCAACCAUCUCGGACUGUGG	|||||||||||x|xo|||||x|	ACGGUUGGUAGCGGUUGACAGC	Bra010149	A06	+	19785917	19848242	62208	exon_intron
novel-m0657-3p	novel_circ_000927	56797	56818	-29.9	0.6765	UGCCAACCAUCUCGGACUGUGG	|||||||||||x|xo|||||x|	ACGGUUGGUAGCGGUUGACAGC	Bra010149	A06	+	19785917	19848242	62208	exon_intron
novel-m0733-5p	novel_circ_000927	23092	23113	-44.3	1	AACCGUCAAUCGGGAGAGAUCG	||||||||||||||||||||||	UUGGCAGUUAGCCCUCUCUAGC	Bra010149	A06	+	19785917	19848242	62208	exon_intron
miR10516-x	novel_circ_000928	55274	55292	-26.5	0.726	UAGGAAACGUCUGCUGAAU	|||||x|||||||||||x|	AUCCUCUGCAGACGACUGA	Bra010149	A06	+	19785918	19848243	62208	exon_intron
miR2275-x	novel_circ_000928	58497	58514	-25.3	0.9068	UCGCCUCCUUUUCUUUGA	|x||||||||||||||||	AUCGGAGGAAAAGAAACU	Bra010149	A06	+	19785918	19848243	62208	exon_intron
miR3437-y	novel_circ_000928	59915	59933	-19.5	0.7303	UAGUCGCCUACAACGAAAA	|||o|o|||||||xo||||	AUCGGUGGAUGUUAUUUUU	Bra010149	A06	+	19785918	19848243	62208	exon_intron
miR4405-y	novel_circ_000928	56468	56485	-26.4	0.9263	UUGUUGGUUGAAUCUUGA	|||||||o||||||||||	AACAACCGACUUAGAACU	Bra010149	A06	+	19785918	19848243	62208	exon_intron
miR6300-y	novel_circ_000928	1295	1312	-21.5	0.6287	CCCCGACGUCAUACAACC	|x|||||o|||||xx|||	GUGGCUGUAGUAUAGUGG	Bra010149	A06	+	19785918	19848243	62208	exon_intron
miR8022-x	novel_circ_000928	57081	57099	-22.8	0.9913	GAGUUUACUCUUGAAACUC	o|o|||||||||||||||x	UUUAAAUGAGAACUUUGAA	Bra010149	A06	+	19785918	19848243	62208	exon_intron
novel-m0508-3p	novel_circ_000928	58543	58563	-52.1	1	CGCUGGGGUCCAGUCCGCCCU	|||||||||||||||||||||	GCGACCCCAGGUCAGGCGGGA	Bra010149	A06	+	19785918	19848243	62208	exon_intron
novel-m0516-3p	novel_circ_000928	56796	56817	-29.9	0.6765	UGCCAACCAUCUCGGACUGUGG	|||||||||||x|xo|||||x|	ACGGUUGGUAGCGGUUGACAGC	Bra010149	A06	+	19785918	19848243	62208	exon_intron
novel-m0657-3p	novel_circ_000928	56796	56817	-29.9	0.6765	UGCCAACCAUCUCGGACUGUGG	|||||||||||x|xo|||||x|	ACGGUUGGUAGCGGUUGACAGC	Bra010149	A06	+	19785918	19848243	62208	exon_intron
novel-m0733-5p	novel_circ_000928	23091	23112	-44.3	1	AACCGUCAAUCGGGAGAGAUCG	||||||||||||||||||||||	UUGGCAGUUAGCCCUCUCUAGC	Bra010149	A06	+	19785918	19848243	62208	exon_intron
miR10516-x	novel_circ_000929	55264	55282	-26.5	0.726	UAGGAAACGUCUGCUGAAU	|||||x|||||||||||x|	AUCCUCUGCAGACGACUGA	Bra010149	A06	+	19785928	19848222	62177	exon_intron
miR2275-x	novel_circ_000929	58487	58504	-25.3	0.9068	UCGCCUCCUUUUCUUUGA	|x||||||||||||||||	AUCGGAGGAAAAGAAACU	Bra010149	A06	+	19785928	19848222	62177	exon_intron
miR3437-y	novel_circ_000929	59905	59923	-19.5	0.7303	UAGUCGCCUACAACGAAAA	|||o|o|||||||xo||||	AUCGGUGGAUGUUAUUUUU	Bra010149	A06	+	19785928	19848222	62177	exon_intron
miR4405-y	novel_circ_000929	56458	56475	-26.4	0.9263	UUGUUGGUUGAAUCUUGA	|||||||o||||||||||	AACAACCGACUUAGAACU	Bra010149	A06	+	19785928	19848222	62177	exon_intron
miR6300-y	novel_circ_000929	1285	1302	-21.5	0.6287	CCCCGACGUCAUACAACC	|x|||||o|||||xx|||	GUGGCUGUAGUAUAGUGG	Bra010149	A06	+	19785928	19848222	62177	exon_intron
miR8022-x	novel_circ_000929	57071	57089	-22.8	0.9913	GAGUUUACUCUUGAAACUC	o|o|||||||||||||||x	UUUAAAUGAGAACUUUGAA	Bra010149	A06	+	19785928	19848222	62177	exon_intron
novel-m0508-3p	novel_circ_000929	58533	58553	-52.1	1	CGCUGGGGUCCAGUCCGCCCU	|||||||||||||||||||||	GCGACCCCAGGUCAGGCGGGA	Bra010149	A06	+	19785928	19848222	62177	exon_intron
novel-m0516-3p	novel_circ_000929	56786	56807	-29.9	0.6765	UGCCAACCAUCUCGGACUGUGG	|||||||||||x|xo|||||x|	ACGGUUGGUAGCGGUUGACAGC	Bra010149	A06	+	19785928	19848222	62177	exon_intron
novel-m0657-3p	novel_circ_000929	56786	56807	-29.9	0.6765	UGCCAACCAUCUCGGACUGUGG	|||||||||||x|xo|||||x|	ACGGUUGGUAGCGGUUGACAGC	Bra010149	A06	+	19785928	19848222	62177	exon_intron
novel-m0733-5p	novel_circ_000929	23081	23102	-44.3	1	AACCGUCAAUCGGGAGAGAUCG	||||||||||||||||||||||	UUGGCAGUUAGCCCUCUCUAGC	Bra010149	A06	+	19785928	19848222	62177	exon_intron
miR10516-x	novel_circ_000930	55264	55282	-26.5	0.726	UAGGAAACGUCUGCUGAAU	|||||x|||||||||||x|	AUCCUCUGCAGACGACUGA	Bra010149	A06	+	19785928	19857302	71257	exon_intron
miR2275-x	novel_circ_000930	58487	58504	-25.3	0.9068	UCGCCUCCUUUUCUUUGA	|x||||||||||||||||	AUCGGAGGAAAAGAAACU	Bra010149	A06	+	19785928	19857302	71257	exon_intron
miR2275-x	novel_circ_000930	64429	64446	-25.3	0.9068	UCGCCUCCUUUUCUUUGG	|x|||||||||||||||o	AUCGGAGGAAAAGAAACU	Bra010149	A06	+	19785928	19857302	71257	exon_intron
miR3437-y	novel_circ_000930	59905	59923	-19.5	0.7303	UAGUCGCCUACAACGAAAA	|||o|o|||||||xo||||	AUCGGUGGAUGUUAUUUUU	Bra010149	A06	+	19785928	19857302	71257	exon_intron
miR3437-y	novel_circ_000930	68985	69003	-19.5	0.7303	UAGUCGCCUACAACGAAAA	|||o|o|||||||xo||||	AUCGGUGGAUGUUAUUUUU	Bra010149	A06	+	19785928	19857302	71257	exon_intron
miR4405-y	novel_circ_000930	56458	56475	-26.4	0.9263	UUGUUGGUUGAAUCUUGA	|||||||o||||||||||	AACAACCGACUUAGAACU	Bra010149	A06	+	19785928	19857302	71257	exon_intron
miR6300-y	novel_circ_000930	1285	1302	-21.5	0.6287	CCCCGACGUCAUACAACC	|x|||||o|||||xx|||	GUGGCUGUAGUAUAGUGG	Bra010149	A06	+	19785928	19857302	71257	exon_intron
miR8022-x	novel_circ_000930	57071	57089	-22.8	0.9913	GAGUUUACUCUUGAAACUC	o|o|||||||||||||||x	UUUAAAUGAGAACUUUGAA	Bra010149	A06	+	19785928	19857302	71257	exon_intron
novel-m0508-3p	novel_circ_000930	58533	58553	-52.1	1	CGCUGGGGUCCAGUCCGCCCU	|||||||||||||||||||||	GCGACCCCAGGUCAGGCGGGA	Bra010149	A06	+	19785928	19857302	71257	exon_intron
novel-m0516-3p	novel_circ_000930	56786	56807	-29.9	0.6765	UGCCAACCAUCUCGGACUGUGG	|||||||||||x|xo|||||x|	ACGGUUGGUAGCGGUUGACAGC	Bra010149	A06	+	19785928	19857302	71257	exon_intron
novel-m0657-3p	novel_circ_000930	56786	56807	-29.9	0.6765	UGCCAACCAUCUCGGACUGUGG	|||||||||||x|xo|||||x|	ACGGUUGGUAGCGGUUGACAGC	Bra010149	A06	+	19785928	19857302	71257	exon_intron
novel-m0733-5p	novel_circ_000930	23081	23102	-44.3	1	AACCGUCAAUCGGGAGAGAUCG	||||||||||||||||||||||	UUGGCAGUUAGCCCUCUCUAGC	Bra010149	A06	+	19785928	19857302	71257	exon_intron
miR10516-x	novel_circ_000931	55256	55274	-26.5	0.726	UAGGAAACGUCUGCUGAAU	|||||x|||||||||||x|	AUCCUCUGCAGACGACUGA	Bra010149	A06	+	19785936	19857750	71697	exon_intron
miR2275-x	novel_circ_000931	58479	58496	-25.3	0.9068	UCGCCUCCUUUUCUUUGA	|x||||||||||||||||	AUCGGAGGAAAAGAAACU	Bra010149	A06	+	19785936	19857750	71697	exon_intron
miR2275-x	novel_circ_000931	64421	64438	-25.3	0.9068	UCGCCUCCUUUUCUUUGG	|x|||||||||||||||o	AUCGGAGGAAAAGAAACU	Bra010149	A06	+	19785936	19857750	71697	exon_intron
miR3437-y	novel_circ_000931	59897	59915	-19.5	0.7303	UAGUCGCCUACAACGAAAA	|||o|o|||||||xo||||	AUCGGUGGAUGUUAUUUUU	Bra010149	A06	+	19785936	19857750	71697	exon_intron
miR3437-y	novel_circ_000931	68977	68995	-19.5	0.7303	UAGUCGCCUACAACGAAAA	|||o|o|||||||xo||||	AUCGGUGGAUGUUAUUUUU	Bra010149	A06	+	19785936	19857750	71697	exon_intron
miR4405-y	novel_circ_000931	56450	56467	-26.4	0.9263	UUGUUGGUUGAAUCUUGA	|||||||o||||||||||	AACAACCGACUUAGAACU	Bra010149	A06	+	19785936	19857750	71697	exon_intron
miR6300-y	novel_circ_000931	1277	1294	-21.5	0.6287	CCCCGACGUCAUACAACC	|x|||||o|||||xx|||	GUGGCUGUAGUAUAGUGG	Bra010149	A06	+	19785936	19857750	71697	exon_intron
miR8022-x	novel_circ_000931	57063	57081	-22.8	0.9913	GAGUUUACUCUUGAAACUC	o|o|||||||||||||||x	UUUAAAUGAGAACUUUGAA	Bra010149	A06	+	19785936	19857750	71697	exon_intron
novel-m0508-3p	novel_circ_000931	58525	58545	-52.1	1	CGCUGGGGUCCAGUCCGCCCU	|||||||||||||||||||||	GCGACCCCAGGUCAGGCGGGA	Bra010149	A06	+	19785936	19857750	71697	exon_intron
novel-m0516-3p	novel_circ_000931	56778	56799	-29.9	0.6765	UGCCAACCAUCUCGGACUGUGG	|||||||||||x|xo|||||x|	ACGGUUGGUAGCGGUUGACAGC	Bra010149	A06	+	19785936	19857750	71697	exon_intron
novel-m0657-3p	novel_circ_000931	56778	56799	-29.9	0.6765	UGCCAACCAUCUCGGACUGUGG	|||||||||||x|xo|||||x|	ACGGUUGGUAGCGGUUGACAGC	Bra010149	A06	+	19785936	19857750	71697	exon_intron
novel-m0733-5p	novel_circ_000931	23073	23094	-44.3	1	AACCGUCAAUCGGGAGAGAUCG	||||||||||||||||||||||	UUGGCAGUUAGCCCUCUCUAGC	Bra010149	A06	+	19785936	19857750	71697	exon_intron
miR10516-x	novel_circ_000932	55256	55274	-26.5	0.726	UAGGAAACGUCUGCUGAAU	|||||x|||||||||||x|	AUCCUCUGCAGACGACUGA	Bra010149	A06	+	19785936	19858149	72096	exon_intron
miR2275-x	novel_circ_000932	58479	58496	-25.3	0.9068	UCGCCUCCUUUUCUUUGA	|x||||||||||||||||	AUCGGAGGAAAAGAAACU	Bra010149	A06	+	19785936	19858149	72096	exon_intron
miR2275-x	novel_circ_000932	64421	64438	-25.3	0.9068	UCGCCUCCUUUUCUUUGG	|x|||||||||||||||o	AUCGGAGGAAAAGAAACU	Bra010149	A06	+	19785936	19858149	72096	exon_intron
miR3437-y	novel_circ_000932	59897	59915	-19.5	0.7303	UAGUCGCCUACAACGAAAA	|||o|o|||||||xo||||	AUCGGUGGAUGUUAUUUUU	Bra010149	A06	+	19785936	19858149	72096	exon_intron
miR3437-y	novel_circ_000932	68977	68995	-19.5	0.7303	UAGUCGCCUACAACGAAAA	|||o|o|||||||xo||||	AUCGGUGGAUGUUAUUUUU	Bra010149	A06	+	19785936	19858149	72096	exon_intron
miR4405-y	novel_circ_000932	56450	56467	-26.4	0.9263	UUGUUGGUUGAAUCUUGA	|||||||o||||||||||	AACAACCGACUUAGAACU	Bra010149	A06	+	19785936	19858149	72096	exon_intron
miR6300-y	novel_circ_000932	1277	1294	-21.5	0.6287	CCCCGACGUCAUACAACC	|x|||||o|||||xx|||	GUGGCUGUAGUAUAGUGG	Bra010149	A06	+	19785936	19858149	72096	exon_intron
miR8022-x	novel_circ_000932	57063	57081	-22.8	0.9913	GAGUUUACUCUUGAAACUC	o|o|||||||||||||||x	UUUAAAUGAGAACUUUGAA	Bra010149	A06	+	19785936	19858149	72096	exon_intron
novel-m0508-3p	novel_circ_000932	58525	58545	-52.1	1	CGCUGGGGUCCAGUCCGCCCU	|||||||||||||||||||||	GCGACCCCAGGUCAGGCGGGA	Bra010149	A06	+	19785936	19858149	72096	exon_intron
novel-m0516-3p	novel_circ_000932	56778	56799	-29.9	0.6765	UGCCAACCAUCUCGGACUGUGG	|||||||||||x|xo|||||x|	ACGGUUGGUAGCGGUUGACAGC	Bra010149	A06	+	19785936	19858149	72096	exon_intron
novel-m0657-3p	novel_circ_000932	56778	56799	-29.9	0.6765	UGCCAACCAUCUCGGACUGUGG	|||||||||||x|xo|||||x|	ACGGUUGGUAGCGGUUGACAGC	Bra010149	A06	+	19785936	19858149	72096	exon_intron
novel-m0733-5p	novel_circ_000932	23073	23094	-44.3	1	AACCGUCAAUCGGGAGAGAUCG	||||||||||||||||||||||	UUGGCAGUUAGCCCUCUCUAGC	Bra010149	A06	+	19785936	19858149	72096	exon_intron
miR10516-x	novel_circ_000933	55256	55274	-26.5	0.726	UAGGAAACGUCUGCUGAAU	|||||x|||||||||||x|	AUCCUCUGCAGACGACUGA	Bra010149	A06	+	19785936	19858548	72495	exon_intron
miR2275-x	novel_circ_000933	58479	58496	-25.3	0.9068	UCGCCUCCUUUUCUUUGA	|x||||||||||||||||	AUCGGAGGAAAAGAAACU	Bra010149	A06	+	19785936	19858548	72495	exon_intron
miR2275-x	novel_circ_000933	64421	64438	-25.3	0.9068	UCGCCUCCUUUUCUUUGG	|x|||||||||||||||o	AUCGGAGGAAAAGAAACU	Bra010149	A06	+	19785936	19858548	72495	exon_intron
miR3437-y	novel_circ_000933	59897	59915	-19.5	0.7303	UAGUCGCCUACAACGAAAA	|||o|o|||||||xo||||	AUCGGUGGAUGUUAUUUUU	Bra010149	A06	+	19785936	19858548	72495	exon_intron
miR3437-y	novel_circ_000933	68977	68995	-19.5	0.7303	UAGUCGCCUACAACGAAAA	|||o|o|||||||xo||||	AUCGGUGGAUGUUAUUUUU	Bra010149	A06	+	19785936	19858548	72495	exon_intron
miR4405-y	novel_circ_000933	56450	56467	-26.4	0.9263	UUGUUGGUUGAAUCUUGA	|||||||o||||||||||	AACAACCGACUUAGAACU	Bra010149	A06	+	19785936	19858548	72495	exon_intron
miR6300-y	novel_circ_000933	1277	1294	-21.5	0.6287	CCCCGACGUCAUACAACC	|x|||||o|||||xx|||	GUGGCUGUAGUAUAGUGG	Bra010149	A06	+	19785936	19858548	72495	exon_intron
miR8022-x	novel_circ_000933	57063	57081	-22.8	0.9913	GAGUUUACUCUUGAAACUC	o|o|||||||||||||||x	UUUAAAUGAGAACUUUGAA	Bra010149	A06	+	19785936	19858548	72495	exon_intron
novel-m0508-3p	novel_circ_000933	58525	58545	-52.1	1	CGCUGGGGUCCAGUCCGCCCU	|||||||||||||||||||||	GCGACCCCAGGUCAGGCGGGA	Bra010149	A06	+	19785936	19858548	72495	exon_intron
novel-m0516-3p	novel_circ_000933	56778	56799	-29.9	0.6765	UGCCAACCAUCUCGGACUGUGG	|||||||||||x|xo|||||x|	ACGGUUGGUAGCGGUUGACAGC	Bra010149	A06	+	19785936	19858548	72495	exon_intron
novel-m0657-3p	novel_circ_000933	56778	56799	-29.9	0.6765	UGCCAACCAUCUCGGACUGUGG	|||||||||||x|xo|||||x|	ACGGUUGGUAGCGGUUGACAGC	Bra010149	A06	+	19785936	19858548	72495	exon_intron
novel-m0733-5p	novel_circ_000933	23073	23094	-44.3	1	AACCGUCAAUCGGGAGAGAUCG	||||||||||||||||||||||	UUGGCAGUUAGCCCUCUCUAGC	Bra010149	A06	+	19785936	19858548	72495	exon_intron
miR10516-x	novel_circ_000934	55256	55274	-26.5	0.726	UAGGAAACGUCUGCUGAAU	|||||x|||||||||||x|	AUCCUCUGCAGACGACUGA	Bra010149	A06	+	19785936	19858947	72894	exon_intron
miR2275-x	novel_circ_000934	58479	58496	-25.3	0.9068	UCGCCUCCUUUUCUUUGA	|x||||||||||||||||	AUCGGAGGAAAAGAAACU	Bra010149	A06	+	19785936	19858947	72894	exon_intron
miR2275-x	novel_circ_000934	64421	64438	-25.3	0.9068	UCGCCUCCUUUUCUUUGG	|x|||||||||||||||o	AUCGGAGGAAAAGAAACU	Bra010149	A06	+	19785936	19858947	72894	exon_intron
miR3437-y	novel_circ_000934	59897	59915	-19.5	0.7303	UAGUCGCCUACAACGAAAA	|||o|o|||||||xo||||	AUCGGUGGAUGUUAUUUUU	Bra010149	A06	+	19785936	19858947	72894	exon_intron
miR3437-y	novel_circ_000934	68977	68995	-19.5	0.7303	UAGUCGCCUACAACGAAAA	|||o|o|||||||xo||||	AUCGGUGGAUGUUAUUUUU	Bra010149	A06	+	19785936	19858947	72894	exon_intron
miR4405-y	novel_circ_000934	56450	56467	-26.4	0.9263	UUGUUGGUUGAAUCUUGA	|||||||o||||||||||	AACAACCGACUUAGAACU	Bra010149	A06	+	19785936	19858947	72894	exon_intron
miR6300-y	novel_circ_000934	1277	1294	-21.5	0.6287	CCCCGACGUCAUACAACC	|x|||||o|||||xx|||	GUGGCUGUAGUAUAGUGG	Bra010149	A06	+	19785936	19858947	72894	exon_intron
miR8022-x	novel_circ_000934	57063	57081	-22.8	0.9913	GAGUUUACUCUUGAAACUC	o|o|||||||||||||||x	UUUAAAUGAGAACUUUGAA	Bra010149	A06	+	19785936	19858947	72894	exon_intron
novel-m0508-3p	novel_circ_000934	58525	58545	-52.1	1	CGCUGGGGUCCAGUCCGCCCU	|||||||||||||||||||||	GCGACCCCAGGUCAGGCGGGA	Bra010149	A06	+	19785936	19858947	72894	exon_intron
novel-m0516-3p	novel_circ_000934	56778	56799	-29.9	0.6765	UGCCAACCAUCUCGGACUGUGG	|||||||||||x|xo|||||x|	ACGGUUGGUAGCGGUUGACAGC	Bra010149	A06	+	19785936	19858947	72894	exon_intron
novel-m0657-3p	novel_circ_000934	56778	56799	-29.9	0.6765	UGCCAACCAUCUCGGACUGUGG	|||||||||||x|xo|||||x|	ACGGUUGGUAGCGGUUGACAGC	Bra010149	A06	+	19785936	19858947	72894	exon_intron
novel-m0733-5p	novel_circ_000934	23073	23094	-44.3	1	AACCGUCAAUCGGGAGAGAUCG	||||||||||||||||||||||	UUGGCAGUUAGCCCUCUCUAGC	Bra010149	A06	+	19785936	19858947	72894	exon_intron
miR10516-x	novel_circ_000935	55256	55274	-26.5	0.726	UAGGAAACGUCUGCUGAAU	|||||x|||||||||||x|	AUCCUCUGCAGACGACUGA	Bra010149	A06	+	19785936	19859346	73293	exon_intron
miR2275-x	novel_circ_000935	58479	58496	-25.3	0.9068	UCGCCUCCUUUUCUUUGA	|x||||||||||||||||	AUCGGAGGAAAAGAAACU	Bra010149	A06	+	19785936	19859346	73293	exon_intron
miR2275-x	novel_circ_000935	64421	64438	-25.3	0.9068	UCGCCUCCUUUUCUUUGG	|x|||||||||||||||o	AUCGGAGGAAAAGAAACU	Bra010149	A06	+	19785936	19859346	73293	exon_intron
miR3437-y	novel_circ_000935	59897	59915	-19.5	0.7303	UAGUCGCCUACAACGAAAA	|||o|o|||||||xo||||	AUCGGUGGAUGUUAUUUUU	Bra010149	A06	+	19785936	19859346	73293	exon_intron
miR3437-y	novel_circ_000935	68977	68995	-19.5	0.7303	UAGUCGCCUACAACGAAAA	|||o|o|||||||xo||||	AUCGGUGGAUGUUAUUUUU	Bra010149	A06	+	19785936	19859346	73293	exon_intron
miR4405-y	novel_circ_000935	56450	56467	-26.4	0.9263	UUGUUGGUUGAAUCUUGA	|||||||o||||||||||	AACAACCGACUUAGAACU	Bra010149	A06	+	19785936	19859346	73293	exon_intron
miR6300-y	novel_circ_000935	1277	1294	-21.5	0.6287	CCCCGACGUCAUACAACC	|x|||||o|||||xx|||	GUGGCUGUAGUAUAGUGG	Bra010149	A06	+	19785936	19859346	73293	exon_intron
miR8022-x	novel_circ_000935	57063	57081	-22.8	0.9913	GAGUUUACUCUUGAAACUC	o|o|||||||||||||||x	UUUAAAUGAGAACUUUGAA	Bra010149	A06	+	19785936	19859346	73293	exon_intron
novel-m0508-3p	novel_circ_000935	58525	58545	-52.1	1	CGCUGGGGUCCAGUCCGCCCU	|||||||||||||||||||||	GCGACCCCAGGUCAGGCGGGA	Bra010149	A06	+	19785936	19859346	73293	exon_intron
novel-m0516-3p	novel_circ_000935	56778	56799	-29.9	0.6765	UGCCAACCAUCUCGGACUGUGG	|||||||||||x|xo|||||x|	ACGGUUGGUAGCGGUUGACAGC	Bra010149	A06	+	19785936	19859346	73293	exon_intron
novel-m0657-3p	novel_circ_000935	56778	56799	-29.9	0.6765	UGCCAACCAUCUCGGACUGUGG	|||||||||||x|xo|||||x|	ACGGUUGGUAGCGGUUGACAGC	Bra010149	A06	+	19785936	19859346	73293	exon_intron
novel-m0733-5p	novel_circ_000935	23073	23094	-44.3	1	AACCGUCAAUCGGGAGAGAUCG	||||||||||||||||||||||	UUGGCAGUUAGCCCUCUCUAGC	Bra010149	A06	+	19785936	19859346	73293	exon_intron
miR10516-x	novel_circ_000936	55256	55274	-26.5	0.726	UAGGAAACGUCUGCUGAAU	|||||x|||||||||||x|	AUCCUCUGCAGACGACUGA	Bra010149	A06	+	19785936	19859745	73692	exon_intron
miR2275-x	novel_circ_000936	58479	58496	-25.3	0.9068	UCGCCUCCUUUUCUUUGA	|x||||||||||||||||	AUCGGAGGAAAAGAAACU	Bra010149	A06	+	19785936	19859745	73692	exon_intron
miR2275-x	novel_circ_000936	64421	64438	-25.3	0.9068	UCGCCUCCUUUUCUUUGG	|x|||||||||||||||o	AUCGGAGGAAAAGAAACU	Bra010149	A06	+	19785936	19859745	73692	exon_intron
miR3437-y	novel_circ_000936	59897	59915	-19.5	0.7303	UAGUCGCCUACAACGAAAA	|||o|o|||||||xo||||	AUCGGUGGAUGUUAUUUUU	Bra010149	A06	+	19785936	19859745	73692	exon_intron
miR3437-y	novel_circ_000936	68977	68995	-19.5	0.7303	UAGUCGCCUACAACGAAAA	|||o|o|||||||xo||||	AUCGGUGGAUGUUAUUUUU	Bra010149	A06	+	19785936	19859745	73692	exon_intron
miR4405-y	novel_circ_000936	56450	56467	-26.4	0.9263	UUGUUGGUUGAAUCUUGA	|||||||o||||||||||	AACAACCGACUUAGAACU	Bra010149	A06	+	19785936	19859745	73692	exon_intron
miR6300-y	novel_circ_000936	1277	1294	-21.5	0.6287	CCCCGACGUCAUACAACC	|x|||||o|||||xx|||	GUGGCUGUAGUAUAGUGG	Bra010149	A06	+	19785936	19859745	73692	exon_intron
miR8022-x	novel_circ_000936	57063	57081	-22.8	0.9913	GAGUUUACUCUUGAAACUC	o|o|||||||||||||||x	UUUAAAUGAGAACUUUGAA	Bra010149	A06	+	19785936	19859745	73692	exon_intron
novel-m0508-3p	novel_circ_000936	58525	58545	-52.1	1	CGCUGGGGUCCAGUCCGCCCU	|||||||||||||||||||||	GCGACCCCAGGUCAGGCGGGA	Bra010149	A06	+	19785936	19859745	73692	exon_intron
novel-m0516-3p	novel_circ_000936	56778	56799	-29.9	0.6765	UGCCAACCAUCUCGGACUGUGG	|||||||||||x|xo|||||x|	ACGGUUGGUAGCGGUUGACAGC	Bra010149	A06	+	19785936	19859745	73692	exon_intron
novel-m0657-3p	novel_circ_000936	56778	56799	-29.9	0.6765	UGCCAACCAUCUCGGACUGUGG	|||||||||||x|xo|||||x|	ACGGUUGGUAGCGGUUGACAGC	Bra010149	A06	+	19785936	19859745	73692	exon_intron
novel-m0733-5p	novel_circ_000936	23073	23094	-44.3	1	AACCGUCAAUCGGGAGAGAUCG	||||||||||||||||||||||	UUGGCAGUUAGCCCUCUCUAGC	Bra010149	A06	+	19785936	19859745	73692	exon_intron
miR4995-x	novel_circ_000937	72831	72849	-25.8	0.6632	CCGUCUCUGAACCACUUCU	|||||x|o||||||x|||o	GGCAGUGGCUUGGUUAAGG	Bra010149	A06	-	19785936	19859745	73810	antisense
miR10516-x	novel_circ_000938	55256	55274	-26.5	0.726	UAGGAAACGUCUGCUGAAU	|||||x|||||||||||x|	AUCCUCUGCAGACGACUGA	Bra010149	A06	+	19785936	19860144	74091	exon_intron
miR2275-x	novel_circ_000938	58479	58496	-25.3	0.9068	UCGCCUCCUUUUCUUUGA	|x||||||||||||||||	AUCGGAGGAAAAGAAACU	Bra010149	A06	+	19785936	19860144	74091	exon_intron
miR2275-x	novel_circ_000938	64421	64438	-25.3	0.9068	UCGCCUCCUUUUCUUUGG	|x|||||||||||||||o	AUCGGAGGAAAAGAAACU	Bra010149	A06	+	19785936	19860144	74091	exon_intron
miR3437-y	novel_circ_000938	59897	59915	-19.5	0.7303	UAGUCGCCUACAACGAAAA	|||o|o|||||||xo||||	AUCGGUGGAUGUUAUUUUU	Bra010149	A06	+	19785936	19860144	74091	exon_intron
miR3437-y	novel_circ_000938	68977	68995	-19.5	0.7303	UAGUCGCCUACAACGAAAA	|||o|o|||||||xo||||	AUCGGUGGAUGUUAUUUUU	Bra010149	A06	+	19785936	19860144	74091	exon_intron
miR4405-y	novel_circ_000938	56450	56467	-26.4	0.9263	UUGUUGGUUGAAUCUUGA	|||||||o||||||||||	AACAACCGACUUAGAACU	Bra010149	A06	+	19785936	19860144	74091	exon_intron
miR6300-y	novel_circ_000938	1277	1294	-21.5	0.6287	CCCCGACGUCAUACAACC	|x|||||o|||||xx|||	GUGGCUGUAGUAUAGUGG	Bra010149	A06	+	19785936	19860144	74091	exon_intron
miR8022-x	novel_circ_000938	57063	57081	-22.8	0.9913	GAGUUUACUCUUGAAACUC	o|o|||||||||||||||x	UUUAAAUGAGAACUUUGAA	Bra010149	A06	+	19785936	19860144	74091	exon_intron
novel-m0508-3p	novel_circ_000938	58525	58545	-52.1	1	CGCUGGGGUCCAGUCCGCCCU	|||||||||||||||||||||	GCGACCCCAGGUCAGGCGGGA	Bra010149	A06	+	19785936	19860144	74091	exon_intron
novel-m0516-3p	novel_circ_000938	56778	56799	-29.9	0.6765	UGCCAACCAUCUCGGACUGUGG	|||||||||||x|xo|||||x|	ACGGUUGGUAGCGGUUGACAGC	Bra010149	A06	+	19785936	19860144	74091	exon_intron
novel-m0657-3p	novel_circ_000938	56778	56799	-29.9	0.6765	UGCCAACCAUCUCGGACUGUGG	|||||||||||x|xo|||||x|	ACGGUUGGUAGCGGUUGACAGC	Bra010149	A06	+	19785936	19860144	74091	exon_intron
novel-m0733-5p	novel_circ_000938	23073	23094	-44.3	1	AACCGUCAAUCGGGAGAGAUCG	||||||||||||||||||||||	UUGGCAGUUAGCCCUCUCUAGC	Bra010149	A06	+	19785936	19860144	74091	exon_intron
miR10516-x	novel_circ_000939	55254	55272	-26.5	0.726	UAGGAAACGUCUGCUGAAU	|||||x|||||||||||x|	AUCCUCUGCAGACGACUGA	Bra010149	A06	+	19785938	19848263	62208	exon_intron
miR2275-x	novel_circ_000939	58477	58494	-25.3	0.9068	UCGCCUCCUUUUCUUUGA	|x||||||||||||||||	AUCGGAGGAAAAGAAACU	Bra010149	A06	+	19785938	19848263	62208	exon_intron
miR3437-y	novel_circ_000939	59895	59913	-19.5	0.7303	UAGUCGCCUACAACGAAAA	|||o|o|||||||xo||||	AUCGGUGGAUGUUAUUUUU	Bra010149	A06	+	19785938	19848263	62208	exon_intron
miR4405-y	novel_circ_000939	56448	56465	-26.4	0.9263	UUGUUGGUUGAAUCUUGA	|||||||o||||||||||	AACAACCGACUUAGAACU	Bra010149	A06	+	19785938	19848263	62208	exon_intron
miR6300-y	novel_circ_000939	1275	1292	-21.5	0.6287	CCCCGACGUCAUACAACC	|x|||||o|||||xx|||	GUGGCUGUAGUAUAGUGG	Bra010149	A06	+	19785938	19848263	62208	exon_intron
miR8022-x	novel_circ_000939	57061	57079	-22.8	0.9913	GAGUUUACUCUUGAAACUC	o|o|||||||||||||||x	UUUAAAUGAGAACUUUGAA	Bra010149	A06	+	19785938	19848263	62208	exon_intron
novel-m0508-3p	novel_circ_000939	58523	58543	-52.1	1	CGCUGGGGUCCAGUCCGCCCU	|||||||||||||||||||||	GCGACCCCAGGUCAGGCGGGA	Bra010149	A06	+	19785938	19848263	62208	exon_intron
novel-m0516-3p	novel_circ_000939	56776	56797	-29.9	0.6765	UGCCAACCAUCUCGGACUGUGG	|||||||||||x|xo|||||x|	ACGGUUGGUAGCGGUUGACAGC	Bra010149	A06	+	19785938	19848263	62208	exon_intron
novel-m0657-3p	novel_circ_000939	56776	56797	-29.9	0.6765	UGCCAACCAUCUCGGACUGUGG	|||||||||||x|xo|||||x|	ACGGUUGGUAGCGGUUGACAGC	Bra010149	A06	+	19785938	19848263	62208	exon_intron
novel-m0733-5p	novel_circ_000939	23071	23092	-44.3	1	AACCGUCAAUCGGGAGAGAUCG	||||||||||||||||||||||	UUGGCAGUUAGCCCUCUCUAGC	Bra010149	A06	+	19785938	19848263	62208	exon_intron
miR4995-x	novel_circ_000940	6231	6249	-25.8	0.6632	CCGUCUCUGAACCACUUCU	|||||x|o||||||x|||o	GGCAGUGGCUUGGUUAAGG	NA	A06	-	19785944	19793145	7202	intergenic
miR10516-x	novel_circ_000941	55243	55261	-26.5	0.726	UAGGAAACGUCUGCUGAAU	|||||x|||||||||||x|	AUCCUCUGCAGACGACUGA	Bra010149	A06	+	19785949	19848222	62156	exon_intron
miR2275-x	novel_circ_000941	58466	58483	-25.3	0.9068	UCGCCUCCUUUUCUUUGA	|x||||||||||||||||	AUCGGAGGAAAAGAAACU	Bra010149	A06	+	19785949	19848222	62156	exon_intron
miR3437-y	novel_circ_000941	59884	59902	-19.5	0.7303	UAGUCGCCUACAACGAAAA	|||o|o|||||||xo||||	AUCGGUGGAUGUUAUUUUU	Bra010149	A06	+	19785949	19848222	62156	exon_intron
miR4405-y	novel_circ_000941	56437	56454	-26.4	0.9263	UUGUUGGUUGAAUCUUGA	|||||||o||||||||||	AACAACCGACUUAGAACU	Bra010149	A06	+	19785949	19848222	62156	exon_intron
miR6300-y	novel_circ_000941	1264	1281	-21.5	0.6287	CCCCGACGUCAUACAACC	|x|||||o|||||xx|||	GUGGCUGUAGUAUAGUGG	Bra010149	A06	+	19785949	19848222	62156	exon_intron
miR8022-x	novel_circ_000941	57050	57068	-22.8	0.9913	GAGUUUACUCUUGAAACUC	o|o|||||||||||||||x	UUUAAAUGAGAACUUUGAA	Bra010149	A06	+	19785949	19848222	62156	exon_intron
novel-m0508-3p	novel_circ_000941	58512	58532	-52.1	1	CGCUGGGGUCCAGUCCGCCCU	|||||||||||||||||||||	GCGACCCCAGGUCAGGCGGGA	Bra010149	A06	+	19785949	19848222	62156	exon_intron
novel-m0516-3p	novel_circ_000941	56765	56786	-29.9	0.6765	UGCCAACCAUCUCGGACUGUGG	|||||||||||x|xo|||||x|	ACGGUUGGUAGCGGUUGACAGC	Bra010149	A06	+	19785949	19848222	62156	exon_intron
novel-m0657-3p	novel_circ_000941	56765	56786	-29.9	0.6765	UGCCAACCAUCUCGGACUGUGG	|||||||||||x|xo|||||x|	ACGGUUGGUAGCGGUUGACAGC	Bra010149	A06	+	19785949	19848222	62156	exon_intron
novel-m0733-5p	novel_circ_000941	23060	23081	-44.3	1	AACCGUCAAUCGGGAGAGAUCG	||||||||||||||||||||||	UUGGCAGUUAGCCCUCUCUAGC	Bra010149	A06	+	19785949	19848222	62156	exon_intron
miR10516-x	novel_circ_000942	55243	55261	-26.5	0.726	UAGGAAACGUCUGCUGAAU	|||||x|||||||||||x|	AUCCUCUGCAGACGACUGA	Bra010149	A06	+	19785949	19857250	71184	exon_intron
miR2275-x	novel_circ_000942	58466	58483	-25.3	0.9068	UCGCCUCCUUUUCUUUGA	|x||||||||||||||||	AUCGGAGGAAAAGAAACU	Bra010149	A06	+	19785949	19857250	71184	exon_intron
miR2275-x	novel_circ_000942	64408	64425	-25.3	0.9068	UCGCCUCCUUUUCUUUGG	|x|||||||||||||||o	AUCGGAGGAAAAGAAACU	Bra010149	A06	+	19785949	19857250	71184	exon_intron
miR3437-y	novel_circ_000942	59884	59902	-19.5	0.7303	UAGUCGCCUACAACGAAAA	|||o|o|||||||xo||||	AUCGGUGGAUGUUAUUUUU	Bra010149	A06	+	19785949	19857250	71184	exon_intron
miR3437-y	novel_circ_000942	68964	68982	-19.5	0.7303	UAGUCGCCUACAACGAAAA	|||o|o|||||||xo||||	AUCGGUGGAUGUUAUUUUU	Bra010149	A06	+	19785949	19857250	71184	exon_intron
miR4405-y	novel_circ_000942	56437	56454	-26.4	0.9263	UUGUUGGUUGAAUCUUGA	|||||||o||||||||||	AACAACCGACUUAGAACU	Bra010149	A06	+	19785949	19857250	71184	exon_intron
miR6300-y	novel_circ_000942	1264	1281	-21.5	0.6287	CCCCGACGUCAUACAACC	|x|||||o|||||xx|||	GUGGCUGUAGUAUAGUGG	Bra010149	A06	+	19785949	19857250	71184	exon_intron
miR8022-x	novel_circ_000942	57050	57068	-22.8	0.9913	GAGUUUACUCUUGAAACUC	o|o|||||||||||||||x	UUUAAAUGAGAACUUUGAA	Bra010149	A06	+	19785949	19857250	71184	exon_intron
novel-m0508-3p	novel_circ_000942	58512	58532	-52.1	1	CGCUGGGGUCCAGUCCGCCCU	|||||||||||||||||||||	GCGACCCCAGGUCAGGCGGGA	Bra010149	A06	+	19785949	19857250	71184	exon_intron
novel-m0516-3p	novel_circ_000942	56765	56786	-29.9	0.6765	UGCCAACCAUCUCGGACUGUGG	|||||||||||x|xo|||||x|	ACGGUUGGUAGCGGUUGACAGC	Bra010149	A06	+	19785949	19857250	71184	exon_intron
novel-m0657-3p	novel_circ_000942	56765	56786	-29.9	0.6765	UGCCAACCAUCUCGGACUGUGG	|||||||||||x|xo|||||x|	ACGGUUGGUAGCGGUUGACAGC	Bra010149	A06	+	19785949	19857250	71184	exon_intron
novel-m0733-5p	novel_circ_000942	23060	23081	-44.3	1	AACCGUCAAUCGGGAGAGAUCG	||||||||||||||||||||||	UUGGCAGUUAGCCCUCUCUAGC	Bra010149	A06	+	19785949	19857250	71184	exon_intron
bra-miR319-5p	novel_circ_000946	23726	23746	-24.7	0.6432	UCUCGAAGGAACCCUGGAAGG	||||||||||||x|x||x|o|	AGAGCUUCCUUGAGUCCAUUC	NA	A06	+	19899138	19933196	34059	intergenic
miR10516-x	novel_circ_000946	5336	5354	-26.5	0.726	UAGGAAACGUCUGCUGAAU	|||||x|||||||||||x|	AUCCUCUGCAGACGACUGA	NA	A06	+	19899138	19933196	34059	intergenic
miR10516-x	novel_circ_000946	17556	17574	-26.5	0.726	UAGGAAACGUCUGCUGAAU	|||||x|||||||||||x|	AUCCUCUGCAGACGACUGA	NA	A06	+	19899138	19933196	34059	intergenic
miR10516-x	novel_circ_000946	30444	30462	-26.5	0.726	UAGGAAACGUCUGCUGAAU	|||||x|||||||||||x|	AUCCUCUGCAGACGACUGA	NA	A06	+	19899138	19933196	34059	intergenic
miR2275-x	novel_circ_000946	33708	33725	-25.3	0.9068	UCGCCUCCUUUUCUUUGA	|x||||||||||||||||	AUCGGAGGAAAAGAAACU	NA	A06	+	19899138	19933196	34059	intergenic
miR3437-y	novel_circ_000946	1411	1429	-19.5	0.7303	UAGUCGCCUACAACGAAAA	|||o|o|||||||xo||||	AUCGGUGGAUGUUAUUUUU	NA	A06	+	19899138	19933196	34059	intergenic
miR4405-y	novel_circ_000946	6476	6493	-19.9	0.7133	UUGUCAGCUGAGUCUUGA	||||xx|||||o||||||	AACAACCGACUUAGAACU	NA	A06	+	19899138	19933196	34059	intergenic
miR4405-y	novel_circ_000946	18749	18766	-21.6	0.7742	UUGUCGGUUGAGUCUUGA	||||x||o|||o||||||	AACAACCGACUUAGAACU	NA	A06	+	19899138	19933196	34059	intergenic
miR4405-y	novel_circ_000946	31637	31654	-21.6	0.7742	UUGUCGGUUGAGUCUUGA	||||x||o|||o||||||	AACAACCGACUUAGAACU	NA	A06	+	19899138	19933196	34059	intergenic
miR529-x	novel_circ_000946	18824	18841	-36.7	0.8929	CGCUCUCGCCUGGCGGAG	|||||||x||||||||||	GCGAGAGAGGACCGCCUC	NA	A06	+	19899138	19933196	34059	intergenic
miR529-x	novel_circ_000946	31712	31729	-36.7	0.8929	CGCUCUCGCCUGGCGGAG	|||||||x||||||||||	GCGAGAGAGGACCGCCUC	NA	A06	+	19899138	19933196	34059	intergenic
miR8022-x	novel_circ_000946	19375	19393	-23.1	1	AAGUUUACUCUUGAAACUU	||o||||||||||||||||	UUUAAAUGAGAACUUUGAA	NA	A06	+	19899138	19933196	34059	intergenic
miR8022-x	novel_circ_000946	32290	32308	-23.1	1	AAGUUUACUCUUGAAACUU	||o||||||||||||||||	UUUAAAUGAGAACUUUGAA	NA	A06	+	19899138	19933196	34059	intergenic
novel-m0508-3p	novel_circ_000946	33754	33774	-52.1	1	CGCUGGGGUCCAGUCCGCCCU	|||||||||||||||||||||	GCGACCCCAGGUCAGGCGGGA	NA	A06	+	19899138	19933196	34059	intergenic
novel-m0915-5p	novel_circ_000946	8603	8623	-27.1	0.7113	UCACCCCCUCUGAACAUCGUA	|||||||||||x|||||x|ox	AGUGGGGGAGAAUUGUAACGA	NA	A06	+	19899138	19933196	34059	intergenic
novel-m0981-5p	novel_circ_000946	8603	8623	-27.1	0.7113	UCACCCCCUCUGAACAUCGUA	|||||||||||x|||||x|ox	AGUGGGGGAGAAUUGUAACGA	NA	A06	+	19899138	19933196	34059	intergenic
miR5149-y	novel_circ_000947	14052	14069	-23.1	0.7333	CUCGAUACUUCUAAACGG	|||||o|||||||||xxx	GAGCUGUGAAGAUUUAGG	Bra037449	A06	+	20127430	20142230	14581	exon_intron
miR5149-y	novel_circ_000948	14272	14289	-23.1	0.7333	CUCGAUACUUCUAAACGG	|||||o|||||||||xxx	GAGCUGUGAAGAUUUAGG	Bra037452	A06	+	20127430	20173766	46337	exon_intron
miR5149-y	novel_circ_000948	34732	34749	-23.3	0.7304	CUCGAUACUUCUAAAACA	|||||o|||||||||x|x	GAGCUGUGAAGAUUUAGG	Bra037452	A06	+	20127430	20173766	46337	exon_intron
miR5149-y	novel_circ_000948	45808	45825	-23.1	0.7333	CUCGAUACUUCUAAACGG	|||||o|||||||||xxx	GAGCUGUGAAGAUUUAGG	Bra037452	A06	+	20127430	20173766	46337	exon_intron
miR5149-y	novel_circ_000949	13762	13779	-23.1	0.7333	CUCGAUACUUCUAAACGG	|||||o|||||||||xxx	GAGCUGUGAAGAUUUAGG	Bra037452	A06	+	20127940	20163277	35338	exon_intron
miR5149-y	novel_circ_000949	34222	34239	-23.3	0.7304	CUCGAUACUUCUAAAACA	|||||o|||||||||x|x	GAGCUGUGAAGAUUUAGG	Bra037452	A06	+	20127940	20163277	35338	exon_intron
novel-m0158-3p	novel_circ_000950	13223	13245	-31.6	0.8681	AACGCGCCCUACUUGUAAUAUAU	|||||||x|||||||||||||||	UUGCGCGAGAUGAACAUUAUAUA	Bra037451	A06	-	20127940	20163277	34674	exon_intron
novel-m0510-3p	novel_circ_000950	6652	6673	-27.9	0.8638	UAUAUAAAUCUACCUGGUUGAA	||||||||||||||||o|||x|	AUAUAUUUAGAUGGACUAACCU	Bra037451	A06	-	20127940	20163277	34674	exon_intron
novel-m0584-5p	novel_circ_000950	13223	13245	-36.6	1	AACGCGCCCUACUUGUAAUAUAU	||||||||||||||o||||||||	UUGCGCGGGAUGAAUAUUAUAUA	Bra037451	A06	-	20127940	20163277	34674	exon_intron
novel-m0693-3p	novel_circ_000950	13223	13245	-36.6	1	AACGCGCCCUACUUGUAAUAUAU	||||||||||||||o||||||||	UUGCGCGGGAUGAAUAUUAUAUA	Bra037451	A06	-	20127940	20163277	34674	exon_intron
novel-m0738-3p	novel_circ_000950	13223	13245	-26.2	0.7572	AACGCGCCCUACUUGUAAUAUAU	||||x|||x||||||||||||||	UUGCACGGAAUGAACAUUAUAUA	Bra037451	A06	-	20127940	20163277	34674	exon_intron
miR5149-y	novel_circ_000953	10367	10384	-23.1	0.7333	CUCGAUACUUCUAAACGG	|||||o|||||||||xxx	GAGCUGUGAAGAUUUAGG	Bra037449	A06	+	20131115	20146359	15025	exon_intron
miR5149-y	novel_circ_000954	10367	10384	-23.1	0.7333	CUCGAUACUUCUAAACGG	|||||o|||||||||xxx	GAGCUGUGAAGAUUUAGG	Bra037449	A06	+	20131115	20146535	15201	exon_intron
miR5149-y	novel_circ_000956	9946	9963	-23.1	0.7333	CUCGAUACUUCUAAACGG	|||||o|||||||||xxx	GAGCUGUGAAGAUUUAGG	Bra037449	A06	+	20131536	20146249	14494	exon_intron
miR5149-y	novel_circ_000958	9946	9963	-23.1	0.7333	CUCGAUACUUCUAAACGG	|||||o|||||||||xxx	GAGCUGUGAAGAUUUAGG	Bra037449	A06	+	20131536	20146425	14670	exon_intron
miR5149-y	novel_circ_000959	9887	9904	-23.1	0.7333	CUCGAUACUUCUAAACGG	|||||o|||||||||xxx	GAGCUGUGAAGAUUUAGG	Bra037449	A06	+	20131595	20146290	14476	exon_intron
miR5149-y	novel_circ_000961	9887	9904	-23.1	0.7333	CUCGAUACUUCUAAACGG	|||||o|||||||||xxx	GAGCUGUGAAGAUUUAGG	Bra037449	A06	+	20131595	20146466	14652	exon_intron
miR5149-y	novel_circ_000962	9887	9904	-23.1	0.7333	CUCGAUACUUCUAAACGG	|||||o|||||||||xxx	GAGCUGUGAAGAUUUAGG	Bra037449	A06	+	20131595	20146642	14828	exon_intron
miR5149-y	novel_circ_000964	9884	9901	-23.1	0.7333	CUCGAUACUUCUAAACGG	|||||o|||||||||xxx	GAGCUGUGAAGAUUUAGG	Bra037449	A06	+	20131598	20146310	14493	exon_intron
miR5149-y	novel_circ_000965	9884	9901	-23.1	0.7333	CUCGAUACUUCUAAACGG	|||||o|||||||||xxx	GAGCUGUGAAGAUUUAGG	Bra037449	A06	+	20131598	20146486	14669	exon_intron
miR5149-y	novel_circ_000966	9525	9542	-23.1	0.7333	CUCGAUACUUCUAAACGG	|||||o|||||||||xxx	GAGCUGUGAAGAUUUAGG	Bra037449	A06	+	20131957	20146310	14134	exon_intron
miR5149-y	novel_circ_000967	9525	9542	-23.1	0.7333	CUCGAUACUUCUAAACGG	|||||o|||||||||xxx	GAGCUGUGAAGAUUUAGG	Bra037449	A06	+	20131957	20146486	14310	exon_intron
miR5149-y	novel_circ_000968	9525	9542	-23.1	0.7333	CUCGAUACUUCUAAACGG	|||||o|||||||||xxx	GAGCUGUGAAGAUUUAGG	Bra037449	A06	+	20131957	20146662	14486	exon_intron
novel-m0158-3p	novel_circ_000972	13903	13925	-31.6	0.8681	AACGCGCCCUACUUGUAAUAUAU	|||||||x|||||||||||||||	UUGCGCGAGAUGAACAUUAUAUA	Bra037451	A06	-	20132279	20163957	31015	exon_intron
novel-m0510-3p	novel_circ_000972	7332	7353	-27.9	0.8638	UAUAUAAAUCUACCUGGUUGAA	||||||||||||||||o|||x|	AUAUAUUUAGAUGGACUAACCU	Bra037451	A06	-	20132279	20163957	31015	exon_intron
novel-m0584-5p	novel_circ_000972	13903	13925	-36.6	1	AACGCGCCCUACUUGUAAUAUAU	||||||||||||||o||||||||	UUGCGCGGGAUGAAUAUUAUAUA	Bra037451	A06	-	20132279	20163957	31015	exon_intron
novel-m0693-3p	novel_circ_000972	13903	13925	-36.6	1	AACGCGCCCUACUUGUAAUAUAU	||||||||||||||o||||||||	UUGCGCGGGAUGAAUAUUAUAUA	Bra037451	A06	-	20132279	20163957	31015	exon_intron
novel-m0738-3p	novel_circ_000972	13903	13925	-26.2	0.7572	AACGCGCCCUACUUGUAAUAUAU	||||x|||x||||||||||||||	UUGCACGGAAUGAACAUUAUAUA	Bra037451	A06	-	20132279	20163957	31015	exon_intron
miR5656-y	novel_circ_000979	7297	7314	-21.3	0.6474	UUACUUCACCUCUGACUU	|o||||||x|||||||oo	AGUGAAGUAGAGACUGGG	Bra025331	A06	+	21047447	21057776	9385	exon_intron
miR5658-x	novel_circ_000979	199	218	-21	0.6667	CUAGUUCUCCUAUUGCUACU	|||o|x||x|||o|||||||	GAUUAUGAUGAUGACGAUGA	Bra025331	A06	+	21047447	21057776	9385	exon_intron
miR8594-x	novel_circ_000979	4753	4770	-17.5	0.6481	UACUUAUACUCUUCUUCU	|||o||||||||||x|x|	AUGGAUAUGAGAAGCAAA	Bra025331	A06	+	21047447	21057776	9385	exon_intron
novel-m0399-3p	novel_circ_000979	6022	6042	-24.9	0.7685	UAGAUCCCAAAUCCACAAUCG	||o|||||||||||xx||||x	AUUUAGGGUUUAGGGAUUAGA	Bra025331	A06	+	21047447	21057776	9385	exon_intron
novel-m0805-5p	novel_circ_000979	9303	9323	-23.6	0.7108	UAGUUAGAAUACGAAGGGGUU	|||xo|o||||||||||x|||	AUCUGUUUUAUGCUUCCGCAA	Bra025331	A06	+	21047447	21057776	9385	exon_intron
novel-m0812-3p	novel_circ_000979	6022	6042	-24.9	0.7685	UAGAUCCCAAAUCCACAAUCG	||o|||||||||||xx||||x	AUUUAGGGUUUAGGGAUUAGA	Bra025331	A06	+	21047447	21057776	9385	exon_intron
novel-m0584-5p	novel_circ_000999	931	953	-24.7	0.6804	AAAACGCCCUACUUACAAUAUAU	||xx|||||||||||x|||||||	UUGCGCGGGAUGAAUAUUAUAUA	NA	A06	-	22961355	22962406	1052	intergenic
novel-m0693-3p	novel_circ_000999	931	953	-24.7	0.6804	AAAACGCCCUACUUACAAUAUAU	||xx|||||||||||x|||||||	UUGCGCGGGAUGAAUAUUAUAUA	NA	A06	-	22961355	22962406	1052	intergenic
miR3511-x	novel_circ_001012	3335	3352	-20.4	0.6962	UACCAGUACUUACUUCUU	|x||x|||||||||||||	AAGGCCAUGAAUGAAGAA	Bra033742	A06	-	24248759	24254708	5950	antisense
miR2275-x	novel_circ_001019	3421	3438	-19.8	0.6947	UAGCCUUCUUUUCGUGGA	||||||o||||||x|x||	AUCGGAGGAAAAGAAACU	Bra039009	A07	-	661033	665142	3527	exon_intron
miR5021-x	novel_circ_001025	37	54	-18	0.602	CUCUUCGGCUUCUCUUAG	||||||x||||||xo|x|	GAGAAGACGAAGAAGAAC	NA	A07	-	2264460	2265200	741	intergenic
miR5021-x	novel_circ_001040	126	143	-19	0.6355	UUCCUCUGCUUCUACUUU	o||x|||||||||x|||x	GAGAAGACGAAGAAGAAC	Bra015102	A07	+	5690607	5690786	180	antisense
miR5658-x	novel_circ_001040	92	111	-21.7	0.6718	CUGCUACUACUUCUGCUUCU	||ox|||||||x|||||x||	GAUUAUGAUGAUGACGAUGA	Bra015102	A07	+	5690607	5690786	180	antisense
miR5021-x	novel_circ_001044	167	184	-18.7	0.6213	UCCUUCUUCUUCUUCUUC	ox|||||x|||||||||x	GAGAAGACGAAGAAGAAC	Bra015013	A07	+	6503601	6503889	289	antisense
miR5021-x	novel_circ_001046	7104	7121	-19.2	0.6337	UUCUUCUUCUUUUUCUUG	o||||||x|||o||||||	GAGAAGACGAAGAAGAAC	Bra030169	A07	-	8197970	8206808	8839	antisense
novel-m0687-5p	novel_circ_001048	3685	3705	-29.4	0.8802	ACCUAUACUACUUUUCCGUAU	||||||||||||||x||||||	UGGAUAUGAUGAAAUGGCAUA	Bra030141	A07	-	8465621	8471486	5782	exon_intron
miR5293-x	novel_circ_001049	5161	5180	-28.2	0.7989	UUUCUUCCGUUCCUUCUUCU	||ox|o||||||||||||||	AAGAAGGGCAAGGAAGAAGA	Bra030140	A07	+	8465621	8471486	5866	exon_intron
miR7772-x	novel_circ_001060	56	73	-32	0.8672	AGCGCGAGGCACCUCUGG	|o|||x|||||||||||x	UUGCGGUCCGUGGAGACA	Bra012418	A07	-	10017441	10017649	209	antisense
miR5043-x	novel_circ_001061	5040	5057	-29	0.7073	AGGGGGAGGAGUCGAAGU	xo||||||||||||xx||	GUCCCCUCCUCAGCACCA	Bra012389	A07	-	10277010	10283093	5920	exon_intron
miR9410-x	novel_circ_001061	3221	3241	-22.3	0.7057	GACUUUACAUUCAGCAGACCC	|||||x|x|||||||||||xx	CUGAAUUAUAAGUCGUCUGUA	Bra012389	A07	-	10277010	10283093	5920	exon_intron
miR9410-x	novel_circ_001061	3354	3374	-31	0.9748	GACUUAAUAUUCAGCAGACAC	||||||||||||||||||||x	CUGAAUUAUAAGUCGUCUGUA	Bra012389	A07	-	10277010	10283093	5920	exon_intron
miR9410-x	novel_circ_001061	3579	3599	-31.8	1	GACUUAAUAUUCAGCAGACAU	|||||||||||||||||||||	CUGAAUUAUAAGUCGUCUGUA	Bra012389	A07	-	10277010	10283093	5920	exon_intron
miR9410-x	novel_circ_001061	3804	3824	-31	0.9748	GACUUAAUAUUCAGCAGACAC	||||||||||||||||||||x	CUGAAUUAUAAGUCGUCUGUA	Bra012389	A07	-	10277010	10283093	5920	exon_intron
miR9410-x	novel_circ_001061	4029	4049	-31.8	1	GACUUAAUAUUCAGCAGACAU	|||||||||||||||||||||	CUGAAUUAUAAGUCGUCUGUA	Bra012389	A07	-	10277010	10283093	5920	exon_intron
miR3699-y	novel_circ_001068	2087	2104	-20.3	0.7546	AGAAGUCUUCUUUCUCGA	|oxx||||||||||||o|	UUGACAGAAGAAAGAGUU	Bra012223	A07	-	11442153	11454645	12015	exon_intron
miR8594-x	novel_circ_001087	539	556	-17.4	0.6468	UACCUAUACUCUCCCUCU	||||||||||||x|x|x|	AUGGAUAUGAGAAGCAAA	Bra003185	A07	+	15007901	15014820	6920	exon_intron
novel-m0417-5p	novel_circ_001087	3257	3276	-23.2	0.7205	CUUUUUAUCUCACUACUUGU	||o||||o||||x|||||||	GAGAAAUGGAGUAAUGAACA	Bra003185	A07	+	15007901	15014820	6920	exon_intron
novel-m0417-5p	novel_circ_001087	3387	3406	-23.2	0.7205	CUUUUUAUCUCACUACUUGU	||o||||o||||x|||||||	GAGAAAUGGAGUAAUGAACA	Bra003185	A07	+	15007901	15014820	6920	exon_intron
novel-m0750-5p	novel_circ_001087	3257	3276	-23.2	0.7205	CUUUUUAUCUCACUACUUGU	||o||||o||||x|||||||	GAGAAAUGGAGUAAUGAACA	Bra003185	A07	+	15007901	15014820	6920	exon_intron
novel-m0750-5p	novel_circ_001087	3387	3406	-23.2	0.7205	CUUUUUAUCUCACUACUUGU	||o||||o||||x|||||||	GAGAAAUGGAGUAAUGAACA	Bra003185	A07	+	15007901	15014820	6920	exon_intron
novel-m0868-5p	novel_circ_001087	3257	3276	-23.2	0.7205	CUUUUUAUCUCACUACUUGU	||o||||o||||x|||||||	GAGAAAUGGAGUAAUGAACA	Bra003185	A07	+	15007901	15014820	6920	exon_intron
novel-m0868-5p	novel_circ_001087	3387	3406	-23.2	0.7205	CUUUUUAUCUCACUACUUGU	||o||||o||||x|||||||	GAGAAAUGGAGUAAUGAACA	Bra003185	A07	+	15007901	15014820	6920	exon_intron
miR5021-x	novel_circ_001088	209	226	-18	0.602	UUCUUCUCCUUCUUCAUU	o||||||x|||||||x|x	GAGAAGACGAAGAAGAAC	Bra003194	A07	+	15071150	15071418	269	one_exon
miR1134-y	novel_circ_001105	2514	2532	-19.3	0.6498	UUCGUCUUCUUCUCCUUCU	|||||x|||||||x|||||	AAGCACAAGAAGAAGAAGA	Bra003770	A07	+	18271991	18274774	2695	exon_intron
miR6300-y	novel_circ_001105	1807	1824	-22.6	0.6686	CACCGACAUCACUUCUUC	|||||||||||xx||xo|	GUGGCUGUAGUAUAGUGG	Bra003770	A07	+	18271991	18274774	2695	exon_intron
miR5021-x	novel_circ_001132	165	182	-18.3	0.612	UCCUUCUUCUUCUUCCUG	ox|||||x|||||||x||	GAGAAGACGAAGAAGAAC	Bra015779	A07	+	24176837	24177042	206	antisense
bra-miR319-5p	novel_circ_001140	266	286	-25.3	0.6589	UUUCGAAGGAACUCGAGUCAG	|o||||||||||||ox||x||	AGAGCUUCCUUGAGUCCAUUC	Bra015727	A07	-	24430771	24431067	297	one_exon
miR1863-y	novel_circ_001149	543	566	-29.3	0.727	GACCGAGACUAUGGUAUACUCUAA	x|x|||||||||||||o|x|||||	AUCGCUCUGAUACCAUGUUAGAUU	Bra035041	A07	-	25208512	25213911	5400	antisense
miR1863-y	novel_circ_001150	1086	1109	-29.3	0.727	GACCGAGACUAUGGUAUACUCUAA	x|x|||||||||||||o|x|||||	AUCGCUCUGAUACCAUGUUAGAUU	Bra035041	A07	-	25208512	25214454	5943	antisense
miR5021-x	novel_circ_001151	2447	2464	-19.8	0.6471	UUCUUCUACUUCUUCUUC	o||||||x|||||||||x	GAGAAGACGAAGAAGAAC	Bra035041	A07	+	25210651	25213960	3310	intronic
miR1863-y	novel_circ_001152	592	615	-29.3	0.727	GACCGAGACUAUGGUAUACUCUAA	x|x|||||||||||||o|x|||||	AUCGCUCUGAUACCAUGUUAGAUU	Bra035041	A07	-	25210651	25213960	3310	antisense
miR1863-y	novel_circ_001153	1135	1158	-29.3	0.727	GACCGAGACUAUGGUAUACUCUAA	x|x|||||||||||||o|x|||||	AUCGCUCUGAUACCAUGUUAGAUU	Bra035041	A07	-	25210651	25214503	3853	antisense
miR5021-x	novel_circ_001154	2447	2464	-19.8	0.6471	UUCUUCUACUUCUUCUUC	o||||||x|||||||||x	GAGAAGACGAAGAAGAAC	Bra035041	A07	+	25210651	25214503	3853	intronic
novel-m0521-3p	novel_circ_001157	4934	4953	-33.6	0.7119	GCCUCUUCUUCCCCUGCCCU	|x|||o||o||||||x||||	CAGAGGAGGAGGGGAGGGGA	Bra030891	A08	+	580263	604874	24612	exon_intron
novel-m0521-3p	novel_circ_001157	17911	17930	-33.6	0.7119	GCCUCUUCUUCCCCUGCCCU	|x|||o||o||||||x||||	CAGAGGAGGAGGGGAGGGGA	Bra030891	A08	+	580263	604874	24612	exon_intron
miR5021-x	novel_circ_001164	1880	1897	-18.3	0.606	UUCUUCUUCUUCUUCGUA	o||||||x|||||||x|x	GAGAAGACGAAGAAGAAC	Bra014110	A08	-	3369157	3403298	33318	exon_intron
novel-m0300-5p	novel_circ_001164	5998	6018	-38.3	0.8928	UAUCCUGCCGAGUCCACUACG	||||||||||||x||||||||	AUAGGACGGCUCUGGUGAUGC	Bra014110	A08	-	3369157	3403298	33318	exon_intron
novel-m0417-5p	novel_circ_001164	1386	1405	-23.2	0.7205	CUUUUUAUCUCACUACUUGU	||o||||o||||x|||||||	GAGAAAUGGAGUAAUGAACA	Bra014110	A08	-	3369157	3403298	33318	exon_intron
novel-m0573-5p	novel_circ_001164	31986	32006	-25	0.7463	AGGUUAUAUACGAAGAUAUUA	||||||o|||||x||||||||	UCCAAUGUAUGCCUCUAUAAU	Bra014110	A08	-	3369157	3403298	33318	exon_intron
novel-m0636-3p	novel_circ_001164	28806	28825	-22.4	0.6588	UAUCUCUAUAUGUAAUCUCU	|||||||x|||||||o|||x	AUAGAGACAUACAUUGGAGC	Bra014110	A08	-	3369157	3403298	33318	exon_intron
novel-m0713-5p	novel_circ_001164	26623	26645	-26.4	0.6701	UAAGUAUACUUGCUGAUUUCUGC	||x|||o||||||||x||||||x	AUCCAUGUGAACGACGAAAGACA	Bra014110	A08	-	3369157	3403298	33318	exon_intron
novel-m0750-5p	novel_circ_001164	1386	1405	-23.2	0.7205	CUUUUUAUCUCACUACUUGU	||o||||o||||x|||||||	GAGAAAUGGAGUAAUGAACA	Bra014110	A08	-	3369157	3403298	33318	exon_intron
novel-m0808-5p	novel_circ_001164	25519	25539	-35.2	0.9003	UUCUCUCAGGUGACACUCCAG	||||||x||||||||||||||	AAGAGAAUCCACUGUGAGGUC	Bra014110	A08	-	3369157	3403298	33318	exon_intron
novel-m0868-5p	novel_circ_001164	1386	1405	-23.2	0.7205	CUUUUUAUCUCACUACUUGU	||o||||o||||x|||||||	GAGAAAUGGAGUAAUGAACA	Bra014110	A08	-	3369157	3403298	33318	exon_intron
novel-m0360-3p	novel_circ_001167	8045	8065	-24.7	0.6804	GCGUCGCUGAAACUUUUCUUG	|||||||x|||xx||||||||	CGCAGCGUCUUGUAAAAGAAC	Bra013994	A08	+	4784879	4804479	19519	exon_intron
novel-m0536-3p	novel_circ_001167	8045	8065	-24.7	0.6804	GCGUCGCUGAAACUUUUCUUG	|||||||x|||xx||||||||	CGCAGCGUCUUGUAAAAGAAC	Bra013994	A08	+	4784879	4804479	19519	exon_intron
miR824-x	novel_circ_001174	586	604	-23.2	0.8169	AACUGGUAAACGUUCUUAA	|x|||||||||oo||||||	UAGACCAUUUGUGAGAAUU	NA	A08	-	8214779	8237644	22866	intergenic
miR824-x	novel_circ_001174	18090	18108	-23.2	0.8169	GACUGGUAAACGUUCUUAA	ox|||||||||oo||||||	UAGACCAUUUGUGAGAAUU	NA	A08	-	8214779	8237644	22866	intergenic
novel-m0026-5p	novel_circ_001174	1238	1259	-24.1	0.6227	AGUAACAAACUACUCACUCCGG	|x||||x|||||||||||x||o	UGAUUGGUUGAUGAGUGAUGCU	NA	A08	-	8214779	8237644	22866	intergenic
novel-m0026-5p	novel_circ_001174	18669	18690	-24	0.6218	AGUAACAAACUACUCACUCCGG	|x||||x|||||||||||x||o	UGAUUGGUUGAUGAGUGAUGCU	NA	A08	-	8214779	8237644	22866	intergenic
novel-m0047-5p	novel_circ_001174	209	230	-30.3	0.7445	AUAGUCCAUAAACUCAUGGUGU	|||o||||o||x||||o|||||	UAUUAGGUGUUGGAGUGCCACA	NA	A08	-	8214779	8237644	22866	intergenic
novel-m0047-5p	novel_circ_001174	12193	12214	-36.9	0.9066	AUAGUCCAUAACCUCAUGGUGU	|||o||||o|||||||o|||||	UAUUAGGUGUUGGAGUGCCACA	NA	A08	-	8214779	8237644	22866	intergenic
novel-m0047-5p	novel_circ_001174	17728	17749	-30.3	0.7445	AUAGUCCAUAAACUCAUGGUGU	|||o||||o||x||||o|||||	UAUUAGGUGUUGGAGUGCCACA	NA	A08	-	8214779	8237644	22866	intergenic
novel-m0312-5p	novel_circ_001174	209	230	-30.3	0.7445	AUAGUCCAUAAACUCAUGGUGU	|||o||||o||x||||o|||||	UAUUAGGUGUUGGAGUGCCACA	NA	A08	-	8214779	8237644	22866	intergenic
novel-m0312-5p	novel_circ_001174	12193	12214	-36.9	0.9066	AUAGUCCAUAACCUCAUGGUGU	|||o||||o|||||||o|||||	UAUUAGGUGUUGGAGUGCCACA	NA	A08	-	8214779	8237644	22866	intergenic
novel-m0312-5p	novel_circ_001174	17728	17749	-30.3	0.7445	AUAGUCCAUAAACUCAUGGUGU	|||o||||o||x||||o|||||	UAUUAGGUGUUGGAGUGCCACA	NA	A08	-	8214779	8237644	22866	intergenic
novel-m0316-3p	novel_circ_001174	49	69	-25.8	0.6232	UGGUCUCGCUGUCCCUCUUCA	|x|||||x|||||x||||||x	AGCAGAGAGACAGAGAGAAGC	NA	A08	-	8214779	8237644	22866	intergenic
novel-m0316-3p	novel_circ_001174	12033	12053	-25.8	0.6232	UGGUCUCGCUGUCCCUCUUCA	|x|||||x|||||x||||||x	AGCAGAGAGACAGAGAGAAGC	NA	A08	-	8214779	8237644	22866	intergenic
novel-m0353-3p	novel_circ_001174	209	230	-30.3	0.7445	AUAGUCCAUAAACUCAUGGUGU	|||o||||o||x||||o|||||	UAUUAGGUGUUGGAGUGCCACA	NA	A08	-	8214779	8237644	22866	intergenic
novel-m0353-3p	novel_circ_001174	12193	12214	-36.9	0.9066	AUAGUCCAUAACCUCAUGGUGU	|||o||||o|||||||o|||||	UAUUAGGUGUUGGAGUGCCACA	NA	A08	-	8214779	8237644	22866	intergenic
novel-m0353-3p	novel_circ_001174	17728	17749	-30.3	0.7445	AUAGUCCAUAAACUCAUGGUGU	|||o||||o||x||||o|||||	UAUUAGGUGUUGGAGUGCCACA	NA	A08	-	8214779	8237644	22866	intergenic
novel-m0540-5p	novel_circ_001174	209	230	-30.3	0.7445	AUAGUCCAUAAACUCAUGGUGU	|||o||||o||x||||o|||||	UAUUAGGUGUUGGAGUGCCACA	NA	A08	-	8214779	8237644	22866	intergenic
novel-m0540-5p	novel_circ_001174	12193	12214	-36.9	0.9066	AUAGUCCAUAACCUCAUGGUGU	|||o||||o|||||||o|||||	UAUUAGGUGUUGGAGUGCCACA	NA	A08	-	8214779	8237644	22866	intergenic
novel-m0540-5p	novel_circ_001174	17728	17749	-30.3	0.7445	AUAGUCCAUAAACUCAUGGUGU	|||o||||o||x||||o|||||	UAUUAGGUGUUGGAGUGCCACA	NA	A08	-	8214779	8237644	22866	intergenic
novel-m0917-5p	novel_circ_001174	209	230	-30.3	0.7445	AUAGUCCAUAAACUCAUGGUGU	|||o||||o||x||||o|||||	UAUUAGGUGUUGGAGUGCCACA	NA	A08	-	8214779	8237644	22866	intergenic
novel-m0917-5p	novel_circ_001174	12193	12214	-36.9	0.9066	AUAGUCCAUAACCUCAUGGUGU	|||o||||o|||||||o|||||	UAUUAGGUGUUGGAGUGCCACA	NA	A08	-	8214779	8237644	22866	intergenic
novel-m0917-5p	novel_circ_001174	17728	17749	-30.3	0.7445	AUAGUCCAUAAACUCAUGGUGU	|||o||||o||x||||o|||||	UAUUAGGUGUUGGAGUGCCACA	NA	A08	-	8214779	8237644	22866	intergenic
miR2275-x	novel_circ_001187	1869	1886	-19.7	0.7061	GACCCUCCUUUUCUUUCG	x|x|||||||||||||xo	AUCGGAGGAAAAGAAACU	Bra040085	A08	+	12264092	12267656	3565	antisense
miR1134-y	novel_circ_001192	1823	1841	-18.7	0.6192	UUCGUGUCAUUCUUCUGUU	|||||||xx|||||||xo|	AAGCACAAGAAGAAGAAGA	Bra010400	A08	-	13552042	13565170	13129	exon_intron
miR1134-y	novel_circ_001192	4777	4795	-19.8	0.6689	CUCGUCUUCUUCUUCUUUG	x||||x|||||||||||ox	AAGCACAAGAAGAAGAAGA	Bra010400	A08	-	13552042	13565170	13129	exon_intron
miR3511-x	novel_circ_001192	3042	3059	-19.5	0.6678	UACUUGUACUUACUUCUU	|x|ox|||||||||||||	AAGGCCAUGAAUGAAGAA	Bra010400	A08	-	13552042	13565170	13129	exon_intron
novel-m0713-5p	novel_circ_001192	9948	9970	-27.5	0.6944	UAGGUACACUUGAUGUUUUCUAC	||||||||||||x||o|||||xx	AUCCAUGUGAACGACGAAAGACA	Bra010400	A08	-	13552042	13565170	13129	exon_intron
novel-m0750-3p	novel_circ_001192	1983	2002	-28.3	0.7972	GAGUAGUGAGGUGAAGAGUG	o|||||||||||o|||x|||	UUCAUCACUCCAUUUCCCAC	Bra010400	A08	-	13552042	13565170	13129	exon_intron
novel-m0868-3p	novel_circ_001192	1983	2002	-28.3	0.7972	GAGUAGUGAGGUGAAGAGUG	o|||||||||||o|||x|||	UUCAUCACUCCAUUUCCCAC	Bra010400	A08	-	13552042	13565170	13129	exon_intron
miR8594-x	novel_circ_001206	80	97	-16.8	0.6245	UACGUAUACUCUUCCUUC	|||x||||||||||x||x	AUGGAUAUGAGAAGCAAA	Bra010585	A08	-	14555354	14556769	1416	exon_intron
novel-m0915-5p	novel_circ_001206	1283	1303	-37.5	0.9843	UCACCCCCUCUUAACAUUGCC	||||||||||||||||||||x	AGUGGGGGAGAAUUGUAACGA	Bra010585	A08	-	14555354	14556769	1416	exon_intron
novel-m0981-5p	novel_circ_001206	1283	1303	-37.5	0.9843	UCACCCCCUCUUAACAUUGCC	||||||||||||||||||||x	AGUGGGGGAGAAUUGUAACGA	Bra010585	A08	-	14555354	14556769	1416	exon_intron
miR5054-y	novel_circ_001211	95	112	-28	0.678	AGGGGUGUCAGGGGCUGG	|||||||||||xx||x|x	UCCCCACAGUCGGCGCCA	Bra010810	A08	+	15791602	15791786	185	antisense
miR5021-x	novel_circ_001213	6927	6944	-18.4	0.6154	UUCUUCUUCUUCUGCUAG	o||||||x|||||x||x|	GAGAAGACGAAGAAGAAC	Bra010817	A08	+	15826243	15833254	7012	exon_intron
miR824-x	novel_circ_001214	949	967	-20.2	0.7138	GUCUGGUAAACAAUCUCUA	o|||||||||||x|||xx|	UAGACCAUUUGUGAGAAUU	Bra010817	A08	-	15831256	15840603	9348	antisense
miR5021-x	novel_circ_001215	1343	1360	-18.4	0.6154	UUCUUCUUCUUCUGCUAG	o||||||x|||||x||x|	GAGAAGACGAAGAAGAAC	Bra010817	A08	+	15831827	15841012	3061	exon_intron
miR5658-x	novel_circ_001219	268	287	-28.5	0.8769	CUAAUUCUACUACUGCUACU	|||||x||||||||||||||	GAUUAUGAUGAUGACGAUGA	Bra010865	A08	-	16062373	16062935	326	exon_intron
miR5021-x	novel_circ_001241	538	555	-21.8	0.7148	UGCUUCUGCUUCUUCGAG	ox|||||||||||||xx|	GAGAAGACGAAGAAGAAC	Bra016669	A08	-	18727214	18727923	710	antisense
novel-m0036-3p	novel_circ_001258	3857	3877	-25.3	0.6487	AAACUAUACCUCAUCCCCACC	|xx||||||||||x|||x|||	UGAGAUAUGGAGUUGGGUUGG	Bra034241	A09	-	1428015	1434397	6383	exon_intron
miR1134-y	novel_circ_001264	64	82	-19.1	0.6453	UUCUUCUUCUUCUUCUCUU	|||x|x||||||||||xo|	AAGCACAAGAAGAAGAAGA	Bra036111	A09	-	2420696	2420941	246	antisense
miR5021-x	novel_circ_001264	65	82	-19.2	0.6337	UUCUUCUUCUUCUUCUCU	o||||||x||||||||xx	GAGAAGACGAAGAAGAAC	Bra036111	A09	-	2420696	2420941	246	antisense
miR5021-x	novel_circ_001264	134	151	-18.2	0.6087	UUCUUCAGUUUCUUCUUC	o|||||x|o||||||||x	GAGAAGACGAAGAAGAAC	Bra036111	A09	-	2420696	2420941	246	antisense
miR5021-x	novel_circ_001264	200	217	-19.8	0.6471	UUCUUCUUCUUCUUCUUC	o||||||x|||||||||x	GAGAAGACGAAGAAGAAC	Bra036111	A09	-	2420696	2420941	246	antisense
miR5656-y	novel_circ_001264	113	130	-21.2	0.6444	CGACUUCAUCUCGGACUC	xx||||||||||x|||o|	AGUGAAGUAGAGACUGGG	Bra036111	A09	-	2420696	2420941	246	antisense
miR5021-x	novel_circ_001282	4921	4938	-20.7	0.6832	CUCUUCUUUUUCUUCUUC	|||||||xo||||||||x	GAGAAGACGAAGAAGAAC	Bra027772	A09	-	6716433	6729306	7430	exon_intron
miR824-x	novel_circ_001282	284	302	-19.1	0.6678	CUCUGGUGAACUCUCCUAA	x||||||o|||x|||x|||	UAGACCAUUUGUGAGAAUU	Bra027772	A09	-	6716433	6729306	7430	exon_intron
miR825-x	novel_circ_001282	5148	5169	-34.1	0.7857	GGUUUGUGGUCGACCUUCUUCG	o|||o||||||||x||||||||	UCAAGCACCAGCUCGAAGAAGC	Bra027772	A09	-	6716433	6729306	7430	exon_intron
miR7772-x	novel_circ_001283	1660	1677	-23	0.6183	GACGCCAACCACCUCUAU	o||||||xx|||||||x|	UUGCGGUCCGUGGAGACA	Bra027772	A09	-	6716926	6721276	4351	intronic
miR1134-y	novel_circ_001289	6739	6757	-19	0.6441	UUCUUUUUCUUCUUUUUAU	|||x|x||||||||o||x|	AAGCACAAGAAGAAGAAGA	Bra027053	A09	+	8435384	8463931	27735	exon_intron
novel-m0713-5p	novel_circ_001289	15640	15662	-35	0.8838	UAGGUACACUUGUUGUUUUCUGC	||||||||||||o||o||||||x	AUCCAUGUGAACGACGAAAGACA	Bra027053	A09	+	8435384	8463931	27735	exon_intron
novel-m0808-5p	novel_circ_001289	14508	14528	-31.9	0.8201	CUCUCUGAGGUGACAUUCCAG	x|||||x||||||||o|||||	AAGAGAAUCCACUGUGAGGUC	Bra027053	A09	+	8435384	8463931	27735	exon_intron
miR5021-x	novel_circ_001295	204	221	-19.8	0.6622	UUCUUCUUCUUCUACAUG	o||||||x|||||x|x||	GAGAAGACGAAGAAGAAC	Bra027850	A09	-	9687294	9687557	264	antisense
novel-m0142-5p	novel_circ_001303	1500	1522	-37.8	0.9947	UGCCUCCCAUUGUAUACAAUUGC	||||||||||||||||||||||x	ACGGAGGGUAACAUAUGUUAACA	Bra027501	A09	+	11313391	11316628	3238	antisense
novel-m0135-3p	novel_circ_001306	12171	12191	-24.6	0.7961	AUCCUAAAUCCCAAAUCACAA	||x||||||||||||||xx||	UAUGAUUUAGGGUUUAGGAUU	Bra027553	A09	-	11731010	11747949	16763	exon_intron
novel-m0135-3p	novel_circ_001306	12192	12212	-25.4	0.822	AUUCUAAAUCCCAAAUCCCUA	||x|||||||||||||||xx|	UAUGAUUUAGGGUUUAGGAUU	Bra027553	A09	-	11731010	11747949	16763	exon_intron
novel-m0135-3p	novel_circ_001306	12213	12233	-25.4	0.822	AGCCUAAAUCCCAAAUCCUUA	|xx||||||||||||||||x|	UAUGAUUUAGGGUUUAGGAUU	Bra027553	A09	-	11731010	11747949	16763	exon_intron
novel-m0161-3p	novel_circ_001306	12219	12239	-23	0.7099	UCCCAAAGCCUAAAUCCCAAA	||x||||x|||||||||||||	AGAGUUUAGGAUUUAGGGUUU	Bra027553	A09	-	11731010	11747949	16763	exon_intron
novel-m0225-3p	novel_circ_001306	12219	12239	-23	0.7099	UCCCAAAGCCUAAAUCCCAAA	||x||||x|||||||||||||	AGAGUUUAGGAUUUAGGGUUU	Bra027553	A09	-	11731010	11747949	16763	exon_intron
novel-m0350-5p	novel_circ_001306	11965	11985	-23.7	0.7337	AUUUGGGUUCUUAAUGAGAAA	|o|||||||||||x||||x||	UGAACCCAAGAAUAACUCAUU	Bra027553	A09	-	11731010	11747949	16763	exon_intron
novel-m0392-3p	novel_circ_001306	12219	12239	-23	0.7099	UCCCAAAGCCUAAAUCCCAAA	||x||||x|||||||||||||	AGAGUUUAGGAUUUAGGGUUU	Bra027553	A09	-	11731010	11747949	16763	exon_intron
novel-m0399-3p	novel_circ_001306	12167	12187	-31.7	0.9784	UAAAUCCCAAAUCACAAAACG	|||||||||||||x|x||x|x	AUUUAGGGUUUAGGGAUUAGA	Bra027553	A09	-	11731010	11747949	16763	exon_intron
novel-m0399-3p	novel_circ_001306	12188	12208	-31.7	0.9814	UAAAUCCCAAAUCCCUAAUCC	||||||||||||||||||||x	AUUUAGGGUUUAGGGAUUAGA	Bra027553	A09	-	11731010	11747949	16763	exon_intron
novel-m0399-3p	novel_circ_001306	12209	12229	-31.7	0.9814	UAAAUCCCAAAUCCUUAAUUC	||||||||||||||o||||ox	AUUUAGGGUUUAGGGAUUAGA	Bra027553	A09	-	11731010	11747949	16763	exon_intron
novel-m0611-5p	novel_circ_001306	12219	12239	-23	0.7099	UCCCAAAGCCUAAAUCCCAAA	||x||||x|||||||||||||	AGAGUUUAGGAUUUAGGGUUU	Bra027553	A09	-	11731010	11747949	16763	exon_intron
novel-m0760-3p	novel_circ_001306	12171	12192	-26.8	0.8508	AAUCCUAAAUCCCAAAUCACAA	||||||||||||x|||||||||	UUAGGAUUUAGGAUUUAGUGUU	Bra027553	A09	-	11731010	11747949	16763	exon_intron
novel-m0812-3p	novel_circ_001306	12167	12187	-31.7	0.9784	UAAAUCCCAAAUCACAAAACG	|||||||||||||x|x||x|x	AUUUAGGGUUUAGGGAUUAGA	Bra027553	A09	-	11731010	11747949	16763	exon_intron
novel-m0812-3p	novel_circ_001306	12188	12208	-31.7	0.9814	UAAAUCCCAAAUCCCUAAUCC	||||||||||||||||||||x	AUUUAGGGUUUAGGGAUUAGA	Bra027553	A09	-	11731010	11747949	16763	exon_intron
novel-m0812-3p	novel_circ_001306	12209	12229	-31.7	0.9814	UAAAUCCCAAAUCCUUAAUUC	||||||||||||||o||||ox	AUUUAGGGUUUAGGGAUUAGA	Bra027553	A09	-	11731010	11747949	16763	exon_intron
miR5021-x	novel_circ_001322	3653	3670	-18.8	0.6104	CUCUUCUCCUUCUACUUC	|||||||x|||||x|||x	GAGAAGACGAAGAAGAAC	Bra029464	A09	+	17513043	17517010	3903	exon_intron
miR845-x	novel_circ_001328	13053	13074	-30.5	0.7625	GCGAGACUAUGGUGAACAAUCA	o||||||||||||x|||||o|x	UGCUCUGAUACCAAUUGUUGGC	Bra029555	A09	-	18257541	18277340	14756	exon_intron
novel-m0047-5p	novel_circ_001328	5452	5473	-30.3	0.7445	AUAGUCCAUAAACUCAUGGUGU	|||o||||o||x||||o|||||	UAUUAGGUGUUGGAGUGCCACA	Bra029555	A09	-	18257541	18277340	14756	exon_intron
novel-m0312-5p	novel_circ_001328	5452	5473	-30.3	0.7445	AUAGUCCAUAAACUCAUGGUGU	|||o||||o||x||||o|||||	UAUUAGGUGUUGGAGUGCCACA	Bra029555	A09	-	18257541	18277340	14756	exon_intron
novel-m0353-3p	novel_circ_001328	5452	5473	-30.3	0.7445	AUAGUCCAUAAACUCAUGGUGU	|||o||||o||x||||o|||||	UAUUAGGUGUUGGAGUGCCACA	Bra029555	A09	-	18257541	18277340	14756	exon_intron
novel-m0540-5p	novel_circ_001328	5452	5473	-30.3	0.7445	AUAGUCCAUAAACUCAUGGUGU	|||o||||o||x||||o|||||	UAUUAGGUGUUGGAGUGCCACA	Bra029555	A09	-	18257541	18277340	14756	exon_intron
novel-m0917-5p	novel_circ_001328	5452	5473	-30.3	0.7445	AUAGUCCAUAAACUCAUGGUGU	|||o||||o||x||||o|||||	UAUUAGGUGUUGGAGUGCCACA	Bra029555	A09	-	18257541	18277340	14756	exon_intron
miR845-x	novel_circ_001329	17886	17907	-30.5	0.7625	GCGAGACUAUGGUGAACAAUCA	o||||||||||||x|||||o|x	UGCUCUGAUACCAAUUGUUGGC	Bra029555	A09	-	18257541	18282288	19589	exon_intron
novel-m0047-5p	novel_circ_001329	10285	10306	-30.3	0.7445	AUAGUCCAUAAACUCAUGGUGU	|||o||||o||x||||o|||||	UAUUAGGUGUUGGAGUGCCACA	Bra029555	A09	-	18257541	18282288	19589	exon_intron
novel-m0312-5p	novel_circ_001329	10285	10306	-30.3	0.7445	AUAGUCCAUAAACUCAUGGUGU	|||o||||o||x||||o|||||	UAUUAGGUGUUGGAGUGCCACA	Bra029555	A09	-	18257541	18282288	19589	exon_intron
novel-m0353-3p	novel_circ_001329	10285	10306	-30.3	0.7445	AUAGUCCAUAAACUCAUGGUGU	|||o||||o||x||||o|||||	UAUUAGGUGUUGGAGUGCCACA	Bra029555	A09	-	18257541	18282288	19589	exon_intron
novel-m0540-5p	novel_circ_001329	10285	10306	-30.3	0.7445	AUAGUCCAUAAACUCAUGGUGU	|||o||||o||x||||o|||||	UAUUAGGUGUUGGAGUGCCACA	Bra029555	A09	-	18257541	18282288	19589	exon_intron
novel-m0917-5p	novel_circ_001329	10285	10306	-30.3	0.7445	AUAGUCCAUAAACUCAUGGUGU	|||o||||o||x||||o|||||	UAUUAGGUGUUGGAGUGCCACA	Bra029555	A09	-	18257541	18282288	19589	exon_intron
novel-m0399-3p	novel_circ_001336	18482	18502	-24.4	0.7416	UCUAUCCCAAAUCCCAAAUCA	|xx||||||||||||x||||x	AUUUAGGGUUUAGGGAUUAGA	Bra023215	A09	-	20668621	20693321	23637	exon_intron
novel-m0812-3p	novel_circ_001336	18482	18502	-24.4	0.7416	UCUAUCCCAAAUCCCAAAUCA	|xx||||||||||||x||||x	AUUUAGGGUUUAGGGAUUAGA	Bra023215	A09	-	20668621	20693321	23637	exon_intron
novel-m0399-3p	novel_circ_001337	22341	22361	-24.4	0.7416	UCUAUCCCAAAUCCCAAAUCA	|xx||||||||||||x||||x	AUUUAGGGUUUAGGGAUUAGA	Bra023215	A09	-	20668621	20697180	27496	exon_intron
novel-m0812-3p	novel_circ_001337	22341	22361	-24.4	0.7416	UCUAUCCCAAAUCCCAAAUCA	|xx||||||||||||x||||x	AUUUAGGGUUUAGGGAUUAGA	Bra023215	A09	-	20668621	20697180	27496	exon_intron
novel-m0084-5p	novel_circ_001338	6043	6063	-20.5	0.7428	UUCACUACAUCAAAAUUUUAA	|||x|||||||||||||||||	AAGGGAUGUAGUUUUAAAAUU	NA	A09	-	20729500	20741521	12022	intergenic
miR5021-x	novel_circ_001363	50	67	-20.4	0.6823	UUCUUCUUCUUCUUCCUA	o||||||x|||||||x|x	GAGAAGACGAAGAAGAAC	Bra032810	A09	+	23811729	23812019	291	antisense
miR1134-y	novel_circ_001369	7537	7555	-21.7	0.7306	UCGGUGUUCUUCUCCUUCU	|xx||||||||||x|||||	AAGCACAAGAAGAAGAAGA	Bra024613	A09	+	25246118	25261435	15318	antisense
miR5021-x	novel_circ_001370	3	20	-20.3	0.6789	UUCUCCUUCUUCUUCUUC	o|||x||x|||||||||x	GAGAAGACGAAGAAGAAC	Bra024611	A09	+	25295024	25295239	216	antisense
novel-m0045-5p	novel_circ_001375	800	821	-31.8	0.7813	AAACCGGUCCAGAUCGACGUAC	|||||||o|||o|||||x|||x	UUUGGCCGGGUUUAGCUUCAUC	Bra036100	A09	-	26828696	26833687	4992	exon_intron
novel-m0085-5p	novel_circ_001375	3018	3040	-23.7	0.6093	AUCUCACUAUAUUGCUUCUGUAU	||||||||||||ox|x|||x|||	UAGAGUGAUAUAGGGUAGAGAUA	Bra036100	A09	-	26828696	26833687	4992	exon_intron
novel-m0887-5p	novel_circ_001375	800	821	-31.8	0.7813	AAACCGGUCCAGAUCGACGUAC	|||||||o|||o|||||x|||x	UUUGGCCGGGUUUAGCUUCAUC	Bra036100	A09	-	26828696	26833687	4992	exon_intron
miR5021-x	novel_circ_001380	46	63	-19.5	0.6331	AUCUUCUCCUUCUUCUUC	x||||||x|||||||||x	GAGAAGACGAAGAAGAAC	NA	A09	+	27164906	27165101	196	intergenic
novel-m0727-5p	novel_circ_001385	5849	5869	-24.9	0.7176	AAAUGUCUCAGUUAUACUCAG	|||||||||||x|x|||||||	UUUACAGAGUCUACAUGAGUC	Bra006907	A09	+	27592571	27612592	19877	exon_intron
novel-m0953-5p	novel_circ_001388	3368	3389	-27.6	0.6765	AACACCAAAGGUUAAGGGGCUU	||||||||x||o||||||xx||	UUGUGGUUCCCGAUUCCCGAAA	Bra007007	A09	+	28290051	28302258	11430	exon_intron
miR9563-x	novel_circ_001390	2521	2543	-28.6	0.8746	UUGAGCAGAGAAUUGAAAAUUGA	||xx|||||||||||||||||||	AAACCGUCUCUUAACUUUUAACU	Bra007077	A09	-	28690098	28694439	4342	intronic
novel-m0006-5p	novel_circ_001390	2531	2553	-32.3	0.8613	UCCUAUAUUCUUGAGCAGAGAAU	o|x||||||||||||||||||||	GGAAUAUAAGAACUCGUCUCUUA	Bra007077	A09	-	28690098	28694439	4342	intronic
miR5021-x	novel_circ_001398	6103	6120	-18.7	0.6172	UUCUUCUUCUUCUACAUG	o||||||x|||||x|x||	GAGAAGACGAAGAAGAAC	Bra007389	A09	-	30479746	30488477	8390	exon_intron
miR5656-y	novel_circ_001398	3757	3774	-20.3	0.606	ACACUACAUCUCUGAACU	x||||x|||||||||x|o	AGUGAAGUAGAGACUGGG	Bra007389	A09	-	30479746	30488477	8390	exon_intron
miR5072-x	novel_circ_001400	74	91	-26.1	0.6887	GGUGGUCACUUUAGAGGU	o|x||||||||o||x|||	UCCCCAGUGAAGUCGCCA	Bra007440	A09	-	30739775	30741011	1237	antisense
miR5072-x	novel_circ_001400	1218	1235	-26.1	0.6887	GGGGAUCACUUUAGAGGU	o|||x||||||o||x|||	UCCCCAGUGAAGUCGCCA	Bra007440	A09	-	30739775	30741011	1237	antisense
novel-m0510-3p	novel_circ_001403	1246	1267	-23.6	0.7307	UAUACAAAUCUACCUGGUUGAU	||||x|||||||||||o|||xx	AUAUAUUUAGAUGGACUAACCU	Bra007592	A09	+	31444717	31449001	3896	exon_intron
novel-m0634-5p	novel_circ_001429	491	511	-31.1	0.7623	AAUUCCACAGGUGCAUCCGUU	x||ox||||||||||||||o|	AUAGAGUGUCCACGUAGGCGA	NA	A09	-	35000149	35000689	541	intergenic
novel-m0697-3p	novel_circ_001429	491	511	-31.1	0.7623	AAUUCCACAGGUGCAUCCGUU	x||ox||||||||||||||o|	AUAGAGUGUCCACGUAGGCGA	NA	A09	-	35000149	35000689	541	intergenic
novel-m0861-5p	novel_circ_001429	491	511	-31.1	0.7623	AAUUCCACAGGUGCAUCCGUU	x||ox||||||||||||||o|	AUAGAGUGUCCACGUAGGCGA	NA	A09	-	35000149	35000689	541	intergenic
bra-miR158-3p	novel_circ_001433	14332	14352	-20.5	0.6426	AAUAGUUUACAUCUGACUCGU	||xx|||||||||||xx||||	UUUCCAAAUGUAGACAAAGCA	Bra026882	A09	+	35844414	35861876	17363	exon_intron
bra-miR161-5p	novel_circ_001433	323	343	-26.5	0.7615	AGUUGCGUAACUUUCACUGCU	||||o|||x||||||||||x|	UCAAUGCACUGAAAGUGACUA	Bra026882	A09	+	35844414	35861876	17363	exon_intron
miR1134-y	novel_circ_001433	12310	12328	-24.1	0.8142	GUAGUGUUCUUCUUCUUCG	x|x|||||||||||||||x	AAGCACAAGAAGAAGAAGA	Bra026882	A09	+	35844414	35861876	17363	exon_intron
miR8594-x	novel_circ_001433	4609	4626	-17	0.6182	UACCUAUUCUCUUCUUAU	|||||||x||||||x|x|	AUGGAUAUGAGAAGCAAA	Bra026882	A09	+	35844414	35861876	17363	exon_intron
miR1134-y	novel_circ_001445	10020	10038	-20.6	0.6959	UUCGAUUUCUUCUUCUUCC	||||xx||||||||||||x	AAGCACAAGAAGAAGAAGA	Bra031584	A09	-	37422293	37468429	44862	exon_intron
miR1134-y	novel_circ_001445	18333	18351	-18.9	0.6258	UUAGUUUUCUUCUUCUUUG	||x||x|||||||||||ox	AAGCACAAGAAGAAGAAGA	Bra031584	A09	-	37422293	37468429	44862	exon_intron
miR477-x	novel_circ_001445	41445	41464	-26.9	0.6708	UUAGAGGAAGUUUCGGAGGU	|x|||||x||||o||o||||	ACUCUCCCUCAAGGCUUCCA	Bra031584	A09	-	37422293	37468429	44862	exon_intron
miR5021-x	novel_circ_001445	16625	16642	-19.7	0.6589	UGCCUCUGCUUCUUCUCG	ox|x||||||||||||x|	GAGAAGACGAAGAAGAAC	Bra031584	A09	-	37422293	37468429	44862	exon_intron
miR5021-x	novel_circ_001445	27649	27666	-21	0.6931	UUCUUCUGCUUCUUGCUA	o|||||||||||||xx|x	GAGAAGACGAAGAAGAAC	Bra031584	A09	-	37422293	37468429	44862	exon_intron
miR5293-x	novel_circ_001445	10013	10032	-23.3	0.6601	UUCUUCUUCUUCCUUCUUCU	||||||oox|||||||||||	AAGAAGGGCAAGGAAGAAGA	Bra031584	A09	-	37422293	37468429	44862	exon_intron
miR7121-x	novel_circ_001448	195	212	-25.1	0.711	GAGGAGAGUCACAAGAGG	|||||||oo|||xx||||	CUCCUCUUGGUGAACUCC	Bra032556	A09	+	38348564	38348860	297	one_exon
miR5021-x	novel_circ_001453	72	89	-19.9	0.6568	CUCUUCUUUUUCUUCUAA	|||||||xo|||||||xx	GAGAAGACGAAGAAGAAC	Bra015348	A10	-	1869720	1870349	630	antisense
novel-m0521-3p	novel_circ_001456	3025	3044	-28.9	0.6033	GUAUCCUCCUCUCCUACUCU	||x||||||||o|||x|o||	CAGAGGAGGAGGGGAGGGGA	Bra015257	A10	+	2362023	2377544	15522	antisense
miR5021-x	novel_circ_001460	1232	1249	-22.8	0.7525	CUCGACUGCUUCUUCUUC	|||xx||||||||||||x	GAGAAGACGAAGAAGAAC	Bra033294	A10	-	3083360	3084628	1269	exon_intron
novel-m0521-3p	novel_circ_001479	56	75	-39.4	0.8347	GCCUCCUCCUCCUCUCCCCA	|x||||||||||o||||||x	CAGAGGAGGAGGGGAGGGGA	Bra002861	A10	+	7140863	7141738	876	one_exon
miR825-y	novel_circ_001489	141	161	-25.8	0.6825	AAGAGGUCUUCCCGCUACUUG	|||||x||||||xxx||||||	UUCUCGAGAAGGUGCAUGAAC	Bra002755	A10	-	7907720	7909619	972	annot_exons
miR1134-y	novel_circ_001499	2321	2339	-21.3	0.722	UUCUUCUUCUUCUUUCUCU	|||x|x||||||||ox|||	AAGCACAAGAAGAAGAAGA	Bra002567	A10	-	8899378	8903273	3896	antisense
miR5021-x	novel_circ_001499	2325	2342	-19.8	0.6556	UUCUUCUUCUUCUUCUUU	o||||||x|||||||||x	GAGAAGACGAAGAAGAAC	Bra002567	A10	-	8899378	8903273	3896	antisense
miR7121-x	novel_circ_001505	29652	29669	-23.3	0.6695	AAAGAGAGCCACCUGAGG	x|x||||o||||x|||||	CUCCUCUUGGUGAACUCC	Bra002495	A10	-	9283248	9318961	35714	antisense
novel-m0844-5p	novel_circ_001505	3671	3693	-39.4	1	GGAACCCGGCCAAAAUAAGUUAU	|||||||||||||||||||||||	CCUUGGGCCGGUUUUAUUCAAUA	Bra002495	A10	-	9283248	9318961	35714	antisense
miR399-x	novel_circ_001535	837	854	-22.1	0.6369	UACAGAGGUAACGAUGAC	|x||||||||||xx||||	ACGUCUCCAUUGGCACUG	Bra008911	A10	-	13184820	13186123	1304	antisense
novel-m0799-5p	novel_circ_001538	3392	3412	-25.8	0.7988	UUUUUAUCGUGAUCUUCCUCU	||||||o|||||||||x||||	AAAAAUGGCACUAGAAAGAGA	Bra009023	A10	+	13698775	13706220	6769	exon_intron
novel-m0829-5p	novel_circ_001538	3394	3414	-23	0.6686	AGUUUUUAUCGUGAUCUUCCU	x|||||||||||||xx|o|||	ACAAAAAUAGCACUCAAGGGA	Bra009023	A10	+	13698775	13706220	6769	exon_intron
novel-m0006-5p	novel_circ_001540	935	957	-24.7	0.6604	CAUUAUAUUCUUGAGCAAAGAAU	|x|||||||||||||||x|||||	GGAAUAUAAGAACUCGUCUCUUA	Bra009034	A10	+	13769712	13773063	2507	exon_intron
miR9563-x	novel_circ_001555	1555	1577	-20.9	0.6391	UUUAGCAUAGAAUUGAAAAUUGA	|||x|||x|||||||||||||||	AAACCGUCUCUUAACUUUUAACU	Bra009237	A10	+	14709109	14711540	2432	antisense
miR3699-y	novel_circ_001586	611	628	-19.3	0.7201	UAUUGUCUUCUUUCUAUA	x|o||||||||||||xx|	UUGACAGAAGAAAGAGUU	NA	pseudoChr	+	3445431	3449499	4069	intergenic
miR5021-x	novel_circ_001589	774	791	-20.8	0.6957	UACUGCUGCUUCUUCUUC	ox||x||||||||||||x	GAGAAGACGAAGAAGAAC	NA	pseudoChr	-	4372626	4376331	3706	intergenic
miR7533-y	novel_circ_001607	1267	1285	-25.7	0.6799	CUUUUCCUUCUCUCUUCGA	||o|o|x|o||||||||||	GAGAGGAAGGAGAGAAGCU	NA	pseudoChr	-	9655701	9658310	2610	intergenic
miR1134-y	novel_circ_001612	2141	2159	-18.4	0.6073	UUCGUGUACUUGUUUUUAU	|||||||x|||x||o||x|	AAGCACAAGAAGAAGAAGA	Bra040683	pseudoChr	+	11807312	11811940	3363	exon_intron
miR1134-y	novel_circ_001614	4505	4523	-19.5	0.661	UUCGUAUACUUCUUCUUCU	|||||x|x|||||||||||	AAGCACAAGAAGAAGAAGA	Bra040759	pseudoChr	+	12733761	12752778	13525	exon_intron
miR1134-y	novel_circ_001614	10095	10113	-18.5	0.6229	UCGGUGUUUUUCAUCUUCU	|xx|||||o|||x||||||	AAGCACAAGAAGAAGAAGA	Bra040759	pseudoChr	+	12733761	12752778	13525	exon_intron
miR1134-y	novel_circ_001615	4505	4523	-19.5	0.661	UUCGUAUACUUCUUCUUCU	|||||x|x|||||||||||	AAGCACAAGAAGAAGAAGA	Bra040759	pseudoChr	+	12733761	12759710	20457	exon_intron
miR1134-y	novel_circ_001615	10095	10113	-18.5	0.6229	UCGGUGUUUUUCAUCUUCU	|xx|||||o|||x||||||	AAGCACAAGAAGAAGAAGA	Bra040759	pseudoChr	+	12733761	12759710	20457	exon_intron
miR7121-x	novel_circ_001616	215	232	-22.5	0.6303	AAGGAGAACCACCGUAGG	x|||||||||||xxx|||	CUCCUCUUGGUGAACUCC	Bra040763	pseudoChr	+	12775350	12778575	3158	exon_intron
miR5185-y	novel_circ_001617	2134	2151	-25.2	0.7139	CCUCUAACCGAACCUUCU	||||o|||||||x||||x	GGAGGUUGGCUUAGAAGC	Bra040763	pseudoChr	-	12775350	12778575	3226	antisense
novel-m0980-3p	novel_circ_001617	1573	1593	-21.8	0.6469	CAAAGCUUGAAACUACUAAAC	x||x||o|||||||||||||x	AUUCCGGACUUUGAUGAUUUC	Bra040763	pseudoChr	-	12775350	12778575	3226	antisense
miR5149-y	novel_circ_001618	3584	3601	-21.9	0.693	CUAGACGCUUCUAAGUUC	||x|||o|||||||o|o|	GAGCUGUGAAGAUUUAGG	NA	pseudoChr	-	12777961	12798391	20431	intergenic
miR845-x	novel_circ_001634	773	794	-26.9	0.6776	ACGAGACUAUGGUGAACUACUC	|||||||||||||x|||x||ox	UGCUCUGAUACCAAUUGUUGGC	NA	pseudoChr	-	18637241	18640403	3163	intergenic
miR1134-y	novel_circ_001635	60396	60414	-20.8	0.6887	AUCGUUUUUUUCUUCUUCU	x||||x||o||||||||||	AAGCACAAGAAGAAGAAGA	NA	pseudoChr	+	19635377	19721333	85957	intergenic
miR1153-y	novel_circ_001635	30700	30717	-17.6	0.6007	GAUUAGUGGUCAUAAUGA	x||||o|||||||xx|||	GUAAUUACCAGUAGCACU	NA	pseudoChr	+	19635377	19721333	85957	intergenic
miR5021-x	novel_circ_001635	20344	20361	-21.5	0.7143	CUCUUCUUCUUCUUCUCG	|||||||x||||||||x|	GAGAAGACGAAGAAGAAC	NA	pseudoChr	+	19635377	19721333	85957	intergenic
miR5021-x	novel_circ_001635	32520	32537	-19.5	0.6393	UUCUUCUUCUUCUUCUCG	o||||||x||||||||x|	GAGAAGACGAAGAAGAAC	NA	pseudoChr	+	19635377	19721333	85957	intergenic
miR5568-x	novel_circ_001635	75540	75559	-18.3	0.6267	CAAAGUUUAAUGAACAGCAA	|||x|||||||ox|||||||	GUUCCAAAUUAUAUGUCGUU	NA	pseudoChr	+	19635377	19721333	85957	intergenic
miR7533-y	novel_circ_001635	20140	20158	-28.1	0.7513	GUCUCCUCUCUCUCUUCGU	x||||||xo|||||||||x	GAGAGGAAGGAGAGAAGCU	NA	pseudoChr	+	19635377	19721333	85957	intergenic
novel-m0084-5p	novel_circ_001635	71716	71736	-22.1	0.8007	UUUUCUACAUCGAAAUUUUAA	||oo|||||||o|||||||||	AAGGGAUGUAGUUUUAAAAUU	NA	pseudoChr	+	19635377	19721333	85957	intergenic
novel-m0350-5p	novel_circ_001635	25447	25467	-27.9	0.8611	ACUUGGGUUCUUGCUGAGUAU	||||||||||||ox||||||x	UGAACCCAAGAAUAACUCAUU	NA	pseudoChr	+	19635377	19721333	85957	intergenic
novel-m0975-5p	novel_circ_001635	47944	47965	-24.3	0.7064	UCUAAGGCAAUGUAAAUUAAGU	||||||||||||o|||o|x|x|	AGAUUCCGUUACGUUUGACUAA	NA	pseudoChr	+	19635377	19721333	85957	intergenic
novel-m0135-3p	novel_circ_001636	10654	10674	-20	0.6494	AUCCUAUAUCCCAAACCCAAA	||x|||x||||||||x||x||	UAUGAUUUAGGGUUUAGGAUU	NA	pseudoChr	-	20328086	20384602	56517	intergenic
novel-m0135-3p	novel_circ_001636	10732	10752	-22.9	0.7435	AUCCUAUAUCCCAAACCCAAA	||x|||x||||||||x||x||	UAUGAUUUAGGGUUUAGGAUU	NA	pseudoChr	-	20328086	20384602	56517	intergenic
novel-m0161-3p	novel_circ_001636	10593	10613	-25	0.7716	UCCUAAAUCCUAAAUCCCUUA	||xo||||||||||||||xx|	AGAGUUUAGGAUUUAGGGUUU	NA	pseudoChr	-	20328086	20384602	56517	intergenic
novel-m0161-3p	novel_circ_001636	10738	10758	-23.6	0.7262	ACCCAAAUCCUAUAUCCCAAA	x|x|||||||||x||||||||	AGAGUUUAGGAUUUAGGGUUU	NA	pseudoChr	-	20328086	20384602	56517	intergenic
novel-m0225-3p	novel_circ_001636	10593	10613	-25	0.7716	UCCUAAAUCCUAAAUCCCUUA	||xo||||||||||||||xx|	AGAGUUUAGGAUUUAGGGUUU	NA	pseudoChr	-	20328086	20384602	56517	intergenic
novel-m0225-3p	novel_circ_001636	10738	10758	-23.6	0.7262	ACCCAAAUCCUAUAUCCCAAA	x|x|||||||||x||||||||	AGAGUUUAGGAUUUAGGGUUU	NA	pseudoChr	-	20328086	20384602	56517	intergenic
novel-m0392-3p	novel_circ_001636	10593	10613	-25	0.7716	UCCUAAAUCCUAAAUCCCUUA	||xo||||||||||||||xx|	AGAGUUUAGGAUUUAGGGUUU	NA	pseudoChr	-	20328086	20384602	56517	intergenic
novel-m0392-3p	novel_circ_001636	10738	10758	-23.6	0.7262	ACCCAAAUCCUAUAUCCCAAA	x|x|||||||||x||||||||	AGAGUUUAGGAUUUAGGGUUU	NA	pseudoChr	-	20328086	20384602	56517	intergenic
novel-m0399-3p	novel_circ_001636	10570	10590	-24	0.7407	UAAAUUUCAAAUCCCAAAUCA	|||||oo||||||||x||||x	AUUUAGGGUUUAGGGAUUAGA	NA	pseudoChr	-	20328086	20384602	56517	intergenic
novel-m0611-5p	novel_circ_001636	10593	10613	-25	0.7716	UCCUAAAUCCUAAAUCCCUUA	||xo||||||||||||||xx|	AGAGUUUAGGAUUUAGGGUUU	NA	pseudoChr	-	20328086	20384602	56517	intergenic
novel-m0611-5p	novel_circ_001636	10738	10758	-23.6	0.7262	ACCCAAAUCCUAUAUCCCAAA	x|x|||||||||x||||||||	AGAGUUUAGGAUUUAGGGUUU	NA	pseudoChr	-	20328086	20384602	56517	intergenic
novel-m0760-3p	novel_circ_001636	10594	10615	-25.5	0.8044	AAUCCUAAAUCCUAAAUCCCUU	||||||||||||||||||x|xx	UUAGGAUUUAGGAUUUAGUGUU	NA	pseudoChr	-	20328086	20384602	56517	intergenic
novel-m0812-3p	novel_circ_001636	10570	10590	-24	0.7407	UAAAUUUCAAAUCCCAAAUCA	|||||oo||||||||x||||x	AUUUAGGGUUUAGGGAUUAGA	NA	pseudoChr	-	20328086	20384602	56517	intergenic
novel-m0915-5p	novel_circ_001636	26169	26189	-31.6	0.8165	UCACCCCCUCUUAACAUCACU	|||||||||||||||||xx||	AGUGGGGGAGAAUUGUAACGA	NA	pseudoChr	-	20328086	20384602	56517	intergenic
novel-m0981-5p	novel_circ_001636	26169	26189	-31.6	0.8165	UCACCCCCUCUUAACAUCACU	|||||||||||||||||xx||	AGUGGGGGAGAAUUGUAACGA	NA	pseudoChr	-	20328086	20384602	56517	intergenic
