# Supplementary material for: Identification and Characterization of Circular RNAs in Brassica rapa in Response to Plasmodiophora brassicae
Source: Research Square preprint supplement (doi:10.21203/rs.3.rs-666198/v1), 2021-08-20
Supplement: Supplementary file 9 [file 77ba9f87bf241e09c410df57.xlsx]

## Sheet: Sheet1
The parental genes and their annotations in each comparison.
Source gene ID	Symbol	Description
Bra013579	3-Apr	PREDICTED: 5'-adenylylsulfate reductase 3, chloroplastic isoform X2 [Brassica rapa]
Bra039746	CICDH	PREDICTED: cytosolic isocitrate dehydrogenase [NADP] [Brassica rapa]
Bra012389	SPDSYN1	BnaA07g09790D [Brassica napus]
Bra019293	At4g23590	PREDICTED: cystine lyase CORI3-like [Brassica rapa]
