# Supplementary material for: Identification and Characterization of Circular RNAs in Brassica rapa in Response to Plasmodiophora brassicae
Source: Research Square preprint supplement (doi:10.21203/rs.3.rs-666198/v1), 2021-08-20
Supplement: Supplementary file 10 [file 972e212c91c52d314ef01a38.xlsx]

## Sheet: Sheet1
Differentially expressed circRNAs and their target genes in the circRNA-miRNA-mRNA network involve
CircRNA ID	miRNA ID	Target gene ID	Symbol	Description
novel_circ_000495	miR7121-x	Bra004951	CYP86A8	PREDICTED: cytochrome P450 86A8 [Brassica rapa]
		Bra013568	Zmynd15	PREDICTED: zinc finger MYND domain-containing protein 15 [Brassica rapa]
		Bra022410	At1g49730	PREDICTED: probable receptor-like protein kinase At1g49730 [Brassica rapa]
		Bra029715	At5g15080	PREDICTED: probable receptor-like protein kinase At3g55450 [Brassica rapa]
		Bra036269	LECRK43	PREDICTED: L-type lectin-domain containing receptor kinase IV.4-like, partial [Brassica rapa]	-	-	-	-	-	-	-
	miR5656-y	Bra010573	ATHB-40	PREDICTED: homeobox-leucine zipper protein ATHB-40-like [Brassica napus]
		Bra011339	-	PREDICTED: zinc finger protein ZIC 2 isoform X2 [Brassica oleracea var. oleracea] [Brassica oleracea]
		Bra019321	CRK15	PREDICTED: cysteine-rich receptor-like protein kinase 15 [Brassica oleracea var. oleracea] [Brassica oleracea]
		Bra026508	CYP705A20	PREDICTED: cytochrome P450 705A5-like [Brassica rapa]
	miR3699-y	Bra000130	At2g39360	PREDICTED: probable receptor-like protein kinase At2g39360 [Brassica rapa]
		Bra011685	SAMT	PREDICTED: salicylate carboxymethyltransferase [Brassica rapa]
		Bra015587	At2g14510	PREDICTED: leucine-rich repeat receptor-like serine/threonine-protein kinase At2g14510 isoform X2 [Brassica napus]
		Bra016207	CRK2	PREDICTED: cysteine-rich receptor-like protein kinase 2 [Brassica rapa]
		Bra017763	SAMT	PREDICTED: salicylate carboxymethyltransferase-like [Brassica rapa]
		Bra027938	At3g47570	PREDICTED: LOW QUALITY PROTEIN: probable LRR receptor-like serine/threonine-protein kinase At3g47570 [Brassica rapa]
		Bra030340	At2g43260	PREDICTED: F-box/LRR-repeat protein At2g43260-like isoform X2 [Brassica rapa]
		Bra034551	FBL15	PREDICTED: F-box/LRR-repeat protein 15-like [Brassica napus]
novel_circ_001061	miR5043-x	Bra000372	ZAT4	PREDICTED: zinc finger protein ZAT4 isoform X1 [Brassica rapa]	-	-	-	-	GO:0043227//membrane-bounded organelle;GO:0043226//organelle;GO:0044464//cell part;GO:0005623//cell;GO:0044424//intracellular part;GO:0043231//intracellular membrane-bounded organelle;GO:0043229//intracellular organelle;GO:0005622//intracellular
		Bra015917	At1g74360	PREDICTED: probable LRR receptor-like serine/threonine-protein kinase At1g74360 [Brassica rapa]	-	-	-	-	GO:0044424//intracellular part;GO:0043226//organelle;GO:0016020//membrane;GO:0005622//intracellular;GO:0005623//cell;GO:0043227//membrane-bounded organelle;GO:0043229//intracellular organelle;GO:0044464//cell part;GO:0043231//intracellular membrane-bounded organelle	GO:0097159//organic cyclic compound binding;GO:0032549//ribonucleoside binding;GO:1901363//heterocyclic compound binding;GO:0001883//purine nucleoside binding;GO:0036094//small molecule binding;GO:0032550//purine ribonucleoside binding;GO:0005488//binding;GO:0001882//nucleoside binding;GO:0097367//carbohydrate derivative binding
		Bra037299	NERD	PREDICTED: zinc finger CCCH domain-containing protein 19 [Brassica rapa]	-	-	-	-	-	-
