# Supplementary material for: Identification and Characterization of Circular RNAs in Brassica rapa in Response to Plasmodiophora brassicae
Source: Research Square preprint supplement (doi:10.21203/rs.3.rs-666198/v1), 2021-08-20
Supplement: Supplementary file 11 [file a9f0264f19876732e2973f84.xlsx]

## Sheet: Sheet1
	KEGG analysis of DE genes in response to P. brassicae infection at 8 and 23 dpi of B.rapa
	ck-0d-vs-Pb4-8d Pathway Enrichment
#	Pathway	DEGs genes with pathway annotation (4)	All genes with pathway annotation (8502)	Pvalue	Qvalue	Pathway ID
1	Sulfur metabolism	1 (25%)	71 (0.84%)	0.032994	0.164548	ko00920
2	Microbial metabolism in diverse environments	2 (50%)	733 (8.62%)	0.0396	0.164548	ko01120
3	Citrate cycle (TCA cycle)	1 (25%)	105 (1.24%)	0.048501	0.164548	ko00020
4	2-Oxocarboxylic acid metabolism	1 (25%)	140 (1.65%)	0.064269	0.164548	ko01210
5	Glutathione metabolism	1 (25%)	153 (1.8%)	0.070075	0.164548	ko00480
6	Peroxisome	1 (25%)	154 (1.81%)	0.070521	0.164548	ko04146
7	Plant-pathogen interaction	1 (25%)	366 (4.3%)	0.161418	0.284327	ko04626
8	Protein processing in endoplasmic reticulum	1 (25%)	376 (4.42%)	0.165534	0.284327	ko04141
9	Biosynthesis of amino acids	1 (25%)	435 (5.12%)	0.189511	0.284327	ko01230
10	Carbon metabolism	1 (25%)	469 (5.52%)	0.203091	0.284327	ko01200
11	Plant hormone signal transduction	1 (25%)	573 (6.74%)	0.243573	0.310002	ko04075
12	Biosynthesis of antibiotics	1 (25%)	799 (9.4%)	0.326212	0.38058	ko01130
13	Biosynthesis of secondary metabolites	1 (25%)	1938 (22.79%)	0.644778	0.694377	ko01110
14	Metabolic pathways	1 (25%)	3260 (38.34%)	0.855552	0.855552	ko01100
	ck-0d-vs-Pb4-23d Pathway Enrichment
#	Pathway	DEGs genes with pathway annotation (14)	All genes with pathway annotation (8502)	Pvalue	Qvalue	Pathway ID
1	Ubiquitin mediated proteolysis	2 (14.29%)	252 (2.96%)	0.062998	0.384334	ko04120
2	Phenylpropanoid biosynthesis	2 (14.29%)	300 (3.53%)	0.085431	0.384334	ko00940
3	Sulfur metabolism	1 (7.14%)	71 (0.84%)	0.110855	0.384334	ko00920
4	Plant-pathogen interaction	2 (14.29%)	366 (4.3%)	0.119662	0.384334	ko04626
5	Phenylalanine, tyrosine and tryptophan biosynthesis	1 (7.14%)	84 (0.99%)	0.129872	0.384334	ko00400
6	Pentose phosphate pathway	1 (7.14%)	88 (1.04%)	0.135647	0.384334	ko00030
7	RNA degradation	1 (7.14%)	208 (2.45%)	0.29322	0.605907	ko03018
8	Microbial metabolism in diverse environments	2 (14.29%)	733 (8.62%)	0.34318	0.605907	ko01120
9	Biosynthesis of antibiotics	2 (14.29%)	799 (9.4%)	0.384194	0.605907	ko01130
10	RNA transport	1 (7.14%)	298 (3.51%)	0.393411	0.605907	ko03013
11	Biosynthesis of secondary metabolites	4 (28.57%)	1938 (22.79%)	0.400235	0.605907	ko01110
12	Spliceosome	1 (7.14%)	332 (3.9%)	0.427699	0.605907	ko03040
13	Biosynthesis of amino acids	1 (7.14%)	435 (5.12%)	0.520904	0.665955	ko01230
14	Carbon metabolism	1 (7.14%)	469 (5.52%)	0.548434	0.665955	ko01200
15	Plant hormone signal transduction	1 (7.14%)	573 (6.74%)	0.623794	0.667697	ko04075
16	Ribosome	1 (7.14%)	580 (6.82%)	0.628421	0.667697	ko03010
17	Metabolic pathways	4 (28.57%)	3260 (38.34%)	0.848251	0.848251	ko01100
	ck-0d-vs-PbE-8d Pathway Enrichment
#	Pathway	DEGs genes with pathway annotation (6)	All genes with pathway annotation (8502)	Pvalue	Qvalue	Pathway ID
1	Sulfur metabolism	1 (16.67%)	71 (0.84%)	0.049085	0.240942	ko00920
2	beta-Alanine metabolism	1 (16.67%)	75 (0.88%)	0.05179	0.240942	ko00410
3	Pentose phosphate pathway	1 (16.67%)	88 (1.04%)	0.060535	0.240942	ko00030
4	Arginine and proline metabolism	1 (16.67%)	103 (1.21%)	0.070543	0.240942	ko00330
5	Microbial metabolism in diverse environments	2 (33.33%)	733 (8.62%)	0.088175	0.240942	ko01120
6	Glutathione metabolism	1 (16.67%)	153 (1.8%)	0.103261	0.240942	ko00480
7	Cysteine and methionine metabolism	1 (16.67%)	187 (2.2%)	0.124956	0.249913	ko00270
8	Endocytosis	1 (16.67%)	303 (3.56%)	0.195714	0.3425	ko04144
9	Plant-pathogen interaction	1 (16.67%)	366 (4.3%)	0.2321	0.361045	ko04626
10	Carbon metabolism	1 (16.67%)	469 (5.52%)	0.288631	0.404083	ko01200
11	Ribosome	1 (16.67%)	580 (6.82%)	0.345626	0.439887	ko03010
12	Biosynthesis of antibiotics	1 (16.67%)	799 (9.4%)	0.446964	0.521458	ko01130
13	Metabolic pathways	2 (33.33%)	3260 (38.34%)	0.740166	0.78833	ko01100
14	Biosynthesis of secondary metabolites	1 (16.67%)	1938 (22.79%)	0.78833	0.78833	ko01110
	ck-0d-vs-PbE-23d Pathway Enrichment
#	Pathway	DEGs genes with pathway annotation (19)	All genes with pathway annotation (8502)	Pvalue	Qvalue	Pathway ID
1	Vitamin B6 metabolism	1 (5.26%)	21 (0.25%)	0.045949	0.396601	ko00750
2	Microbial metabolism in diverse environments	4 (21.05%)	733 (8.62%)	0.074992	0.396601	ko01120
3	Lysine degradation	1 (5.26%)	51 (0.6%)	0.108133	0.396601	ko00310
4	Ribosome	3 (15.79%)	580 (6.82%)	0.135862	0.396601	ko03010
5	Phenylpropanoid biosynthesis	2 (10.53%)	300 (3.53%)	0.14335	0.396601	ko00940
6	alpha-Linolenic acid metabolism	1 (5.26%)	70 (0.82%)	0.145508	0.396601	ko00592
7	Sulfur metabolism	1 (5.26%)	71 (0.84%)	0.147434	0.396601	ko00920
8	Nitrogen metabolism	1 (5.26%)	73 (0.86%)	0.151272	0.396601	ko00910
9	Pentose phosphate pathway	1 (5.26%)	88 (1.04%)	0.179544	0.396601	ko00030
10	Alanine, aspartate and glutamate metabolism	1 (5.26%)	93 (1.09%)	0.188768	0.396601	ko00250
11	Plant-pathogen interaction	2 (10.53%)	366 (4.3%)	0.196039	0.396601	ko04626
12	Arginine and proline metabolism	1 (5.26%)	103 (1.21%)	0.206922	0.396601	ko00330
13	Glycine, serine and threonine metabolism	1 (5.26%)	128 (1.51%)	0.250638	0.402162	ko00260
14	Biosynthesis of amino acids	2 (10.53%)	435 (5.12%)	0.253594	0.402162	ko01230
15	Biosynthesis of antibiotics	3 (15.79%)	799 (9.4%)	0.262279	0.402162	ko01130
16	Carbon metabolism	2 (10.53%)	469 (5.52%)	0.282343	0.405869	ko01200
17	RNA degradation	1 (5.26%)	208 (2.45%)	0.375696	0.508294	ko03018
18	Amino sugar and nucleotide sugar metabolism	1 (5.26%)	244 (2.87%)	0.425271	0.53671	ko00520
19	Biosynthesis of secondary metabolites	5 (26.32%)	1938 (22.79%)	0.443369	0.53671	ko01110
20	RNA transport	1 (5.26%)	298 (3.51%)	0.492696	0.5666	ko03013
21	Spliceosome	1 (5.26%)	332 (3.9%)	0.531227	0.58182	ko03040
22	Metabolic pathways	7 (36.84%)	3260 (38.34%)	0.637992	0.666991	ko01100
23	Plant hormone signal transduction	1 (5.26%)	573 (6.74%)	0.734773	0.734773	ko04075
	PbE-8d-vs-Pb4-8d Pathway Enrichment
#	Pathway	DEGs genes with pathway annotation (2)	All genes with pathway annotation (8502)	Pvalue	Qvalue	Pathway ID
1	Cysteine and methionine metabolism	2 (100%)	187 (2.2%)	0.000481	0.006737	ko00270
2	Isoquinoline alkaloid biosynthesis	1 (50%)	43 (0.51%)	0.01009	0.034411	ko00950
3	Tropane, piperidine and pyridine alkaloid biosynthesis	1 (50%)	69 (0.81%)	0.016167	0.034411	ko00960
4	Tyrosine metabolism	1 (50%)	70 (0.82%)	0.0164	0.034411	ko00350
5	beta-Alanine metabolism	1 (50%)	75 (0.88%)	0.017566	0.034411	ko00410
6	Phenylalanine metabolism	1 (50%)	78 (0.92%)	0.018266	0.034411	ko00360
7	Ubiquinone and other terpenoid-quinone biosynthesis	1 (50%)	80 (0.94%)	0.018732	0.034411	ko00130
8	Phenylalanine, tyrosine and tryptophan biosynthesis	1 (50%)	84 (0.99%)	0.019664	0.034411	ko00400
9	Arginine and proline metabolism	1 (50%)	103 (1.21%)	0.024084	0.037464	ko00330
10	Glutathione metabolism	1 (50%)	153 (1.8%)	0.03567	0.049938	ko00480
11	Biosynthesis of amino acids	1 (50%)	435 (5.12%)	0.099717	0.126912	ko01230
12	Metabolic pathways	2 (100%)	3260 (38.34%)	0.146998	0.171497	ko01100
13	Biosynthesis of antibiotics	1 (50%)	799 (9.4%)	0.179134	0.192913	ko01130
14	Biosynthesis of secondary metabolites	1 (50%)	1938 (22.79%)	0.403954	0.403954	ko01110
	PbE-23d-vs-Pb4-23d Pathway Enrichment
#	Pathway	DEGs genes with pathway annotation (5)	All genes with pathway annotation (8502)	Pvalue	Qvalue	Pathway ID
1	Ribosome	2 (40%)	580 (6.82%)	0.040461	0.193779	ko03010
2	Phenylalanine, tyrosine and tryptophan biosynthesis	1 (20%)	84 (0.99%)	0.048445	0.193779	ko00400
3	RNA degradation	1 (20%)	208 (2.45%)	0.11651	0.279405	ko03018
4	Ubiquitin mediated proteolysis	1 (20%)	252 (2.96%)	0.139703	0.279405	ko04120
5	Biosynthesis of amino acids	1 (20%)	435 (5.12%)	0.230998	0.369597	ko01230
6	Biosynthesis of antibiotics	1 (20%)	799 (9.4%)	0.389563	0.519417	ko01130
7	Biosynthesis of secondary metabolites	1 (20%)	1938 (22.79%)	0.725788	0.829472	ko01110
8	Metabolic pathways	1 (20%)	3260 (38.34%)	0.910965	0.910965	ko01100
