# Supplementary material for: Identification and Characterization of Circular RNAs in Brassica rapa in Response to Plasmodiophora brassicae
Source: Research Square preprint supplement (doi:10.21203/rs.3.rs-666198/v1), 2021-08-20
Supplement: Supplementary file 12 [file d79143a32ca4293870e65a9d.xlsx]

## Sheet: Sheet1
The target genes and their annotation of the 2 differentially expressed circRNAs
circRNA ID	miRNA ID	mRNA ID	Symblo	Description	KEGG_A_class	KEGG_B_class	Pathway	K_ID	GO Component	GO Function	GO Process
novel_circ_000495	miR7121-x	Bra000333	IP5P12	PREDICTED: type I inositol polyphosphate 5-phosphatase 12 [Brassica rapa]	-	-	-	-	-	-	-
novel_circ_000495	miR7121-x	Bra000647	MEKK1	PREDICTED: mitogen-activated protein kinase kinase kinase 1-like [Brassica rapa]	Organismal Systems	Environmental adaptation	ko04626//Plant-pathogen interaction	K13414	-	-	-
novel_circ_000495	miR7121-x	Bra000729	At4g10930	BnaA03g24630D [Brassica napus]	-	-	-	-	-	-	-
novel_circ_000495	miR7121-x	Bra000875	GSTF3	PREDICTED: glutathione S-transferase F3-like [Brassica rapa]	Metabolism	Metabolism of other amino acids	ko00480//Glutathione metabolism	K00799	GO:0044424//intracellular part;GO:0044464//cell part;GO:0005623//cell;GO:0016020//membrane;GO:0005622//intracellular	GO:0003824//catalytic activity	GO:0051707//response to other organism;GO:0044710//single-organism metabolic process;GO:0009605//response to external stimulus;GO:0009987//cellular process;GO:0044237//cellular metabolic process;GO:0009620//response to fungus;GO:0050896//response to stimulus;GO:0019748//secondary metabolic process;GO:0009607//response to biotic stimulus;GO:0043207//response to external biotic stimulus;GO:0044699/…
novel_circ_000495	miR7121-x	Bra000876	GSTF2	PREDICTED: glutathione S-transferase F2-like [Brassica rapa]	Metabolism	Metabolism of other amino acids	ko00480//Glutathione metabolism	K00799	GO:0044435//plastid part;GO:0005623//cell;GO:0043227//membrane-bounded organelle;GO:0044424//intracellular part;GO:0009536//plastid;GO:0044422//organelle part;GO:0009532//plastid stroma;GO:0030054//cell junction;GO:0043226//organelle;GO:0005576//extracellular region;GO:0005622//intracellular;GO:0043231//intracellular membrane-bounded organelle;GO:0005911//cell-cell junction;GO:0043229//intracellu…	GO:0003824//catalytic activity;GO:0016740//transferase activity;GO:0097159//organic cyclic compound binding;GO:0005488//binding;GO:0016765//transferase activity, transferring alkyl or aryl (other than methyl) groups;GO:0072341//modified amino acid binding	GO:0051707//response to other organism;GO:0044699//single-organism process;GO:0044710//single-organism metabolic process;GO:0044763//single-organism cellular process;GO:0009607//response to biotic stimulus;GO:0044237//cellular metabolic process;GO:0019748//secondary metabolic process;GO:0010038//response to metal ion;GO:0050896//response to stimulus;GO:0009628//response to abiotic stimulus;GO:000…
novel_circ_000495	miR7121-x	Bra001512	-	PREDICTED: IQ domain-containing protein IQM2-like [Brassica rapa]	-	-	-	-	-	-	-
novel_circ_000495	miR7121-x	Bra001757	rlmN1	PREDICTED: dual-specificity RNA methyltransferase RlmN 1-like [Brassica napus]	-	-	-	-	-	-	GO:0009987//cellular process;GO:0043170//macromolecule metabolic process;GO:0071704//organic substance metabolic process;GO:0010467//gene expression;GO:0007049//cell cycle;GO:0044699//single-organism process;GO:0008152//metabolic process;GO:0044763//single-organism cellular process
novel_circ_000495	miR7121-x	Bra002134	NCBP	PREDICTED: eukaryotic translation initiation factor NCBP isoform X1 [Brassica rapa]	Genetic Information Processing	Translation	ko03013//RNA transport	K03259	-	-	-
novel_circ_000495	miR7121-x	Bra002830	-	BnaA10g10480D [Brassica napus]	Genetic Information Processing	Replication and repair	ko03420//Nucleotide excision repair;ko03440//Homologous recombination;ko03030//DNA replication;ko03430//Mismatch repair	K07466	-	-	-
novel_circ_000495	miR7121-x	Bra002847	-	PREDICTED: transcription factor MYB80 isoform X1 [Brassica rapa]	-	-	-	-	-	-	-
novel_circ_000495	miR7121-x	Bra003652	QUA2	PREDICTED: probable pectin methyltransferase QUA2 [Brassica rapa]	-	-	-	-	-	-	-
novel_circ_000495	miR7121-x	Bra004420	SCC3	PREDICTED: sister-chromatid cohesion protein 3 [Brassica rapa]	-	-	-	-	GO:0043228//non-membrane-bounded organelle;GO:0043229//intracellular organelle;GO:0044464//cell part;GO:0043227//membrane-bounded organelle;GO:0043226//organelle;GO:0005623//cell;GO:0044424//intracellular part;GO:0043232//intracellular non-membrane-bounded organelle;GO:0043231//intracellular membrane-bounded organelle;GO:0005622//intracellular	-	GO:0050896//response to stimulus;GO:0006886//intracellular protein transport;GO:0043574//peroxisomal transport;GO:0098813//nuclear chromosome segregation;GO:0044248//cellular catabolic process;GO:0007059//chromosome segregation;GO:0051276//chromosome organization;GO:0051649//establishment of localization in cell;GO:0008152//metabolic process;GO:0043170//macromolecule metabolic process;GO:0022402/…
novel_circ_000495	miR7121-x	Bra004508	ARP1	BnaA05g01100D [Brassica napus]	-	-	-	-	-	-	-
novel_circ_000495	miR7121-x	Bra004926	At2g45640	PREDICTED: histone deacetylase complex subunit SAP18 isoform X2 [Brassica rapa]	Genetic Information Processing	Translation	ko03013//RNA transport;ko03015//mRNA surveillance pathway	K14324	GO:0044464//cell part;GO:0044422//organelle part;GO:0070013//intracellular organelle lumen;GO:0043229//intracellular organelle;GO:0031981//nuclear lumen;GO:0031974//membrane-enclosed lumen;GO:0044428//nuclear part;GO:0043231//intracellular membrane-bounded organelle;GO:0005623//cell;GO:0044446//intracellular organelle part;GO:0044424//intracellular part;GO:0043227//membrane-bounded organelle;GO:0…	GO:0005488//binding	GO:0044255//cellular lipid metabolic process;GO:0044699//single-organism process;GO:0044710//single-organism metabolic process;GO:0044763//single-organism cellular process;GO:0009987//cellular process;GO:0006970//response to osmotic stress;GO:0044281//small molecule metabolic process;GO:0043436//oxoacid metabolic process;GO:0001101//response to acid chemical;GO:0008152//metabolic process;GO:00197…
novel_circ_000495	miR7121-x	Bra004951	CYP86A8	PREDICTED: cytochrome P450 86A8 [Brassica rapa]	Metabolism	Lipid metabolism;Global and Overview	ko01100//Metabolic pathways;ko00073//Cutin, suberine and wax biosynthesis	K15398	-	GO:0016491//oxidoreductase activity;GO:0016705//oxidoreductase activity, acting on paired donors, with incorporation or reduction of molecular oxygen;GO:0003824//catalytic activity;GO:0016713//oxidoreductase activity, acting on paired donors, with incorporation or reduction of molecular oxygen, reduced iron-sulfur protein as one donor, and incorporation of one atom of oxygen;GO:0005488//binding;G…	GO:0044237//cellular metabolic process;GO:0044710//single-organism metabolic process;GO:0044281//small molecule metabolic process;GO:0019752//carboxylic acid metabolic process;GO:0043436//oxoacid metabolic process;GO:0044699//single-organism process;GO:0008152//metabolic process;GO:0009987//cellular process;GO:0071704//organic substance metabolic process;GO:0032787//monocarboxylic acid metabolic …
novel_circ_000495	miR7121-x	Bra005295	-	BnaUnng00440D [Brassica napus]	-	-	-	-	-	-	-
novel_circ_000495	miR7121-x	Bra005800	SGO1	BnaA03g01210D [Brassica napus]	-	-	-	-	-	-	GO:0006725//cellular aromatic compound metabolic process;GO:0010467//gene expression;GO:0051276//chromosome organization;GO:0006796//phosphate-containing compound metabolic process;GO:0065007//biological regulation;GO:0006807//nitrogen compound metabolic process;GO:0044710//single-organism metabolic process;GO:0006793//phosphorus metabolic process;GO:0008152//metabolic process;GO:0048285//organel…
novel_circ_000495	miR7121-x	Bra006035	MED26C	PREDICTED: probable mediator of RNA polymerase II transcription subunit 26c isoform X1 [Brassica rapa]	-	-	-	-	GO:0044444//cytoplasmic part;GO:0005622//intracellular;GO:0005623//cell;GO:0044464//cell part;GO:0005737//cytoplasm;GO:0044424//intracellular part	-	-
novel_circ_000495	miR7121-x	Bra006658	RPL4A	PREDICTED: 60S ribosomal protein L4-1-like [Brassica oleracea var. oleracea] [Brassica oleracea]	Genetic Information Processing	Translation	ko03010//Ribosome	K02930	-	-	-
novel_circ_000495	miR7121-x	Bra007090	PHT1-7	PREDICTED: probable inorganic phosphate transporter 1-7 [Brassica rapa]	-	-	-	-	-	-	-
novel_circ_000495	miR7121-x	Bra007812	UGT71C3	PREDICTED: UDP-glycosyltransferase 71C3-like [Brassica rapa]	-	-	-	-	-	GO:0016757//transferase activity, transferring glycosyl groups;GO:0016740//transferase activity;GO:0008194//UDP-glycosyltransferase activity;GO:0016758//transferase activity, transferring hexosyl groups;GO:0035251//UDP-glucosyltransferase activity;GO:0003824//catalytic activity;GO:0046527//glucosyltransferase activity	GO:0000160//phosphorelay signal transduction system;GO:0009987//cellular process;GO:0050789//regulation of biological process;GO:0023052//signaling;GO:0044699//single-organism process;GO:0050896//response to stimulus;GO:0065007//biological regulation;GO:0007165//signal transduction;GO:0007154//cell communication;GO:0044700//single organism signaling;GO:0035556//intracellular signal transduction;G…
novel_circ_000495	miR7121-x	Bra007987	-	PREDICTED: uncharacterized protein LOC103852727 [Brassica rapa]	-	-	-	-	-	-	-
novel_circ_000495	miR7121-x	Bra008124	SSL11	PREDICTED: protein STRICTOSIDINE SYNTHASE-LIKE 11-like [Brassica rapa]	Metabolism	Global and Overview;Biosynthesis of other secondary metabolites	ko01100//Metabolic pathways;ko01110//Biosynthesis of secondary metabolites;ko00901//Indole alkaloid biosynthesis	K01757	GO:0043231//intracellular membrane-bounded organelle;GO:0044446//intracellular organelle part;GO:0044464//cell part;GO:0005773//vacuole;GO:0005737//cytoplasm;GO:0005623//cell;GO:0043226//organelle;GO:0043227//membrane-bounded organelle;GO:0009536//plastid;GO:0044422//organelle part;GO:0043229//intracellular organelle;GO:0005911//cell-cell junction;GO:0044444//cytoplasmic part;GO:0016020//membrane…	GO:0016758//transferase activity, transferring hexosyl groups;GO:0016829//lyase activity;GO:0016840//carbon-nitrogen lyase activity;GO:0046527//glucosyltransferase activity;GO:0016757//transferase activity, transferring glycosyl groups;GO:0003824//catalytic activity;GO:0016740//transferase activity;GO:0016843//amine-lyase activity	GO:0050896//response to stimulus;GO:1901576//organic substance biosynthetic process;GO:0043647//inositol phosphate metabolic process;GO:0044763//single-organism cellular process;GO:0009247//glycolipid biosynthetic process;GO:0044255//cellular lipid metabolic process;GO:0006066//alcohol metabolic process;GO:0044238//primary metabolic process;GO:0044765//single-organism transport;GO:1901615//organi…
novel_circ_000495	miR7121-x	Bra008125	SSL11	PREDICTED: protein STRICTOSIDINE SYNTHASE-LIKE 11-like [Brassica rapa]	Metabolism	Global and Overview;Biosynthesis of other secondary metabolites	ko01100//Metabolic pathways;ko01110//Biosynthesis of secondary metabolites;ko00901//Indole alkaloid biosynthesis	K01757	-	-	-
novel_circ_000495	miR7121-x	Bra008353	QUA2	BnaA02g18830D [Brassica napus]	-	-	-	-	-	-	-
novel_circ_000495	miR7121-x	Bra009078	MED26C	PREDICTED: probable mediator of RNA polymerase II transcription subunit 26c [Brassica rapa]	-	-	-	-	GO:0005623//cell;GO:0044424//intracellular part;GO:0044464//cell part;GO:0005622//intracellular;GO:0005737//cytoplasm;GO:0044444//cytoplasmic part	-	-
novel_circ_000495	miR7121-x	Bra009753	MIP2	PREDICTED: MAG2-interacting protein 2 [Brassica rapa]	-	-	-	-	-	-	GO:0030029//actin filament-based process;GO:0036211//protein modification process;GO:0030036//actin cytoskeleton organization;GO:0071704//organic substance metabolic process;GO:0044238//primary metabolic process;GO:0048856//anatomical structure development;GO:0030154//cell differentiation;GO:0000003//reproduction;GO:0070646//protein modification by small protein removal;GO:0003006//developmental …
novel_circ_000495	miR7121-x	Bra009886	SLC25A44	PREDICTED: solute carrier family 25 member 44 [Brassica rapa]	-	-	-	-	GO:0043226//organelle;GO:0043229//intracellular organelle;GO:0005622//intracellular;GO:0044422//organelle part;GO:0019866//organelle inner membrane;GO:0031967//organelle envelope;GO:0016020//membrane;GO:0044424//intracellular part;GO:0044446//intracellular organelle part;GO:0005623//cell;GO:0031090//organelle membrane;GO:0043227//membrane-bounded organelle;GO:0044464//cell part;GO:0031975//envelo…	-	GO:0046907//intracellular transport;GO:0051641//cellular localization;GO:0051234//establishment of localization;GO:0051179//localization;GO:0044699//single-organism process;GO:1902578//single-organism localization;GO:0044765//single-organism transport;GO:0006810//transport;GO:1902582//single-organism intracellular transport;GO:0051649//establishment of localization in cell
novel_circ_000495	miR7121-x	Bra010058	ATK5	BnaA06g21560D [Brassica napus]	-	-	-	-	-	-	-
novel_circ_000495	miR7121-x	Bra010546	-	BnaA08g15110D [Brassica napus]	-	-	-	-	GO:0044424//intracellular part;GO:0043226//organelle;GO:0005622//intracellular;GO:0043227//membrane-bounded organelle;GO:0043229//intracellular organelle;GO:0005623//cell;GO:0043231//intracellular membrane-bounded organelle;GO:0044464//cell part	-	-
novel_circ_000495	miR7121-x	Bra010850	At4g18596	PREDICTED: pollen-specific protein-like At4g18596 [Brassica rapa]	-	-	-	-	GO:0005576//extracellular region	-	GO:0009653//anatomical structure morphogenesis;GO:0030154//cell differentiation;GO:0000902//cell morphogenesis;GO:0071840//cellular component organization or biogenesis;GO:0044767//single-organism developmental process;GO:0071669//plant-type cell wall organization or biogenesis;GO:0009664//plant-type cell wall organization;GO:0045229//external encapsulating structure organization;GO:0044763//sing…
novel_circ_000495	miR7121-x	Bra011551	RPS3AB	PREDICTED: 40S ribosomal protein S3a-2 [Brassica rapa]	Genetic Information Processing	Translation	ko03010//Ribosome	K02984	-	-	-
novel_circ_000495	miR7121-x	Bra012155	PUB2	PREDICTED: U-box domain-containing protein 2 [Brassica rapa]	-	-	-	-	-	-	-
novel_circ_000495	miR7121-x	Bra012400	-	BnaUnng00440D [Brassica napus]	-	-	-	-	-	-	-
novel_circ_000495	miR7121-x	Bra012469	ALA12	BnaA07g37090D [Brassica napus]	-	-	-	-	GO:0005622//intracellular;GO:0044444//cytoplasmic part;GO:0043229//intracellular organelle;GO:0043226//organelle;GO:0005737//cytoplasm;GO:0044446//intracellular organelle part;GO:0031967//organelle envelope;GO:0044435//plastid part;GO:0031975//envelope;GO:0044422//organelle part;GO:0005623//cell;GO:0009526//plastid envelope;GO:0043231//intracellular membrane-bounded organelle;GO:0044424//intracel…	-	-
novel_circ_000495	miR7121-x	Bra012659	-	PREDICTED: plasminogen activator inhibitor 1 RNA-binding protein-like [Brassica rapa]	-	-	-	-	GO:0043227//membrane-bounded organelle;GO:0005623//cell;GO:0044424//intracellular part;GO:0043226//organelle;GO:0043231//intracellular membrane-bounded organelle;GO:0005737//cytoplasm;GO:0044464//cell part;GO:0044444//cytoplasmic part;GO:0005622//intracellular;GO:0042579//microbody;GO:0043229//intracellular organelle	-	-
novel_circ_000495	miR7121-x	Bra013008	-	BnaUnng00440D [Brassica napus]	-	-	-	-	-	-	-
novel_circ_000495	miR7121-x	Bra013568	Zmynd15	PREDICTED: zinc finger MYND domain-containing protein 15 [Brassica rapa]	-	-	-	-	-	-	-
novel_circ_000495	miR7121-x	Bra014364	ALA6	PREDICTED: phospholipid-transporting ATPase 6-like [Brassica rapa]	-	-	-	-	-	GO:0043167//ion binding;GO:0046914//transition metal ion binding;GO:0046872//metal ion binding;GO:0043169//cation binding;GO:0005488//binding	GO:0044763//single-organism cellular process;GO:0044699//single-organism process;GO:0006928//movement of cell or subcellular component;GO:0009987//cellular process
novel_circ_000495	miR7121-x	Bra015276	At1g65660	PREDICTED: pre-mRNA-splicing factor SLU7-A [Brassica rapa]	Genetic Information Processing	Transcription	ko03040//Spliceosome	K12819	-	-	-
novel_circ_000495	miR7121-x	Bra015290	SBT1.2	PREDICTED: subtilisin-like protease SBT1.2 [Brassica rapa]	-	-	-	-	GO:0071944//cell periphery;GO:0044464//cell part;GO:0005623//cell;GO:0005886//plasma membrane;GO:0016020//membrane	GO:0003824//catalytic activity;GO:0008233//peptidase activity;GO:0016787//hydrolase activity;GO:0004175//endopeptidase activity;GO:0070011//peptidase activity, acting on L-amino acid peptides	GO:0010467//gene expression;GO:0007275//multicellular organism development;GO:0032501//multicellular organismal process;GO:0032502//developmental process;GO:0016485//protein processing;GO:0019538//protein metabolic process;GO:0008283//cell proliferation;GO:0044699//single-organism process;GO:0071704//organic substance metabolic process;GO:0044767//single-organism developmental process;GO:0048856/…
novel_circ_000495	miR7121-x	Bra015482	RHON1	PREDICTED: rho-N domain-containing protein 1, chloroplastic [Brassica rapa]	-	-	-	-	-	-	-
novel_circ_000495	miR7121-x	Bra015708	HERC1	BnaA07g33160D [Brassica napus]	-	-	-	-	GO:0044424//intracellular part;GO:0044464//cell part;GO:0005623//cell;GO:0005622//intracellular	GO:0046872//metal ion binding;GO:0005515//protein binding;GO:0005488//binding;GO:0019899//enzyme binding;GO:0043169//cation binding;GO:0043167//ion binding;GO:0046914//transition metal ion binding;GO:0031267//small GTPase binding;GO:0017016//Ras GTPase binding;GO:0051020//GTPase binding	-
novel_circ_000495	miR7121-x	Bra015944	SSL11	PREDICTED: protein STRICTOSIDINE SYNTHASE-LIKE 12-like [Brassica rapa]	-	-	-	-	-	-	-
novel_circ_000495	miR7121-x	Bra016032	SLC25A44	PREDICTED: solute carrier family 25 member 44 [Brassica rapa]	-	-	-	-	GO:0044424//intracellular part;GO:0005622//intracellular;GO:0043226//organelle;GO:0043227//membrane-bounded organelle;GO:0044464//cell part;GO:0005623//cell;GO:0019866//organelle inner membrane;GO:0044446//intracellular organelle part;GO:0043229//intracellular organelle;GO:0044422//organelle part;GO:0031967//organelle envelope;GO:0031090//organelle membrane;GO:0031975//envelope;GO:0016020//membra…	-	GO:0051179//localization;GO:1902582//single-organism intracellular transport;GO:0051641//cellular localization;GO:0046907//intracellular transport;GO:0044765//single-organism transport;GO:0051234//establishment of localization;GO:0044699//single-organism process;GO:0051649//establishment of localization in cell;GO:1902578//single-organism localization;GO:0006810//transport
novel_circ_000495	miR7121-x	Bra017140	At3g09070	PREDICTED: UPF0503 protein At3g09070, chloroplastic [Brassica rapa]	-	-	-	-	GO:0005622//intracellular;GO:0044444//cytoplasmic part;GO:0043231//intracellular membrane-bounded organelle;GO:0009536//plastid;GO:0044464//cell part;GO:0005623//cell;GO:0043229//intracellular organelle;GO:0043227//membrane-bounded organelle;GO:0043226//organelle;GO:0005737//cytoplasm;GO:0016020//membrane;GO:0044424//intracellular part	-	-
novel_circ_000495	miR7121-x	Bra017400	CCAR1	PREDICTED: cell division cycle and apoptosis regulator protein 1 isoform X2 [Brassica rapa]	-	-	-	-	-	-	-
novel_circ_000495	miR7121-x	Bra019082	VTC2	PREDICTED: GDP-L-galactose phosphorylase 1-like [Brassica rapa]	Metabolism	Global and Overview;Carbohydrate metabolism	ko01100//Metabolic pathways;ko01110//Biosynthesis of secondary metabolites;ko00053//Ascorbate and aldarate metabolism	K14190	-	-	-
novel_circ_000495	miR7121-x	Bra019996	ULP2B	PREDICTED: probable ubiquitin-like-specific protease 2B isoform X1 [Brassica rapa]	-	-	-	-	-	-	-
novel_circ_000495	miR7121-x	Bra020503	-	BnaA02g31950D [Brassica napus]	-	-	-	-	GO:0044424//intracellular part;GO:0043229//intracellular organelle;GO:0044464//cell part;GO:0005623//cell;GO:0043231//intracellular membrane-bounded organelle;GO:0043227//membrane-bounded organelle;GO:0043226//organelle;GO:0005622//intracellular	-	-
novel_circ_000495	miR7121-x	Bra020538	GWD3	PREDICTED: phosphoglucan, water dikinase, chloroplastic-like [Brassica rapa]	-	-	-	-	-	-	-
novel_circ_000495	miR7121-x	Bra021087	-	BnaA06g19270D [Brassica napus]	Genetic Information Processing	Replication and repair	ko03420//Nucleotide excision repair;ko03440//Homologous recombination;ko03030//DNA replication;ko03430//Mismatch repair	K07466	-	-	-
novel_circ_000495	miR7121-x	Bra021088	-	BnaA06g19260D [Brassica napus]	-	-	-	-	-	-	-
novel_circ_000495	miR7121-x	Bra021880	SPL3	PREDICTED: squamosa promoter-binding-like protein 3 [Brassica rapa]	-	-	-	-	GO:0044424//intracellular part;GO:0005622//intracellular;GO:0043226//organelle;GO:0043231//intracellular membrane-bounded organelle;GO:0043229//intracellular organelle;GO:0044464//cell part;GO:0043227//membrane-bounded organelle;GO:0005623//cell	GO:0001071//nucleic acid binding transcription factor activity;GO:1901363//heterocyclic compound binding;GO:0005488//binding;GO:0097159//organic cyclic compound binding;GO:0003676//nucleic acid binding	GO:0009719//response to endogenous stimulus;GO:0016043//cellular component organization;GO:0090567//reproductive shoot system development;GO:0022414//reproductive process;GO:0048731//system development;GO:0050896//response to stimulus;GO:0042221//response to chemical;GO:0010050//vegetative phase change;GO:0000904//cell morphogenesis involved in differentiation;GO:0044707//single-multicellular org…
novel_circ_000495	miR7121-x	Bra022118	-	BnaAnng41950D [Brassica napus]	-	-	-	-	-	-	-
novel_circ_000495	miR7121-x	Bra022410	At1g49730	PREDICTED: probable receptor-like protein kinase At1g49730 [Brassica rapa]	-	-	-	-	GO:0016020//membrane	GO:0003824//catalytic activity;GO:0016740//transferase activity;GO:0016772//transferase activity, transferring phosphorus-containing groups	-
novel_circ_000495	miR7121-x	Bra024484	SLY1	PREDICTED: SEC1 family transport protein SLY1 [Brassica rapa]	-	-	-	-	GO:0044444//cytoplasmic part;GO:0044464//cell part;GO:0005623//cell;GO:0005622//intracellular;GO:0005737//cytoplasm;GO:0044424//intracellular part	-	GO:0006810//transport;GO:0009605//response to external stimulus;GO:0051179//localization;GO:0008104//protein localization;GO:0033036//macromolecule localization;GO:0009606//tropism;GO:0015031//protein transport;GO:0051234//establishment of localization;GO:0050896//response to stimulus;GO:0045184//establishment of protein localization;GO:0071702//organic substance transport
novel_circ_000495	miR7121-x	Bra025000	UBP21	PREDICTED: ubiquitin carboxyl-terminal hydrolase 21 [Brassica rapa]	-	-	-	-	-	-	-
novel_circ_000495	miR7121-x	Bra025721	RBOHE	PREDICTED: respiratory burst oxidase homolog protein E [Brassica rapa]	Organismal Systems	Environmental adaptation	ko04626//Plant-pathogen interaction	K13447	-	-	-
novel_circ_000495	miR7121-x	Bra025736	WAKL17	BnaA06g38500D [Brassica napus]	-	-	-	-	-	GO:0003824//catalytic activity;GO:0016740//transferase activity;GO:0016772//transferase activity, transferring phosphorus-containing groups	GO:0043412//macromolecule modification;GO:0044260//cellular macromolecule metabolic process;GO:0019538//protein metabolic process;GO:0071704//organic substance metabolic process;GO:0043170//macromolecule metabolic process;GO:0044238//primary metabolic process;GO:0036211//protein modification process;GO:0044237//cellular metabolic process;GO:0006464//cellular protein modification process;GO:000815…
novel_circ_000495	miR7121-x	Bra025756	CLH1	PREDICTED: chlorophyllase-1 [Brassica rapa]	Metabolism	Metabolism of cofactors and vitamins;Global and Overview	ko01100//Metabolic pathways;ko01110//Biosynthesis of secondary metabolites;ko00860//Porphyrin and chlorophyll metabolism	K08099	GO:0005623//cell;GO:0044464//cell part;GO:0044424//intracellular part;GO:0043226//organelle;GO:0043229//intracellular organelle;GO:0005622//intracellular;GO:0043231//intracellular membrane-bounded organelle;GO:0043227//membrane-bounded organelle	GO:0016788//hydrolase activity, acting on ester bonds;GO:0016787//hydrolase activity;GO:0052689//carboxylic ester hydrolase activity;GO:0003824//catalytic activity	GO:0036211//protein modification process;GO:0009605//response to external stimulus;GO:0034654//nucleobase-containing compound biosynthetic process;GO:0071704//organic substance metabolic process;GO:0043170//macromolecule metabolic process;GO:0043207//response to external biotic stimulus;GO:0016311//dephosphorylation;GO:0044249//cellular biosynthetic process;GO:0010033//response to organic substan…
novel_circ_000495	miR7121-x	Bra026886	At1g13780	BnaA09g46080D [Brassica napus]	-	-	-	-	-	-	-
novel_circ_000495	miR7121-x	Bra027413	F6'H1	PREDICTED: feruloyl CoA ortho-hydroxylase 1-like [Brassica napus]	-	-	-	-	-	-	-
novel_circ_000495	miR7121-x	Bra027414	-	PREDICTED: IQ domain-containing protein IQM2 [Brassica rapa]	-	-	-	-	GO:0044464//cell part;GO:0043226//organelle;GO:0005622//intracellular;GO:0043229//intracellular organelle;GO:0043227//membrane-bounded organelle;GO:0005623//cell;GO:0044424//intracellular part;GO:0043231//intracellular membrane-bounded organelle	-	-
novel_circ_000495	miR7121-x	Bra027555	CBDAS2	PREDICTED: cannabidiolic acid synthase-like 1 [Brassica rapa]	-	-	-	-	-	-	-
novel_circ_000495	miR7121-x	Bra027845	NUP98B	PREDICTED: nuclear pore complex protein NUP98B-like isoform X1 [Brassica rapa]	Genetic Information Processing	Translation	ko03013//RNA transport	K14297	-	-	-
novel_circ_000495	miR7121-x	Bra028607	-	BnaA02g00270D [Brassica napus]	-	-	-	-	GO:0016020//membrane;GO:0044464//cell part;GO:0043226//organelle;GO:0005622//intracellular;GO:0043231//intracellular membrane-bounded organelle;GO:0005623//cell;GO:0043227//membrane-bounded organelle;GO:0043229//intracellular organelle;GO:0044424//intracellular part	-	GO:0071704//organic substance metabolic process;GO:0044711//single-organism biosynthetic process;GO:0044237//cellular metabolic process;GO:0019637//organophosphate metabolic process;GO:0044238//primary metabolic process;GO:1901576//organic substance biosynthetic process;GO:0044255//cellular lipid metabolic process;GO:0009987//cellular process;GO:0046486//glycerolipid metabolic process;GO:0008654/…
novel_circ_000495	miR7121-x	Bra028693	GRP17	PREDICTED: uncharacterized transmembrane protein DDB_G0289901-like [Brassica rapa]	-	-	-	-	-	-	-
novel_circ_000495	miR7121-x	Bra029070	-	BnaC05g32660D [Brassica napus]	-	-	-	-	-	-	-
novel_circ_000495	miR7121-x	Bra029118	ZCCHC9	BnaA03g12630D [Brassica napus]	-	-	-	-	GO:0043227//membrane-bounded organelle;GO:0005623//cell;GO:0043231//intracellular membrane-bounded organelle;GO:0043229//intracellular organelle;GO:0043226//organelle;GO:0044464//cell part;GO:0005622//intracellular;GO:0044424//intracellular part	-	GO:0000003//reproduction;GO:0032502//developmental process;GO:0003006//developmental process involved in reproduction;GO:0022414//reproductive process
novel_circ_000495	miR7121-x	Bra029715	At5g15080	PREDICTED: probable receptor-like protein kinase At3g55450 [Brassica rapa]	-	-	-	-	-	GO:0016772//transferase activity, transferring phosphorus-containing groups;GO:0016740//transferase activity;GO:0003824//catalytic activity	GO:0009056//catabolic process;GO:0008152//metabolic process;GO:0044248//cellular catabolic process;GO:0009987//cellular process;GO:0044237//cellular metabolic process
novel_circ_000495	miR7121-x	Bra029780	RPL4A	PREDICTED: 60S ribosomal protein L4-1-like [Brassica rapa]	Genetic Information Processing	Translation	ko03010//Ribosome	K02930	-	-	-
novel_circ_000495	miR7121-x	Bra030122	At4g18596	PREDICTED: pollen-specific protein-like At4g18596 [Brassica rapa]	-	-	-	-	GO:0005576//extracellular region	-	GO:0000904//cell morphogenesis involved in differentiation;GO:0000902//cell morphogenesis;GO:0032989//cellular component morphogenesis;GO:0009987//cellular process;GO:0071840//cellular component organization or biogenesis;GO:0071555//cell wall organization;GO:0016043//cellular component organization;GO:0071669//plant-type cell wall organization or biogenesis;GO:0009664//plant-type cell wall organ…
novel_circ_000495	miR7121-x	Bra030520	Prpf18	PREDICTED: pre-mRNA-splicing factor 18 [Brassica rapa]	Genetic Information Processing	Transcription	ko03040//Spliceosome	K12817	-	-	-
novel_circ_000495	miR7121-x	Bra031951	-	PREDICTED: pyruvate kinase, cytosolic isozyme [Brassica rapa]	Metabolism	Nucleotide metabolism;Global and Overview;Carbohydrate metabolism	ko01100//Metabolic pathways;ko01110//Biosynthesis of secondary metabolites;ko01130//Biosynthesis of antibiotics;ko01120//Microbial metabolism in diverse environments;ko01200//Carbon metabolism;ko01230//Biosynthesis of amino acids;ko00230//Purine metabolism;ko00010//Glycolysis / Gluconeogenesis;ko00620//Pyruvate metabolism	K00873	-	-	-
novel_circ_000495	miR7121-x	Bra032170	FPP7	PREDICTED: filament-like plant protein 7 [Brassica rapa]	-	-	-	-	-	-	-
novel_circ_000495	miR7121-x	Bra032254	AGO1	PREDICTED: protein argonaute 1-like [Brassica rapa]	-	-	-	-	-	-	-
novel_circ_000495	miR7121-x	Bra032290	At4g18596	PREDICTED: pollen-specific protein-like At4g18596 [Brassica rapa]	-	-	-	-	GO:0005576//extracellular region	-	GO:0071840//cellular component organization or biogenesis;GO:0000904//cell morphogenesis involved in differentiation;GO:0032502//developmental process;GO:0044763//single-organism cellular process;GO:0048468//cell development;GO:0048856//anatomical structure development;GO:0009664//plant-type cell wall organization;GO:0048869//cellular developmental process;GO:0009653//anatomical structure morphog…
novel_circ_000495	miR7121-x	Bra032556	Prpf18	PREDICTED: pre-mRNA-splicing factor 18-like [Brassica rapa]	Genetic Information Processing	Transcription	ko03040//Spliceosome	K12817	-	-	-
novel_circ_000495	miR7121-x	Bra032706	-	BnaCnng29040D [Brassica napus]	-	-	-	-	-	-	-
novel_circ_000495	miR7121-x	Bra033700	At5g43822	Pentatricopeptide repeat (PPR) superfamily protein [Arabidopsis thaliana]	-	-	-	-	GO:0043226//organelle;GO:0005622//intracellular;GO:0043229//intracellular organelle;GO:0044424//intracellular part;GO:0043231//intracellular membrane-bounded organelle;GO:0043227//membrane-bounded organelle;GO:0044464//cell part;GO:0005623//cell	-	-
novel_circ_000495	miR7121-x	Bra033740	-	PREDICTED: tetrahydrocannabinolic acid synthase [Brassica rapa]	-	-	-	-	-	-	-
novel_circ_000495	miR7121-x	Bra034075	RPL4A	PREDICTED: 60S ribosomal protein L4-1 [Brassica rapa]	Genetic Information Processing	Translation	ko03010//Ribosome	K02930	-	-	-
novel_circ_000495	miR7121-x	Bra034128	SIR	PREDICTED: assimilatory sulfite reductase (ferredoxin), chloroplastic-like [Brassica rapa]	Metabolism	Global and Overview;Energy metabolism	ko01100//Metabolic pathways;ko01120//Microbial metabolism in diverse environments;ko00920//Sulfur metabolism	K00392	GO:0043226//organelle;GO:0043229//intracellular organelle;GO:0044464//cell part;GO:0044435//plastid part;GO:0044446//intracellular organelle part;GO:0005622//intracellular;GO:0031975//envelope;GO:0031967//organelle envelope;GO:0005623//cell;GO:0044422//organelle part;GO:0044424//intracellular part;GO:0009532//plastid stroma;GO:0043227//membrane-bounded organelle;GO:0005737//cytoplasm;GO:0009536//…	GO:0043169//cation binding;GO:0043167//ion binding;GO:0003824//catalytic activity;GO:0046914//transition metal ion binding;GO:0046872//metal ion binding;GO:0016491//oxidoreductase activity;GO:0016673//oxidoreductase activity, acting on a sulfur group of donors, iron-sulfur protein as acceptor;GO:0016667//oxidoreductase activity, acting on a sulfur group of donors;GO:0005488//binding	GO:0071840//cellular component organization or biogenesis;GO:0008152//metabolic process;GO:0009987//cellular process;GO:0009850//auxin metabolic process;GO:0050896//response to stimulus;GO:0009628//response to abiotic stimulus;GO:1901564//organonitrogen compound metabolic process;GO:0010038//response to metal ion;GO:0042221//response to chemical;GO:0019752//carboxylic acid metabolic process;GO:00…
novel_circ_000495	miR7121-x	Bra034381	IDM1	BnaA04g16170D [Brassica napus]	-	-	-	-	-	-	-
novel_circ_000495	miR7121-x	Bra034458	AIG1	PREDICTED: protein AIG1-like isoform X1 [Brassica rapa]	-	-	-	-	-	-	-
novel_circ_000495	miR7121-x	Bra034463	-	PREDICTED: uncharacterized abhydrolase domain-containing protein DDB_G0269086-like [Brassica oleracea var. oleracea] [Brassica oleracea]	-	-	-	-	-	-	-
novel_circ_000495	miR7121-x	Bra034643	RPS3AB	PREDICTED: 40S ribosomal protein S3a-2-like [Brassica rapa]	Genetic Information Processing	Translation	ko03010//Ribosome	K02984	-	-	-
novel_circ_000495	miR7121-x	Bra034931	GLR3.3	PREDICTED: glutamate receptor 3.3 isoform X1 [Brassica rapa]	-	-	-	-	-	GO:0004872//receptor activity;GO:0015075//ion transmembrane transporter activity;GO:0005215//transporter activity;GO:0022857//transmembrane transporter activity;GO:0005261//cation channel activity;GO:0015267//channel activity;GO:0005216//ion channel activity;GO:0060089//molecular transducer activity;GO:0022803//passive transmembrane transporter activity;GO:0022892//substrate-specific transporter …	GO:0030001//metal ion transport;GO:0009314//response to radiation;GO:0010243//response to organonitrogen compound;GO:0006812//cation transport;GO:0065008//regulation of biological quality;GO:0055065//metal ion homeostasis;GO:0010033//response to organic substance;GO:0051234//establishment of localization;GO:0006950//response to stress;GO:0009605//response to external stimulus;GO:0006811//ion tran…
novel_circ_000495	miR7121-x	Bra035023	QUA2	PREDICTED: probable pectin methyltransferase QUA2 [Brassica rapa]	-	-	-	-	-	-	-
novel_circ_000495	miR7121-x	Bra035633	GATA21	PREDICTED: GATA transcription factor 21-like [Brassica rapa]	-	-	-	-	-	-	-
novel_circ_000495	miR7121-x	Bra036259	GSTF3	PREDICTED: glutathione S-transferase F3-like [Brassica rapa]	Metabolism	Metabolism of other amino acids	ko00480//Glutathione metabolism	K00799	GO:0016020//membrane;GO:0044464//cell part;GO:0005622//intracellular;GO:0044424//intracellular part;GO:0005623//cell	GO:0003824//catalytic activity	GO:0009987//cellular process;GO:0043207//response to external biotic stimulus;GO:0044699//single-organism process;GO:0009607//response to biotic stimulus;GO:0044710//single-organism metabolic process;GO:0051707//response to other organism;GO:0008152//metabolic process;GO:0051704//multi-organism process;GO:0009605//response to external stimulus;GO:0009620//response to fungus;GO:0044763//single-org…
novel_circ_000495	miR7121-x	Bra036260	GSTF3	PREDICTED: glutathione S-transferase F3 [Brassica rapa]	Metabolism	Metabolism of other amino acids	ko00480//Glutathione metabolism	K00799	GO:0005623//cell;GO:0016020//membrane;GO:0005622//intracellular;GO:0044424//intracellular part;GO:0044464//cell part	GO:0003824//catalytic activity	GO:0050896//response to stimulus;GO:0019748//secondary metabolic process;GO:0044710//single-organism metabolic process;GO:0009605//response to external stimulus;GO:0051704//multi-organism process;GO:0009620//response to fungus;GO:0009607//response to biotic stimulus;GO:0044699//single-organism process;GO:0043207//response to external biotic stimulus;GO:0009404//toxin metabolic process;GO:0044763/…
novel_circ_000495	miR7121-x	Bra036269	LECRK43	PREDICTED: L-type lectin-domain containing receptor kinase IV.4-like, partial [Brassica rapa]	-	-	-	-	-	-	-
novel_circ_000495	miR7121-x	Bra036427	At5g18180	BnaA01g33870D [Brassica napus]	Genetic Information Processing	Translation	ko03008//Ribosome biogenesis in eukaryotes	K11128	GO:0044434//chloroplast part;GO:0044444//cytoplasmic part;GO:0043231//intracellular membrane-bounded organelle;GO:0005623//cell;GO:0044428//nuclear part;GO:0009579//thylakoid;GO:0005622//intracellular;GO:0009534//chloroplast thylakoid;GO:0043233//organelle lumen;GO:0005634//nucleus;GO:0043229//intracellular organelle;GO:0009507//chloroplast;GO:0031974//membrane-enclosed lumen;GO:0031976//plastid …	-	GO:0006810//transport;GO:0051649//establishment of localization in cell;GO:0044744//protein targeting to nucleus;GO:0051170//nuclear import;GO:0046483//heterocycle metabolic process;GO:0071702//organic substance transport;GO:0006913//nucleocytoplasmic transport;GO:0051276//chromosome organization;GO:0044707//single-multicellular organism process;GO:0016070//RNA metabolic process;GO:0019538//prote…
novel_circ_000495	miR7121-x	Bra036567	Slc25a44	PREDICTED: solute carrier family 25 member 44-like [Brassica rapa]	-	-	-	-	GO:0005623//cell;GO:0031967//organelle envelope;GO:0019866//organelle inner membrane;GO:0043226//organelle;GO:0044446//intracellular organelle part;GO:0031975//envelope;GO:0031090//organelle membrane;GO:0044422//organelle part;GO:0005622//intracellular;GO:0044464//cell part;GO:0043227//membrane-bounded organelle;GO:0043229//intracellular organelle;GO:0016020//membrane;GO:0044424//intracellular pa…	-	GO:1902578//single-organism localization;GO:0051641//cellular localization;GO:0044699//single-organism process;GO:0051649//establishment of localization in cell;GO:1902582//single-organism intracellular transport;GO:0051234//establishment of localization;GO:0051179//localization;GO:0044765//single-organism transport;GO:0046907//intracellular transport;GO:0006810//transport
novel_circ_000495	miR7121-x	Bra037601	CHR4	PREDICTED: DDT domain-containing protein PTM [Brassica rapa]	-	-	-	-	-	-	-
novel_circ_000495	miR7121-x	Bra039051	SBT1.7	BnaAnng18730D [Brassica napus]	-	-	-	-	-	-	-
novel_circ_000495	miR7121-x	Bra039172	At3g02360	PREDICTED: 6-phosphogluconate dehydrogenase, decarboxylating 3 [Brassica rapa]	Metabolism	Global and Overview;Metabolism of other amino acids;Carbohydrate metabolism	ko01100//Metabolic pathways;ko01110//Biosynthesis of secondary metabolites;ko01130//Biosynthesis of antibiotics;ko01120//Microbial metabolism in diverse environments;ko01200//Carbon metabolism;ko00480//Glutathione metabolism;ko00030//Pentose phosphate pathway	K00033	GO:0009532//plastid stroma;GO:0043226//organelle;GO:0005623//cell;GO:0005737//cytoplasm;GO:0043227//membrane-bounded organelle;GO:0044464//cell part;GO:0044446//intracellular organelle part;GO:0044444//cytoplasmic part;GO:0044424//intracellular part;GO:0044435//plastid part;GO:0042579//microbody;GO:0005622//intracellular;GO:0043231//intracellular membrane-bounded organelle;GO:0009536//plastid;GO:…	-	GO:0006950//response to stress;GO:0015849//organic acid transport;GO:0016482//cytoplasmic transport;GO:0034765//regulation of ion transmembrane transport;GO:0046907//intracellular transport;GO:0006820//anion transport;GO:0009746//response to hexose;GO:0032879//regulation of localization;GO:0006811//ion transport;GO:0044699//single-organism process;GO:0034762//regulation of transmembrane transport…
novel_circ_000495	miR7121-x	Bra039569	-	BnaA01g18800D [Brassica napus]	-	-	-	-	-	-	-
novel_circ_000495	miR7121-x	Bra040056	ATPK2	BnaA01g32300D [Brassica napus]	-	-	-	-	GO:0044464//cell part;GO:0043229//intracellular organelle;GO:0044424//intracellular part;GO:0005623//cell;GO:0005622//intracellular;GO:0043226//organelle;GO:0043227//membrane-bounded organelle;GO:0043231//intracellular membrane-bounded organelle	GO:0016301//kinase activity;GO:0016772//transferase activity, transferring phosphorus-containing groups;GO:0003824//catalytic activity;GO:0016740//transferase activity	GO:0044699//single-organism process;GO:0042221//response to chemical;GO:0044260//cellular macromolecule metabolic process;GO:0006952//defense response;GO:0034641//cellular nitrogen compound metabolic process;GO:0009719//response to endogenous stimulus;GO:0050789//regulation of biological process;GO:0050896//response to stimulus;GO:0006950//response to stress;GO:0008104//protein localization;GO:00…
novel_circ_000495	miR7121-x	Bra040153	NAC100	PREDICTED: NAC domain-containing protein 79-like isoform X2 [Brassica rapa]	-	-	-	-	-	GO:0001071//nucleic acid binding transcription factor activity	GO:0009408//response to heat;GO:0044707//single-multicellular organism process;GO:0044699//single-organism process;GO:0006950//response to stress;GO:0009266//response to temperature stimulus;GO:0009628//response to abiotic stimulus;GO:0032501//multicellular organismal process;GO:0050896//response to stimulus
novel_circ_000495	miR7121-x	Bra040161	-	PREDICTED: H/ACA ribonucleoprotein complex subunit 1-like [Brassica rapa]	-	-	-	-	GO:0044424//intracellular part;GO:0043226//organelle;GO:0043231//intracellular membrane-bounded organelle;GO:0005622//intracellular;GO:0043227//membrane-bounded organelle;GO:0042579//microbody;GO:0005623//cell;GO:0044444//cytoplasmic part;GO:0043229//intracellular organelle;GO:0044464//cell part;GO:0005737//cytoplasm	-	-
novel_circ_000495	miR5656-y	Bra000060	AGT3	PREDICTED: alanine--glyoxylate aminotransferase 2 homolog 2, mitochondrial [Brassica rapa]	Metabolism	Global and Overview;Amino acid metabolism	ko01100//Metabolic pathways;ko01110//Biosynthesis of secondary metabolites;ko00270//Cysteine and methionine metabolism;ko00260//Glycine, serine and threonine metabolism;ko00280//Valine, leucine and isoleucine degradation;ko00250//Alanine, aspartate and glutamate metabolism	K00827	-	GO:0016740//transferase activity;GO:0016769//transferase activity, transferring nitrogenous groups;GO:0008483//transaminase activity;GO:0003824//catalytic activity	-
novel_circ_000495	miR5656-y	Bra000226	Haus1	PREDICTED: AUGMIN subunit 1 [Brassica rapa]	-	-	-	-	-	-	-
novel_circ_000495	miR5656-y	Bra000561	PAPD5	BnaC03g27000D [Brassica napus]	-	-	-	-	-	-	-
novel_circ_000495	miR5656-y	Bra000824	STA1	PREDICTED: protein STABILIZED1-like [Brassica rapa]	Genetic Information Processing	Transcription	ko03040//Spliceosome	K12855	GO:0044464//cell part;GO:0043227//membrane-bounded organelle;GO:0043226//organelle;GO:0005623//cell;GO:0043229//intracellular organelle;GO:0005622//intracellular;GO:0044424//intracellular part;GO:0043231//intracellular membrane-bounded organelle	-	GO:0006950//response to stress;GO:0050896//response to stimulus
novel_circ_000495	miR5656-y	Bra001918	A6	PREDICTED: probable glucan endo-1,3-beta-glucosidase A6 [Brassica rapa]	-	-	-	-	-	-	-
novel_circ_000495	miR5656-y	Bra002034	EXL5	PREDICTED: protein EXORDIUM-like 5 [Brassica rapa]	-	-	-	-	-	-	-
novel_circ_000495	miR5656-y	Bra002101	grpE	PREDICTED: protein GrpE-like [Brassica napus]	-	-	-	-	-	-	-
novel_circ_000495	miR5656-y	Bra002214	BG	PREDICTED: basic 7S globulin 2 [Brassica rapa]	-	-	-	-	-	-	-
novel_circ_000495	miR5656-y	Bra003054	KPNB1	PREDICTED: importin subunit beta-1 [Brassica rapa]	Genetic Information Processing	Translation	ko03013//RNA transport	K14293	-	-	-
novel_circ_000495	miR5656-y	Bra003372	SLC35F1	PREDICTED: solute carrier family 35 member F1-like [Brassica rapa]	-	-	-	-	-	-	-
novel_circ_000495	miR5656-y	Bra003802	FUT3	PREDICTED: fucosyltransferase 3 [Brassica rapa]	-	-	-	-	-	GO:0016758//transferase activity, transferring hexosyl groups;GO:0016757//transferase activity, transferring glycosyl groups;GO:0016740//transferase activity;GO:0003824//catalytic activity	-
novel_circ_000495	miR5656-y	Bra004424	GRXC13	PREDICTED: glutaredoxin-C13 [Brassica rapa]	-	-	-	-	-	GO:0030611//arsenate reductase activity;GO:0016491//oxidoreductase activity;GO:0003824//catalytic activity	GO:0000003//reproduction;GO:0032502//developmental process;GO:0003006//developmental process involved in reproduction;GO:0022414//reproductive process
novel_circ_000495	miR5656-y	Bra004676	TBCCD1	BnaA05g02700D [Brassica napus]	-	-	-	-	-	-	-
novel_circ_000495	miR5656-y	Bra005100	-	BnaA02g21460D [Brassica napus]	-	-	-	-	-	-	-
novel_circ_000495	miR5656-y	Bra005111	AGT3	PREDICTED: alanine--glyoxylate aminotransferase 2 homolog 2, mitochondrial [Brassica rapa]	Metabolism	Global and Overview;Amino acid metabolism	ko01100//Metabolic pathways;ko01110//Biosynthesis of secondary metabolites;ko00270//Cysteine and methionine metabolism;ko00260//Glycine, serine and threonine metabolism;ko00280//Valine, leucine and isoleucine degradation;ko00250//Alanine, aspartate and glutamate metabolism	K00827	-	GO:0016740//transferase activity;GO:0003824//catalytic activity;GO:0008483//transaminase activity;GO:0016769//transferase activity, transferring nitrogenous groups	-
novel_circ_000495	miR5656-y	Bra005947	At5g07610	PREDICTED: F-box protein At5g07610 [Brassica rapa]	-	-	-	-	GO:0043229//intracellular organelle;GO:0044464//cell part;GO:0043226//organelle;GO:0005622//intracellular;GO:0044424//intracellular part;GO:0043231//intracellular membrane-bounded organelle;GO:0043227//membrane-bounded organelle;GO:0005623//cell	-	-
novel_circ_000495	miR5656-y	Bra006347	TRAPPC8	PREDICTED: trafficking protein particle complex subunit 8-like [Brassica rapa]	-	-	-	-	-	-	-
novel_circ_000495	miR5656-y	Bra007022	CHX20	PREDICTED: cation/H(+) antiporter 20-like [Brassica rapa]	-	-	-	-	GO:0044424//intracellular part;GO:0043229//intracellular organelle;GO:0043226//organelle;GO:0043227//membrane-bounded organelle;GO:0005623//cell;GO:0043231//intracellular membrane-bounded organelle;GO:0044464//cell part;GO:0005622//intracellular	GO:0022804//active transmembrane transporter activity;GO:0022890//inorganic cation transmembrane transporter activity;GO:0022857//transmembrane transporter activity;GO:0015077//monovalent inorganic cation transmembrane transporter activity;GO:0022891//substrate-specific transmembrane transporter activity;GO:0015299//solute:proton antiporter activity;GO:0015298//solute:cation antiporter activity;G…	GO:0051641//cellular localization;GO:0044699//single-organism process;GO:0051649//establishment of localization in cell;GO:1902578//single-organism localization;GO:0046907//intracellular transport;GO:1902582//single-organism intracellular transport;GO:0045184//establishment of protein localization;GO:0009987//cellular process;GO:0006811//ion transport;GO:0034613//cellular protein localization;GO:…
novel_circ_000495	miR5656-y	Bra007387	At3g58370	BnaA09g37340D [Brassica napus]	-	-	-	-	-	-	-
novel_circ_000495	miR5656-y	Bra007388	At3g58370	PREDICTED: MATH domain and coiled-coil domain-containing protein At3g58370-like [Brassica rapa]	-	-	-	-	GO:0043231//intracellular membrane-bounded organelle;GO:0043227//membrane-bounded organelle;GO:0043229//intracellular organelle;GO:0005623//cell;GO:0044464//cell part;GO:0005622//intracellular;GO:0043226//organelle;GO:0044424//intracellular part	-	-
novel_circ_000495	miR5656-y	Bra007389	At3g58370	PREDICTED: MATH domain and coiled-coil domain-containing protein At3g58370-like [Brassica rapa]	-	-	-	-	GO:0043231//intracellular membrane-bounded organelle;GO:0043229//intracellular organelle;GO:0043227//membrane-bounded organelle;GO:0005622//intracellular;GO:0005623//cell;GO:0044424//intracellular part;GO:0043226//organelle;GO:0044464//cell part	-	-
novel_circ_000495	miR5656-y	Bra008895	UVR8	BnaA10g20350D [Brassica napus]	-	-	-	-	-	-	-
novel_circ_000495	miR5656-y	Bra010056	-	PREDICTED: uncharacterized abhydrolase domain-containing protein DDB_G0269086-like [Brassica napus]	-	-	-	-	-	-	-
novel_circ_000495	miR5656-y	Bra010573	ATHB-40	PREDICTED: homeobox-leucine zipper protein ATHB-40-like [Brassica napus]	-	-	-	-	-	-	-
novel_circ_000495	miR5656-y	Bra010684	BRI1	PREDICTED: protein BRASSINOSTEROID INSENSITIVE 1-like [Brassica rapa]	Environmental Information Processing	Signal transduction	ko04075//Plant hormone signal transduction	K13415	-	-	-
novel_circ_000495	miR5656-y	Bra011339	-	PREDICTED: zinc finger protein ZIC 2 isoform X2 [Brassica oleracea var. oleracea] [Brassica oleracea]	-	-	-	-	-	-	GO:0044767//single-organism developmental process;GO:0044763//single-organism cellular process;GO:1901360//organic cyclic compound metabolic process;GO:0009059//macromolecule biosynthetic process;GO:0046483//heterocycle metabolic process;GO:0009987//cellular process;GO:0048869//cellular developmental process;GO:0090304//nucleic acid metabolic process;GO:0006351//transcription, DNA-templated;GO:00…
novel_circ_000495	miR5656-y	Bra014466	BIG2	PREDICTED: brefeldin A-inhibited guanine nucleotide-exchange protein 2 [Brassica rapa]	Cellular Processes	Transport and catabolism	ko04144//Endocytosis	K18442	GO:0005737//cytoplasm;GO:0044444//cytoplasmic part;GO:0005623//cell;GO:0044424//intracellular part;GO:0044464//cell part;GO:0005622//intracellular	-	-
novel_circ_000495	miR5656-y	Bra014700	-	BnaCnng27680D [Brassica napus]	-	-	-	-	-	-	-
novel_circ_000495	miR5656-y	Bra015657	RPS13	PREDICTED: small ribosomal subunit protein S13, mitochondrial [Brassica rapa]	Genetic Information Processing	Translation	ko03010//Ribosome	K02952	GO:0044464//cell part;GO:0044391//ribosomal subunit;GO:0043227//membrane-bounded organelle;GO:0044446//intracellular organelle part;GO:0030529//intracellular ribonucleoprotein complex;GO:1990904//ribonucleoprotein complex;GO:0005622//intracellular;GO:0043226//organelle;GO:0009536//plastid;GO:0000313//organellar ribosome;GO:0043231//intracellular membrane-bounded organelle;GO:0044444//cytoplasmic …	-	GO:0046483//heterocycle metabolic process;GO:0008152//metabolic process;GO:1901360//organic cyclic compound metabolic process;GO:0044260//cellular macromolecule metabolic process;GO:0097659//nucleic acid-templated transcription;GO:0009058//biosynthetic process;GO:0032774//RNA biosynthetic process;GO:0034645//cellular macromolecule biosynthetic process;GO:0043170//macromolecule metabolic process;G…
novel_circ_000495	miR5656-y	Bra015924	At1g74260	PREDICTED: probable phosphoribosylformylglycinamidine synthase, chloroplastic/mitochondrial [Brassica rapa]	Metabolism	Global and Overview;Nucleotide metabolism	ko01100//Metabolic pathways;ko01110//Biosynthesis of secondary metabolites;ko01130//Biosynthesis of antibiotics;ko00230//Purine metabolism	K01952	-	-	-
novel_circ_000495	miR5656-y	Bra016412	SECA2	BnaA08g21240D [Brassica napus]	Genetic Information Processing	Folding, sorting and degradation	ko03060//Protein export	K03070	-	-	-
novel_circ_000495	miR5656-y	Bra016709	FUT6	PREDICTED: probable fucosyltransferase 8 [Brassica rapa]	-	-	-	-	-	GO:0003824//catalytic activity;GO:0016757//transferase activity, transferring glycosyl groups;GO:0016740//transferase activity;GO:0016758//transferase activity, transferring hexosyl groups	-
novel_circ_000495	miR5656-y	Bra017322	PLL1	PREDICTED: protein phosphatase 2C 29-like [Brassica rapa]	-	-	-	-	-	-	-
novel_circ_000495	miR5656-y	Bra018577	PCMP-E70	PREDICTED: pentatricopeptide repeat-containing protein At1g09190 [Brassica rapa]	-	-	-	-	-	-	-
novel_circ_000495	miR5656-y	Bra018949	-	BnaA06g01930D [Brassica napus]	-	-	-	-	-	-	-
novel_circ_000495	miR5656-y	Bra019321	CRK15	PREDICTED: cysteine-rich receptor-like protein kinase 15 [Brassica oleracea var. oleracea] [Brassica oleracea]	-	-	-	-	-	GO:0016772//transferase activity, transferring phosphorus-containing groups;GO:0003824//catalytic activity;GO:0016740//transferase activity	-
novel_circ_000495	miR5656-y	Bra019973	TGA4	PREDICTED: transcription factor TGA1-like [Brassica rapa]	-	-	-	-	GO:0043229//intracellular organelle;GO:0043226//organelle;GO:0044464//cell part;GO:0005622//intracellular;GO:0043227//membrane-bounded organelle;GO:0043231//intracellular membrane-bounded organelle;GO:0044424//intracellular part;GO:0005623//cell	-	-
novel_circ_000495	miR5656-y	Bra020635	smek1	PREDICTED: serine/threonine-protein phosphatase 4 regulatory subunit 3-like [Brassica rapa]	-	-	-	-	-	-	-
novel_circ_000495	miR5656-y	Bra022729	CHX20	PREDICTED: cation/H(+) antiporter 20-like [Brassica rapa]	-	-	-	-	GO:0005622//intracellular;GO:0044464//cell part;GO:0043227//membrane-bounded organelle;GO:0044424//intracellular part;GO:0043231//intracellular membrane-bounded organelle;GO:0043226//organelle;GO:0005623//cell;GO:0043229//intracellular organelle	GO:0015291//secondary active transmembrane transporter activity;GO:0015297//antiporter activity;GO:0099516//ion antiporter activity;GO:0008324//cation transmembrane transporter activity;GO:0015491//cation:cation antiporter activity;GO:0015077//monovalent inorganic cation transmembrane transporter activity;GO:0015299//solute:proton antiporter activity;GO:0022857//transmembrane transporter activity…	GO:0045184//establishment of protein localization;GO:0030001//metal ion transport;GO:0044699//single-organism process;GO:0051641//cellular localization;GO:0051179//localization;GO:0033036//macromolecule localization;GO:0044763//single-organism cellular process;GO:0034613//cellular protein localization;GO:0065007//biological regulation;GO:0009987//cellular process;GO:0006886//intracellular protein…
novel_circ_000495	miR5656-y	Bra023119	nipblb	BnaC05g23890D [Brassica napus]	-	-	-	-	-	-	-
novel_circ_000495	miR5656-y	Bra023382	-	BnaA02g01310D [Brassica napus]	-	-	-	-	GO:0043231//intracellular membrane-bounded organelle;GO:0044464//cell part;GO:0005622//intracellular;GO:0043226//organelle;GO:0043227//membrane-bounded organelle;GO:0043229//intracellular organelle;GO:0044424//intracellular part;GO:0005623//cell	-	GO:0009719//response to endogenous stimulus;GO:0050896//response to stimulus;GO:0042221//response to chemical;GO:0010033//response to organic substance;GO:0009725//response to hormone
novel_circ_000495	miR5656-y	Bra025329	ABCB16	PREDICTED: ABC transporter B family member 22-like isoform X2 [Brassica napus]	Environmental Information Processing	Membrane transport	ko02010//ABC transporters	K05658	-	-	-
novel_circ_000495	miR5656-y	Bra025410	MYB48	PREDICTED: myb-related protein 305 [Brassica rapa]	-	-	-	-	GO:0005622//intracellular;GO:0043229//intracellular organelle;GO:0005623//cell;GO:0044464//cell part;GO:0044424//intracellular part;GO:0043227//membrane-bounded organelle;GO:0043226//organelle;GO:0043231//intracellular membrane-bounded organelle	GO:0001071//nucleic acid binding transcription factor activity	GO:0044271//cellular nitrogen compound biosynthetic process;GO:0050896//response to stimulus;GO:0009058//biosynthetic process;GO:1901360//organic cyclic compound metabolic process;GO:0090304//nucleic acid metabolic process;GO:0044249//cellular biosynthetic process;GO:0009059//macromolecule biosynthetic process;GO:0034641//cellular nitrogen compound metabolic process;GO:1901362//organic cyclic com…
novel_circ_000495	miR5656-y	Bra026508	CYP705A20	PREDICTED: cytochrome P450 705A5-like [Brassica rapa]	-	-	-	-	-	GO:0005488//binding	-
novel_circ_000495	miR5656-y	Bra027083	CAB8	PREDICTED: photosystem I chlorophyll a/b-binding protein 3-1, chloroplastic [Brassica rapa]	Metabolism	Energy metabolism	ko00196//Photosynthesis - antenna proteins	K08909	GO:0043227//membrane-bounded organelle;GO:0044422//organelle part;GO:0031984//organelle subcompartment;GO:0043234//protein complex;GO:0043226//organelle;GO:0044434//chloroplast part;GO:0043229//intracellular organelle;GO:0044424//intracellular part;GO:0005622//intracellular;GO:0009507//chloroplast;GO:0044464//cell part;GO:0009532//plastid stroma;GO:0009579//thylakoid;GO:0044446//intracellular org…	GO:0097159//organic cyclic compound binding;GO:0046906//tetrapyrrole binding;GO:1901363//heterocyclic compound binding;GO:0005488//binding	GO:1901564//organonitrogen compound metabolic process;GO:0008652//cellular amino acid biosynthetic process;GO:1901566//organonitrogen compound biosynthetic process;GO:0044249//cellular biosynthetic process;GO:0044699//single-organism process;GO:0044272//sulfur compound biosynthetic process;GO:0008152//metabolic process;GO:0044238//primary metabolic process;GO:0044763//single-organism cellular pro…
novel_circ_000495	miR5656-y	Bra028343	A6	PREDICTED: probable glucan endo-1,3-beta-glucosidase A6 [Brassica rapa]	-	-	-	-	-	-	-
novel_circ_000495	miR5656-y	Bra028913	HT1	PREDICTED: serine/threonine-protein kinase HT1 isoform X1 [Brassica rapa]	-	-	-	-	-	-	-
novel_circ_000495	miR5656-y	Bra029938	WSD1	BnaA01g20700D [Brassica napus]	-	-	-	-	-	-	GO:0044710//single-organism metabolic process;GO:0044765//single-organism transport;GO:0006811//ion transport;GO:0001101//response to acid chemical;GO:0051234//establishment of localization;GO:0009404//toxin metabolic process;GO:0015698//inorganic anion transport;GO:0050896//response to stimulus;GO:0046942//carboxylic acid transport;GO:0071702//organic substance transport;GO:0044767//single-organ…
novel_circ_000495	miR5656-y	Bra031515	CNGC11	PREDICTED: cyclic nucleotide-gated ion channel 11-like [Brassica rapa]	Organismal Systems	Environmental adaptation	ko04626//Plant-pathogen interaction	K05391	GO:0016020//membrane	GO:1901265//nucleoside phosphate binding;GO:0097159//organic cyclic compound binding;GO:1901363//heterocyclic compound binding;GO:0036094//small molecule binding;GO:0000166//nucleotide binding;GO:0005488//binding;GO:0005515//protein binding	-
novel_circ_000495	miR5656-y	Bra031864	AGL93	PREDICTED: agamous-like MADS-box protein AGL93 [Brassica napus]	-	-	-	-	-	-	-
novel_circ_000495	miR5656-y	Bra033093	-	BnaA02g29780D [Brassica napus]	-	-	-	-	-	GO:0016740//transferase activity;GO:0019787//ubiquitin-like protein transferase activity;GO:0003824//catalytic activity	-
novel_circ_000495	miR5656-y	Bra033107	At3g29680	PREDICTED: BAHD acyltransferase At3g29680-like [Brassica rapa]	-	-	-	-	-	-	-
novel_circ_000495	miR5656-y	Bra033777	SIS3	PREDICTED: E3 ubiquitin-protein ligase SIS3 [Brassica rapa]	-	-	-	-	-	-	-
novel_circ_000495	miR5656-y	Bra035323	DIR2	PREDICTED: dirigent protein 2 [Brassica rapa]	-	-	-	-	-	-	-
novel_circ_000495	miR5656-y	Bra035804	dVPE	PREDICTED: vacuolar-processing enzyme delta-isozyme isoform X1 [Brassica rapa]	-	-	-	-	GO:0009536//plastid;GO:0044444//cytoplasmic part;GO:0005576//extracellular region;GO:0044464//cell part;GO:0043226//organelle;GO:0043227//membrane-bounded organelle;GO:0043229//intracellular organelle;GO:0044421//extracellular region part;GO:0005737//cytoplasm;GO:0005622//intracellular;GO:0005623//cell;GO:0043231//intracellular membrane-bounded organelle;GO:0044424//intracellular part	GO:0003824//catalytic activity;GO:0070011//peptidase activity, acting on L-amino acid peptides;GO:0008233//peptidase activity;GO:0016787//hydrolase activity;GO:0004175//endopeptidase activity	GO:0044763//single-organism cellular process;GO:0071396//cellular response to lipid;GO:0009987//cellular process;GO:0006721//terpenoid metabolic process;GO:0006508//proteolysis;GO:0032502//developmental process;GO:0065007//biological regulation;GO:0009755//hormone-mediated signaling pathway;GO:0006082//organic acid metabolic process;GO:0001101//response to acid chemical;GO:0044255//cellular lipid…
novel_circ_000495	miR5656-y	Bra037307	At5g07670	BnaAnng20470D [Brassica napus]	-	-	-	-	-	-	-
novel_circ_000495	miR5656-y	Bra038762	At4g21705	PREDICTED: pentatricopeptide repeat-containing protein At4g21705, mitochondrial [Brassica rapa]	-	-	-	-	GO:0043229//intracellular organelle;GO:0043227//membrane-bounded organelle;GO:0044424//intracellular part;GO:0005622//intracellular;GO:0044464//cell part;GO:0005623//cell;GO:0043226//organelle;GO:0043231//intracellular membrane-bounded organelle	-	-
novel_circ_000495	miR5656-y	Bra040510	SNL1	PREDICTED: paired amphipathic helix protein Sin3-like 1 isoform X1 [Brassica rapa]	-	-	-	-	-	-	-
novel_circ_000495	miR5656-y	Bra040848	-	BnaC02g02810D [Brassica napus]	-	-	-	-	-	-	-
novel_circ_000495	miR3699-y	Bra000130	At2g39360	PREDICTED: probable receptor-like protein kinase At2g39360 [Brassica rapa]	-	-	-	-	GO:0016020//membrane	GO:0016772//transferase activity, transferring phosphorus-containing groups;GO:0016740//transferase activity;GO:0003824//catalytic activity	GO:0044765//single-organism transport;GO:0051234//establishment of localization;GO:0050896//response to stimulus;GO:0001558//regulation of cell growth;GO:0042221//response to chemical;GO:0015698//inorganic anion transport;GO:0051128//regulation of cellular component organization;GO:0065007//biological regulation;GO:0050789//regulation of biological process;GO:0006810//transport;GO:0006811//ion tr…
novel_circ_000495	miR3699-y	Bra000779	UPL5	PREDICTED: E3 ubiquitin-protein ligase UPL5-like [Brassica rapa]	Cellular Processes;Genetic Information Processing	Transport and catabolism;Folding, sorting and degradation	ko04144//Endocytosis;ko04120//Ubiquitin mediated proteolysis	K10591	GO:0043226//organelle;GO:0043231//intracellular membrane-bounded organelle;GO:0043229//intracellular organelle;GO:0005622//intracellular;GO:0044424//intracellular part;GO:0005623//cell;GO:0044464//cell part;GO:0043227//membrane-bounded organelle	GO:0005488//binding;GO:0016740//transferase activity;GO:0003824//catalytic activity;GO:0019787//ubiquitin-like protein transferase activity	GO:0065007//biological regulation;GO:1901700//response to oxygen-containing compound;GO:0001101//response to acid chemical;GO:0032446//protein modification by small protein conjugation;GO:0050896//response to stimulus;GO:0048513//animal organ development;GO:0043412//macromolecule modification;GO:0044699//single-organism process;GO:0032502//developmental process;GO:0009987//cellular process;GO:005…
novel_circ_000495	miR3699-y	Bra003305	SPL15	PREDICTED: squamosa promoter-binding-like protein 15 [Brassica rapa]	-	-	-	-	GO:0005623//cell;GO:0043229//intracellular organelle;GO:0043226//organelle;GO:0044424//intracellular part;GO:0044464//cell part;GO:0043231//intracellular membrane-bounded organelle;GO:0005622//intracellular;GO:0043227//membrane-bounded organelle	GO:0001071//nucleic acid binding transcription factor activity	GO:0071840//cellular component organization or biogenesis;GO:0044271//cellular nitrogen compound biosynthetic process;GO:0048869//cellular developmental process;GO:0034641//cellular nitrogen compound metabolic process;GO:0032989//cellular component morphogenesis;GO:0006725//cellular aromatic compound metabolic process;GO:0044249//cellular biosynthetic process;GO:0010467//gene expression;GO:000300…
novel_circ_000495	miR3699-y	Bra003397	MTHFR1	PREDICTED: methylenetetrahydrofolate reductase 1 [Brassica rapa]	Metabolism	Metabolism of cofactors and vitamins;Global and Overview	ko01100//Metabolic pathways;ko01120//Microbial metabolism in diverse environments;ko01200//Carbon metabolism;ko00670//One carbon pool by folate	K00297	GO:0044444//cytoplasmic part;GO:0005622//intracellular;GO:0005623//cell;GO:0005737//cytoplasm;GO:0044464//cell part;GO:0044424//intracellular part	-	GO:0044710//single-organism metabolic process;GO:0006807//nitrogen compound metabolic process;GO:0044281//small molecule metabolic process;GO:0006082//organic acid metabolic process;GO:1901564//organonitrogen compound metabolic process;GO:0009987//cellular process;GO:0019752//carboxylic acid metabolic process;GO:0043436//oxoacid metabolic process;GO:0044238//primary metabolic process;GO:0071704//…
novel_circ_000495	miR3699-y	Bra004674	SPL9	PREDICTED: squamosa promoter-binding-like protein 9 [Brassica rapa]	-	-	-	-	-	-	-
novel_circ_000495	miR3699-y	Bra004899	-	BnaA05g04750D [Brassica napus]	-	-	-	-	-	-	-
novel_circ_000495	miR3699-y	Bra004954	-	BnaA05g05290D [Brassica napus]	-	-	-	-	GO:0044464//cell part;GO:0009532//plastid stroma;GO:0043226//organelle;GO:0044444//cytoplasmic part;GO:0044446//intracellular organelle part;GO:0043229//intracellular organelle;GO:0044424//intracellular part;GO:0005737//cytoplasm;GO:0005622//intracellular;GO:0005623//cell;GO:0043231//intracellular membrane-bounded organelle;GO:0009536//plastid;GO:0044435//plastid part;GO:0044422//organelle part;G…	-	GO:0006066//alcohol metabolic process;GO:0044699//single-organism process;GO:0006796//phosphate-containing compound metabolic process;GO:0044711//single-organism biosynthetic process;GO:1901615//organic hydroxy compound metabolic process;GO:1901576//organic substance biosynthetic process;GO:0044237//cellular metabolic process;GO:0044281//small molecule metabolic process;GO:0046165//alcohol biosyn…
novel_circ_000495	miR3699-y	Bra005141	CAC3	PREDICTED: acetyl-coenzyme A carboxylase carboxyl transferase subunit alpha, chloroplastic-like [Brassica rapa]	Metabolism	Global and Overview;Lipid metabolism;Carbohydrate metabolism	ko01100//Metabolic pathways;ko01110//Biosynthesis of secondary metabolites;ko01130//Biosynthesis of antibiotics;ko01120//Microbial metabolism in diverse environments;ko01200//Carbon metabolism;ko00620//Pyruvate metabolism;ko01212//Fatty acid metabolism;ko00061//Fatty acid biosynthesis;ko00640//Propanoate metabolism	K01962	GO:0044444//cytoplasmic part;GO:0044435//plastid part;GO:0044422//organelle part;GO:0005737//cytoplasm;GO:0009526//plastid envelope;GO:0031975//envelope;GO:0044424//intracellular part;GO:0043229//intracellular organelle;GO:0043226//organelle;GO:0031967//organelle envelope;GO:0043231//intracellular membrane-bounded organelle;GO:0005623//cell;GO:0009536//plastid;GO:0005622//intracellular;GO:0044464…	GO:0016874//ligase activity;GO:0016421//CoA carboxylase activity;GO:0003824//catalytic activity;GO:0016885//ligase activity, forming carbon-carbon bonds	GO:0044281//small molecule metabolic process;GO:0044699//single-organism process;GO:0006732//coenzyme metabolic process;GO:0044763//single-organism cellular process;GO:0008152//metabolic process;GO:0019752//carboxylic acid metabolic process;GO:0044237//cellular metabolic process;GO:0042180//cellular ketone metabolic process;GO:0006629//lipid metabolic process;GO:0044710//single-organism metabolic…
novel_circ_000495	miR3699-y	Bra005531	ATPC	PREDICTED: ATP synthase subunit gamma, mitochondrial [Brassica rapa]	Metabolism	Energy metabolism;Global and Overview	ko01100//Metabolic pathways;ko00190//Oxidative phosphorylation	K02136	GO:0031975//envelope;GO:0009536//plastid;GO:0043226//organelle;GO:0005740//mitochondrial envelope;GO:0044422//organelle part;GO:0044424//intracellular part;GO:0043233//organelle lumen;GO:0070013//intracellular organelle lumen;GO:0044446//intracellular organelle part;GO:0044428//nuclear part;GO:0044444//cytoplasmic part;GO:0044464//cell part;GO:0019866//organelle inner membrane;GO:0043231//intrace…	GO:0046914//transition metal ion binding;GO:0046872//metal ion binding;GO:0043169//cation binding;GO:0043167//ion binding;GO:0005488//binding	GO:0009167//purine ribonucleoside monophosphate metabolic process;GO:0019941//modification-dependent protein catabolic process;GO:0042455//ribonucleoside biosynthetic process;GO:0046483//heterocycle metabolic process;GO:0032787//monocarboxylic acid metabolic process;GO:1901566//organonitrogen compound biosynthetic process;GO:0071704//organic substance metabolic process;GO:0006725//cellular aromat…
novel_circ_000495	miR3699-y	Bra007145	CHI	PREDICTED: chalcone--flavonone isomerase-like isoform X1 [Brassica rapa]	Metabolism	Global and Overview;Biosynthesis of other secondary metabolites	ko01100//Metabolic pathways;ko01110//Biosynthesis of secondary metabolites;ko00941//Flavonoid biosynthesis	K01859	-	-	-
novel_circ_000495	miR3699-y	Bra007345	rpa1	PREDICTED: DNA-directed RNA polymerase I subunit 1 [Brassica rapa]	Genetic Information Processing;Metabolism	Transcription;Global and Overview;Nucleotide metabolism	ko01100//Metabolic pathways;ko00230//Purine metabolism;ko00240//Pyrimidine metabolism;ko03020//RNA polymerase	K02999	GO:0043227//membrane-bounded organelle;GO:0043231//intracellular membrane-bounded organelle;GO:0005622//intracellular;GO:0005737//cytoplasm;GO:0005623//cell;GO:0044464//cell part;GO:0043226//organelle;GO:0030054//cell junction;GO:0044444//cytoplasmic part;GO:0005911//cell-cell junction;GO:0043229//intracellular organelle;GO:0044424//intracellular part	GO:0016740//transferase activity;GO:0016772//transferase activity, transferring phosphorus-containing groups;GO:0034062//RNA polymerase activity;GO:0016779//nucleotidyltransferase activity;GO:0003824//catalytic activity	GO:0044271//cellular nitrogen compound biosynthetic process;GO:0051234//establishment of localization;GO:0097659//nucleic acid-templated transcription;GO:0050658//RNA transport;GO:0008104//protein localization;GO:0046483//heterocycle metabolic process;GO:0010467//gene expression;GO:1901576//organic substance biosynthetic process;GO:0044260//cellular macromolecule metabolic process;GO:0019438//aro…
novel_circ_000495	miR3699-y	Bra009564	TOP6A	PREDICTED: DNA topoisomerase 6 subunit A [Brassica rapa]	-	-	-	-	GO:0043226//organelle;GO:0044424//intracellular part;GO:0005622//intracellular;GO:0005623//cell;GO:0043231//intracellular membrane-bounded organelle;GO:0043227//membrane-bounded organelle;GO:0043229//intracellular organelle;GO:0044464//cell part	GO:0016817//hydrolase activity, acting on acid anhydrides;GO:0016787//hydrolase activity;GO:0032549//ribonucleoside binding;GO:0008094//DNA-dependent ATPase activity;GO:0017111//nucleoside-triphosphatase activity;GO:0005488//binding;GO:1901363//heterocyclic compound binding;GO:0016462//pyrophosphatase activity;GO:0005515//protein binding;GO:0003824//catalytic activity;GO:0016818//hydrolase activi…	GO:0071103//DNA conformation change;GO:0044767//single-organism developmental process;GO:0030154//cell differentiation;GO:0044699//single-organism process;GO:0016043//cellular component organization;GO:0032502//developmental process;GO:0001708//cell fate specification;GO:0045165//cell fate commitment;GO:0044763//single-organism cellular process;GO:0051276//chromosome organization;GO:0009987//cell…
novel_circ_000495	miR3699-y	Bra009993	NEK3	PREDICTED: serine/threonine-protein kinase Nek3 [Brassica rapa]	-	-	-	-	-	GO:0016740//transferase activity;GO:0003824//catalytic activity;GO:0016772//transferase activity, transferring phosphorus-containing groups	-
novel_circ_000495	miR3699-y	Bra010054	LTP10	BnaA06g21510D [Brassica napus]	-	-	-	-	-	-	-
novel_circ_000495	miR3699-y	Bra010137	-	BnaA06g22430D [Brassica napus]	-	-	-	-	-	-	-
novel_circ_000495	miR3699-y	Bra010356	SAMT	PREDICTED: jasmonate O-methyltransferase-like [Brassica rapa]	-	-	-	-	-	GO:0003824//catalytic activity;GO:0016741//transferase activity, transferring one-carbon groups;GO:0016740//transferase activity;GO:0008168//methyltransferase activity	-
novel_circ_000495	miR3699-y	Bra010949	SPL10	PREDICTED: squamosa promoter-binding-like protein 10 isoform X2 [Brassica rapa]	-	-	-	-	-	-	-
novel_circ_000495	miR3699-y	Bra011136	-	BnaA01g07190D [Brassica napus]	-	-	-	-	GO:0044464//cell part;GO:0043226//organelle;GO:0043227//membrane-bounded organelle;GO:0043231//intracellular membrane-bounded organelle;GO:0043229//intracellular organelle;GO:0005622//intracellular;GO:0005623//cell;GO:0044424//intracellular part	-	-
novel_circ_000495	miR3699-y	Bra011685	SAMT	PREDICTED: salicylate carboxymethyltransferase [Brassica rapa]	-	-	-	-	-	GO:0016741//transferase activity, transferring one-carbon groups;GO:0008168//methyltransferase activity;GO:0016740//transferase activity;GO:0003824//catalytic activity	-
novel_circ_000495	miR3699-y	Bra011860	DDB_G0268328	BnaA01g05510D [Brassica napus]	-	-	-	-	-	-	-
novel_circ_000495	miR3699-y	Bra012223	VHA-B3	PREDICTED: V-type proton ATPase subunit B3 [Raphanus sativus]	Metabolism;Cellular Processes	Transport and catabolism;Energy metabolism;Global and Overview	ko01100//Metabolic pathways;ko00190//Oxidative phosphorylation;ko04145//Phagosome	K02147	-	-	-
novel_circ_000495	miR3699-y	Bra012295	-	BnaA07g10850D [Brassica napus]	-	-	-	-	-	-	-
novel_circ_000495	miR3699-y	Bra012815	Ncor1	BnaA03g41680D [Brassica napus]	-	-	-	-	-	-	-
novel_circ_000495	miR3699-y	Bra013113	-	BnaA03g38770D [Brassica napus]	-	-	-	-	-	-	GO:0071704//organic substance metabolic process;GO:0043647//inositol phosphate metabolic process;GO:0090407//organophosphate biosynthetic process;GO:0008152//metabolic process;GO:0044710//single-organism metabolic process;GO:0046173//polyol biosynthetic process;GO:1901617//organic hydroxy compound biosynthetic process;GO:0044281//small molecule metabolic process;GO:0009987//cellular process;GO:00…
novel_circ_000495	miR3699-y	Bra013692	PME18	PREDICTED: pectinesterase/pectinesterase inhibitor 18-like [Brassica rapa]	Metabolism	Carbohydrate metabolism;Global and Overview	ko01100//Metabolic pathways;ko00500//Starch and sucrose metabolism;ko00040//Pentose and glucuronate interconversions	K01051	GO:0005623//cell;GO:0044464//cell part;GO:0005737//cytoplasm;GO:0044444//cytoplasmic part;GO:0044424//intracellular part;GO:0071944//cell periphery;GO:0043231//intracellular membrane-bounded organelle;GO:0044437//vacuolar part;GO:0043226//organelle;GO:0044446//intracellular organelle part;GO:0043229//intracellular organelle;GO:0043227//membrane-bounded organelle;GO:0044422//organelle part;GO:0005…	GO:0016788//hydrolase activity, acting on ester bonds;GO:0003824//catalytic activity;GO:0016787//hydrolase activity;GO:0052689//carboxylic ester hydrolase activity	GO:0071554//cell wall organization or biogenesis;GO:0009987//cellular process;GO:0071669//plant-type cell wall organization or biogenesis;GO:0071555//cell wall organization;GO:0045229//external encapsulating structure organization;GO:0071840//cellular component organization or biogenesis;GO:0016043//cellular component organization;GO:0009664//plant-type cell wall organization
novel_circ_000495	miR3699-y	Bra013754	NLP7	PREDICTED: protein NLP7 [Brassica rapa]	-	-	-	-	GO:0044424//intracellular part;GO:0043227//membrane-bounded organelle;GO:0044464//cell part;GO:0043226//organelle;GO:0005623//cell;GO:0043231//intracellular membrane-bounded organelle;GO:0005622//intracellular;GO:0043229//intracellular organelle	GO:0001071//nucleic acid binding transcription factor activity	GO:0001101//response to acid chemical;GO:0071704//organic substance metabolic process;GO:0006082//organic acid metabolic process;GO:0006950//response to stress;GO:0042221//response to chemical;GO:0044763//single-organism cellular process;GO:0008152//metabolic process;GO:0043436//oxoacid metabolic process;GO:0044710//single-organism metabolic process;GO:0009987//cellular process;GO:0042126//nitrat…
novel_circ_000495	miR3699-y	Bra014599	SPL15	PREDICTED: squamosa promoter-binding-like protein 15 isoform X1 [Brassica rapa]	-	-	-	-	-	-	GO:0032502//developmental process;GO:0044271//cellular nitrogen compound biosynthetic process;GO:0000003//reproduction;GO:0006351//transcription, DNA-templated;GO:0016070//RNA metabolic process;GO:0044260//cellular macromolecule metabolic process;GO:1901362//organic cyclic compound biosynthetic process;GO:0032774//RNA biosynthetic process;GO:0090066//regulation of anatomical structure size;GO:007…
novel_circ_000495	miR3699-y	Bra015305	-	HR-like lesion-inducing protein-like protein [Arabidopsis thaliana]	-	-	-	-	GO:0005737//cytoplasm;GO:0044464//cell part;GO:0043229//intracellular organelle;GO:0044424//intracellular part;GO:0009536//plastid;GO:0043227//membrane-bounded organelle;GO:0005623//cell;GO:0005622//intracellular;GO:0044444//cytoplasmic part;GO:0043231//intracellular membrane-bounded organelle;GO:0043226//organelle	-	-
novel_circ_000495	miR3699-y	Bra015587	At2g14510	PREDICTED: leucine-rich repeat receptor-like serine/threonine-protein kinase At2g14510 isoform X2 [Brassica napus]	-	-	-	-	-	-	-
novel_circ_000495	miR3699-y	Bra016207	CRK2	PREDICTED: cysteine-rich receptor-like protein kinase 2 [Brassica rapa]	-	-	-	-	GO:0030054//cell junction;GO:0016020//membrane;GO:0005911//cell-cell junction	GO:0016301//kinase activity;GO:0004672//protein kinase activity;GO:0016772//transferase activity, transferring phosphorus-containing groups;GO:0003824//catalytic activity;GO:0016773//phosphotransferase activity, alcohol group as acceptor;GO:0016740//transferase activity	GO:0051716//cellular response to stimulus;GO:0009314//response to radiation;GO:0006950//response to stress;GO:0019538//protein metabolic process;GO:0044765//single-organism transport;GO:0043412//macromolecule modification;GO:0044238//primary metabolic process;GO:0009642//response to light intensity;GO:0044699//single-organism process;GO:0006796//phosphate-containing compound metabolic process;GO:…
novel_circ_000495	miR3699-y	Bra016234	LECRK59	BnaA07g28640D [Brassica napus]	-	-	-	-	-	GO:0016740//transferase activity;GO:0016772//transferase activity, transferring phosphorus-containing groups;GO:0003824//catalytic activity	-
novel_circ_000495	miR3699-y	Bra016891	SPL9	PREDICTED: squamosa promoter-binding-like protein 9 [Brassica rapa]	-	-	-	-	-	GO:0001071//nucleic acid binding transcription factor activity	GO:0018130//heterocycle biosynthetic process;GO:0009058//biosynthetic process;GO:0051239//regulation of multicellular organismal process;GO:0099402//plant organ development;GO:0032501//multicellular organismal process;GO:0003156//regulation of organ formation;GO:0044707//single-multicellular organism process;GO:0022414//reproductive process;GO:0044767//single-organism developmental process;GO:000…
novel_circ_000495	miR3699-y	Bra016915	stmA	BnaA04g24100D [Brassica napus]	-	-	-	-	-	-	-
novel_circ_000495	miR3699-y	Bra017431	TMN3	BnaC09g52300D [Brassica napus]	-	-	-	-	GO:0044446//intracellular organelle part;GO:0005911//cell-cell junction;GO:0044464//cell part;GO:0005622//intracellular;GO:0043227//membrane-bounded organelle;GO:0031224//intrinsic component of membrane;GO:0005773//vacuole;GO:0016020//membrane;GO:0005618//cell wall;GO:0030054//cell junction;GO:0044422//organelle part;GO:0044424//intracellular part;GO:0044444//cytoplasmic part;GO:0044425//membrane…	-	-
novel_circ_000495	miR3699-y	Bra017763	SAMT	PREDICTED: salicylate carboxymethyltransferase-like [Brassica rapa]	-	-	-	-	-	-	-
novel_circ_000495	miR3699-y	Bra017773	-	retrotransposon like protein [Arabidopsis thaliana]	-	-	-	-	-	-	-
novel_circ_000495	miR3699-y	Bra018217	At3g46220	PREDICTED: E3 UFM1-protein ligase 1 homolog [Brassica rapa]	-	-	-	-	-	-	GO:0010410//hemicellulose metabolic process;GO:0044238//primary metabolic process;GO:0071704//organic substance metabolic process;GO:0044237//cellular metabolic process;GO:0043170//macromolecule metabolic process;GO:0044260//cellular macromolecule metabolic process;GO:0044036//cell wall macromolecule metabolic process;GO:0005975//carbohydrate metabolic process;GO:0045491//xylan metabolic process;…
novel_circ_000495	miR3699-y	Bra018962	IST1	BnaA06g01610D [Brassica napus]	Cellular Processes	Transport and catabolism	ko04144//Endocytosis	K19476	-	-	-
novel_circ_000495	miR3699-y	Bra019251	NLP7	PREDICTED: protein NLP7-like [Brassica rapa]	-	-	-	-	GO:0044464//cell part;GO:0005622//intracellular;GO:0043226//organelle;GO:0044424//intracellular part;GO:0005623//cell;GO:0043227//membrane-bounded organelle;GO:0043229//intracellular organelle;GO:0043231//intracellular membrane-bounded organelle	GO:0001071//nucleic acid binding transcription factor activity	GO:0071704//organic substance metabolic process;GO:0050896//response to stimulus;GO:0008152//metabolic process;GO:0006807//nitrogen compound metabolic process;GO:0043436//oxoacid metabolic process;GO:0006950//response to stress;GO:0001101//response to acid chemical;GO:0006082//organic acid metabolic process;GO:0042126//nitrate metabolic process;GO:0044699//single-organism process;GO:0042221//resp…
novel_circ_000495	miR3699-y	Bra019618	IRX10L	PREDICTED: probable beta-1,4-xylosyltransferase IRX10L [Brassica rapa]	-	-	-	-	GO:0044424//intracellular part;GO:0044464//cell part;GO:0043226//organelle;GO:0043231//intracellular membrane-bounded organelle;GO:0043229//intracellular organelle;GO:0005622//intracellular;GO:0005623//cell;GO:0043227//membrane-bounded organelle	GO:0016758//transferase activity, transferring hexosyl groups;GO:0016757//transferase activity, transferring glycosyl groups;GO:0015020//glucuronosyltransferase activity;GO:0008194//UDP-glycosyltransferase activity;GO:0016740//transferase activity;GO:0003824//catalytic activity	GO:0071840//cellular component organization or biogenesis;GO:0044238//primary metabolic process;GO:0044237//cellular metabolic process;GO:0044260//cellular macromolecule metabolic process;GO:0005976//polysaccharide metabolic process;GO:0010383//cell wall polysaccharide metabolic process;GO:0010413//glucuronoxylan metabolic process;GO:0009987//cellular process;GO:0009832//plant-type cell wall biog…
novel_circ_000495	miR3699-y	Bra019896	AGD4	PREDICTED: ADP-ribosylation factor GTPase-activating protein AGD4 isoform X1 [Brassica rapa]	Cellular Processes	Transport and catabolism	ko04144//Endocytosis	K12489	-	GO:0030234//enzyme regulator activity;GO:0005488//binding;GO:0098772//molecular function regulator;GO:0030695//GTPase regulator activity;GO:0046872//metal ion binding;GO:0043167//ion binding;GO:0060589//nucleoside-triphosphatase regulator activity;GO:0043169//cation binding;GO:0046914//transition metal ion binding	GO:0051336//regulation of hydrolase activity;GO:0009966//regulation of signal transduction;GO:0032012//regulation of ARF protein signal transduction;GO:0046578//regulation of Ras protein signal transduction;GO:0051056//regulation of small GTPase mediated signal transduction;GO:0043087//regulation of GTPase activity;GO:0010646//regulation of cell communication;GO:0065007//biological regulation;GO:…
novel_circ_000495	miR3699-y	Bra020606	NEK3	PREDICTED: serine/threonine-protein kinase Nek3-like [Brassica rapa]	-	-	-	-	-	-	-
novel_circ_000495	miR3699-y	Bra021797	CSLB3	PREDICTED: LOW QUALITY PROTEIN: cellulose synthase-like protein B3 [Brassica rapa]	-	-	-	-	GO:0005623//cell;GO:0005622//intracellular;GO:0043227//membrane-bounded organelle;GO:0044464//cell part;GO:0043229//intracellular organelle;GO:0043231//intracellular membrane-bounded organelle;GO:0044424//intracellular part;GO:0043226//organelle	GO:0016758//transferase activity, transferring hexosyl groups;GO:0003824//catalytic activity;GO:0016757//transferase activity, transferring glycosyl groups;GO:0016740//transferase activity;GO:0046527//glucosyltransferase activity	-
novel_circ_000495	miR3699-y	Bra021826	ATPC	PREDICTED: ATP synthase subunit gamma, mitochondrial-like [Brassica rapa]	Metabolism	Global and Overview;Energy metabolism	ko01100//Metabolic pathways;ko00190//Oxidative phosphorylation	K02136	GO:0043226//organelle;GO:0031974//membrane-enclosed lumen;GO:0031967//organelle envelope;GO:0005739//mitochondrion;GO:0005634//nucleus;GO:0070013//intracellular organelle lumen;GO:0044428//nuclear part;GO:0043231//intracellular membrane-bounded organelle;GO:0031975//envelope;GO:0019866//organelle inner membrane;GO:0043229//intracellular organelle;GO:0005743//mitochondrial inner membrane;GO:004322…	GO:0043169//cation binding;GO:0005488//binding;GO:0043167//ion binding;GO:0046872//metal ion binding;GO:0046914//transition metal ion binding	GO:0072522//purine-containing compound biosynthetic process;GO:1901657//glycosyl compound metabolic process;GO:0019752//carboxylic acid metabolic process;GO:0009152//purine ribonucleotide biosynthetic process;GO:0009123//nucleoside monophosphate metabolic process;GO:0019941//modification-dependent protein catabolic process;GO:1901360//organic cyclic compound metabolic process;GO:0009168//purine r…
novel_circ_000495	miR3699-y	Bra022766	SPL13B	PREDICTED: squamosa promoter-binding-like protein 13A [Brassica rapa]	-	-	-	-	-	-	-
novel_circ_000495	miR3699-y	Bra022826	At2g31100	PREDICTED: phospholipase A1-IIbeta-like [Brassica rapa]	-	-	-	-	-	-	-
novel_circ_000495	miR3699-y	Bra022838	BBX25	BnaA03g14410D [Brassica napus]	-	-	-	-	-	GO:0005488//binding;GO:0005515//protein binding	GO:0043170//macromolecule metabolic process;GO:0009416//response to light stimulus;GO:0044283//small molecule biosynthetic process;GO:1901615//organic hydroxy compound metabolic process;GO:0009314//response to radiation;GO:0010467//gene expression;GO:0006725//cellular aromatic compound metabolic process;GO:0044699//single-organism process;GO:0042221//response to chemical;GO:0018130//heterocycle b…
novel_circ_000495	miR3699-y	Bra022908	ATPC	PREDICTED: ATP synthase subunit gamma, mitochondrial [Brassica rapa]	Metabolism	Global and Overview;Energy metabolism	ko01100//Metabolic pathways;ko00190//Oxidative phosphorylation	K02136	GO:0031975//envelope;GO:0070013//intracellular organelle lumen;GO:0043229//intracellular organelle;GO:0005740//mitochondrial envelope;GO:0031981//nuclear lumen;GO:0043233//organelle lumen;GO:0044429//mitochondrial part;GO:0044464//cell part;GO:0031966//mitochondrial membrane;GO:0005623//cell;GO:0044422//organelle part;GO:0043226//organelle;GO:0005737//cytoplasm;GO:0044446//intracellular organelle…	GO:0005488//binding;GO:0043167//ion binding;GO:0046872//metal ion binding;GO:0046914//transition metal ion binding;GO:0043169//cation binding	GO:0008152//metabolic process;GO:0044765//single-organism transport;GO:0051234//establishment of localization;GO:0006796//phosphate-containing compound metabolic process;GO:0043094//cellular metabolic compound salvage;GO:1901135//carbohydrate derivative metabolic process;GO:0006163//purine nucleotide metabolic process;GO:0019752//carboxylic acid metabolic process;GO:1901657//glycosyl compound met…
novel_circ_000495	miR3699-y	Bra023169	AKHSDH1	PREDICTED: bifunctional aspartokinase/homoserine dehydrogenase 1, chloroplastic [Brassica rapa]	Metabolism	Global and Overview;Amino acid metabolism;Biosynthesis of other secondary metabolites	ko01100//Metabolic pathways;ko01110//Biosynthesis of secondary metabolites;ko01130//Biosynthesis of antibiotics;ko01120//Microbial metabolism in diverse environments;ko01230//Biosynthesis of amino acids;ko00270//Cysteine and methionine metabolism;ko00260//Glycine, serine and threonine metabolism;ko00300//Lysine biosynthesis;ko00261//Monobactam biosynthesis	K12524	GO:0044424//intracellular part;GO:0044446//intracellular organelle part;GO:0044444//cytoplasmic part;GO:0005622//intracellular;GO:0044464//cell part;GO:0043227//membrane-bounded organelle;GO:0009536//plastid;GO:0005737//cytoplasm;GO:0009532//plastid stroma;GO:0044422//organelle part;GO:0043231//intracellular membrane-bounded organelle;GO:0043229//intracellular organelle;GO:0005623//cell;GO:004322…	GO:0016491//oxidoreductase activity;GO:0016772//transferase activity, transferring phosphorus-containing groups;GO:0016616//oxidoreductase activity, acting on the CH-OH group of donors, NAD or NADP as acceptor;GO:0016740//transferase activity;GO:0016774//phosphotransferase activity, carboxyl group as acceptor;GO:0003824//catalytic activity;GO:0016614//oxidoreductase activity, acting on CH-OH grou…	GO:0044237//cellular metabolic process;GO:0044281//small molecule metabolic process;GO:0006082//organic acid metabolic process;GO:1901659//glycosyl compound biosynthetic process;GO:1901135//carbohydrate derivative metabolic process;GO:1901605//alpha-amino acid metabolic process;GO:0008152//metabolic process;GO:0044042//glucan metabolic process;GO:0044264//cellular polysaccharide metabolic process…
novel_circ_000495	miR3699-y	Bra023714	At3g06035	PREDICTED: uncharacterized GPI-anchored protein At5g19250-like [Brassica rapa]	-	-	-	-	-	-	-
novel_circ_000495	miR3699-y	Bra023715	At5g19250	PREDICTED: uncharacterized GPI-anchored protein At5g19250-like [Brassica rapa]	-	-	-	-	GO:0044425//membrane part;GO:0031225//anchored component of membrane;GO:0016020//membrane;GO:0031224//intrinsic component of membrane	-	GO:0051234//establishment of localization;GO:0044763//single-organism cellular process;GO:0009743//response to carbohydrate;GO:0019725//cellular homeostasis;GO:0006811//ion transport;GO:0065008//regulation of biological quality;GO:0042221//response to chemical;GO:1902578//single-organism localization;GO:0034284//response to monosaccharide;GO:0009628//response to abiotic stimulus;GO:0044699//singl…
novel_circ_000495	miR3699-y	Bra024190	FAO4B	PREDICTED: long-chain-alcohol oxidase FAO4B [Brassica rapa]	-	-	-	-	GO:0043227//membrane-bounded organelle;GO:0043231//intracellular membrane-bounded organelle;GO:0005623//cell;GO:0044464//cell part;GO:0005622//intracellular;GO:0044424//intracellular part;GO:0043226//organelle;GO:0043229//intracellular organelle	-	GO:0046907//intracellular transport;GO:0051234//establishment of localization;GO:0051179//localization;GO:0051649//establishment of localization in cell;GO:0051641//cellular localization;GO:0006810//transport;GO:0016482//cytoplasmic transport
novel_circ_000495	miR3699-y	Bra024579	At5g56420	BnaA09g31230D [Brassica napus]	-	-	-	-	-	-	-
novel_circ_000495	miR3699-y	Bra025015	-	BnaA06g35940D [Brassica napus]	-	-	-	-	-	-	-
novel_circ_000495	miR3699-y	Bra025195	-	PREDICTED: acetolactate synthase 3, chloroplastic-like [Brassica rapa]	Metabolism	Global and Overview;Amino acid metabolism;Carbohydrate metabolism;Metabolism of cofactors and vitamins	ko01100//Metabolic pathways;ko01110//Biosynthesis of secondary metabolites;ko01130//Biosynthesis of antibiotics;ko01230//Biosynthesis of amino acids;ko01210//2-Oxocarboxylic acid metabolism;ko00770//Pantothenate and CoA biosynthesis;ko00650//Butanoate metabolism;ko00290//Valine, leucine and isoleucine biosynthesis;ko00660//C5-Branched dibasic acid metabolism	K01652	-	-	-
novel_circ_000495	miR3699-y	Bra025935	RLP12	PREDICTED: receptor like protein 30-like [Brassica rapa]	-	-	-	-	-	-	-
novel_circ_000495	miR3699-y	Bra025982	SAC5	PREDICTED: phosphoinositide phosphatase SAC5-like [Brassica rapa]	-	-	-	-	-	-	-
novel_circ_000495	miR3699-y	Bra026264	UGD4	PREDICTED: UDP-glucose 6-dehydrogenase 4-like [Brassica rapa]	Metabolism	Carbohydrate metabolism;Global and Overview	ko01100//Metabolic pathways;ko00500//Starch and sucrose metabolism;ko00520//Amino sugar and nucleotide sugar metabolism;ko00040//Pentose and glucuronate interconversions;ko00053//Ascorbate and aldarate metabolism	K00012	-	-	-
novel_circ_000495	miR3699-y	Bra026289	At4g28040	PREDICTED: WAT1-related protein At4g28040 [Brassica rapa]	-	-	-	-	-	-	-
novel_circ_000495	miR3699-y	Bra026916	MAP1B	PREDICTED: methionine aminopeptidase 1B, chloroplastic-like [Brassica rapa]	-	-	-	-	-	-	-
novel_circ_000495	miR3699-y	Bra027124	AGD2	BnaA09g53230D [Brassica napus]	Cellular Processes	Transport and catabolism	ko04144//Endocytosis	K12489	GO:0005623//cell;GO:0044444//cytoplasmic part;GO:0044464//cell part;GO:0043229//intracellular organelle;GO:0043231//intracellular membrane-bounded organelle;GO:0043227//membrane-bounded organelle;GO:0044435//plastid part;GO:0043226//organelle;GO:0044446//intracellular organelle part;GO:0005737//cytoplasm;GO:0044424//intracellular part;GO:0009532//plastid stroma;GO:0005622//intracellular;GO:004442…	GO:0008483//transaminase activity;GO:0043169//cation binding;GO:0005488//binding;GO:0016740//transferase activity;GO:0003824//catalytic activity;GO:0046872//metal ion binding;GO:0016769//transferase activity, transferring nitrogenous groups;GO:0043167//ion binding;GO:0046914//transition metal ion binding	GO:0016246//RNA interference;GO:0018205//peptidyl-lysine modification;GO:0071407//cellular response to organic cyclic compound;GO:0051248//negative regulation of protein metabolic process;GO:0034968//histone lysine methylation;GO:0050794//regulation of cellular process;GO:0009067//aspartate family amino acid biosynthetic process;GO:0044237//cellular metabolic process;GO:0003006//developmental pro…
novel_circ_000495	miR3699-y	Bra027478	SPL2	PREDICTED: squamosa promoter-binding-like protein 2 [Brassica rapa]	-	-	-	-	-	-	-
novel_circ_000495	miR3699-y	Bra027743	N	BnaA09g12100D [Brassica napus]	-	-	-	-	-	-	-
novel_circ_000495	miR3699-y	Bra027938	At3g47570	PREDICTED: LOW QUALITY PROTEIN: probable LRR receptor-like serine/threonine-protein kinase At3g47570 [Brassica rapa]	-	-	-	-	GO:0016020//membrane	GO:1901363//heterocyclic compound binding;GO:0097367//carbohydrate derivative binding;GO:0097159//organic cyclic compound binding;GO:0001883//purine nucleoside binding;GO:0003824//catalytic activity;GO:0016772//transferase activity, transferring phosphorus-containing groups;GO:0005488//binding;GO:0032550//purine ribonucleoside binding;GO:0036094//small molecule binding;GO:0016740//transferase act…	GO:0007167//enzyme linked receptor protein signaling pathway;GO:0050896//response to stimulus;GO:0071704//organic substance metabolic process;GO:0043170//macromolecule metabolic process;GO:0036211//protein modification process;GO:0044267//cellular protein metabolic process;GO:0044237//cellular metabolic process;GO:0044238//primary metabolic process;GO:0051716//cellular response to stimulus;GO:000…
novel_circ_000495	miR3699-y	Bra028013	GXM3	PREDICTED: glucuronoxylan 4-O-methyltransferase 3-like [Brassica rapa]	-	-	-	-	-	-	-
novel_circ_000495	miR3699-y	Bra028430	UGD4	PREDICTED: UDP-glucose 6-dehydrogenase 4-like [Brassica napus]	Metabolism	Carbohydrate metabolism;Global and Overview	ko01100//Metabolic pathways;ko00500//Starch and sucrose metabolism;ko00520//Amino sugar and nucleotide sugar metabolism;ko00040//Pentose and glucuronate interconversions;ko00053//Ascorbate and aldarate metabolism	K00012	-	-	-
novel_circ_000495	miR3699-y	Bra028451	At5g40240	BnaA07g14880D [Brassica napus]	-	-	-	-	-	-	-
novel_circ_000495	miR3699-y	Bra028701	Snd1	PREDICTED: staphylococcal nuclease domain-containing protein 1-like [Brassica rapa]	-	-	-	-	-	-	-
novel_circ_000495	miR3699-y	Bra029448	At4g00893	PREDICTED: F-box protein At4g00893-like [Brassica napus]	-	-	-	-	-	-	-
novel_circ_000495	miR3699-y	Bra029698	CHC2	Clathrin heavy chain 1 [Glycine soja]	Cellular Processes	Transport and catabolism	ko04144//Endocytosis	K04646	-	-	-
novel_circ_000495	miR3699-y	Bra029840	At4g26340	BnaC05g42620D [Brassica napus]	-	-	-	-	-	-	-
novel_circ_000495	miR3699-y	Bra029865	At4g10400	BnaA05g28160D [Brassica napus]	-	-	-	-	-	-	-
novel_circ_000495	miR3699-y	Bra029894	SETH6	PREDICTED: BTB/POZ domain-containing protein SETH6 [Brassica rapa]	-	-	-	-	-	-	-
novel_circ_000495	miR3699-y	Bra030040	SPL11	PREDICTED: squamosa promoter-binding-like protein 11 [Brassica rapa]	-	-	-	-	GO:0005622//intracellular;GO:0044424//intracellular part;GO:0043229//intracellular organelle;GO:0043226//organelle;GO:0005623//cell;GO:0043231//intracellular membrane-bounded organelle;GO:0043227//membrane-bounded organelle;GO:0044464//cell part	GO:0001071//nucleic acid binding transcription factor activity	GO:0008152//metabolic process;GO:2000026//regulation of multicellular organismal development;GO:0032774//RNA biosynthetic process;GO:0048509//regulation of meristem development;GO:0006139//nucleobase-containing compound metabolic process;GO:0034641//cellular nitrogen compound metabolic process;GO:0048506//regulation of timing of meristematic phase transition;GO:0071704//organic substance metaboli…
novel_circ_000495	miR3699-y	Bra030041	SPL10	PREDICTED: squamosa promoter-binding-like protein 10 isoform X1 [Brassica rapa]	-	-	-	-	-	-	-
novel_circ_000495	miR3699-y	Bra030338	At4g15540	PREDICTED: WAT1-related protein At4g15540 [Brassica rapa]	-	-	-	-	-	-	-
novel_circ_000495	miR3699-y	Bra030340	At2g43260	PREDICTED: F-box/LRR-repeat protein At2g43260-like isoform X2 [Brassica rapa]	-	-	-	-	-	-	-
novel_circ_000495	miR3699-y	Bra031135	BUB1	BnaA09g43640D [Brassica napus]	-	-	-	-	-	-	-
novel_circ_000495	miR3699-y	Bra031249	ABCG15	PREDICTED: ABC transporter G family member 15 [Brassica rapa]	-	-	-	-	-	-	-
novel_circ_000495	miR3699-y	Bra032446	RECQL4A	BnaA09g50140D [Brassica napus]	-	-	-	-	-	-	-
novel_circ_000495	miR3699-y	Bra032450	ATX2	PREDICTED: histone-lysine N-methyltransferase ATX2 [Brassica rapa]	-	-	-	-	-	-	-
novel_circ_000495	miR3699-y	Bra032822	SPL11	PREDICTED: squamosa promoter-binding-like protein 11 [Brassica rapa]	-	-	-	-	GO:0043227//membrane-bounded organelle;GO:0005623//cell;GO:0044424//intracellular part;GO:0005622//intracellular;GO:0043231//intracellular membrane-bounded organelle;GO:0043229//intracellular organelle;GO:0043226//organelle;GO:0044464//cell part	GO:0001071//nucleic acid binding transcription factor activity	GO:1901362//organic cyclic compound biosynthetic process;GO:0016070//RNA metabolic process;GO:0034645//cellular macromolecule biosynthetic process;GO:0008152//metabolic process;GO:0048509//regulation of meristem development;GO:0040034//regulation of development, heterochronic;GO:0044249//cellular biosynthetic process;GO:0097659//nucleic acid-templated transcription;GO:0032774//RNA biosynthetic pr…
novel_circ_000495	miR3699-y	Bra033573	RPN10	PREDICTED: 26S proteasome non-ATPase regulatory subunit 4 homolog [Brassica rapa]	Genetic Information Processing	Folding, sorting and degradation	ko03050//Proteasome	K03029	GO:0005838//proteasome regulatory particle;GO:0044444//cytoplasmic part;GO:0032991//macromolecular complex;GO:0043231//intracellular membrane-bounded organelle;GO:0044424//intracellular part;GO:0044464//cell part;GO:0043229//intracellular organelle;GO:0043226//organelle;GO:0005622//intracellular;GO:0005737//cytoplasm;GO:0022624//proteasome accessory complex;GO:0005623//cell;GO:0043227//membrane-b…	GO:0038023//signaling receptor activity;GO:0004872//receptor activity;GO:0004871//signal transducer activity;GO:0060089//molecular transducer activity	GO:0010260//organ senescence;GO:0099402//plant organ development;GO:0019748//secondary metabolic process;GO:0016043//cellular component organization;GO:0009743//response to carbohydrate;GO:0006631//fatty acid metabolic process;GO:0044710//single-organism metabolic process;GO:0043436//oxoacid metabolic process;GO:0001101//response to acid chemical;GO:0043623//cellular protein complex assembly;GO:0…
novel_circ_000495	miR3699-y	Bra033631	GGT1	PREDICTED: gamma-glutamyltranspeptidase 1-like [Brassica rapa]	Metabolism	Lipid metabolism;Global and Overview;Metabolism of other amino acids	ko01100//Metabolic pathways;ko00480//Glutathione metabolism;ko00460//Cyanoamino acid metabolism;ko00590//Arachidonic acid metabolism;ko00430//Taurine and hypotaurine metabolism	K18592	-	-	-
novel_circ_000495	miR3699-y	Bra033671	SPL2	PREDICTED: squamosa promoter-binding-like protein 2 isoform X1 [Brassica rapa]	-	-	-	-	-	-	-
novel_circ_000495	miR3699-y	Bra034143	At5g56370	BnaA09g31230D [Brassica napus]	-	-	-	-	-	-	-
novel_circ_000495	miR3699-y	Bra034460	GXM3	PREDICTED: glucuronoxylan 4-O-methyltransferase 3 [Brassica rapa]	-	-	-	-	-	-	-
novel_circ_000495	miR3699-y	Bra034551	FBL15	PREDICTED: F-box/LRR-repeat protein 15-like [Brassica napus]	-	-	-	-	-	-	-
novel_circ_000495	miR3699-y	Bra034692	VCS	PREDICTED: enhancer of mRNA-decapping protein 4 isoform X1 [Brassica rapa]	Genetic Information Processing	Folding, sorting and degradation	ko03018//RNA degradation	K12616	-	-	-
novel_circ_000495	miR3699-y	Bra035616	At1g32375	PREDICTED: probable FBD-associated F-box protein At1g32375 [Brassica rapa]	-	-	-	-	GO:0043226//organelle;GO:0043227//membrane-bounded organelle;GO:0005623//cell;GO:0043229//intracellular organelle;GO:0044424//intracellular part;GO:0044464//cell part;GO:0043231//intracellular membrane-bounded organelle;GO:0005622//intracellular	-	-
novel_circ_000495	miR3699-y	Bra036310	WDR6	BnaA09g00400D [Brassica napus]	-	-	-	-	-	-	-
novel_circ_000495	miR3699-y	Bra037674	HOL3	PREDICTED: probable thiol methyltransferase 2 [Brassica rapa]	-	-	-	-	GO:0044444//cytoplasmic part;GO:0043229//intracellular organelle;GO:0044424//intracellular part;GO:0044422//organelle part;GO:0005737//cytoplasm;GO:0043226//organelle;GO:0044464//cell part;GO:0009526//plastid envelope;GO:0043231//intracellular membrane-bounded organelle;GO:0009536//plastid;GO:0043227//membrane-bounded organelle;GO:0031975//envelope;GO:0031967//organelle envelope;GO:0005623//cell;…	GO:0008172//S-methyltransferase activity;GO:0016741//transferase activity, transferring one-carbon groups;GO:0003824//catalytic activity;GO:0016740//transferase activity;GO:0008168//methyltransferase activity	-
novel_circ_000495	miR3699-y	Bra038324	SPL6	PREDICTED: squamosa promoter-binding-like protein 6 [Brassica rapa]	-	-	-	-	-	-	-
novel_circ_000495	miR3699-y	Bra038384	TCP11	BnaA09g23020D [Brassica napus]	-	-	-	-	-	-	-
novel_circ_000495	miR3699-y	Bra038537	PAT	PREDICTED: bifunctional aspartate aminotransferase and glutamate/aspartate-prephenate aminotransferase isoform X1 [Brassica rapa]	Metabolism	Global and Overview;Amino acid metabolism;Biosynthesis of other secondary metabolites	ko01100//Metabolic pathways;ko01110//Biosynthesis of secondary metabolites;ko01130//Biosynthesis of antibiotics;ko01230//Biosynthesis of amino acids;ko00360//Phenylalanine metabolism;ko00400//Phenylalanine, tyrosine and tryptophan biosynthesis;ko00350//Tyrosine metabolism;ko00960//Tropane, piperidine and pyridine alkaloid biosynthesis;ko00950//Isoquinoline alkaloid biosynthesis	K15849	GO:0043229//intracellular organelle;GO:0005623//cell;GO:0009532//plastid stroma;GO:0044446//intracellular organelle part;GO:0005622//intracellular;GO:0043226//organelle;GO:0044422//organelle part;GO:0043227//membrane-bounded organelle;GO:0044424//intracellular part;GO:0044435//plastid part;GO:0005737//cytoplasm;GO:0043231//intracellular membrane-bounded organelle;GO:0044444//cytoplasmic part;GO:0…	GO:0016740//transferase activity;GO:0008483//transaminase activity;GO:0016769//transferase activity, transferring nitrogenous groups;GO:0003824//catalytic activity	GO:0044249//cellular biosynthetic process;GO:0016053//organic acid biosynthetic process;GO:0043436//oxoacid metabolic process;GO:0044711//single-organism biosynthetic process;GO:0019752//carboxylic acid metabolic process;GO:0000003//reproduction;GO:0019438//aromatic compound biosynthetic process;GO:0009987//cellular process;GO:0009073//aromatic amino acid family biosynthetic process;GO:0046394//c…
novel_circ_000495	miR3699-y	Bra038830	ADO2	PREDICTED: adagio protein 2-like [Brassica rapa]	-	-	-	-	GO:0044422//organelle part;GO:0044446//intracellular organelle part;GO:0044424//intracellular part;GO:0005654//nucleoplasm;GO:0043226//organelle;GO:0005622//intracellular;GO:0043231//intracellular membrane-bounded organelle;GO:0005634//nucleus;GO:0043233//organelle lumen;GO:0005623//cell;GO:0044444//cytoplasmic part;GO:0016604//nuclear body;GO:0070013//intracellular organelle lumen;GO:0043227//me…	GO:0005488//binding	GO:0009628//response to abiotic stimulus;GO:0043170//macromolecule metabolic process;GO:0019941//modification-dependent protein catabolic process;GO:0044267//cellular protein metabolic process;GO:0043632//modification-dependent macromolecule catabolic process;GO:0008152//metabolic process;GO:0044237//cellular metabolic process;GO:0044260//cellular macromolecule metabolic process;GO:0006508//prote…
novel_circ_000495	miR3699-y	Bra038989	-	BnaAnng10430D [Brassica napus]	-	-	-	-	-	-	-
novel_circ_000495	miR3699-y	Bra039073	dtl	PREDICTED: denticleless protein homolog isoform X2 [Brassica rapa]	-	-	-	-	GO:0044464//cell part;GO:0032991//macromolecular complex;GO:0043231//intracellular membrane-bounded organelle;GO:1990234//transferase complex;GO:1902494//catalytic complex;GO:0031461//cullin-RING ubiquitin ligase complex;GO:0043229//intracellular organelle;GO:0000151//ubiquitin ligase complex;GO:0005622//intracellular;GO:0043227//membrane-bounded organelle;GO:0043234//protein complex;GO:0005623//…	-	GO:0006139//nucleobase-containing compound metabolic process;GO:0090304//nucleic acid metabolic process;GO:0044238//primary metabolic process;GO:0006807//nitrogen compound metabolic process;GO:0009058//biosynthetic process;GO:0034641//cellular nitrogen compound metabolic process;GO:0046483//heterocycle metabolic process;GO:1901360//organic cyclic compound metabolic process;GO:0044249//cellular bi…
novel_circ_000495	miR3699-y	Bra039317	At4g11680	PREDICTED: E3 ubiquitin-protein ligase At1g63170-like [Brassica rapa]	-	-	-	-	-	-	-
novel_circ_000495	miR3699-y	Bra039318	At4g11680	PREDICTED: E3 ubiquitin-protein ligase At1g63170-like [Brassica rapa]	-	-	-	-	-	-	-
novel_circ_000495	miR3699-y	Bra039367	SRF4	protein kinase-like protein [Arabidopsis thaliana]	-	-	-	-	-	-	-
novel_circ_000495	miR3699-y	Bra040364	CALS9	PREDICTED: callose synthase 9-like isoform X1 [Brassica rapa]	-	-	-	-	-	-	-
novel_circ_000495	miR3699-y	Bra040765	-	BnaA01g35590D [Brassica napus]	-	-	-	-	-	-	-
novel_circ_001061	miR5043-x	Bra000150	P5CSA	PREDICTED: delta-1-pyrroline-5-carboxylate synthase A-like [Brassica rapa]	Metabolism	Global and Overview;Amino acid metabolism	ko01100//Metabolic pathways;ko01110//Biosynthesis of secondary metabolites;ko01230//Biosynthesis of amino acids;ko00330//Arginine and proline metabolism	K12657	GO:0005623//cell;GO:0043231//intracellular membrane-bounded organelle;GO:0044424//intracellular part;GO:0043227//membrane-bounded organelle;GO:0044444//cytoplasmic part;GO:0005737//cytoplasm;GO:0005622//intracellular;GO:0009536//plastid;GO:0044464//cell part;GO:0043229//intracellular organelle;GO:0043226//organelle	GO:0016491//oxidoreductase activity;GO:0016620//oxidoreductase activity, acting on the aldehyde or oxo group of donors, NAD or NADP as acceptor;GO:0003824//catalytic activity;GO:0016903//oxidoreductase activity, acting on the aldehyde or oxo group of donors	GO:0010035//response to inorganic substance;GO:0046483//heterocycle metabolic process;GO:0044238//primary metabolic process;GO:0048229//gametophyte development;GO:0008152//metabolic process;GO:0043436//oxoacid metabolic process;GO:0048856//anatomical structure development;GO:0009414//response to water deprivation;GO:0006950//response to stress;GO:0044699//single-organism process;GO:0044763//singl…
novel_circ_001061	miR5043-x	Bra000372	ZAT4	PREDICTED: zinc finger protein ZAT4 isoform X1 [Brassica rapa]	-	-	-	-	GO:0043227//membrane-bounded organelle;GO:0043226//organelle;GO:0044464//cell part;GO:0005623//cell;GO:0044424//intracellular part;GO:0043231//intracellular membrane-bounded organelle;GO:0043229//intracellular organelle;GO:0005622//intracellular	GO:0046914//transition metal ion binding;GO:0001071//nucleic acid binding transcription factor activity;GO:0005488//binding;GO:0046872//metal ion binding;GO:0043169//cation binding;GO:0043167//ion binding	GO:0010467//gene expression;GO:0046483//heterocycle metabolic process;GO:0097659//nucleic acid-templated transcription;GO:0044249//cellular biosynthetic process;GO:0006725//cellular aromatic compound metabolic process;GO:0008152//metabolic process;GO:0006351//transcription, DNA-templated;GO:1901576//organic substance biosynthetic process;GO:0043170//macromolecule metabolic process;GO:0034641//cel…
novel_circ_001061	miR5043-x	Bra000717	IQD14	PREDICTED: protein IQ-DOMAIN 14 isoform X2 [Brassica rapa]	-	-	-	-	-	-	-
novel_circ_001061	miR5043-x	Bra000853	TUFA	PREDICTED: elongation factor Tu, mitochondrial [Brassica rapa]	-	-	-	-	GO:0043231//intracellular membrane-bounded organelle;GO:0043226//organelle;GO:0071944//cell periphery;GO:0044444//cytoplasmic part;GO:0043227//membrane-bounded organelle;GO:0005622//intracellular;GO:0005737//cytoplasm;GO:0044464//cell part;GO:0005623//cell;GO:0043229//intracellular organelle;GO:0030312//external encapsulating structure;GO:0044424//intracellular part	GO:0032549//ribonucleoside binding;GO:0097159//organic cyclic compound binding;GO:0046914//transition metal ion binding;GO:1901363//heterocyclic compound binding;GO:0043169//cation binding;GO:0001882//nucleoside binding;GO:0046872//metal ion binding;GO:0032550//purine ribonucleoside binding;GO:0097367//carbohydrate derivative binding;GO:0036094//small molecule binding;GO:0001883//purine nucleosid…	GO:0044711//single-organism biosynthetic process;GO:0009987//cellular process;GO:0072528//pyrimidine-containing compound biosynthetic process;GO:1901564//organonitrogen compound metabolic process;GO:1901362//organic cyclic compound biosynthetic process;GO:0006796//phosphate-containing compound metabolic process;GO:0008152//metabolic process;GO:1901360//organic cyclic compound metabolic process;GO…
novel_circ_001061	miR5043-x	Bra001390	ATL66	PREDICTED: RING-H2 finger protein ATL66-like [Brassica rapa]	-	-	-	-	-	GO:0005488//binding;GO:0043169//cation binding;GO:0046914//transition metal ion binding;GO:0043167//ion binding;GO:0046872//metal ion binding	GO:0009719//response to endogenous stimulus;GO:0042221//response to chemical;GO:0010033//response to organic substance;GO:0009725//response to hormone;GO:0050896//response to stimulus
novel_circ_001061	miR5043-x	Bra002028	DSK2B	PREDICTED: ubiquitin domain-containing protein DSK2b [Brassica rapa]	Genetic Information Processing	Folding, sorting and degradation	ko04141//Protein processing in endoplasmic reticulum	K04523	-	-	-
novel_circ_001061	miR5043-x	Bra002660	MDH1	PREDICTED: malate dehydrogenase [NADP], chloroplastic [Brassica rapa]	Metabolism	Energy metabolism;Carbohydrate metabolism;Global and Overview	ko01100//Metabolic pathways;ko01120//Microbial metabolism in diverse environments;ko01200//Carbon metabolism;ko00620//Pyruvate metabolism;ko00710//Carbon fixation in photosynthetic organisms	K00051	-	-	-
novel_circ_001061	miR5043-x	Bra003319	-	BnaA07g37920D [Brassica napus]	-	-	-	-	GO:0005622//intracellular;GO:0043226//organelle;GO:0044464//cell part;GO:0044424//intracellular part;GO:0005623//cell;GO:0043229//intracellular organelle;GO:0043227//membrane-bounded organelle;GO:0043231//intracellular membrane-bounded organelle	-	-
novel_circ_001061	miR5043-x	Bra003408	ppt3	PREDICTED: palmitoyl-protein thioesterase 1 isoform X1 [Brassica rapa]	Metabolism	Global and Overview;Lipid metabolism	ko01100//Metabolic pathways;ko01212//Fatty acid metabolism;ko00062//Fatty acid elongation	K01074	GO:0043227//membrane-bounded organelle;GO:0005622//intracellular;GO:0005737//cytoplasm;GO:0044464//cell part;GO:0044424//intracellular part;GO:0043231//intracellular membrane-bounded organelle;GO:0043229//intracellular organelle;GO:0005623//cell;GO:0043226//organelle;GO:0044444//cytoplasmic part	-	-
novel_circ_001061	miR5043-x	Bra003905	-	BnaA07g23330D [Brassica napus]	-	-	-	-	GO:0043231//intracellular membrane-bounded organelle;GO:0009536//plastid;GO:0005622//intracellular;GO:0005737//cytoplasm;GO:0043226//organelle;GO:0005623//cell;GO:0044444//cytoplasmic part;GO:0043229//intracellular organelle;GO:0043227//membrane-bounded organelle;GO:0044464//cell part;GO:0044424//intracellular part	-	GO:0015851//nucleobase transport;GO:0006810//transport;GO:0044765//single-organism transport;GO:0051234//establishment of localization;GO:0071702//organic substance transport;GO:0071705//nitrogen compound transport;GO:1902578//single-organism localization;GO:0051179//localization;GO:0044699//single-organism process
novel_circ_001061	miR5043-x	Bra005012	P5CSA	PREDICTED: delta-1-pyrroline-5-carboxylate synthase A isoform X1 [Brassica rapa]	Metabolism	Global and Overview;Amino acid metabolism	ko01100//Metabolic pathways;ko01110//Biosynthesis of secondary metabolites;ko01230//Biosynthesis of amino acids;ko00330//Arginine and proline metabolism	K12657	GO:0005622//intracellular;GO:0043226//organelle;GO:0044444//cytoplasmic part;GO:0044424//intracellular part;GO:0043231//intracellular membrane-bounded organelle;GO:0005623//cell;GO:0043227//membrane-bounded organelle;GO:0005737//cytoplasm;GO:0044464//cell part;GO:0043229//intracellular organelle;GO:0009536//plastid	GO:0016903//oxidoreductase activity, acting on the aldehyde or oxo group of donors;GO:0016620//oxidoreductase activity, acting on the aldehyde or oxo group of donors, NAD or NADP as acceptor;GO:0016491//oxidoreductase activity;GO:0003824//catalytic activity	GO:0042221//response to chemical;GO:0044281//small molecule metabolic process;GO:0006970//response to osmotic stress;GO:0044237//cellular metabolic process;GO:0009415//response to water;GO:0050896//response to stimulus;GO:1901360//organic cyclic compound metabolic process;GO:0044763//single-organism cellular process;GO:1901564//organonitrogen compound metabolic process;GO:0009987//cellular proces…
novel_circ_001061	miR5043-x	Bra005727	-	BnaC03g00800D [Brassica napus]	-	-	-	-	-	-	GO:0006979//response to oxidative stress;GO:0009642//response to light intensity;GO:0042221//response to chemical;GO:0050896//response to stimulus;GO:0009314//response to radiation;GO:0000302//response to reactive oxygen species;GO:0009628//response to abiotic stimulus;GO:1901700//response to oxygen-containing compound;GO:0006950//response to stress;GO:0009416//response to light stimulus
novel_circ_001061	miR5043-x	Bra005956	ICS1	BnaA07g04460D [Brassica napus]	-	-	-	-	-	-	-
novel_circ_001061	miR5043-x	Bra006541	dlcB	Dynein light chain type 1 family protein [Arabidopsis thaliana]	-	-	-	-	GO:0005856//cytoskeleton;GO:0043228//non-membrane-bounded organelle;GO:0015630//microtubule cytoskeleton;GO:0044424//intracellular part;GO:0043232//intracellular non-membrane-bounded organelle;GO:0005622//intracellular;GO:0043229//intracellular organelle;GO:0043226//organelle;GO:0044464//cell part;GO:0005623//cell	-	GO:0044763//single-organism cellular process;GO:0044699//single-organism process;GO:0009987//cellular process
novel_circ_001061	miR5043-x	Bra006614	-	BnaA03g08410D [Brassica napus]	-	-	-	-	-	-	-
novel_circ_001061	miR5043-x	Bra007179	P5CSB	PREDICTED: delta-1-pyrroline-5-carboxylate synthase B [Brassica rapa]	Metabolism	Global and Overview;Amino acid metabolism	ko01100//Metabolic pathways;ko01110//Biosynthesis of secondary metabolites;ko01230//Biosynthesis of amino acids;ko00330//Arginine and proline metabolism	K12657	GO:0030054//cell junction;GO:0005623//cell;GO:0044444//cytoplasmic part;GO:0005737//cytoplasm;GO:0043226//organelle;GO:0005622//intracellular;GO:0043231//intracellular membrane-bounded organelle;GO:0044424//intracellular part;GO:0044464//cell part;GO:0005911//cell-cell junction;GO:0009536//plastid;GO:0043227//membrane-bounded organelle;GO:0043229//intracellular organelle	GO:0016903//oxidoreductase activity, acting on the aldehyde or oxo group of donors;GO:0016620//oxidoreductase activity, acting on the aldehyde or oxo group of donors, NAD or NADP as acceptor;GO:0016740//transferase activity;GO:0016774//phosphotransferase activity, carboxyl group as acceptor;GO:0016772//transferase activity, transferring phosphorus-containing groups;GO:0003824//catalytic activity;…	GO:0071704//organic substance metabolic process;GO:0044699//single-organism process;GO:0043436//oxoacid metabolic process;GO:0009987//cellular process;GO:0003006//developmental process involved in reproduction;GO:0007275//multicellular organism development;GO:0044281//small molecule metabolic process;GO:0006793//phosphorus metabolic process;GO:0046483//heterocycle metabolic process;GO:0044710//si…
novel_circ_001061	miR5043-x	Bra009216	GCP3	BnaA10g24280D [Brassica napus]	-	-	-	-	GO:0005623//cell;GO:0044464//cell part;GO:0032991//macromolecular complex;GO:0016020//membrane;GO:0005886//plasma membrane;GO:0043234//protein complex;GO:0071944//cell periphery	GO:0005515//protein binding;GO:0008092//cytoskeletal protein binding;GO:0005488//binding	GO:0044699//single-organism process;GO:0000226//microtubule cytoskeleton organization;GO:1902589//single-organism organelle organization;GO:0016043//cellular component organization;GO:0007017//microtubule-based process;GO:0071840//cellular component organization or biogenesis;GO:0009987//cellular process;GO:0044763//single-organism cellular process;GO:0007010//cytoskeleton organization;GO:0006996…
novel_circ_001061	miR5043-x	Bra009607	-	BnaA10g27290D [Brassica napus]	-	-	-	-	GO:0043226//organelle;GO:0070013//intracellular organelle lumen;GO:0044464//cell part;GO:0016604//nuclear body;GO:0044451//nucleoplasm part;GO:0031974//membrane-enclosed lumen;GO:0044422//organelle part;GO:0043233//organelle lumen;GO:0043229//intracellular organelle;GO:0005623//cell;GO:0044446//intracellular organelle part;GO:0005634//nucleus;GO:0043231//intracellular membrane-bounded organelle;G…	GO:0005488//binding	GO:0033365//protein localization to organelle;GO:0009628//response to abiotic stimulus;GO:0034613//cellular protein localization;GO:0034504//protein localization to nucleus;GO:0070727//cellular macromolecule localization;GO:0051179//localization;GO:0051641//cellular localization;GO:0009639//response to red or far red light;GO:0008104//protein localization;GO:0050896//response to stimulus;GO:00330…
novel_circ_001061	miR5043-x	Bra009901	TMEM184A	PREDICTED: transmembrane protein 184A-like [Brassica rapa]	-	-	-	-	-	-	-
novel_circ_001061	miR5043-x	Bra010250	DRP4C	BnaA08g12650D [Brassica napus]	-	-	-	-	GO:0005623//cell;GO:0044424//intracellular part;GO:0044464//cell part;GO:0005622//intracellular	-	-
novel_circ_001061	miR5043-x	Bra010375	-	BnaA02g22070D [Brassica napus]	-	-	-	-	GO:0043229//intracellular organelle;GO:0005623//cell;GO:0043231//intracellular membrane-bounded organelle;GO:0005622//intracellular;GO:0044464//cell part;GO:0044424//intracellular part;GO:0043226//organelle;GO:0043227//membrane-bounded organelle	-	-
novel_circ_001061	miR5043-x	Bra011582	BRG3	PREDICTED: probable BOI-related E3 ubiquitin-protein ligase 2 [Brassica rapa]	-	-	-	-	-	-	-
novel_circ_001061	miR5043-x	Bra012063	At3g53210	PREDICTED: WAT1-related protein At3g53210 [Brassica rapa]	-	-	-	-	-	-	-
novel_circ_001061	miR5043-x	Bra012709	-	PREDICTED: leukocyte receptor cluster member 1 [Brassica rapa]	-	-	-	-	-	-	-
novel_circ_001061	miR5043-x	Bra012857	At5g10080	PREDICTED: aspartyl protease family protein 1-like [Brassica rapa]	-	-	-	-	GO:0016020//membrane;GO:0044425//membrane part;GO:0031224//intrinsic component of membrane	-	-
novel_circ_001061	miR5043-x	Bra012950	ATG3	PREDICTED: autophagy-related protein 3 [Brassica napus]	Cellular Processes	Transport and catabolism	ko04140//Regulation of autophagy	K08343	GO:0044464//cell part;GO:0044424//intracellular part;GO:0005737//cytoplasm;GO:0005623//cell;GO:0005622//intracellular;GO:0044444//cytoplasmic part	-	GO:0051641//cellular localization;GO:0009987//cellular process;GO:0051234//establishment of localization;GO:0044248//cellular catabolic process;GO:0051649//establishment of localization in cell;GO:0071840//cellular component organization or biogenesis;GO:0006605//protein targeting;GO:0008152//metabolic process;GO:0008104//protein localization;GO:0044699//single-organism process;GO:1902582//single…
novel_circ_001061	miR5043-x	Bra013063	At5g10080	BnaA03g39150D [Brassica napus]	-	-	-	-	-	-	-
novel_circ_001061	miR5043-x	Bra013489	-	PREDICTED: late embryogenesis abundant protein 1-like [Brassica napus]	-	-	-	-	-	-	GO:0022414//reproductive process;GO:0003006//developmental process involved in reproduction;GO:0000003//reproduction;GO:0032502//developmental process
novel_circ_001061	miR5043-x	Bra013546	CPL1	PREDICTED: RNA polymerase II C-terminal domain phosphatase-like 1 [Brassica rapa]	-	-	-	-	-	-	-
novel_circ_001061	miR5043-x	Bra014366	At1g29970	PREDICTED: 60S ribosomal protein L18a-like protein isoform X1 [Brassica rapa]	-	-	-	-	-	-	-
novel_circ_001061	miR5043-x	Bra014429	At3g61590	PREDICTED: F-box/kelch-repeat protein At3g61590-like [Brassica rapa]	-	-	-	-	-	GO:0019787//ubiquitin-like protein transferase activity;GO:0003824//catalytic activity;GO:0016740//transferase activity	GO:0051179//localization;GO:0044699//single-organism process;GO:0044707//single-multicellular organism process;GO:0007275//multicellular organism development;GO:0032502//developmental process;GO:0048856//anatomical structure development;GO:0032501//multicellular organismal process;GO:0048731//system development;GO:0044767//single-organism developmental process;GO:0010876//lipid localization;GO:00…
novel_circ_001061	miR5043-x	Bra014732	P5CSB	PREDICTED: delta-1-pyrroline-5-carboxylate synthase B-like [Brassica rapa]	Metabolism	Global and Overview;Amino acid metabolism	ko01100//Metabolic pathways;ko01110//Biosynthesis of secondary metabolites;ko01230//Biosynthesis of amino acids;ko00330//Arginine and proline metabolism	K12657	GO:0043231//intracellular membrane-bounded organelle;GO:0043226//organelle;GO:0009536//plastid;GO:0043227//membrane-bounded organelle;GO:0044424//intracellular part;GO:0005911//cell-cell junction;GO:0030054//cell junction;GO:0005623//cell;GO:0044444//cytoplasmic part;GO:0005622//intracellular;GO:0044464//cell part;GO:0005737//cytoplasm;GO:0043229//intracellular organelle	GO:0016620//oxidoreductase activity, acting on the aldehyde or oxo group of donors, NAD or NADP as acceptor;GO:0016903//oxidoreductase activity, acting on the aldehyde or oxo group of donors;GO:0016774//phosphotransferase activity, carboxyl group as acceptor;GO:0016491//oxidoreductase activity;GO:0016740//transferase activity;GO:0016772//transferase activity, transferring phosphorus-containing gr…	GO:0044238//primary metabolic process;GO:0044763//single-organism cellular process;GO:0007275//multicellular organism development;GO:0009987//cellular process;GO:0044699//single-organism process;GO:0046483//heterocycle metabolic process;GO:1901564//organonitrogen compound metabolic process;GO:0044281//small molecule metabolic process;GO:0019752//carboxylic acid metabolic process;GO:0006807//nitro…
novel_circ_001061	miR5043-x	Bra015162	-	PREDICTED: sarcalumenin-like [Brassica rapa]	-	-	-	-	-	-	-
novel_circ_001061	miR5043-x	Bra015474	SKIP16	PREDICTED: LOW QUALITY PROTEIN: F-box protein SKIP16 [Brassica rapa]	-	-	-	-	GO:1902494//catalytic complex;GO:0005622//intracellular;GO:0005623//cell;GO:0044464//cell part;GO:0031461//cullin-RING ubiquitin ligase complex;GO:0032991//macromolecular complex;GO:0000151//ubiquitin ligase complex;GO:0043234//protein complex;GO:0044424//intracellular part;GO:1990234//transferase complex	GO:0005488//binding	GO:0006089//lactate metabolic process;GO:0019752//carboxylic acid metabolic process;GO:1901615//organic hydroxy compound metabolic process;GO:0044281//small molecule metabolic process;GO:0043436//oxoacid metabolic process;GO:0044699//single-organism process;GO:0044237//cellular metabolic process;GO:0032787//monocarboxylic acid metabolic process;GO:0044763//single-organism cellular process;GO:0006…
novel_circ_001061	miR5043-x	Bra015655	Jade1	BnaA07g33710D [Brassica napus]	-	-	-	-	-	-	-
novel_circ_001061	miR5043-x	Bra015917	At1g74360	PREDICTED: probable LRR receptor-like serine/threonine-protein kinase At1g74360 [Brassica rapa]	-	-	-	-	GO:0044424//intracellular part;GO:0043226//organelle;GO:0016020//membrane;GO:0005622//intracellular;GO:0005623//cell;GO:0043227//membrane-bounded organelle;GO:0043229//intracellular organelle;GO:0044464//cell part;GO:0043231//intracellular membrane-bounded organelle	GO:0097159//organic cyclic compound binding;GO:0032549//ribonucleoside binding;GO:1901363//heterocyclic compound binding;GO:0001883//purine nucleoside binding;GO:0036094//small molecule binding;GO:0032550//purine ribonucleoside binding;GO:0005488//binding;GO:0001882//nucleoside binding;GO:0097367//carbohydrate derivative binding	GO:0002376//immune system process;GO:0009626//plant-type hypersensitive response;GO:0009814//defense response, incompatible interaction;GO:0033554//cellular response to stress;GO:0015031//protein transport;GO:0051707//response to other organism;GO:0043412//macromolecule modification;GO:0071495//cellular response to endogenous stimulus;GO:0032870//cellular response to hormone stimulus;GO:0006955//…
novel_circ_001061	miR5043-x	Bra016893	-	BnaA04g24320D [Brassica napus]	-	-	-	-	-	-	-
novel_circ_001061	miR5043-x	Bra017051	P5CSA	PREDICTED: delta-1-pyrroline-5-carboxylate synthase A [Brassica rapa]	Metabolism	Global and Overview;Amino acid metabolism	ko01100//Metabolic pathways;ko01110//Biosynthesis of secondary metabolites;ko01230//Biosynthesis of amino acids;ko00330//Arginine and proline metabolism	K12657	GO:0044444//cytoplasmic part;GO:0043227//membrane-bounded organelle;GO:0043229//intracellular organelle;GO:0044424//intracellular part;GO:0005623//cell;GO:0009536//plastid;GO:0043226//organelle;GO:0005737//cytoplasm;GO:0043231//intracellular membrane-bounded organelle;GO:0005622//intracellular;GO:0044464//cell part	GO:0016903//oxidoreductase activity, acting on the aldehyde or oxo group of donors;GO:0003824//catalytic activity;GO:0016620//oxidoreductase activity, acting on the aldehyde or oxo group of donors, NAD or NADP as acceptor;GO:0016491//oxidoreductase activity	GO:0008152//metabolic process;GO:0006082//organic acid metabolic process;GO:0048856//anatomical structure development;GO:0006972//hyperosmotic response;GO:0006807//nitrogen compound metabolic process;GO:0044767//single-organism developmental process;GO:0009414//response to water deprivation;GO:0009628//response to abiotic stimulus;GO:0044710//single-organism metabolic process;GO:0044281//small mo…
novel_circ_001061	miR5043-x	Bra017192	-	BnaA04g21370D [Brassica napus]	-	-	-	-	-	-	-
novel_circ_001061	miR5043-x	Bra018287	-	PREDICTED: golgin subfamily A member 6-like protein 2 isoform X1 [Brassica napus]	-	-	-	-	-	-	-
novel_circ_001061	miR5043-x	Bra018571	-	Chaperone DnaJ-domain superfamily protein [Arabidopsis thaliana]	-	-	-	-	-	-	GO:0044238//primary metabolic process;GO:0043170//macromolecule metabolic process;GO:0071704//organic substance metabolic process;GO:0044237//cellular metabolic process;GO:0044260//cellular macromolecule metabolic process;GO:0044267//cellular protein metabolic process;GO:0008152//metabolic process;GO:0009987//cellular process;GO:0019538//protein metabolic process
novel_circ_001061	miR5043-x	Bra018904	-	BnaAnng22280D [Brassica napus]	-	-	-	-	GO:0043226//organelle;GO:0043229//intracellular organelle;GO:0044464//cell part;GO:0043231//intracellular membrane-bounded organelle;GO:0044424//intracellular part;GO:0005623//cell;GO:0043227//membrane-bounded organelle;GO:0005622//intracellular	-	-
novel_circ_001061	miR5043-x	Bra019100	SUFE1	PREDICTED: protein transport protein sft2-like [Brassica rapa]	-	-	-	-	GO:0043227//membrane-bounded organelle;GO:0044464//cell part;GO:0043231//intracellular membrane-bounded organelle;GO:0005622//intracellular;GO:0005623//cell;GO:0043226//organelle;GO:0043229//intracellular organelle;GO:0044424//intracellular part	-	GO:1902582//single-organism intracellular transport;GO:0051641//cellular localization;GO:0051234//establishment of localization;GO:1902578//single-organism localization;GO:0016192//vesicle-mediated transport;GO:0051649//establishment of localization in cell;GO:0046907//intracellular transport;GO:0051179//localization;GO:0048193//Golgi vesicle transport;GO:0006810//transport;GO:0044699//single-org…
novel_circ_001061	miR5043-x	Bra019379	USP39	PREDICTED: U4/U6.U5 tri-snRNP-associated protein 2-like [Brassica rapa]	Genetic Information Processing	Transcription	ko03040//Spliceosome	K12847	-	-	-
novel_circ_001061	miR5043-x	Bra019804	-	PREDICTED: coilin-like isoform X1 [Brassica rapa]	-	-	-	-	-	-	-
novel_circ_001061	miR5043-x	Bra020532	TMEM184A	PREDICTED: transmembrane protein 184A-like [Brassica rapa]	-	-	-	-	-	-	-
novel_circ_001061	miR5043-x	Bra020619	Xab2	PREDICTED: pre-mRNA-splicing factor SYF1 [Brassica rapa]	Genetic Information Processing	Transcription	ko03040//Spliceosome	K12867	-	-	-
novel_circ_001061	miR5043-x	Bra020713	NSP5	PREDICTED: nitrile-specifier protein 5-like [Brassica rapa]	-	-	-	-	GO:0044424//intracellular part;GO:0044444//cytoplasmic part;GO:0005622//intracellular;GO:0044464//cell part;GO:0005737//cytoplasm;GO:0005623//cell	-	GO:0006950//response to stress;GO:0016054//organic acid catabolic process;GO:0044282//small molecule catabolic process;GO:0010033//response to organic substance;GO:0043170//macromolecule metabolic process;GO:0044249//cellular biosynthetic process;GO:0009056//catabolic process;GO:0022607//cellular component assembly;GO:0044255//cellular lipid metabolic process;GO:0044257//cellular protein cataboli…
novel_circ_001061	miR5043-x	Bra020796	TMEM184A	PREDICTED: transmembrane protein 184A [Brassica rapa]	-	-	-	-	-	-	-
novel_circ_001061	miR5043-x	Bra022159	NSP1	PREDICTED: nitrile-specifier protein 1-like [Brassica oleracea var. oleracea] [Brassica oleracea]	-	-	-	-	-	-	-
novel_circ_001061	miR5043-x	Bra022661	GYP7	PREDICTED: GTPase-activating protein GYP7-like isoform X1 [Brassica rapa]	-	-	-	-	-	-	-
novel_circ_001061	miR5043-x	Bra023875	-	DMP1 [Arabidopsis thaliana]	-	-	-	-	-	-	-
novel_circ_001061	miR5043-x	Bra024333	FLOT3	PREDICTED: flotillin-like protein 3 [Brassica rapa]	-	-	-	-	GO:0005623//cell;GO:0043226//organelle;GO:0044424//intracellular part;GO:0005622//intracellular;GO:0043231//intracellular membrane-bounded organelle;GO:0016020//membrane;GO:0043229//intracellular organelle;GO:0043227//membrane-bounded organelle;GO:0044464//cell part	-	GO:0044763//single-organism cellular process;GO:0044699//single-organism process;GO:0010033//response to organic substance;GO:1901698//response to nitrogen compound;GO:0000160//phosphorelay signal transduction system;GO:0035556//intracellular signal transduction;GO:0009987//cellular process;GO:0023052//signaling;GO:0065007//biological regulation;GO:0050896//response to stimulus;GO:0007154//cell c…
novel_circ_001061	miR5043-x	Bra026415	-	PREDICTED: DNA ligase 1 [Brassica rapa]	-	-	-	-	-	-	-
novel_circ_001061	miR5043-x	Bra026663	STL2P	PREDICTED: SEC12-like protein 2 isoform X1 [Brassica rapa]	Genetic Information Processing	Folding, sorting and degradation	ko04141//Protein processing in endoplasmic reticulum	K14003	-	-	-
novel_circ_001061	miR5043-x	Bra028053	-	PREDICTED: sarcalumenin-like [Brassica rapa]	-	-	-	-	-	-	-
novel_circ_001061	miR5043-x	Bra028506	-	PREDICTED: myosin-10 isoform X1 [Brassica rapa]	-	-	-	-	-	-	-
novel_circ_001061	miR5043-x	Bra028542	-	BnaA07g15890D [Brassica napus]	-	-	-	-	GO:0005737//cytoplasm;GO:0043231//intracellular membrane-bounded organelle;GO:0044444//cytoplasmic part;GO:0016020//membrane;GO:0044464//cell part;GO:0043226//organelle;GO:0044424//intracellular part;GO:0005623//cell;GO:0009536//plastid;GO:0005622//intracellular;GO:0043229//intracellular organelle;GO:0043227//membrane-bounded organelle	-	-
novel_circ_001061	miR5043-x	Bra028722	GCP3	PREDICTED: gamma-tubulin complex component 3 [Brassica rapa]	-	-	-	-	GO:0005623//cell;GO:0005886//plasma membrane;GO:0043234//protein complex;GO:0032991//macromolecular complex;GO:0071944//cell periphery;GO:0044464//cell part;GO:0016020//membrane	GO:0005515//protein binding;GO:0008092//cytoskeletal protein binding;GO:0005488//binding	GO:1902589//single-organism organelle organization;GO:0071840//cellular component organization or biogenesis;GO:0044699//single-organism process;GO:0044763//single-organism cellular process;GO:0009987//cellular process;GO:0007010//cytoskeleton organization;GO:0007017//microtubule-based process;GO:0006996//organelle organization;GO:0000226//microtubule cytoskeleton organization;GO:0016043//cellula…
novel_circ_001061	miR5043-x	Bra028753	PAI1	PREDICTED: N-(5'-phosphoribosyl)anthranilate isomerase 1, chloroplastic isoform X2 [Brassica rapa]	Metabolism	Amino acid metabolism;Global and Overview	ko01100//Metabolic pathways;ko01110//Biosynthesis of secondary metabolites;ko01130//Biosynthesis of antibiotics;ko01230//Biosynthesis of amino acids;ko00400//Phenylalanine, tyrosine and tryptophan biosynthesis	K01817	GO:0009536//plastid;GO:0043231//intracellular membrane-bounded organelle;GO:0044444//cytoplasmic part;GO:0043227//membrane-bounded organelle;GO:0044424//intracellular part;GO:0005737//cytoplasm;GO:0005622//intracellular;GO:0044464//cell part;GO:0005623//cell;GO:0043226//organelle;GO:0043229//intracellular organelle	GO:0016853//isomerase activity;GO:0016861//intramolecular oxidoreductase activity, interconverting aldoses and ketoses;GO:0003824//catalytic activity;GO:0016860//intramolecular oxidoreductase activity	GO:0009308//amine metabolic process;GO:1901564//organonitrogen compound metabolic process;GO:0006576//cellular biogenic amine metabolic process;GO:0071704//organic substance metabolic process;GO:0009987//cellular process;GO:0006082//organic acid metabolic process;GO:0008152//metabolic process;GO:0006807//nitrogen compound metabolic process;GO:0044238//primary metabolic process;GO:0044237//cellula…
novel_circ_001061	miR5043-x	Bra029364	NIC2	PREDICTED: nicotinamidase 2-like [Brassica rapa]	-	-	-	-	-	GO:0016811//hydrolase activity, acting on carbon-nitrogen (but not peptide) bonds, in linear amides;GO:0003824//catalytic activity;GO:0016787//hydrolase activity;GO:0016810//hydrolase activity, acting on carbon-nitrogen (but not peptide) bonds	GO:0006807//nitrogen compound metabolic process;GO:0044699//single-organism process;GO:0044763//single-organism cellular process;GO:0006725//cellular aromatic compound metabolic process;GO:0072524//pyridine-containing compound metabolic process;GO:0044237//cellular metabolic process;GO:0055086//nucleobase-containing small molecule metabolic process;GO:0008152//metabolic process;GO:0009987//cellul…
novel_circ_001061	miR5043-x	Bra029575	-	BnaA09g19730D [Brassica napus]	-	-	-	-	GO:0044424//intracellular part;GO:0005622//intracellular;GO:0043229//intracellular organelle;GO:0005737//cytoplasm;GO:0043227//membrane-bounded organelle;GO:0043231//intracellular membrane-bounded organelle;GO:0043226//organelle;GO:0009536//plastid;GO:0044444//cytoplasmic part;GO:0044464//cell part;GO:0005623//cell	GO:0046914//transition metal ion binding;GO:0046872//metal ion binding;GO:0005488//binding;GO:0043169//cation binding;GO:0043167//ion binding	GO:0008152//metabolic process;GO:0006996//organelle organization;GO:0071704//organic substance metabolic process;GO:0044710//single-organism metabolic process;GO:0043933//macromolecular complex subunit organization;GO:0044267//cellular protein metabolic process;GO:0000338//protein deneddylation;GO:0016043//cellular component organization;GO:0009416//response to light stimulus;GO:0044249//cellular…
novel_circ_001061	miR5043-x	Bra029653	ATG10	PREDICTED: ubiquitin-like-conjugating enzyme ATG10 [Brassica rapa]	Cellular Processes	Transport and catabolism	ko04140//Regulation of autophagy	K17888	GO:0044464//cell part;GO:0005622//intracellular;GO:0044424//intracellular part;GO:0005623//cell	GO:0016874//ligase activity;GO:0003824//catalytic activity;GO:0008641//small protein activating enzyme activity;GO:0016877//ligase activity, forming carbon-sulfur bonds	GO:0009620//response to fungus;GO:0009607//response to biotic stimulus;GO:0009056//catabolic process;GO:0008152//metabolic process;GO:0044248//cellular catabolic process;GO:0044237//cellular metabolic process;GO:0009987//cellular process;GO:0009605//response to external stimulus;GO:0050896//response to stimulus;GO:0043207//response to external biotic stimulus;GO:0051707//response to other organis…
novel_circ_001061	miR5043-x	Bra029834	SEC8	BnaC05g42720D [Brassica napus]	-	-	-	-	GO:0005911//cell-cell junction;GO:0030054//cell junction;GO:0016020//membrane;GO:0043234//protein complex;GO:0044464//cell part;GO:0044444//cytoplasmic part;GO:0005622//intracellular;GO:0005623//cell;GO:0032991//macromolecular complex;GO:0005737//cytoplasm;GO:0044424//intracellular part	GO:0005488//binding	GO:0000904//cell morphogenesis involved in differentiation;GO:0044281//small molecule metabolic process;GO:0000902//cell morphogenesis;GO:0048468//cell development;GO:0010191//mucilage metabolic process;GO:0044763//single-organism cellular process;GO:0048856//anatomical structure development;GO:0006006//glucose metabolic process;GO:0019318//hexose metabolic process;GO:0071840//cellular component …
novel_circ_001061	miR5043-x	Bra030057	U2AF35A	BnaA07g36590D [Brassica napus]	Genetic Information Processing	Transcription	ko03040//Spliceosome	K12836	GO:0043231//intracellular membrane-bounded organelle;GO:0044424//intracellular part;GO:0044464//cell part;GO:0043229//intracellular organelle;GO:0043227//membrane-bounded organelle;GO:0005622//intracellular;GO:0043226//organelle;GO:0005623//cell	-	GO:0009416//response to light stimulus;GO:0009648//photoperiodism;GO:0000278//mitotic cell cycle;GO:0009628//response to abiotic stimulus;GO:0044763//single-organism cellular process;GO:0050896//response to stimulus;GO:0009987//cellular process;GO:0007049//cell cycle;GO:0009314//response to radiation;GO:0044699//single-organism process
novel_circ_001061	miR5043-x	Bra031177	S6PDH	PREDICTED: NADP-dependent D-sorbitol-6-phosphate dehydrogenase [Brassica rapa]	Metabolism	Global and Overview;Lipid metabolism;Carbohydrate metabolism	ko01100//Metabolic pathways;ko00040//Pentose and glucuronate interconversions;ko00051//Fructose and mannose metabolism;ko00561//Glycerolipid metabolism;ko00052//Galactose metabolism	K00011	GO:0044424//intracellular part;GO:0005622//intracellular;GO:0044444//cytoplasmic part;GO:0005623//cell;GO:0005737//cytoplasm;GO:0044464//cell part	-	GO:0010038//response to metal ion;GO:0042221//response to chemical;GO:0050896//response to stimulus;GO:0010035//response to inorganic substance
novel_circ_001061	miR5043-x	Bra031359	-	BnaC05g17340D [Brassica napus]	-	-	-	-	-	-	-
novel_circ_001061	miR5043-x	Bra031626	BSL2	PREDICTED: serine/threonine-protein phosphatase BSL2 [Brassica rapa]	-	-	-	-	GO:0044444//cytoplasmic part;GO:0016020//membrane;GO:0043229//intracellular organelle;GO:0005623//cell;GO:0044424//intracellular part;GO:0043226//organelle;GO:0005622//intracellular;GO:0044464//cell part;GO:0043231//intracellular membrane-bounded organelle;GO:0005737//cytoplasm;GO:0043227//membrane-bounded organelle	-	-
novel_circ_001061	miR5043-x	Bra031896	FLOT3	PREDICTED: flotillin-like protein 3 [Brassica rapa]	-	-	-	-	-	-	-
novel_circ_001061	miR5043-x	Bra031991	RGL2	PREDICTED: LOW QUALITY PROTEIN: DELLA protein RGL2 [Brassica rapa]	Environmental Information Processing	Signal transduction	ko04075//Plant hormone signal transduction	K14494	GO:0044424//intracellular part;GO:0005622//intracellular;GO:0043229//intracellular organelle;GO:0005623//cell;GO:0043226//organelle;GO:0043227//membrane-bounded organelle;GO:0044464//cell part;GO:0043231//intracellular membrane-bounded organelle	GO:0001071//nucleic acid binding transcription factor activity;GO:0005488//binding	GO:0006970//response to osmotic stress;GO:0009845//seed germination;GO:0044710//single-organism metabolic process;GO:0044237//cellular metabolic process;GO:0006972//hyperosmotic response;GO:0051239//regulation of multicellular organismal process;GO:0090351//seedling development;GO:0006950//response to stress;GO:0071495//cellular response to endogenous stimulus;GO:0023052//signaling;GO:2000026//re…
novel_circ_001061	miR5043-x	Bra032227	-	BnaC02g28930D [Brassica napus]	-	-	-	-	-	-	-
novel_circ_001061	miR5043-x	Bra034208	STA1	PREDICTED: protein STABILIZED1 [Brassica rapa]	Genetic Information Processing	Transcription	ko03040//Spliceosome	K12855	GO:0005623//cell;GO:0005622//intracellular;GO:0043227//membrane-bounded organelle;GO:0043226//organelle;GO:0044424//intracellular part;GO:0044464//cell part;GO:0043231//intracellular membrane-bounded organelle;GO:0043229//intracellular organelle	-	GO:0090304//nucleic acid metabolic process;GO:0000375//RNA splicing, via transesterification reactions;GO:0016070//RNA metabolic process;GO:0034641//cellular nitrogen compound metabolic process;GO:0009987//cellular process;GO:0008152//metabolic process;GO:0010467//gene expression;GO:0043170//macromolecule metabolic process;GO:0044238//primary metabolic process;GO:0044260//cellular macromolecule m…
novel_circ_001061	miR5043-x	Bra036493	MAN2	PREDICTED: mannan endo-1,4-beta-mannosidase 2-like [Brassica rapa]	Metabolism	Carbohydrate metabolism	ko00051//Fructose and mannose metabolism	K19355	-	-	-
novel_circ_001061	miR5043-x	Bra036494	MAN2	PREDICTED: mannan endo-1,4-beta-mannosidase 2-like [Brassica rapa]	Metabolism	Carbohydrate metabolism	ko00051//Fructose and mannose metabolism	K19355	-	-	-
novel_circ_001061	miR5043-x	Bra037299	NERD	PREDICTED: zinc finger CCCH domain-containing protein 19 [Brassica rapa]	-	-	-	-	-	-	-
novel_circ_001061	miR5043-x	Bra037506	NSP5	BnaA06g30390D [Brassica napus]	-	-	-	-	GO:0005622//intracellular;GO:0044464//cell part;GO:0044424//intracellular part;GO:0044444//cytoplasmic part;GO:0005623//cell;GO:0005737//cytoplasm	-	GO:0044763//single-organism cellular process;GO:0071822//protein complex subunit organization;GO:0009058//biosynthetic process;GO:0043933//macromolecular complex subunit organization;GO:0016042//lipid catabolic process;GO:0016043//cellular component organization;GO:0016054//organic acid catabolic process;GO:0044273//sulfur compound catabolic process;GO:0044237//cellular metabolic process;GO:00442…
novel_circ_001061	miR5043-x	Bra039263	CRK3	PREDICTED: CDPK-related kinase 3 [Brassica rapa]	-	-	-	-	GO:0044424//intracellular part;GO:0043227//membrane-bounded organelle;GO:0005623//cell;GO:0043229//intracellular organelle;GO:0044464//cell part;GO:0043231//intracellular membrane-bounded organelle;GO:0016020//membrane;GO:0005622//intracellular;GO:0043226//organelle	GO:0003824//catalytic activity;GO:0016773//phosphotransferase activity, alcohol group as acceptor;GO:0043169//cation binding;GO:0016740//transferase activity;GO:0016301//kinase activity;GO:0005515//protein binding;GO:0016772//transferase activity, transferring phosphorus-containing groups;GO:0004672//protein kinase activity;GO:0043167//ion binding;GO:0005488//binding;GO:0046872//metal ion binding	GO:0007275//multicellular organism development;GO:0044767//single-organism developmental process;GO:0051707//response to other organism;GO:0016310//phosphorylation;GO:0009607//response to biotic stimulus;GO:0032501//multicellular organismal process;GO:0044260//cellular macromolecule metabolic process;GO:0009814//defense response, incompatible interaction;GO:0051704//multi-organism process;GO:0006…
novel_circ_001061	miR5043-x	Bra039460	GID1A	PREDICTED: gibberellin receptor GID1A [Brassica rapa]	Environmental Information Processing	Signal transduction	ko04075//Plant hormone signal transduction	K14493	GO:0043231//intracellular membrane-bounded organelle;GO:0005623//cell;GO:0043227//membrane-bounded organelle;GO:0043226//organelle;GO:0044424//intracellular part;GO:0043229//intracellular organelle;GO:0044464//cell part;GO:0005622//intracellular	GO:0019840//isoprenoid binding;GO:0005488//binding;GO:0008289//lipid binding	GO:0001101//response to acid chemical;GO:0010033//response to organic substance;GO:0009312//oligosaccharide biosynthetic process;GO:0010476//gibberellin mediated signaling pathway;GO:0071396//cellular response to lipid;GO:0044710//single-organism metabolic process;GO:0006972//hyperosmotic response;GO:1901701//cellular response to oxygen-containing compound;GO:0023052//signaling;GO:1901576//organi…
novel_circ_001061	miR5043-x	Bra040463	-	BnaAnng03280D [Brassica napus]	-	-	-	-	-	-	-
